# Supplementary material for: R-locus for roaned coat is associated with a tandem duplication in an intronic region of USH2A in dogs and also contributes to Dalmatian spotting
Source: PubMed Central journal article supplement (PMC7987146; doi:10.1371/journal.pone.0248233), 2021-03-23

A

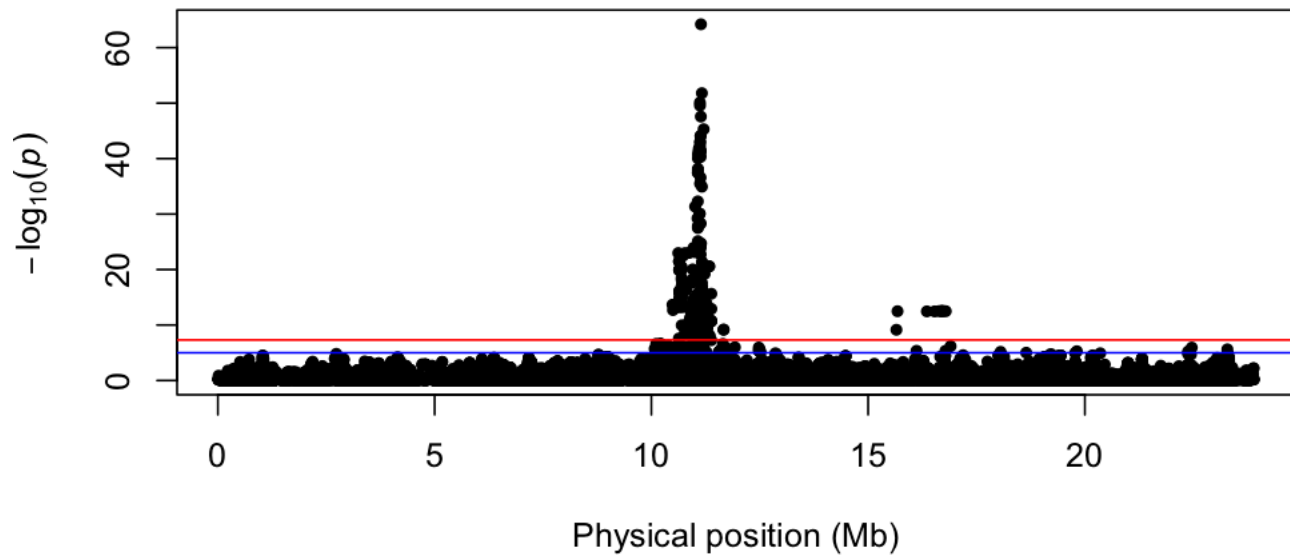

B

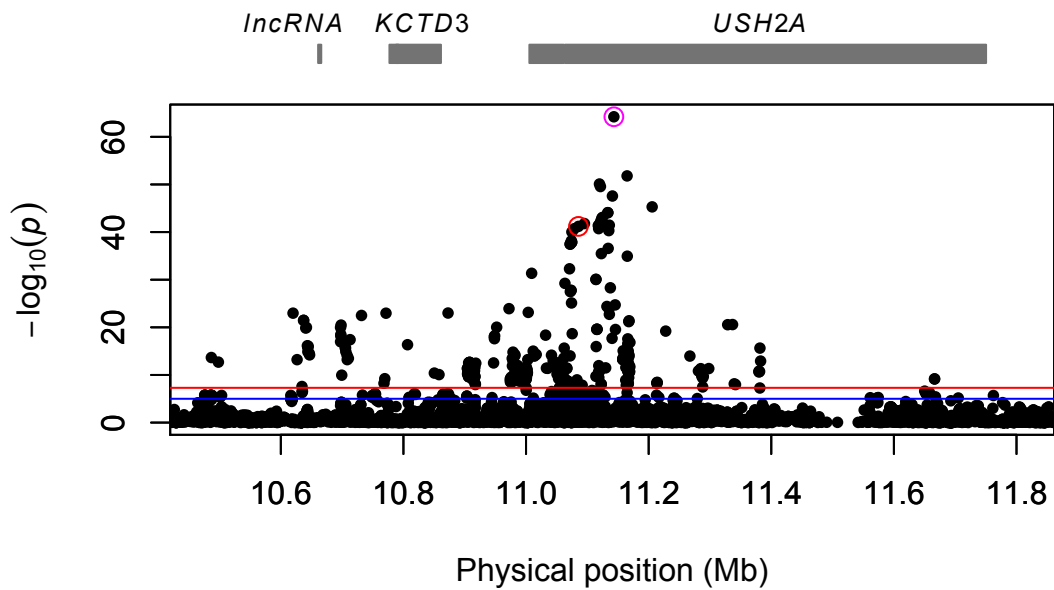

Supplement: pone.0248233.s008.pdf [file pone.0248233.s008.pdf]
