# Supplementary material for: R-locus for roaned coat is associated with a tandem duplication in an intronic region of USH2A in dogs and also contributes to Dalmatian spotting
Source: PLoS One. 2021 Mar 23;16(3):e0248233. doi: 10.1371/journal.pone.0248233 (PMC7987146; doi:10.1371/journal.pone.0248233)
Supplement: S5 Table — The following results are also included: genotypes at the most significant marker in GWAS (CFA38:11,085,443) (GWAS_marker), the copy number of the duplicated region (CFA38:11,131,835–11,143–237) inferred by haplotypes (Dup_CN), presence/absence (1 or 0) of the 400-bp amplicon in the breakpoint PCR assay (BP_PCR), imputed genotypes at the most significant marker in CWAS (CFA38:11,143,243) (CWAS_marker) and their validation result by Sanger sequencing (CWAS_sanger), and genotypes of the marker for the presence/absence of the SINE element in a putative regulatory region of MITF (CFA20:21,836,232). (XLSX) [file pone.0248233.s018.xlsx]

## Sheet: S2_Table
S5 Table. Haplotypes identified in roaned dogs and control dogs in the discovery and validation panels as well as purebred Dalmatians.
panel	phenotype	genotype_id	hap1*	hap2*	hap1_ID	hap2_ID	GWAS_marker$	Dup_CN	BP_PCR	CWAS_marker#	CWAS_sanger	MITF_SINE!
discovery	control	dog_1003	GAAAAAGAGAGGGGGAGGGGAGGGAGGAGAAGAGGAGGACGGGGAGGAGCAG	GAAGGGGAGAGAAGAAGGAGGGAGAGGGGCAGGAGGGAAGAGGGAGGAGCAG	hap_c05	hap_c15	GG	2	0	CC	NA	-/-
discovery	control	dog_1005	GAAAAAGAGAGGGGGAGGGGAGGGAGGAGAAGAGGAGGACGGGGAGGAGCAG	GAAAAAAAGGGGGGGGGGAGGGGGAGGGGAAGAAGAGAAGAAGAAGGAGCAG	hap_c05	hap_c01	GG	2	0	CC	NA	-/-
discovery	control	dog_1006	GAAGGGGAGGGGAGAAGGGGAGAGAGGGGAGGGGGAGAAGGGGGAGGAGCGG	GAGAAAGAGAGAGGGGGGGGAGAGAGGGGAAGGAGAAGAGAGGGGAAAGCGG	hap_c57	hap_c55	GG	2	NA	CC	NA	SINE/SINE
discovery	control	dog_1011	GAAAAAAAGGGGGGGGGGAGGGGGAGGGGAAGAAGAGAAGAAGAAGGAGCAG	GAAAAAGAGAGGGGAAGGAGGGAAAGGAGAAGGGGAGAAGGGGAAGGAGCAG	hap_c01	hap_c02	GG	2	NA	CC	NA	-/-
discovery	control	dog_1013	GAGAAAGAGGGAGGGGGGGAGGAGAGGGGAAAGGGGAAACGGGGAGGAACAG	GAGAAAGAGAGAGGGGGGGGAGGGCGAAGAAGGAGGGAAGAGGGAGGAGCGG	hap_c16	hap_c74	GG	2	NA	CC	NA	-/-
discovery	control	dog_1015	ATGAAAGAGAAAGAGAGGAGAGGGAGGGGAGGGGGAGAAGGGGGAGGAGCAG	GTGAAAGAGAGAGGGAGAAGAGAGCGGAAAAGAAGGGGAGGGGAAGGAAAAG	hap_c25	hap_c13	GG	2	NA	CC	NA	-/-
discovery	control	dog_1018	GAAAAAAAGGGGGGGGGGAGGGGGAGGGGAAGAAGAGAAGAAGAAGGAGCAG	GAGAAAGAGAGGGGGGGGGGAGAGAGGAAAAGGAGGGAAGAGGGAGGAGCAG	hap_c01	hap_c04	GG	2	NA	CC	NA	-/-
discovery	control	dog_1019	ATGAAAGAGAGAGGGGGGGGGGGGAGGAAAGGGAGAGAAGAGGGAGGAGCGG	ATGAAAGAGAGAGGGGGGGGGGGGAGGAAAGGGAGAGAAGAGGGAGGAGCGG	hap_c03	hap_c03	GG	2	NA	CC	NA	-/-
discovery	control	dog_1021	GAGAAAGAGAGGGGGGGGGGAGAGAGGAAAAGGAGGGAAGAGGGAGGAGCAG	ATGAAAGAGAGAGGGGGGGGGGGGAGGAAAGGGAGAGAAGAGGGAGGAGCGG	hap_c04	hap_c03	GG	2	NA	CC	NA	-/-
discovery	control	dog_1022	ATGAAAGAGAAAGAGAGGAGAGGGAGGGGAGGGGGAGAAGGGGGAGGAGCAG	GAAAAAAAGGAGGGGGGGGGAGAGCAAGGCAGAAGAGGGCGAGGAGGAACAA	hap_c25	hap_c35	GG	2	NA	CC	NA	SINE/-
discovery	control	dog_1023	GAAAAAAAGGGGGGGGGGAGGGGGAGGGGAAGAAGAGAAGAAGAAGGAGCAG	GAGAAAGAGAGGGGGAGAGGAGGGAGGGGAAGGGGAGAAGAGGGAGGAGAAG	hap_c01	hap_c08	GG	2	NA	CC	NA	SINE/-
discovery	control	dog_1024	GAGAAAGAGAGGGGGGGGGGAGAGAGGAAAAGAAGGGAAGAGGGAGGAGCAG	ATAAAAGAGAGGGGGAGAAAGGGGAGGAGAAGGAGGGAAGGGGAAGGAACGG	hap_c30	hap_c09	GG	2	0	CC	NA	-/-
discovery	control	dog_1026	GAAAAAAAGGGGGGGGGGAGGGGGAGGGGAAGAAGAGAAGAAGAAGGAGCAG	GAAAAAAAGGGGGGGGGGAGGGGGAGGGGAAGAAGAGAAGAAGAAGGAGCAG	hap_c01	hap_c01	GG	2	NA	CC	NA	-/-
discovery	control	dog_1027	GAAAAAGAGAGGGGGAGGGGAGGGAGGAGAAGAGGAGGACGGGGAGGAGCAG	GAAGGAAAGGAGGGGAGGGGAGGGAGGGGAAGGGGAGAAGAGGGAGGAGCGG	hap_c05	hap_c161	GG	2	NA	CC	NA	-/-
discovery	control	dog_1028	GAAGGAAAGGAGGGGGGGGGAGAGAGGGGAAGGAGAGAAGAGGGAGGAGCAG	GAAAAAAAGGGGGGGGGGAGGGGGAGGGGAAGAAGAGAAGAAGAAGGAGCAG	hap_c160	hap_c01	GG	2	NA	CC	NA	-/-
discovery	control	dog_1030	GAAAAAGAGAGGGGGAGGGGAGGGAGGAGAAGAGGAGGACGGGGAGGAGCAG	GAAAAAGAGAGGGGGAGAAGGGGGAGGGGAAGAGGAGAAGAGGGAGGAGCGG	hap_c05	hap_c20	GG	2	0	CC	NA	-/-
discovery	control	dog_1037	GAAAAAAAGGAGGGGGGGGGAGGGCGAAGAAGGAGGGGAGGGGGAGAAGCGG	GAAGAGAGGAGGAGAAGGAGAGGGAGGAGCAGGAGAGAAGAAGAGAAAACAA	hap_c07	hap_c06	GG	2	NA	CC	NA	-/-
discovery	control	dog_1045	GAGAAAGAGGGAGGGAGGGAGGAGAGGGGAAAGGGGAAACGGGGAGGAACAG	GTGAAAGAGAGAGGGAGAAGAGAGCGGAAAAGAAGGGGAGGGGAAGGAAAAG	hap_c11	hap_c13	GG	2	NA	CC	NA	-/-
discovery	control	dog_1050	GAAAAAAAGGGGGGGGGGAGGGGGAGGGGAAGAAGAGAAGAAGAAGGAGCAG	ATGAAAGAGAGAGGGGGGGGGGGGAGGAAAGGGAGAGAAGAGGGAGGAGCGG	hap_c01	hap_c03	GG	2	NA	CC	NA	SINE/-
discovery	control	dog_1051	GAAGGGGAGAGAAGAAGAAAAGAGAGGAAAAGGAGGGAAGGAGGAGGAGCAG	GAAGAGAGAAGGGGGGGGAGAAAAAGGGGAAGGGGGGGAGGGGGAGGAGAAG	hap_c159	hap_c46	GG	2	NA	CC	NA	SINE/SINE
discovery	control	dog_1052	GAAGAGAAGAGAGGGGGAAGAGAGAGGGGAAGGGGGGAAGGGGGAGGCGAAA	GAAGGGAGGAAGAGAAGGGGAGAGCGAAAAAGGAGGGAACGGGGAGGCGAAA	hap_c173	hap_c82	GG	2	NA	CC	NA	-/-
discovery	control	dog_1053	GAAGAGAGGAGAGGGGGGGGAGGGAGGAGAAGGAGAGAAGAGGGGAAAGCAG	GAAGGGAGGAAGAGAAGGGGAGAGCGAAAAAGGAGGGAACGGGGAGGCGAAA	hap_c165	hap_c82	GG	2	NA	CC	NA	-/-
discovery	control	dog_1056	ATGAAAGAGAAAGAGAGGAGAGGGAGGGGAGGGGGAGAAGGGGGAGGAGCAG	GAGAAAGAGGGAGGGAGGGAGGAGAGGGGAAAGGGGAAACGGGGAGGAACAG	hap_c25	hap_c11	GG	2	NA	CC	NA	-/-
discovery	control	dog_1058	GAAAAAGAGAGGGGAAGGAGGGAAAGGAGAAGGGGAGAAGGGGAAGGAGCAG	ATAGGGGAGGGAGGGGGGAGAAAACAAGGCAAAAGAGAAGAGGGAGAAGCGG	hap_c02	hap_c232	GG	2	NA	CC	NA	-/-
discovery	control	dog_1059	GTGAAGAAGGGGGGAAGGAGAAGGAGGGGAAGGGGAGAAGAGGAAGGAAAAG	GAAAAAGAGAGGGGGAGGGGAGAGAGGAAAAGAAGGGAAGAGGGAGGAGCAG	hap_c32	hap_c183	GG	2	NA	CC	NA	SINE/-
discovery	control	dog_1060	GAAAAAAAGGAGGGGGGGGGAGGGCGAAGAAGGAGGGGAGGGGGAGAAGCGG	GAAGGGGAGAGAAGAAGGAGGGAGAGGGGCAGGAGGGAAGAGGGAGGAGCAG	hap_c07	hap_c15	GG	2	NA	CC	NA	-/-
discovery	control	dog_1061	ATGAAAGAGAGAGGGGGGGGGGGGAGGAAAGGGAGAGAAGAGGGAGGAGCGG	ATGAAAGAGAGAGGGGGGGGGGGGAGGAAAGGGAGAGAAGAGGGAGGAGCGG	hap_c03	hap_c03	GG	2	NA	CC	NA	-/-
discovery	control	dog_1062	GAGAAAGAGGGAGGGGGGAGGGGGAGGAGAAGAGGAGAAGAGGGAGGAGCGG	GAAAAAAAGAGGGGGGGGAGGGGGAGGGGAAGAAGAGAAGAAGAAGGAGCAG	hap_c116	hap_c12	GG	2	NA	CC	NA	-/-
discovery	control	dog_1064	ATGAAAGAGAGAGGGGGGGGGGGGAGGAAAGGGAGAGAAGAGGGAGGAGCGG	ATGAAAGAGAGAGGGGGGGGGGGGAGGAAAGGGGGAGAAGGAGGAAGCGCGG	hap_c03	hap_c220	GG	2	NA	CC	NA	-/-
discovery	control	dog_1065	GAAAAAAAGAGGGGGGGGAGGGGGAGGGGAAGAAGAGAAGAAGAAGGAGCAG	GAAGGGGAGAGAAGAAGGAGGGAGAGGGGAAGGAGAGAAGAGGGAGGAGCGG	hap_c12	hap_c79	GG	2	NA	CC	NA	-/-
discovery	control	dog_1068	GAGAAAGAGAGGGGGAGAGGAGGGAGGGGAAGGGGAGAAGAGGGAGGAGAAG	GAGAAAGAGAGAGAGAGGAGAGGGCAAGAAAGGGGAGAAGAGAGAGGAAAAG	hap_c08	hap_c22	GG	2	NA	CC	NA	-/-
discovery	control	dog_1070	GAGAAAGAGGGAGGGGGGGAGGAGAGGGGAAAGGGGAAACGGGGAGGAACAG	GAGAAAGAGGGAGGGAGGGAGGAGAGGGGAAAGGGGAAACGGGGAGGAACAG	hap_c16	hap_c11	GG	2	NA	CC	NA	SINE/-
discovery	control	dog_1071	GAGAAAGAGGGAGGGAGGGAGGAGAGGGGAAAGGGGAAACGGGGAGGAACAG	GAGAAAGAGGGAGGAAGGGAGGAGAGGGGAAAGGGGAAACGGGGAGGAACAG	hap_c11	hap_c18	GG	2	NA	CC	NA	-/-
discovery	control	dog_1073	GAAGAGAGGAGAGGGGGGGGAGAGCGGGGAAGGGGAGAACGGGGAGGCGAAA	ATGAAAGAGGGGGGGAGGAGAGGGAGGAAAAGAAGAGAACGGGGAGGAGCGG	hap_c58	hap_c28	GG	2	0	CC	NA	SINE/SINE
discovery	control	dog_1075	GAGAAAGAGAGGGGGGGGGGAGAGAGGAAAAGAAGGGAAGAGGGAGGAGCAG	GAGAAAGAGGGAGGGGGGGAGGAGAGGGGAAAGGGGAAACGGGGAGGAACAG	hap_c30	hap_c16	GG	2	0	CC	NA	-/-
discovery	control	dog_1076	GAGAAGGAGAGAAGAAGGAGGGAGAGGGAAAGGGGAGAAGGGGGAGAAGCGG	GAGAAAGAGAGAGGGGGGGAGGAGAGGAAAAGGAGGGAAGGAGGAGGCACAA	hap_c68	hap_c56	GG	2	NA	CC	NA	SINE/SINE
discovery	control	dog_1077	GAGAAAGAGAGGGGGGGGGGAGAGAGGAAAGGGAGAGAAGAGGGAGGAGCGG	GAAAAAAAGGGGGGGGGGAGGGGGAGGGGAAGAAGAGAAGAAGAAGGAGCAG	hap_c53	hap_c01	GG	2	NA	CC	NA	-/-
discovery	control	dog_1078	GAGAAAGAGAGGGGGGGGGGAGAGAGGAAAAGGAGGGAAGAGGGAGGAGCAG	GAAAAAAAGGGGGGGGGGAGGGGGAGGGGAAGAAGAGAAGAAGAAGGAGCAG	hap_c04	hap_c01	GG	2	NA	CC	NA	SINE/-
discovery	control	dog_1079	GAAGGGGAGAGAAGAAGGAGGGAGAGGGGAAGGGAGGGACGGGGAGGAACAA	GAGAAAGAGGGAGGAAGGGAGGAGAGGGGAAAGGGGAAACGGGGAGGAACAG	hap_c23	hap_c18	GG	2	NA	CC	NA	-/-
discovery	control	dog_1083	GAAAAAAAGGGGGGGGGGAGGGGGAGGGGAAGAAGAGAAGAAGAAGGAGCAG	GAAGGGGAGAGAAGAAGGAGGGAGAGGGGCAGGAGGGAAGAGGGAGGAGCAG	hap_c01	hap_c15	GG	2	NA	CC	NA	-/-
discovery	control	dog_1084	GAAAAAAAGGGGGGGGGGAGGGGGAGGGGAAGAAGAGAAGAAGAAGGAGCAG	GAGAAAGAGAGGGGGGGGGGAGAGAGGAAAAGGAGGGAAGAGGGAGGAGCAG	hap_c01	hap_c04	GG	2	NA	CC	NA	-/-
discovery	control	dog_1086	GAAAAAAAGGAGGGAAGGAGGGGGAGGAGAAGGAGAGGGGGAGAAGGAGCAG	GAAGGGGAGGGGAGAAGGGGAGAGAGGGGAGGGGGAGAAGGGGGAGGAGCGG	hap_c92	hap_c57	GG	2	NA	CC	NA	SINE/SINE
discovery	control	dog_1087	GAAAAAGAGAGAGGGGGAAAAAGGAGGGGAAAGGAAGAAGAGGGAGGAGCGG	GAAAAAGAGAGAGGGGGAAAAAGGAGGGGAAAGGAAGAAGAGGGAGGAGCGG	hap_c21	hap_c21	GG	2	0	CC	CC	SINE/SINE
discovery	control	dog_1095	GAAAAAAAGAGGGGGGGGAGGGGGAGGGGAAGAAGAGAAGAAGAAGGAGCAG	GAAGAGAGAAGGGAGAGGAGAGGGCGAAGCAGAAGAAAAGGGGGAGGAGCAG	hap_c12	hap_c168	GG	2	0	CC	CC	-/-
discovery	control	dog_1096	GAGAAAGAGAGAGGGGGGGGAAGGAGGGGAAAGGAAGAAGAGGGAGGAGAAG	GAGAAAGAGAGAGGGGGGGGAAGGCGAAGAAGAAGAGAAGGAGAAGGAGCAG	hap_c33	hap_c137	GG	2	NA	CC	NA	SINE/SINE
discovery	control	dog_1097	GAGAAAGAGAGAGGGGGAAGGGAGCGAAGAAGGAGAGAAGAAGGAGGCACAA	GAAAAAGAGAGAGGGGGGAAAGAGAGGAGAAGGGGAGAAGGAGGAGGAGCAG	hap_c141	hap_c195	GG	2	NA	CC	NA	SINE/SINE
discovery	control	dog_1099	GAGAAAGAGGGAGGGAGGGAGGAGAGGGGAAAGGGGAAACGGGGAGGAACAG	GAGAAAGAGGGAGGGAGGGAGGAGAGGGGAAAGGGGAAACGGGGAGGAACAG	hap_c11	hap_c11	GG	2	NA	CC	NA	-/-
discovery	control	dog_1102	GAGAAAGAGAGGGGGGGGGGAGAGAGGAAAAGGAGGGAAGAGGGAGGAGCAG	GAAAAAAAGGAGGGGGGGGGAGGGCGAAGAAGGAGGGGAGGGGGAGAAGCGG	hap_c04	hap_c07	GG	2	NA	CC	NA	-/-
discovery	control	dog_1103	GAGAAAGAGAGAGGGGGGGGAGGGAGGAAAGGAAGAGGGGGGGGAGAAGCGG	GAGAAAGAGAGAGAGAGGAGAGAGCGAAGCAAGGGAGAAGAGGGAGGAGCAG	hap_c132	hap_c146	GG	2	NA	CC	NA	SINE/SINE
discovery	control	dog_1104	GAAGGGGAGAGAAGAAGGAGGGAGCGAAGAAGGAGGGGAGGGGGAGGAGAAG	GAAAAAAAGGGGGGGGGGAGGGGGAGGGGAAGAAGAGAAGAAGAAGGAGCAG	hap_c152	hap_c01	GG	2	NA	CC	NA	SINE/-
discovery	control	dog_1105	ATAAAAAAGGAGGGGGGGGGAGAACGAAGCAAGGAGGGGCGGGGAGGAACAG	ATAAAAAAGGAGGGGGGGGGAGAACGAAGCAAGGAGGGGCGGGGAGGAACAG	hap_c100	hap_c100	GG	2	NA	CC	NA	-/-
discovery	control	dog_1107	GAGAAAGAGGGAGGGGGGGAGGAGAGGGGAAAGGGGAAACGGGGAGGAACAG	GAGAAAGAGAGGGGGGGGGGAGAGAGGAAAAGAAGGGAAGAGGGAGGAGCAG	hap_c16	hap_c30	GG	2	NA	CC	NA	SINE/-
discovery	control	dog_1108	GAAAAAGAGAGGGGGAGGGGAGGGAGGAGAAGAGGAGGACGGGGAGGAGCAG	GAAAAAGAGAGGGGAAGGAGGGAAAGGAGAAGGGGAGAAGGGGAAGGAGCAG	hap_c05	hap_c02	GG	2	0	CC	NA	-/-
discovery	control	dog_1111	GAAAAAGAGAGGGGAAGGAGGGAAAGGAGAAGGGGAGAAGGGGAAGGAGCAG	GAAAAAGAGAGGGGGAGGGGAGGGAGGAGAAGAGGAGGACGGGGAGGAGCAG	hap_c02	hap_c05	GG	2	NA	CC	NA	-/-
discovery	control	dog_1113	GAGAAAGAGAGAGGGGGGGGAGAGCGAAAAAGGGAAGAAGGGAGAGGAACAA	GAAGAGAGGAGGAGAAGGAGAGGGAGGAGCAGGAGAGAAGAAGAGAAAACAA	hap_c14	hap_c06	GG	2	NA	CC	NA	-/-
discovery	control	dog_1115	GAGAAAGAGAGGGGGAGAGGAGGGAGGGGAAGGGGAGAAGAGGGAGGAGAAG	ATGAAAGAGAGAGGGGGGGGGGGGAGGAAAGGGAGAGAAGAGGGAGGAGCGG	hap_c08	hap_c03	GG	2	NA	CC	NA	-/-
discovery	control	dog_1116	GAGAAAGAGAGGGGGGGGGGAGAGAGGAAAAGGAGGGAAGAGGGAGGAGCAG	GAGAAAGAGAGAGGGGGGGGAGAGAGGAGAAGGAGGGGAGAGGGAGGAGAAG	hap_c04	hap_c136	GG	2	NA	CC	NA	SINE/-
discovery	control	dog_1123	ATGAAAGAGAGAGGGGGGGGGGGGAGGAAAGGGGAAGAAGGAGAAGGAGAAG	GAGAAAGAGAGGGGGAGAGGAGGGAGGGGAAGAAGAGAAGAAGAAGGAGCAG	hap_c37	hap_c126	GG	2	NA	CC	NA	-/-
discovery	control	dog_1126	ATAAAAGAGAGGGGGAGAAAGGGGAGGAGAAGGAGGGAAGGGGAAGGAACGG	GAGAAAGAGAGAGAGAGGAGAGGGCAAGAAAGGGGAGAAGAGAGAGGAAAAG	hap_c09	hap_c22	GG	2	NA	CC	NA	-/-
discovery	control	dog_1129	GAAAAAAAGGGGGGGGGGAGGGGGAGGGGAAGAAGAGAAGAAGAAGGAGCAG	GAAAAAAAGGGGGGGGGGAGGGGGAGGGGAAGAAGAGAAGAAGAAGGAGCAG	hap_c01	hap_c01	GG	2	NA	CC	NA	-/-
discovery	control	dog_1130	GAAAAAAAGGAGGGGGGGGGAGAGCAAGGCAGAAGAGGGCGAGGAGGAACAA	GAAAAAAAGGAGGAGAGGAGAGGGAGGGGAAGGAGGGGAGAGGAAGGAACGG	hap_c35	hap_c215	GG	2	NA	CC	NA	-/-
discovery	control	dog_1132	GAAAAAGAGAGGGGAAGGAGGGAAAGGAGAAGGGGAGAAGGGGAAGGAGCAG	ATGAAAGAGAAAGAGAGGAGAGGGAGGAAAAGGGGAGAAGAGGGAGGAGCAG	hap_c02	hap_c27	GG	2	NA	CC	NA	-/-
discovery	control	dog_1133	GAAGAGAGGAGGAGAAGGAGAGGGAGGAGCAGGAGAGAAGAAGAGAAAACAA	GAAGAGAGGAGGAGAAGGAGAGGGAGGAGCAGGAGAGAAGAAGAGAAAACAA	hap_c06	hap_c06	GG	2	0	CC	NA	-/-
discovery	control	dog_1136	GAGAAAGAGAGGGGGAGAAGGGGGAGGGGAAGAGGAGAAGAGGGAGGAGCGG	GAAAAAAAGGGGGGGGGGAGGGGGAGGGGAAGAAGAGAAGAAGAAGGAGCAG	hap_c72	hap_c01	GG	2	NA	CC	NA	-/-
discovery	control	dog_1141	GAGAAAGAGAGGGGGAGAGGAGGGAGGGGAAGGGGAGAAGAGGGAGGAGAAG	GAGAAAGAGGGAGGGAGGGAGGAGAGGGGAAAGGGGAAACGGGGAGGAACAG	hap_c08	hap_c11	GG	2	NA	CC	NA	-/-
discovery	control	dog_1142	GAAAAAAAGGAGGGGGGGGGAGAGAGGAAAAGGAGAGAAGAGGGAAGAGCAG	GAGAAAAAGGAGGGGGGGGGAGAGAGGAAAAGGAGAGAAGAGGGAAGAGCAG	hap_c206	hap_c41	GG	2	0	CC	CC	-/-
discovery	control	dog_1143	GAAGAGAGGAGGAGAAGGAGAGGGAGGAGCAGGAGAGAAGAAGAGAAAACAA	ATGAAAGAGAGAGGGGGGGGGGGGAGGAAAGGGAGAGAAGAGGGAGGAGCGG	hap_c06	hap_c03	GG	2	NA	CC	NA	-/-
discovery	control	dog_1144	GAGAAAGAGAGAGAGAGGAGAGGGCAAGAAAGGGGAGAAGAGAGAGGAAAAG	GAAAAAAAGGAGGGGGGGGGAGAGCAAGGCAGAAGAGGGCGAGGAGGAACAA	hap_c22	hap_c35	GG	2	NA	CC	NA	-/-
discovery	control	dog_1145	GAAAAAGAGAGGGGGAGGGGAGGGAGGAGAAGAGGAGGACGGGGAGGAGCAG	GAAAAAAAGGAGGGGGGGGGAGGGCGAAGAAGGAGGGGAGGGGGAGGAGAAG	hap_c05	hap_c10	GG	2	NA	CC	NA	SINE/-
discovery	control	dog_1151	GAAAAAGAGAGAGGGGGGAAAGAGAGGAGAAGGGGAAAAGGAGGAGGAGCGG	GAAGGGGAGGGGAGAAGGGGAGAGAGGGGAGGGGGAGAAGGGGGAGGAGCGG	hap_c197	hap_c57	GG	2	NA	CC	NA	SINE/SINE
discovery	control	dog_1152	GAAAAAAAGGAGGGGGGGGGAGGGCGAAGAAGGAGGGGAGGGGGAGAAGCGG	GAGAAAGAGAGGGGGGGGGGAGAGAGGAAAAGGAGGGAAGAGGGAGGAGCAG	hap_c07	hap_c04	GG	2	NA	CC	NA	-/-
discovery	control	dog_1157	ATGAAAGAGAAAGAGAGGAGAGGGAGGGGAGGGGGAGAAGGGGGAGGAGCAG	GAGAAAGAGAGGGGGAGAGGAGGGAGGGGAAGGGGAGAAGAGGGAGGAGAAG	hap_c25	hap_c08	GG	2	NA	CC	NA	-/-
discovery	control	dog_1159	GAAAAAAAGAGGGGGGGGAGGGGGAGGGGAAGAAGAGAAGAAGAAGGAGCAG	GAAGAGAGAAGGGAGAGGAGAGGGCGAAGCAGAAGAAAAGAGGGAGGAGCGG	hap_c12	hap_c169	GG	2	NA	CC	NA	SINE/-
discovery	control	dog_1164	GAAAAAAAGGAGGGGGGGGGAGAACGAGGAAGGGGAAGAGAGGGAGGAGCAG	GAAGGGGAGGGGAGGAGGAGAAGGAGGAGAAAGGGAGAAGGGGGAGGCGAAG	hap_c207	hap_c150	GG	2	0	CC	CT	SINE/SINE
discovery	control	dog_1166	GAAAAAAAGAGGGGGGGGAGGGGGAGGGGAAGAAGAGAAGAAGAAGGAGCAG	GAAAAAAAGAGGGGGGGGAGGGGGAGGGGAAGAAGAGAAGAAGAAGGAGCAG	hap_c12	hap_c12	GG	2	NA	CC	NA	-/-
discovery	control	dog_1167	GAGAAAGAGGGAGGGGGGGAGGAGAGGGGAAAGGGGAAACGGGGAGGAGAAG	GAAAAAAAGAGGGGGGGGAGGGGGAGGGGAAGAAGAGAAGAAGAAGGAGCAG	hap_c115	hap_c12	GG	2	NA	CC	NA	-/-
discovery	control	dog_1168	GTGAAAGAGAGAGGGAGAAGAGAGCGGAAAAGAAGGGGAGGGGAAGGAAAAG	ATGAAGAAGGGGGGGGGGGGAGGGCGAAGAAGGAGGGAAGAGGGAGGAGCGG	hap_c13	hap_c217	GG	2	NA	CC	NA	-/-
discovery	control	dog_1171	ATGAAAGAGAGAGGGGGGGGGGGGAGGAAAGGGAGAGAAGAGGGAGGAGCGG	GAGAAAGAGAGAGGGGGGGGAGAGCGAAAAAGGGAAGAAGGGAGAGGAACAA	hap_c03	hap_c14	GG	2	NA	CC	NA	-/-
discovery	control	dog_1172	GAAGAGAAGAGAGGAAGGGGAGAGAGGGGAGGGGGAGAACGGGGAGAAGCAG	GAAGGGGAGAGAAGAAGGAGGGAGAGGGGAAGAAGAGAAGGGGGAGGAGCAA	hap_c48	hap_c80	GG	2	NA	CC	NA	SINE/SINE
discovery	control	dog_1173	GTGAAAGAGAGAGGGAGAAGAGAGAGGGGAAGGGAAGAAGAGGGAGGAGCAA	GAGAAAGAGGGAGGGAGGGAGGAGAGGGGAAAGGGGAAACGGGGAGGAACAG	hap_c103	hap_c11	GG	2	NA	CC	NA	-/-
discovery	control	dog_1176	GAAAAAAAGGGGGGGGGGAGGGGGAGGGGAAGAAGAGAAGAAGAAGGAGCAG	GAAAAAAAGGGGGGGGGGAGGGGGAGGGGAAGAAGAGAAGAAGAAGGAGCAG	hap_c01	hap_c01	GG	2	0	CC	NA	-/-
discovery	control	dog_1177	GAGAAAGAGAGGGGGGGGGGAGAGAGGAAAAGGAGGGAAGAGGGAGGAGCAG	GAAAAAAAGGAGGGGGGGGGAGGGCGAAGAAGGAGGGGAGGGGGAGAAGCGG	hap_c04	hap_c07	GG	2	NA	CC	NA	SINE/-
discovery	control	dog_1179	GAAAAAGAGAGAGGGGGGAAAGAGAGGAGAAGGGGAGAACGGGGAGAAGCGG	GAAAAAAAGGGGGGGGGGAGGGGGAGGGGAAGAAGAGAACGGGGAGGAGCAG	hap_c17	hap_c200	GG	2	0	CC	NA	-/-
discovery	control	dog_1184	ATAAAAGAGAGGGGGAGAAAGGGGAGGAGAAGGAGGGAAGGGGAAGGAACGG	GAAGAGAGAAGGGAGAGGAGAGAGAGGAAAAGAAGAGAACGGGGAGGAGAAG	hap_c09	hap_c171	GG	2	NA	CC	NA	-/-
discovery	control	dog_1186	GAAAAAAAGAGGGGGGGGAGGGGGAGGGGAAGAAGAGAAGAAGAAGGAGCAG	GAAAAAAAGAGGGGGGGGAGGGGGAGGGGAAGAAGAGAAGAAGAAGGAGCAG	hap_c12	hap_c12	GG	2	NA	CC	NA	SINE/-
discovery	control	dog_1187	GAAAAAGAGAGGGGAAGGAGGGAAAGGAGAAGGGGAGAAGGGGAAGGAGCAG	GAAAAAGAGAGGGGGAGGGGAGGGAGGAGAAGAGGAGGACGGGGAGGAGCAG	hap_c02	hap_c05	GG	2	NA	CC	NA	-/-
discovery	control	dog_1190	GAGGAGAAGAGAGGGGGGGGAGAGAGGGGAGGGGGAGAAGGGGGAGGAGCGG	GAGAAAGAGAGAGGGGGGGGAGAGAGGGGAAGGAGAAGAGAGGGGAAAGCGG	hap_c109	hap_c55	GG	2	NA	CC	NA	SINE/SINE
discovery	control	dog_1191	GAAAAAAAGAGGGGGGGGAGGGGGAGGGGAAGAAGAGAAGAAGAAGGAGCAG	GTGAAGAAGGGGGGAAGGAGAAGGAGGGGAAGGGGAGAAGAGGAAGGAAAAG	hap_c12	hap_c32	GG	2	NA	CC	NA	-/-
discovery	control	dog_1192	GAGAAAGAGGGAGGAAGGGAGGAGAGGGGAAAGGGGAAACGGGGAGGAACAG	GTGAAGAAGGGGGGAAGGAGAAGGAGGGGAAGGGGAGAAGAGGAAGGAAAAG	hap_c18	hap_c32	GG	2	NA	CC	NA	-/-
discovery	control	dog_1198	ATGAAAGAGAAAGAGAGGAGAGGGAGGGGAGGGGGAGAAGGGGGAGGAGCAG	ATAAAAGAGAGGGGGAGAAAGGGGAGGAAAGGGAGAGAAGAGGGAGGAGCGG	hap_c25	hap_c99	GG	2	0	CC	NA	-/-
discovery	control	dog_1199	GAAGAGAAGAGAGGAAGGGGAGAGAGGGGAGGGGGAGAAGAGAGAGGAAAAG	GAGAAAGAGAGGAGGGGAAAAGAGAGGGGAAGAAGAAAACGAGAAGGAGCAG	hap_c24	hap_c73	GG	2	NA	CC	NA	SINE/SINE
discovery	control	dog_1200	GAGAAAGAGAGGGGGAGAGGAGGGAGGGGAAGGGGAGAAGAGGGAGGAGAAG	GAGAAAGAGAGGGGGAGAGGAGGGAGGGGAAGGGGAGAAGAGGGAGGAGAAG	hap_c08	hap_c08	GG	2	NA	CC	NA	-/-
discovery	control	dog_1207	GAAAAAGAGAGGGGAAGGAGGGAAAGGAGAAGGGGAGAAGGGGAAGGAGCAG	GAAGAGAGGAGGAGAAGGAGAGGGAGGAGCAGGAGAGAAGAAGAGAAAACAA	hap_c02	hap_c06	GG	2	NA	CC	NA	-/-
discovery	control	dog_1211	GAGAAAGAGAGGGGGGGGGGAGAGAGGAAAAGAAGGGAAGAGGGAGGAGCAG	GAAGAGAGGAGGAGAAGGAGAGGGAGGAGCAGGAGAGAAGAAGAGAAAACAA	hap_c30	hap_c06	GG	2	NA	CC	NA	-/-
discovery	control	dog_1226	GAAAAAAAGGGGGGGGGGAGGGGGAGGGGAAGAAGAGAAGAAGAAGGAGCAG	GAAAAAAAGGGGGGGGGGAGGGGGAGGGGAAGAAGAGAAGAAGAAGGAGCAG	hap_c01	hap_c01	GG	2	NA	CC	NA	-/-
discovery	control	dog_1230	GAGAAAGAGAGGGGGGGGGGAGAGAGGAAAAGGAGGGAAGAGGGAGGAGCAG	GAAAAAAAGGGGGGGGGGAGGGGGAGGGGAAGAAGAGAAGAAGAAGGAGCAG	hap_c04	hap_c01	GG	2	NA	CC	NA	-/-
discovery	control	dog_1233	GAAAAAAAGGGGGGGGGGAGGGGGAGGGGAAGAAGAGAAGAAGAAGGAGCAG	GAGAAAGAGAGGGGGGGGGGAGAGAGGAAAAGGAGGGAAGAGGGAGGAGCAG	hap_c01	hap_c04	GG	2	NA	CC	NA	-/-
discovery	control	dog_1237	GAGAAAGAGAGGGGGGGGGGAGAGAGGAAAAGGAGGGAAGAGGGAGGAGCAG	GAAAAAAAGGGGGGGGGGAGGGGGAGGGGAAGAAGAGAAGAAGAAGGAGCAG	hap_c04	hap_c01	GG	2	NA	CC	NA	-/-
discovery	control	dog_1242	ATAAAAGAGAGGGGGAGAAAGGGGAGGAGAAGGAGGGAAGGGGAAGGAACGG	GAGAAAGAGGGAGGGAGGGAGGAGAGGGGAAAGGGGAAACGGGGAGGAACAG	hap_c09	hap_c11	GG	2	NA	CC	NA	-/-
discovery	control	dog_1244	GAAAAAAAGGAGGGGGGGGGAGGGCGAAGAAGGAGGGGAGGGGGAGAAGCGG	ATGAAAGAGAAAGAGAGGAGAGGGAGGAAAAGGGGAGAAGAGGGAGGAGCAG	hap_c07	hap_c27	GG	2	NA	CC	NA	-/-
discovery	control	dog_1246	GAAAAAAAGGGGGGGGGGAGGGGGAGGGGAAGAAGAGAAGAAGAAGGAGCAG	ATGAAAGAGAGAGGGGGGGGGGGGAGGGGAAGAAGAGAAGAAGAAGGAGCAG	hap_c01	hap_c60	GG	2	NA	CC	NA	-/-
discovery	control	dog_1247	GAAGGGGAGAGAAGAAGGAGGGAGAGGGGAAGGGGGAAACGGGGAGGAACAG	GAAAAAAAGGAGGGGGGGGGAGGGCGAAGAAGGAGGGGAGGGGGAGGAGAAG	hap_c42	hap_c10	GG	2	NA	CC	NA	SINE/SINE
discovery	control	dog_1249	GAAGAGAGGAGGAGAAGGAGAGGGAGGAGCAGGAGAGAAGAGGGAGGAGCAG	GAAAAAGAGAGGGGAAGGAGGGAAAGGAGAAGGGGAGAAGGGGAAGGAGCAG	hap_c164	hap_c02	GG	2	NA	CC	NA	-/-
discovery	control	dog_1252	GAAAAAAAGGAGGGGGGGGGAGGGCGAAGAAGGAGGGGAGGGGGAGAAGCGG	GAAAAAAAGGGGGGGGGGAGGGGGAGGGGAAGAAGAGAAGAAGAAGGAGCAG	hap_c07	hap_c01	GG	2	NA	CC	NA	-/-
discovery	control	dog_1256	GAAGAGGAGAGAGGGGGGGGAGAGAGGGGCAGGAGAGAAGGGGGAGGCGAAA	AAAGGGAGGAAGGGGAGAAGGGGGCAAGAAAGGGGAGAAGAGAGAGGAAAAG	hap_c163	hap_c29	GG	2	0	CC	NA	-/-
discovery	control	dog_1257	GAGAAAGAGAGGGGGAGAGGAGGGAGGGGAAGGGGAGAAGAGGGAGGAGAAG	GAAAAAGAGAGGGGGAGGAGGGGGAGGGGAGGGGGAGAAGGGGGAGGAGCAG	hap_c08	hap_c87	GG	2	NA	CC	NA	-/-
discovery	control	dog_1259	ATAGGGGAGGGGAGAAGAAAAGGACGAAAAAGGGGAGAAGGAGGAGGCACAA	GAAAAAAAGGAGGGGGGGGGAGGGCGAAGAAGGAGGGGAGGGGGAGGAGAAG	hap_c229	hap_c10	GG	2	NA	CC	NA	SINE/-
discovery	control	dog_1260	GAGAAAGAGAGAGAGAGGAGAGGGCAAGAAAGGGGAGAAGAGAGAGGAAAAG	GAAGGGAGGAAGGGGGGGGGAAAACAAGAAAGGGGAGAAGAAGGAGGAGCAG	hap_c22	hap_c43	GG	2	NA	CC	NA	-/-
discovery	control	dog_1262	GAGAAAGAGAGAGGGGGGAGAAGGAGGAGAAGGGGAGGGCGAGAAGGAGCAG	GAAAAAAAGGGGGGGGGGAGGGGGAGGGGAAGAAGAGAAGAAGAAGGAGCAG	hap_c139	hap_c01	GG	2	NA	CC	NA	-/-
discovery	control	dog_1265	GAAGAGAGGAGGAGAAGGGGGGGGAGGAAAGGGAGAGAAGAGGGAGGAGCGG	GAGAAAGAGAGAGGGGGGGGAGAGCGAAAAAGGGAAGAAGGGAGAGGAACAA	hap_c44	hap_c14	GG	2	0	CC	NA	-/-
discovery	control	dog_1266	GAGAAAGAGAGAGGGGGGGGAGAGCGAAAAAGGGAAGAAGGGAGAGGAACAA	ATGAAAGAGAGAGGGGGGGGGGGGAGGAAAGGGAGAGAAGGGGGAGAAGCGG	hap_c14	hap_c38	GG	2	0	CC	NA	-/-
discovery	control	dog_1267	GAGAAAGAGAGAGGGGGGGGAGAGCGAAAAAGGGAAGAAGGGAGAGGAACAA	ATGAAAGAGAGAGGGGGGGGGGGGAGGAAAGGGAGAGAAGAGGGAGGAGCGG	hap_c14	hap_c03	GG	2	0	CC	NA	-/-
discovery	control	dog_1268	GAGAAAGAGAGAGGGGGGGGAGAGCGAAAAAGGGAAGAAGGGAGAGGAACAA	GAAGAGAGGAGGAGAAGGAGAGGGAGGAGCAGGAGAGAAGAAGAGAAAACAA	hap_c14	hap_c06	GG	2	NA	CC	NA	-/-
discovery	control	dog_1269	GAGAAAGAGAGAGGGGGGGGAGAGCGAAAAAGGGAAGAAGGGAGAGGAACAA	GAAAAAAAGGAGGGGGGGGGAGGGCGAAGAAGGAGGGGAGGGGGAGAAGCGG	hap_c14	hap_c07	GG	2	NA	CC	NA	-/-
discovery	control	dog_1270	GAAGAGAGGAGGAGAAGGGGGGGGAGGAAAGGGAGAGAAGAGGGAGGAGCGG	GAAGAGAGGAGGAGAAGGAGAGGGAGGAGCAGGAGAGAAGAAGAGAAAACAA	hap_c44	hap_c06	GG	2	NA	CC	NA	-/-
discovery	control	dog_1271	ATGAAAGAGAGAGGGGGGGGGGGGAGGAAAGGGAGAGAAGAGGGAGGAGCGG	ATGAAAGAGAGAGGGGGGGGGGGGAGGAAAGGGAGAGAAGAGGGAGGAGCGG	hap_c03	hap_c03	GG	2	NA	CC	NA	-/-
discovery	control	dog_1272	GAAAAAAAGGAGGGGGGGGGAGGGCGAAGAAGGAGGGGAGGGGGAGAAGCGG	GAAAAAAAGGGGGGGGGGAGGGGGAGGGGAAGAAGAGAAGAAGAAGGAGCAG	hap_c07	hap_c01	GG	2	NA	CC	NA	-/-
discovery	control	dog_1273	GAAGAGAGGAGGAGAAGGAGAGGGAGGAGCAGGAGAGAAGAAGAGAAAACAA	ATGAAAGAGAGAGGGGGGGGGGGGAGGAAAGGGAGAGAAGGGGGAGAAGCGG	hap_c06	hap_c38	GG	2	NA	CC	NA	-/-
discovery	control	dog_1276	ATGAAAGAGAGAGGGGGGGGGGGGAGGAAAGGGAGAGAAGAGGGAGGAGCGG	GAAAAAGAGAGGGGGAGGGGAGGGAGGAGAAGAGGAGGACGGGGAGGAGCAG	hap_c03	hap_c05	GG	2	NA	CC	NA	-/-
discovery	control	dog_1278	GAAAAAGAGAGGGGAAGGAGGGAAAGGAGAAGGGGAGAAGGGGAAGGAGCAG	GAAAAAGAGAGGGGGAGGGGAGGGAGGAGAAGAGGAGGACGGGGAGGAGCAG	hap_c02	hap_c05	GG	2	NA	CC	NA	-/-
discovery	control	dog_1281	GAAGAGAGGAGGAGAAGGAGAGGGAGGAGCAGGAGAGAAGAAGAGAAAACAA	GAGAAAGAGAGGGGGGGGGGAGAGAGGAAAAGGAGGGAAGAGGGAGGAGCAG	hap_c06	hap_c04	GG	2	NA	CC	NA	-/-
discovery	control	dog_1282	GAAGAGAGGAGGAGAAGGAGAGGGAGGAGCAGGAGAGAAGAAGAGAAAACAA	GAAGGGGAGAGAAGAAGGAGGGAGAGGGGCAGGAGGGAAGAGGGAGGAGCAG	hap_c06	hap_c15	GG	2	NA	CC	NA	-/-
discovery	control	dog_1283	GAAAAAGAGAGGGGAAGGAGGGAAAGGAGAAGGGGAGAAGGGGAAGGAGCAG	GAGAAAGAGAGGGGGGGGGGAGAGAGGAAAAGGAGGGAAGAGGGAGGAGCAG	hap_c02	hap_c04	GG	2	0	CC	CC	-/-
discovery	control	dog_1286	ATGAAAGAGAGAGGGGGGGGGGGGAGGAAAGGGAGAGAAGAGGGAGGAGCGG	GAGAAAGAGAGGGGGGGGGGAGAGAGGAAAAGGAGGGAAGAGGGAGGAGCAG	hap_c03	hap_c04	GG	2	0	CC	CC	SINE/-
discovery	control	dog_1290	GAAAAAGAGAGGGGAAGGAGGGAAAGGAGAAGGGGAGAAGGGGAAGGAGCAG	GAAAAAGAGAGGGGGAGGGGAGGGAGGAGAAGAGGAGGACGGGGAGGAGCAG	hap_c02	hap_c05	GG	2	NA	CC	NA	-/-
discovery	control	dog_1292	ATAAAAGAGAGGGGGAGAAAGGGGAGGAGAAGGAGGGAAGGGGAAGGAACGG	GAAGGGGAGAGAAGAAGGAGGGAGAGGGGAAGGGGAGAAGAGGGGAAAGCAG	hap_c09	hap_c154	GG	2	NA	CC	NA	-/-
discovery	control	dog_1293	GTGAAAGAGAGAGGGAGAAGAGAGCGGAAAAGAAGGGGAGGGGAAGGAAAAG	GTGAAAGAGGGGGGGAGGAGGGGGAGGAGAAGGAGAAGGGAGGGGAAAGCAA	hap_c13	hap_c39	GG	2	0	CC	CC	-/-
discovery	control	dog_1294	GAAGAGAGGAGGAGAAGGAGAGGGAGGAGCAGGAGAGAAGAAGAGAAAACAA	GAAAAAGAGAGGGGGAGAAGGGGGAGGGGAAGAGGAGAAGAGGGAGGAGCGG	hap_c06	hap_c20	GG	2	NA	CC	NA	-/-
discovery	control	dog_1296	GAGAAAGAGAGGGGGGGGGGAGAGAGGAAAAGGAGGGAAGAGGGAGGAGCAG	GAGAAAGAGAGAGGGGGGGGAGGAAGGAGCAGGAGGGAAGGAGGAGGCACAA	hap_c04	hap_c133	GG	2	NA	CC	NA	-/-
discovery	control	dog_1298	GAAAAAAAGGGGGGGGGGAGGGGGAGGGGAAGAAGAGAAGAAGAAGGAGCAG	GAGAAAGAGAGGGGGGGGGGAGAGAGGAAAAGGAGGGAAGAGGGAGGAGCAG	hap_c01	hap_c04	GG	2	NA	CC	NA	-/-
discovery	control	dog_1300	GAAAAAAAGGAGGGGGGGAGAGGGCGAAGAAAGGAGGGACGAGGAGGAGCGG	ATGAAAGAGAGAGGGGGGGGGGGGAGGAAAGGGAGAGAAGAGGGAGGAGCGG	hap_c213	hap_c03	GG	2	NA	CC	NA	-/-
discovery	control	dog_1303	ATGAAAGAGAGAGGGGGGGGGGGGAGGAAAGGGAGAGAAGAGGGAGGAGCGG	GAAAAAGAGAGAGGGGGGAAAGAGAGGAGAAGGGGAGAACGGGGAGAAGCGG	hap_c03	hap_c17	GG	2	NA	CC	NA	-/-
discovery	control	dog_1304	GAAAAAGAGAGAGGGGGGAAAGAGAGGAGAAGGGGAGAACGGGGAGAAGCGG	GAGAAAGAGAGGGGGGGGGGAGAGAGGAAAAGGAGGGAAGAGGGAGGAGCAG	hap_c17	hap_c04	GG	2	NA	CC	NA	-/-
discovery	control	dog_1306	GAAAAAAAGGGGGGGGGGAGGGGGAGGGGAAGAAGAGAAGAAGAAGGAGCAG	GAGAAAGAGAGGGGGGGGGGAGAGAGGAAAAGGAGGGAAGAGGGAGGAGCAG	hap_c01	hap_c04	GG	2	NA	CC	NA	-/-
discovery	control	dog_1307	GAAGGGAGGAAGAGAAGGGGAGGGCGAAGAAGAAGAGAAGAGGGAGGAGCGG	GAAAAAGAGAGGGGGAGGGGAGGGAGGAGAAGAGGAGGACGGGGAGGAGCAG	hap_c81	hap_c05	GG	2	NA	CC	NA	-/-
discovery	control	dog_1313	ATAAAAGAGAGGGGGAGAAAGGGGAGGAGAAGGAGGGAAGGGGAAGGAACGG	ATAAAAGAGAGGGGGAGAAAGGGGAGGAGAAGGAGGGAAGGGGAAGGAACGG	hap_c09	hap_c09	GG	2	NA	CC	NA	-/-
discovery	control	dog_1320	ATGAAAGAGAGAGGGGGGGGGGGGAGGAAAGGGAGAGAAGAGGGAGGAGCGG	GAGAAAGAGAGGGGGGGGGGAGAGAGGAAAAGGAGGGAAGAGGGAGGAGCAG	hap_c03	hap_c04	GG	2	NA	CC	NA	-/-
discovery	control	dog_1324	ATGAAAGAGAGAGGGGGGGGGGGGAGGAAAGGGAGAGAAGAGGGAGGAGCGG	GAAAAAGAGAGGGGGGGGGGAGAGAGGAAAAGGAGGGAAGAGGGAGGAGCAG	hap_c03	hap_c178	GG	2	NA	CC	NA	-/-
discovery	control	dog_1332	GAAAAAAAGGGGGGGGGGAGGGGGAGGGGAAGAAGAGAAGAAGAAGGAGCAG	GAGAAAGAGGGAGGGGGGGAGGAGAGGGGAAAGGGGAAACGGGGAGGAACAG	hap_c01	hap_c16	GG	2	NA	CC	NA	-/-
discovery	control	dog_1334	GAAGGGGAGAGAAGAAGGAGGGAGAGGGGAAGGGAGGGACGGGGAGGAACAA	ATGAAAGAGAGAGGGGGGGGGGGGAGGAAAGGGGAAGAAGGAGAAGGAGAAG	hap_c23	hap_c37	GG	2	NA	CC	NA	-/-
discovery	control	dog_1335	GAGAAAGAGAGGGGGGGGGGAGAGAGGAAAAGGAGGGAAGAGGGAGGAGCAG	GAGAAAGAGAGAGGGGGGGGAGGGCGAAGAAGGAGGGGAGGGGGAGGAGAAG	hap_c04	hap_c130	GG	2	NA	CC	NA	-/-
discovery	control	dog_1338	AAAGAGAGAAGGGAGAGGAGAGGGAGGGGAAGGGGAGAAGAGAGAGGAACAG	GAAAAAAAGGGGGGGGGGAGGGGGAGGGGAAGAAGAGAAGAAGAAGGAGCAG	hap_c243	hap_c01	GG	2	NA	CC	NA	-/-
discovery	control	dog_1341	GAGAAAGAGGGAGGGAGGGGAGAGAGGGGAAGGAAGGGACGAGAAGGAGCAG	GAAAAAAAGGGGGGGGGGAGGGGGAGGGGAAGAAGAGAAGAAGAAGGAGCAG	hap_c117	hap_c01	GG	2	NA	CC	NA	-/-
discovery	control	dog_1342	GAAGAGAAGAGAGGAAGGGGAGAGAGGGGAGGGGGAGAAGAGAGAGGAAAAG	GAGAAAAAGGAGGGGGGGAAGGAGAGGAGAAGGGGAGAAGGGGGAGGAGAAA	hap_c24	hap_c19	GG	2	NA	CC	NA	SINE/SINE
discovery	control	dog_1344	GAAAAAAAGGAGGGGGGGGGAGGGCGAAGAAGGAGGGGAGGGGGAGAAGCGG	GAAAAAAAGGGGGGGGGGAGGGGGAGGGGAAGAAGAGAAGAAGAAGGAGCAG	hap_c07	hap_c01	GG	2	NA	CC	NA	-/-
discovery	control	dog_1345	GAAGAGAGGAGGAGAAGGAGAGGGAGGAGAAGGAGAAGGGAGGGGAAAGCAA	GAAAAAGAGGGGAGAAGGAAAGAGAGGGGAAGGAGGGAAGGGGAAGGAGCAG	hap_c45	hap_c177	GG	2	NA	CC	NA	SINE/SINE
discovery	control	dog_1348	GAAAAAAAGGGGGGGGGGAGGGGGAGGGGAAGAAGAGAAGAAGAAGGAGCAG	GAAAAAAAGGGGGGGGGGAGGGGGAGGGGAAGAAGAGAAGAAGAAGGAGCAG	hap_c01	hap_c01	GG	2	NA	CC	NA	-/-
discovery	control	dog_1349	GAAAAAAAGGGGGGGGGGAGGGGGAGGGGAAGAAGAGAAGAAGAAGGAGCAG	GAGAAAGAGAGGGGGGGGGGAGAGAGGAAAAGGAGGGAAGAGGGAGGAGCAG	hap_c01	hap_c04	GG	2	NA	CC	NA	-/-
discovery	control	dog_1350	GAAAAAGAGAGGGGGAGGGGAGGGAGGAGAAGAGGAGGACGGGGAGGAGCAG	GAGAAAGAGAGAGGGGGGGGAGGAAGGAGAAGGGGAGAAGGGGGAGAAGCAG	hap_c05	hap_c31	GG	2	0	CC	CC	-/-
discovery	control	dog_1351	GAAAAAAAGGGGGGGGGGAGGGGGAGGGGAAGAAGAGAAGAAGAAGGAGCAG	GAGAAAAAGGAGGGGGGGGGAGAGAGGAAAAGGAGAGAAGAGGGAAGAGCAG	hap_c01	hap_c41	GG	2	NA	CC	NA	-/-
discovery	control	dog_1352	GAAAAAGAGAGAGGGGGGAAAGAGAGGAGAAGGGGAGAACGGGGAGAAGCGG	GAAAAAGAGAGGGGAAGGAGGGAAAGGAGAAGGGGAGAAGGGGAAGGAGCAG	hap_c17	hap_c02	GG	2	NA	CC	NA	SINE/-
discovery	control	dog_1353	GAAAAAGAGAGAGGGGGGAAAGAGAGGAGAAGGGGAGAACGGGGAGGAGCGG	GAAAAAAAGGGGGGGGGGAGGGGGAGGGGAAGAAGAGAAGAAGAAGGAGCAG	hap_c196	hap_c01	GG	2	NA	CC	NA	-/-
discovery	control	dog_1354	GAGAAAGAGAGAGGGGGGGGAGAGCGAAAAAGGGAAGAAGGGAGAGGAACAA	ATGAAAGAGAGAGGGGGGGGGGGGAGGAAAGGGAGAGAAGAGGGAGGAGCGG	hap_c14	hap_c03	GG	2	NA	CC	NA	-/-
discovery	control	dog_1355	GAAAAAGAGAGGGGAAGGAGGGAAAGGAGAAGGGGAGAAGGGGAAGGAGCAG	GAAAAAGAGAGGGGGAGGGGAGGGAGGAGAAGAGGAGGACGGGGAGGAGCAG	hap_c02	hap_c05	GG	2	NA	CC	NA	-/-
discovery	control	dog_1356	GAGAAAGAGAGGGGGAGAGGAGGGAGGGGAAGGGGAGAAGAGGGAGGAGAAG	ATAAAAGAGAGGGGGAGAAAGGGGAGGAGAAGGAGGGAAGGGGAAGGAACGG	hap_c08	hap_c09	GG	2	NA	CC	NA	-/-
discovery	control	dog_1357	ATAAAAGAGAGGGGGAGAAAGGGGAGGAGAAGGAGGGAAGGGGAAGGAACGG	GAGAAAGAGGGAGGGAGGGAGGAGAGGGGAAAGGGGAAACGGGGAGGAACAG	hap_c09	hap_c11	GG	2	NA	CC	NA	-/-
discovery	control	dog_1359	GAGAAAGAGAGAGGGGGGGGAGAGAGGGGCAGGAGAGAAGGGGGAGGCGAAA	GAGAAAAAGGAGGGGGGGAAGGAGAGGAGAAGGGGAGAAGGGGGAGGAGAAA	hap_c54	hap_c19	GG	2	0	CC	NA	SINE/SINE
discovery	control	dog_1360	ATGAAAGAGAGAGGGGGGGGGGGGAGGAAAGGGAGAGAAGAGGGAGGAGCGG	GAGAAAGAGAGAGGGGGGGGAGAGCGAAAAAGGGAAGAAGGGAGAGGAACAA	hap_c03	hap_c14	GG	2	NA	CC	NA	-/-
discovery	control	dog_1364	GAAAAAGAGAGAGGGGGAAAAAGGAGGGGAAAGGAAGAAGAGGGAGGAGCGG	GAAAAAGAGAGAGGGGGAAAAAGGAGGGGAAAGGAAGAAGAGGGAGGAGCGG	hap_c21	hap_c21	GG	2	NA	CC	NA	SINE/SINE
discovery	control	dog_1367	ATGAAAGAGAGAGGGGGGGGGGGGAGGAAAGGGAGAGAAGAGGGAGGAGCGG	GAAAAAAAGGGGGGGGGGAGGGGGAGGGGAAGAAGAGAAGAAGAAGGAGCAG	hap_c03	hap_c01	GG	2	NA	CC	NA	-/-
discovery	control	dog_1371	GAAAAAGAGAGGGGAAGGAGGGAAAGGAGAAGGGGAGAAGGGGAAGGAGCAG	GAGGGGGAGGGGAGAAGGAAGGGGAGGAGAAGGGAGGGGCGGGGAGGAGCGG	hap_c02	hap_c105	GG	2	NA	CC	NA	-/-
discovery	control	dog_1375	GAAAAAGAGAGGGGAAGGAGGGAAAGGAGAAGGGGAGAAGGGGAAGGAGCAG	GAAGGGGAGAGAAGAAGGAGGGAGAGGGGCAGGAGGGAAGAGGGAGGAGCAG	hap_c02	hap_c15	GG	2	0	CC	CC	SINE/-
discovery	control	dog_1377	GAAGGGGAGGGGAGAAGGGGAGAGAGGGGAGGGGGAGAAGGGGGAGGAGCAG	ATGAAAGAGAGAGGGGGGGGGGGGAGGAAAGGGGAAGAAGGAGAAGGAGAAG	hap_c26	hap_c37	GG	2	NA	CC	NA	-/-
discovery	control	dog_1379	GAAAAAGAGAGGGGAAGGAGGGAAAGGAGAAGGGGAGAAGGGGAAGGAGCAG	GAAAAAGAGAGGGGAAGGAGGGAAAGGAGAAGGGGAGGACGGGGAGGAGCAG	hap_c02	hap_c192	GG	2	0	CC	NA	-/-
discovery	control	dog_1381	GAAAAAAAGGGGGAGAGGAGAGGGAGGAGAAGGGGAGAAGAGGGAGGAACAA	GAGAAAGAGAGAGGGGGGGGAGGGAGGAAAGGGGGAGAAGGAGGAAGCGCGG	hap_c202	hap_c75	GG	2	NA	CC	NA	-/-
discovery	control	dog_1386	GAGAAAGAGAGGGGGGGGGGAGAGAGGAAAAGGAGGGAAGAGGGAGGAGCAG	GAAAAAGAGAGGGGGAGGGGAGGGAGGAGAAGAGGAGGACGGGGAGGAGCAG	hap_c04	hap_c05	GG	2	NA	CC	NA	-/-
discovery	control	dog_1391	GAAAAAAAGGAGGGGGGGGGAGAGCAAGGCAGAAGGGGAGGGGAAGGAAAAG	GAGAAAGAGGGAGGGGGGGAGGAGAGGGGAAAGGGGAAACGGGGAGGAACAG	hap_c204	hap_c16	GG	2	NA	CC	NA	-/-
discovery	control	dog_1395	GAAAAAAAGGGGGGGGGGAGGGGGAGGGGAAGAAGAGAAGAAGAAGGAGCAG	GTGAAAGAGAGAGGGAGAAGAGAGCGGAAAAGAAGGGGAGGGGAAGGAAAAG	hap_c01	hap_c13	GG	2	NA	CC	NA	-/-
discovery	control	dog_1406	ATAAAAGAGAGGGGGAGAAAGGGGAGGAGAAGGAGGGAAGGGGAAGGAACGG	GAGAAAGAGAGAGAGAGGAGAGGGCAAGAAAGGGGAGAAGAGAGAGGAAAAG	hap_c09	hap_c22	GG	2	NA	CC	NA	-/-
discovery	control	dog_1407	GAAAAAAAGGGGGGGGGGAGGGGGAGGGGAAGAAGAGAAGAAGAAGGAGCAG	GAGAAAGAGAGAGGGGGGGGAGAGCGAAAAAGGGAAGAAGGGAGAGGAACAA	hap_c01	hap_c14	GG	2	NA	CC	NA	-/-
discovery	control	dog_1408	GAAAAAAAGGGGGGGGGGAGGGGGAGGGGAAGAAGAGAAGAAGAAGGAGCAG	GAAAAAGAGAGGGGAAGGAGGGAAAGGAGAAGGGGAGAAGGGGAAGGAGCAG	hap_c01	hap_c02	GG	2	NA	CC	NA	-/-
discovery	control	dog_1410	GAAAAAGAGAGGGGAAGGAGGGAGCGAAGAAGGAGGGGAGGGGGAGAAGCGG	GAAAAAAAGGGGGGGGGGAGGGGGAGGGGAAGAAGAGAAGAAGAAGGAGCAG	hap_c189	hap_c01	GG	2	NA	CC	NA	-/-
discovery	control	dog_1413	ATAAAAGAGAGGGGGAGAAAGGGGAGGAGAAGGAGGGAAGGGGAAGGAACGG	GAAGGGGAGGGGAGAAGGGGAGAGAGGGGAGGGGGAGAAGGGGGAGGAGCAG	hap_c09	hap_c26	GG	2	NA	CC	NA	-/-
discovery	control	dog_1417	GAAAAAAAGGGGGGGGGGAGGGGGAGGGGAAGAAGAGAAGAAGAAGGAGCAG	GAAAAAGAGAGGGGGAGGGGAGGGAGGAGAAGAGGAGGACGGGGAGGAGCAG	hap_c01	hap_c05	GG	2	NA	CC	NA	-/-
discovery	control	dog_1419	GAAAAAAAGGAGGGGGGGAGAGGGCGAAGAAGAAGAGAAGAGGGAGGAGCGG	GAGAAAGAGGGAGGGGGGGAGGAGAGGGGAAAGGGGAAACGGGGAGGAACAG	hap_c36	hap_c16	GG	2	NA	CC	NA	-/-
discovery	control	dog_1423	GAGAAAGAGAGGGGGAGAGGAGGGAGGGGAAGGGGAGAAGAGGGAGGAGCAG	GAGAAAGAGGGAGGGAGGGAGGAGAGGGGAAAGGGGAAACGGGGAGGAACAG	hap_c124	hap_c11	GG	2	NA	CC	NA	-/-
discovery	control	dog_1425	ATGAAAGAGAAAGAGAGGAGAGGGAGGAAAAGGGGAGAAGAGGGAGGAGCAG	GAAAAAAAGGAGGGGGGGGGAGGGCGAAGAAGGAGGGGAGGGGGAGAAGCGG	hap_c27	hap_c07	GG	2	NA	CC	NA	-/-
discovery	control	dog_1430	ATGAAAGAGAGAGGGGGGGGGGGGAGGGGAAGAAGAGAAGAAGAAGGAGCAG	GAAAAAAAGGGGGGGGGGAGGGGGAGGGGAAGAAGAGAAGAAGAAGGAGCAG	hap_c60	hap_c01	GG	2	NA	CC	NA	-/-
discovery	control	dog_1431	GAAGGGGAGAGAAGAAGGAGGGAGAGGGGCAGGAGGGAAGAGGGAGGAGCAG	GAAGAGAGGAGGAGAAGGAGAGGGAGGAGCAGGAGAGAAGAAGAGAAAACAA	hap_c15	hap_c06	GG	2	NA	CC	NA	-/-
discovery	control	dog_1434	GAGAAAGAGAGGGGGAGAGGAGGGAGGGGAAGGGGAGAAGAGGGAGGAGAAG	GAAAAAAAGAGGGGGGGGAGGGGGAGGGGAAGAAGAGAAGAAGAAGGAGCAG	hap_c08	hap_c12	GG	2	NA	CC	NA	SINE/-
discovery	control	dog_1439	GAAAAAAAGGGGGGGGGGAGGGGGAGGGGAAGAAGAGAAGAAGAAGGAGCAG	GAAAAAAAGGGGGGGGGGAGGGGGAGGGGAAGAAGAGAAGAAGAAGGAGCAG	hap_c01	hap_c01	GG	2	NA	CC	NA	-/-
discovery	control	dog_1440	GTGAAAGAGGGGGGGAGGAGGGGGAGGAGAAGGAGAAGGGAGGGGAAAGCAA	GAAGGGGAGGGGAGAAGGGGAGAGAGGGGAGGGGGAGAAGGGGGAGGAGCAG	hap_c39	hap_c26	GG	2	NA	CC	NA	-/-
discovery	control	dog_1441	GAAGAGAAGAGAGGGGGAAGAGAGAGGGGAAGGGGGGAAGGGGGAGGAGCGG	GAAAAAGAGAGAGGGGGAAAAAGGAGGGGAAAGGAAGAAGAGGGAGGAGCGG	hap_c84	hap_c21	GG	2	NA	CC	NA	SINE/-
discovery	control	dog_1442	GAAGAGAGAAGGGGGGGGAGAAAAAGGGGAAGGGGGGGAGGGGGAGGAGAAG	GAAGAGAGAAGGGGGGGGAGAAAAAGGGGAAGGGGGGGAGGGGGAGGAGAAG	hap_c46	hap_c46	GG	2	NA	CC	NA	SINE/SINE
discovery	control	dog_1443	GAGAAAGAGGGAGGAAGGGAGGAGAGGGGAAAGGGGAAACGGGGAGGAACAG	GAGAAAGAGGGAGGGGGGGAGGAGAGGGGAAAGGGGAAACGGGGAGGAACAG	hap_c18	hap_c16	GG	2	NA	CC	NA	-/-
discovery	control	dog_1446	GAAAAAAAGGGGGGGGGGAGGGGGAGGGGAAGAAGAGAAGAAGAAGGAGCAG	GAAAAAAAGGGGGGGGGGAGGGGGAGGGGAAGAAGAGAAGAAGAAGGAGCAG	hap_c01	hap_c01	GG	2	NA	CC	NA	-/-
discovery	control	dog_1451	GAAAAAGAGAGGGGGAGGGGAGGGAGGAGAAGAGGAGGACGGGGAGGAGCAG	GAAAAAGAGAGGGGGAGGGGAGGGAGGAGAAGAGGAGGACGGGGAGGAGCAG	hap_c05	hap_c05	GG	2	NA	CC	NA	SINE/-
discovery	control	dog_1452	GAGAAAGAGAGAGGGGGGGGAGAGCGAAAAAGGGAAGAAGGGAGAGGAACAA	ATGAAAGAGAGAGGGGGGGGGGGGAGGAAAGGGAGAGAAGAGGGAGGAGCGG	hap_c14	hap_c03	GG	2	0	CC	CC	-/-
discovery	control	dog_1453	GAGAAAGAGGGAGGGAGGGAGGAGAGGGGAAAGGGGAAACGGGGAGGAACAG	AAAGGGAGGAAGGGGAGAAGGGGGCGAAGAAGGAGGGAAGAGGGAGGAGCGG	hap_c11	hap_c239	GG	2	0	CC	NA	-/-
discovery	control	dog_1455	GAGAAAGAGAGAGGGGGGAAGGGGAGGAGCAGGGGAGAAGAGGGAGGAGCAG	GAAAAAAAGGAGGGGGGGAGAGGGCGAAGAAGAAGAGAAGAGGGAGGAGCGG	hap_c140	hap_c36	GG	2	NA	CC	NA	-/-
discovery	control	dog_1458	GAAAAAGAGAGGGGAAGGAGGGAAAGGAGAAGGGGAGAAGGGGAAGGAGCAG	GAAAAAAAGGGGGGGGGGAGGGGGAGGGGAAGAAGAGAAGAAGAAGGAGCAG	hap_c02	hap_c01	GG	2	0	CC	NA	-/-
discovery	control	dog_1468	GAAAAAAAGGAGGGGGGGGGAGGGCGAAGAAGGAGGGGAGGGGGAGGAGAAG	GAAAAAAAGGGGGGGGGGAGGGGGAGGGGAAGAAGAGAAGAAGAAGGAGCAG	hap_c10	hap_c01	GG	2	NA	CC	NA	-/-
discovery	control	dog_1469	GAGAAAGAGGGAGGGGGGGAGGAGAGGGGAAAGGGGAAACGGGGAGGAACAG	GAGAAAGAGGGAGGAAGGGAGGAGAGGGGAAAGGGGAAACGGGGAGGAACAG	hap_c16	hap_c18	GG	2	NA	CC	NA	-/-
discovery	control	dog_1470	GAAAAAAAGAGGGGGGGGAGGGGGAGGGGAAGAAGAGAAGAAGAAGGAGCAG	GAAAAAAAGAGGGGGGGGAGGGGGAGGGGAAGAAGAGAAGAAGAAGGAGCAG	hap_c12	hap_c12	GG	2	NA	CC	NA	-/-
discovery	control	dog_1477	ATAAAAGAGAGGGGGAGAAAGGGGAGGAGAAGGAGGGAAGGGGAAGGAACGG	ATAAAAGAGAGGGGGAGAAAGGGGAGGAGAAGGAGGGAAGGGGAAGGAACGG	hap_c09	hap_c09	GG	2	NA	CC	NA	-/-
discovery	control	dog_1479	GAAGGGGAGAGAAGAAGGAGGGAGAGGGGAAGGGGGAAACGGGGAGGAGCAG	GAAAAAGAGAGGGGAAGGAGGGAAAGGAGAAGGGGAGAAGGGGAAGGAGCAG	hap_c153	hap_c02	GG	2	0	CC	NA	-/-
discovery	control	dog_1482	GAGAAAGAGGGAGGGGGGGAGGAGAGGGGAAAGGGGAAACGGGGAGGAACAG	GAGAAAGAGAGAGGGGGGGGAGGGCGAAGAAGGAGGGAAGAGGGAGGAGCGG	hap_c16	hap_c74	GG	2	NA	CC	NA	-/-
discovery	control	dog_1483	GAGAAAGAGAGAGGGGGGGGAGGAAGGAGAAGGGGAGAAGGGGGAGAAGCAG	GAAAAAGAGAGGGGAAGGAGGGAAAGGAGAAGGGGAGAAGGGGAAGGAGCAG	hap_c31	hap_c02	GG	2	NA	CC	NA	-/-
discovery	control	dog_1484	GAAAAAAAGGGGGGGGGGAGGGGGAGGGGAAGAAGAGAAGAAGAAGGAGCAG	GAAAAAGAGAGGGGGAGGGGAGGGAGGAGAAGAGGAGGACGGGGAGGAGCAG	hap_c01	hap_c05	GG	2	NA	CC	NA	-/-
discovery	control	dog_1486	GAAAAAAAGGGGGGGGGGAGGGGGAGGGGAAGAAGAGAAGAAGAAGGAGCAG	GAAAAAGAGAGGGGGAGGGGAGGGAGGAGAAGAGGAGGACGGGGAGGAGCAG	hap_c01	hap_c05	GG	2	NA	CC	NA	-/-
discovery	control	dog_1487	GAAAAAAAGGAGGGGGGGGGAGGGCGGGGAAGGGAAGAAGGGAGAGGAACAA	GAAAAAAAGAGGGGGGGGAGGGGGAGGGGAAGAAGAGAAGAAGAAGGAGCAG	hap_c90	hap_c12	GG	2	NA	CC	NA	-/-
discovery	control	dog_1488	GAAAAAAAGGAGGGGGGGGGAGGGCGAAGAAGGAGGGGAGGGGGAGGAGAAG	GAGAAAGAGAGGGGGGGGGGAGAGAGGAAAAGGAGGGAAGAGGGAGGAGCAG	hap_c10	hap_c04	GG	2	NA	CC	NA	-/-
discovery	control	dog_1489	GAAAAAGAGAGAGGGGGGAAAGAGAGGAGAAGGGGAGAACGGGGAGAAGCGG	GAAAAAGAGAGGGGGAGGGGAGGGAGGAGAAGAGGAGGACGGGGAGGAGCAG	hap_c17	hap_c05	GG	2	NA	CC	NA	-/-
discovery	control	dog_1490	GAAAAAAAGGGGGGGGGGAGGGGGAGGGGAAGAAGAGAACGGGGAGAAGCGG	GAAAAAAAGGGGGGGGGGAGGGGGAGGGGAAGAAGAGAAGAAGAAGGAGCAG	hap_c89	hap_c01	GG	2	NA	CC	NA	-/-
discovery	control	dog_1505	GAAGAGAGAAGGGGGGGGAGAAAAAGGGGAAGGGGGGGAGGGGGAGGAGAAG	ATAGGGGAGGGGAGAAGAAAAGGACGAAAAAGGGGAGAAGGGGGAGGCACAG	hap_c46	hap_c97	GG	2	NA	CC	NA	SINE/SINE
discovery	control	dog_1510	GAAAAAGAGAGGGGAAGGAGGGAACGAAGCAAGGAGGGGCGAGAAGGAGCGG	GAAAAAGAGAGGGGAAGGAGGGAAAGGAGAAGGGGAGAAGGGGAAGGAGCAG	hap_c191	hap_c02	GG	2	NA	CC	NA	-/-
discovery	control	dog_1512	ATGAAAGAGAGAGGGGGGGGGGGGAGGAAAGGGAGAGAAGAGGGAGGAGCGG	GAAAAAGAGAGAGGGGGGAAAGAGAGGAGAAGGGGAGAACGGGGAGAAGCGG	hap_c03	hap_c17	GG	2	NA	CC	NA	-/-
discovery	control	dog_1514	GAAGGAAAGGAGGGAAGGGGAGGGAGGGGAAGGGGAGAAGAGGGAGGAGCGG	GAAAAAGAGAGGGGAAGGAGGGAAAGGAGAAGGGGAGAAGGGGAAGGAGCAG	hap_c162	hap_c02	GG	2	NA	CC	NA	-/-
discovery	control	dog_1515	GAGAAAGAGAGAGGGGGAAAAGAGAGGAAAAGGAGAGGGCGGGGAGGAGCAG	GAAAAAAAGGAGGGGGGGGGAGGGCGAAGAAGGAGGGGAGGGGGAGAAGCGG	hap_c40	hap_c07	GG	2	NA	CC	NA	-/-
discovery	control	dog_1520	ATGAAAGAGAAAGAGAGGAGAGGGAGGGGAGGGGGAGAAGGGGGAGGAGCAG	GAGAAAGAGGGAGGGAGGGAGGAGAGGGGAAAGGGGAAACGGGGAGGAACAG	hap_c25	hap_c11	GG	2	NA	CC	NA	SINE/-
discovery	control	dog_1521	GAAAAAGAGAGGGGGAGGGGAGGGAGGAGAAGAGGAGGACGGGGAGGAGCAG	GAAAAAAAGGGGGGGGGGAGGGGGAGGGGAAGAAGAGAAGAAGAAGGAGCAG	hap_c05	hap_c01	GG	2	NA	CC	NA	-/-
discovery	control	dog_1523	GAAAAAGAGAGGGGAAGGAGGGAGCGAAGAAGGAGGGGAGGGGGAGAAGCAG	GAAAAAGAGAGGGGAAGGAGGGAAAGGAGAAGGGGAGAAGGGGAAGGAGCAG	hap_c190	hap_c02	GG	2	NA	CC	NA	-/-
discovery	control	dog_1524	GAGAAAAAGGAGGGGGGGAAGGAGAGGAGAAGGGGAGAAGGGGGAGGAGAAA	GAGAAAAAGGAGGGGGGGAAGGAGAGGAGAAGGGGAGAAGGGGGAGGAGAAA	hap_c19	hap_c19	GG	2	0	CC	NA	SINE/SINE
discovery	control	dog_1527	GAAAAAGAGAGGGGGAGGGGAGGGAGGAGAAGAGGAGGACGGGGAGGAGCAG	GAAAAAGAGAGGGGGAGGGGAGGGAGGAGAAGAGGAGGACGGGGAGGAGCAG	hap_c05	hap_c05	GG	2	NA	CC	NA	-/-
discovery	control	dog_1534	ATAGGGGAGGGGAGAAGAAAAGGACGAAAAAGGGGAGAAGAGGGAAGCGCGG	GAGAAAGAGAGGAGGGGAAAAGAGAGGGGAAGAAGAAAACGAGAAGGAGCAG	hap_c98	hap_c73	GG	2	0	CC	CC	SINE/SINE
discovery	control	dog_1536	GAGAAAGAGAGGGGGAGAGGAGGGAGGGGAAGGGGAGAAGAGGGAGGAGAAG	ATGAAAGAGAAAGAGAGGAGAGGGAGGGGAGGGGGAGAAGGGGGAGGAGCAG	hap_c08	hap_c25	GG	2	NA	CC	NA	-/-
discovery	control	dog_1537	GAGAAAGAGGGAGGGAGGGAGGAGAGGGGAAAGGGGAAACGGGGAGGAACAG	GTGAAAGAGGGGGGGAGGAGGGGGAGGAGAAGGAGAAGGGAGGGGAAAGCAA	hap_c11	hap_c39	GG	2	NA	CC	NA	-/-
discovery	control	dog_1540	GAAAAAAAGGAGGGGGGGGGAGGGCGAAGAAGGAGGGGAGGGGGAGGAGAAG	GAAAAAAAGGGGGGGGGGAGGGGGAGGGGAAGAAGAGAAGAAGAAGGAGCAG	hap_c10	hap_c01	GG	2	NA	CC	NA	-/-
discovery	control	dog_1543	GAGAAAGAGAGGGGGGGGGGAGAGAGGAAAAGGAGGGAAGAGGGAGGAGCAG	GAAAAAAAGGGGGGGGGGAGGGGGAGGGGAAGAAGAGAAGAAGAAGGAGCAG	hap_c04	hap_c01	GG	2	NA	CC	NA	-/-
discovery	control	dog_1545	GAAAAAGAGAGAGGAAGGGGAGAGAGGGGAGGGGGAGAAGAGGGAGAAGCGG	GTGAAAGAGGGGGGGAGGAGGGGGAGGAGAAGGAGAAGGGAGGGGAAAGCAA	hap_c88	hap_c39	GG	2	NA	CC	NA	-/-
discovery	control	dog_1548	GAAAAAAAGGAGGGGGGGAGAGGGCGAAGAAGAAGAGAAGAGGGAGGAAAAG	GAAAAAGAGAGGGGGAGAAGGGGGAGGGGAGGGGGAGAAGAGGGAGAAGCGG	hap_c212	hap_c187	GG	2	NA	CC	NA	-/-
discovery	control	dog_1549	ATAAAAGAGAGGGGGAGAAAGGGGAGGAGAAGGAGGGAAGGGGAAGGAACGG	GAGAAAGAGAGGGGGGGGGGAGAGAGGAAAAGAAGGGAAGAGGGAGGAGCAG	hap_c09	hap_c30	GG	2	NA	CC	NA	SINE/-
discovery	control	dog_1554	AAAGGGAGGAAGGGGAGAAGGGGGCAAGAAAGGGGAGAAGAGAGAGGAAAAG	GAGAAAGAGAGGGGGGGGGGAGAGAGGAAAAGGAGGGAAGAGGGAGGAGCAG	hap_c29	hap_c04	GG	2	NA	CC	NA	-/-
discovery	control	dog_1558	GAAAAAGAGAGGGGGAGGGGAGGGAGGAGAAGAGGAGGACGGGGAGGAGCAG	GAAAAAAAGGGGGGGGGGAGGGGGAGGGGAAGAAGAGAAGAAGAAGGAGCAG	hap_c05	hap_c01	GG	2	NA	CC	NA	-/-
discovery	control	dog_1559	ATGAAAGAGAGAGGGGGGGGGGGGAGGAAAGGGAGAGAAGAGGGAGGAGCGG	ATGAAAGAGAGAGGGGGGGGGGGGAGGAAAGGGAGAGAAGAGGGAGGAGCGG	hap_c03	hap_c03	GG	2	NA	CC	NA	-/-
discovery	control	dog_1560	ATGAAAGAGAGAGGGGGGGGGGGGAGGAAAGGGAGAGAAGAGGGAGGAGCGG	GAAAAAAAGGGGGGGGGGAGGGGGAGGGGAAGAAGAGAAGAAGAAGGAGCAG	hap_c03	hap_c01	GG	2	NA	CC	NA	-/-
discovery	control	dog_1562	GAAAAAGAGAGGGGGAGGGGAGGGAGGAGAAGAGGAGGACGGGGAGGAGCAG	GAAAAAAAGGAGGGGGGGAGAGGGCGAAGAAGAAGAGAAGAGGGAGGAGCGG	hap_c05	hap_c36	GG	2	NA	CC	NA	SINE/SINE
discovery	control	dog_1563	GAGAAAGAGAGGGGGGGGGGAGAGAGGAAAAGGAGGGAAGAGGGAGGAGCAG	GAGAAAGAGAGGGGGGGGGGAGAGAGGAAAAGGAGGGAAGAGGGAGGAGCAG	hap_c04	hap_c04	GG	2	NA	CC	NA	-/-
discovery	control	dog_1572	GAAAAAAAGGGGGGGGGGAGGGGGAGGGGAAGAAGAGAAGAAGAAGGAGCAG	GAGAAAGAGAGAGGGGGGGGAGAGCGAAAAAGGGAAGAAGGGAGAGGAACAA	hap_c01	hap_c14	GG	2	NA	CC	NA	-/-
discovery	control	dog_1573	GAGAAAGAGAGGGGGGGGGGAGAGAGGAAAAGGAGGGAAGAGGGAGGAGCAG	GAGAAAGAGAGAGGGGGAAAAGAGAGGAAAAGGAGAGGGCGGGGAGGAGCAG	hap_c04	hap_c40	GG	2	NA	CC	NA	-/-
discovery	control	dog_1579	GTAAAAAAGGAAGGGAGGAAAGGGAGGAAAAGAAGGGAAGGGGGAAGAGCGA	GAAAAAAAGGGGGGGGGGAGGGGGAGGGGAAGAAGAGAAGAAGAAGGAGCAG	hap_c66	hap_c01	GG	2	NA	CC	NA	-/-
discovery	control	dog_1582	ATGAAAGAGAAAGAGAGGAGAGGGAGGAAAAGGGGAGAAGAGGGAGGAACAG	GAAAAAAAGGGGGGGGGGAGGGGGAGGGGAAGAAGAGAAGAAGAAGGAGCAG	hap_c52	hap_c01	GG	2	NA	CC	NA	-/-
discovery	control	dog_1583	GAAAAAAAGGGGGGGGGGAGGGGGAGGGGAAGAAGAGAAGAAGAAGGAGCAG	GAAGAGAGGAGGAGAAGGGGGGGGAGGAAAGGGAGAGAAGAGGGAGGAGCGG	hap_c01	hap_c44	GG	2	NA	CC	NA	-/-
discovery	control	dog_1584	GAAAAAAAGGAGGGGGGGAGAGGGCGAAGAAGAAGAGAAGAGGGAGGAGCGG	GAGAAAGAGGGAGGGGGGGAGGAGAGGGGAAAGGGGAAACGGGGAGGAACAG	hap_c36	hap_c16	GG	2	NA	CC	NA	-/-
discovery	control	dog_1586	GAAAAAAAGGGGGGGGGGAGGGGGAGGGGAAGAAGAGAAGAAGAAGGAGCAG	GAAGAGAGGAGGAGAAGGAGAGGGAGGAGCAGGAGAGAAGAAGAGAAAACAA	hap_c01	hap_c06	GG	2	NA	CC	NA	-/-
discovery	control	dog_1587	GAGAAAGAGAGAGGGGGGGGAAGGAGGGGAAAGGAAGAAGAGGGAGGAGAAG	ATGAAAGAGGGGGGGAGGAGAGGGAGGAAAAGAAGAGAACGGGGAGGAGCGG	hap_c33	hap_c28	GG	2	NA	CC	NA	SINE/SINE
discovery	control	dog_1588	GAGAAAGAGAGGGGGGGGGGAGAGAGGAAAAGAAGGGAAGAGGGAGGAGCAG	GTGAAAGAGAGAGGGAGAAGAGAGCGGAAAAGAAGGGGAGGGGAAGGAAAAG	hap_c30	hap_c13	GG	2	NA	CC	NA	-/-
discovery	control	dog_1589	ATAAAAGAGAGGGGGAGAAAGGGGAGGAGAAGGAGGGAAGGGGAAGGAACGG	GAGAAGAGAAGGGAGAGGGAAGGGAGGGGCAGGGAAGAAGGAGAAGGAGAAG	hap_c09	hap_c112	GG	2	NA	CC	NA	-/-
discovery	control	dog_1591	ATGAAAGAGAAGGGGGGGGGAGAGAGGAAAAGGAGGGAAGAGGGAGGAGCAG	ATGAAAGAGAAGGGGGGGGGAGAGAGGAAAAGGAGGGAAGAGGGAGGAGCAG	hap_c95	hap_c95	GG	2	NA	CC	NA	-/-
discovery	control	dog_1593	GAAAAAAAGGAGGGGGGGAAGGAGCGAGGAAGGGGAGAAGAAGGAGGAGCAG	ATGAAAGAGGGGGGGAGGAGAGGGAGGAAAAGAAGAGAACGGGGAGGAGCGG	hap_c214	hap_c28	GG	2	NA	CC	NA	SINE/-
discovery	control	dog_1594	GAAAAAAAGGGGGGGGGGAGGGGGAGGGGAAGAAGAGAAGAAGAAGGAGCAG	GAAGAGAGAAGGGAGAGGGAAGGGAGGGGCAGGGAAGAAGGAGAAGGAGAAG	hap_c01	hap_c83	GG	2	NA	CC	NA	SINE/-
discovery	control	dog_1595	GAAAAGAGGGGGGAGAGGAGGGAGAGGGGAAGAAGGGGAGGGGGAGGAACAG	GAGAAAGAGAGAGGGGGAAGGGAGCGAAAAAGGGGAGAAGAGGGAGGAACAG	hap_c175	hap_c142	GG	2	NA	CC	NA	SINE/SINE
discovery	control	dog_1597	GAGGAGAAGAGAGGGGGGGGAGAGCGGAGAAGGGGAGAAGAGGGAGGAGCGG	GAGAAAGAGAGAGGGGGGGGAGAGAGGGGAAGGAGAGGGGGAGAAGGAGCAG	hap_c107	hap_c135	GG	2	NA	CC	NA	SINE/SINE
discovery	control	dog_1599	GAAAAAGAGAGGGGAAGGAGGGAAAGGAGAAGGGGAGAAGGGGAAGGAGCAG	GAAAAAAAGGGGGGGGGGAGGGGGAGGGGAAGAAGAGAAGAAGAAGGAGCAG	hap_c02	hap_c01	GG	2	NA	CC	NA	-/-
discovery	control	dog_1600	GAGAAAGAGGGAGGGGGGGAGGAGAGGGGAAAGGGGAAACGGGGAGGAACAG	GAAAAAAAGAGGGGGGGGGGAGAGAGGAAAGGAAGAGAAGGGGGAGAAGCAG	hap_c16	hap_c216	GG	2	NA	CC	NA	-/-
discovery	control	dog_1602	GAAAAAAAGAGGGGGGGGAGGGGGAGGGGAAGAAGAGAAGAAGAAGGAGCAG	GAAGGGGAGGGGAGAAGGGGAGAGAGGGGAGGGGGAGAAGGGGGAGGAGCAG	hap_c12	hap_c26	GG	2	NA	CC	NA	-/-
discovery	control	dog_1603	ATGAAAGAGAGAGGGGGGGGGGGGAGGAAAGGGAGAGAAGAGGGAGGAGCGG	GAAAAAGAGAGGGGAAGGAGGGAAAGGAGAAGGGGAGAAGGGGAAGGAGCAG	hap_c03	hap_c02	GG	2	NA	CC	NA	SINE/-
discovery	control	dog_1606	GAAAAAAAGGAGGGGGGGGGAGGGCGAAGAAGGAGGGGAGGGGGAGAAGCGG	GAAAAAAAGGAGGGGGGGGGAGGGCGAAGAAGGAGGGGAGGGGGAGAAGCGG	hap_c07	hap_c07	GG	2	NA	CC	NA	-/-
discovery	control	dog_1608	GAAAAAGAGAGGGGAAGGAGGGAAAGGAGAAGGGGAGAAGGGGAAGGAGCAG	GAGAAAGAGAGGGGGGGGGGAGAGAGGAAAAGGAGGGAAGAGGGAGGAGCAG	hap_c02	hap_c04	GG	2	NA	CC	NA	-/-
discovery	control	dog_1609	GAAAAAAAGGGGGGGGGGAGGGGGAGGGGAAGAAGAGAAGAAGAAGGAGCAG	GAAAAAAAGGAGGGGGGGGGAGGGCGAAGAAGGAGGGGAGGGGGAGAAGCGG	hap_c01	hap_c07	GG	2	NA	CC	NA	-/-
discovery	control	dog_1610	GAAGAGAGGAGGAGAAGGAGAGGGAGGAGCAGGAGAGAAGAAGAGAAAACAA	GAAAAAGAGAGGGGGAGGGGAGGGAGGAGAAGAGGAGGACGGGGAGGAGCAG	hap_c06	hap_c05	GG	2	NA	CC	NA	-/-
discovery	control	dog_1611	ATAGGGGAGGGGAGAAGAAAGGAAAGGAGAAGGAGAAAACGGGGAGGAAAAG	GAAGAGAAGAGAGGGGGAAGAGAGAGGGGAAGGGGGGGAGGGGGAGGAGAAG	hap_c62	hap_c172	GG	2	NA	CC	NA	-/-
discovery	control	dog_1612	GAAGAGAGGAGGAGAAGGAGAGGGAGGAGCAGGAGAGAAGAAGAGAAAACAA	GAAAAAAAGGAGGGGGGGGGAGGGCGAAGAAGGAGGGGAGGGGGAGAAGCGG	hap_c06	hap_c07	GG	2	NA	CC	NA	-/-
discovery	control	dog_1614	GAAAAAGAGAGAGGGGGGAAAGAGAGGAGAAGGGGAGAACGGGGAGAAGCGG	GAGAAAGAGAGAGAGAGGAGAGGGCGAAGAAGGGGAGGACGGGGAGGAGAAG	hap_c17	hap_c145	GG	2	NA	CC	NA	SINE/-
discovery	control	dog_1615	GAGAAGGAGAGAAGAAGGAGGGAGAGGGAAAGGGGAGAAGGGGGAGAAGCGG	ATGAAAGAGGGGGGGAGGAGAGGGAGGAAAAGAAGAGAACGGGGAGGAGCAG	hap_c68	hap_c218	GG	2	NA	CC	NA	SINE/SINE
discovery	control	dog_1616	GAAGGGGAGAGAAGAAGGAGGGAGAGGGGAAGGGAGGGACGGGGAGGAACAA	ATAAAAGAGAGGGGGAGAAAGGGGAGGAGAAGGAGGGAAGGGGAAGGAACGG	hap_c23	hap_c09	GG	2	NA	CC	NA	-/-
discovery	control	dog_1618	ATAAAAGAGAGGGGGAGGAGGGAGAGGGGAAGGGGAGAAGGGGGAGGAGAAG	GAAGAGAGGAGGAGAAGGAGAGGGAGGAGAAGGAGAAGGGAGGGGAAAGCAA	hap_c63	hap_c45	GG	2	NA	CC	NA	SINE/-
discovery	control	dog_1619	GAGAAAGAGGGAGGGAGGAAAGGACGAAAAAGGGGAGAAGGAGGAGGAGCAG	GTGAAAGAGAGAGGGAGAAGAGAGCGGAAAAGAAGGGGAGGGGAAGGAAAAG	hap_c118	hap_c13	GG	2	NA	CC	NA	-/-
discovery	control	dog_1620	GAGAAAGAGAGAGGGGGGGGAGGAAGGAGAAGGGGAGAAGGGGGAGAAGCAG	GAAGGGGAGAGAAGAAGGAGGGAGAGGGGCAGGAGGGAAGAGGGAGGAGCAG	hap_c31	hap_c15	GG	2	NA	CC	NA	SINE/-
discovery	control	dog_1621	GAAAAAGAGAGGGGAAGGAGGGAAAGGAGAAGGGGAGAAGGGGAAGGAGCAG	GAAAAAGAGAGGGGGAGGGGAGGGAGGAGAAGAGGAGGACGGGGAGGAGCAG	hap_c02	hap_c05	GG	2	NA	CC	NA	-/-
discovery	control	dog_1622	GAGAAAGAGAGGGGGGGGGGAGAGAGGAAAAGGAGGGAAGAGGGAGGAGCAG	GAAAAAGAGAGGGGGAGGGGAGGGAGGAGAAGAGGAGGACGGGGAGGAGCAG	hap_c04	hap_c05	GG	2	NA	CC	NA	-/-
discovery	control	dog_1627	GAAAAAGAGAGGGGGAGGGGAGGGAGGAGAAGAGGAGGACGGGGAGGAGCAG	ATGAAAGAGAAAGAGAGGAGAGGGAGGAGAAGAGGAGGACGGGGAGGAGCAG	hap_c05	hap_c51	GG	2	NA	CC	NA	-/-
discovery	control	dog_1628	ATAAAAGAGAGGGGGAGAAAGGGGAGGAGAAGGAGGGAAGGGGAAGGAACGG	ATAAAAGAGAGGGGGAGAAAGGGGAGGAGAAGGAGGGAAGGGGAAGGAACGG	hap_c09	hap_c09	GG	2	NA	CC	NA	SINE/SINE
discovery	control	dog_1629	GAGAAAGAGAGAGGGGGGGGAGAGAGGGGAAGGAGAAGAGAGGGGAAAGCGG	GAAAAAAAGGAGGGAAGGAGGGGGAGGAGAAGGAGAGGGGGAGAAGGAGCAG	hap_c55	hap_c92	GG	2	NA	CC	NA	SINE/SINE
discovery	control	dog_1631	ATGAAAGAGAGAGGGGGGGGGGGGAGGAAAGGGAGAGAAGAGGGAGGAGCAG	GAGAAAGAGAGGGGGGGGGGAGAGAGGAAAAGGAGGGAAGAGGGAGGAGCAG	hap_c221	hap_c04	GG	2	NA	CC	NA	-/-
discovery	control	dog_1634	GAAAAAGAGAGAGGGGGAAAAAGGAGGGGAAAGGAAGAAGAGGGAGGAGCGG	GAAAAAGAGAGAGGGGGAAAAAGGAGGGGAAAGGAAGAAGAGGGAGGAGCGG	hap_c21	hap_c21	GG	2	NA	CC	NA	SINE/SINE
discovery	control	dog_1635	GAGAAAAAGGAGGGGGGGGGAGAGAGGAGCAGGGGAGAAGAGGGAGGAACAG	GAAAAAGAGAGGGGGAGGAGGGGGAGGAAAAGGAGGGAAGGGGGAGGAGAAG	hap_c147	hap_c185	GG	2	NA	CC	NA	SINE/SINE
discovery	control	dog_1636	GAAAAAAAGGAGGGGGGGGGAGGGCGAAGAAGGAGGGGAGGGGGAGGAGAAG	GAAAAAAAGGGGGGGGGGAGGGGGAGGGGAAGAAGAGAAGAAGAAGGAGCAG	hap_c10	hap_c01	GG	2	NA	CC	NA	-/-
discovery	control	dog_1638	GAAGGGGAGAGAAGAAGGAGGGAGAGGGGAAGAGGGGAACGGGAAGAAACAA	GAAGAGAAGAGAGGAAGGGGAGAGAGGGGAGGGGGAGAACGGGGAGAAGCAG	hap_c156	hap_c48	GG	2	NA	CC	NA	SINE/SINE
discovery	control	dog_1640	ATGAAAGAGGGGGGGAGGAGAGGGAGGAAAAGAAGAGAACGGGGAGGAGCGG	GAAGAGAGAAGGGAGAGGAGAGGGCGAAGCAGAAGAAAAGGGGGAGGAGCGG	hap_c28	hap_c47	GG	2	NA	CC	NA	SINE/SINE
discovery	control	dog_1641	GTGAAGAAGGGGGGAAGGAGAAGGAGGGGAAGGGGAGAAGAGGAAGGAAAAG	GAAAAAGAGAGGGGGAGAAGGGGGAGGGGAGGGGGGGGAGAGGGAGGAACAG	hap_c32	hap_c49	GG	2	NA	CC	NA	-/-
discovery	control	dog_1642	GAAGAGAAGAGAGGAAGGGGAGAGAGGGGAGGGGGAGAAGAGAGAGGAAAAG	GAGAAAAAGGAGGGGGGGAAGGAGAGGAGAAGGGGAGAAGGGGGAGGAGAAA	hap_c24	hap_c19	GG	2	NA	CC	NA	SINE/SINE
discovery	control	dog_1644	GAAGAGAAGAGAGGGGGAAGAGAGAGGGGAAGGGGAGAAGAGGGAGGAGCGG	AAAGGGGAGAGAAGAAGGAGGGAGAGGGGAAGAAGAGAAGGAGGAGGAGCGG	hap_c174	hap_c101	GG	2	NA	CC	NA	SINE/SINE
discovery	control	dog_1645	GAGAAAAAGGAGGGGGGGAAGGAGAGGAGAAGGGGAGAAGGGGGAGGAGAAA	GAGAAAAAGGAGGGGGGGAAGGAGAGGAGAAGGGGAGAAGGGGGAGGAGAAA	hap_c19	hap_c19	GG	2	NA	CC	NA	SINE/SINE
discovery	control	dog_1647	ATGAAAGAGAAAGAGAGGAGAGGGAGGAAAAGGGGAGAAGAGGGAGGAACAG	GAAAAAGAGAGAGGGGGGGGAGAGAGGGGAGGGGGGGGAGAGGGAGGAACAG	hap_c52	hap_c34	GG	2	NA	CC	NA	SINE/SINE
discovery	control	dog_1650	GTGAAAGAGAGAGGGAGAAGAGAGCGGAAAAGAAGGGGAGGGGAAGGAAAAG	GAAGGGGAGGGGAGAAGGGGAGAGCAAGAAAGGGAAGAACGGGGAGGCGCGG	hap_c13	hap_c78	GG	2	NA	CC	NA	-/-
discovery	control	dog_1651	ATAGGGGAGGGGAGAAGGGGAGAGAGGGGAGGGGGAGAAGGAGAAGGAGCAG	GAGAAGGAGAGAAGAAGGAGGGAGAGGGGAAGGGAGGGGCGAGAAGGAGCGG	hap_c61	hap_c67	GG	2	NA	CC	NA	SINE/SINE
discovery	control	dog_1653	GAGAAAGAGAGGGGGGGGGGAGAGAGGAAAAGGAGGGAAGAGGGAGGAGCAG	GAAAAAGAGAGGGGAAGGAGGGAAAGGAGAAGGGGAGAAGGGGAAGGAGCAG	hap_c04	hap_c02	GG	2	NA	CC	NA	-/-
discovery	control	dog_1654	GAGAAAGAGGGAGGAAGGGAGGAGAGGGGAAAGGGGAAACGGGGAGGAACAG	GAGAAAGAGGGAGGGAGGGAGGAGAGGGGAAAGGGGAAACGGGGAGGAACAG	hap_c18	hap_c11	GG	2	NA	CC	NA	SINE/-
discovery	control	dog_1656	GAAGGGGAGAGAAGAAGGAGGGAGAGGGGAAGAAGAGAAGGGGGAGGAGCAA	GAAGAGAAGAGAGGAAGGGGAGAGAGGGGAGGGGGAGAACGGGGAGAAGCAG	hap_c80	hap_c48	GG	2	0	CC	CC	SINE/SINE
discovery	control	dog_1658	ATAAAAGAGAGGGGGAGAAAGGGGAGGAGAAGGAGGGAAGGGGAAGGAACGG	GTAGGGAAGGGGAGAAGGAGGGGGAGGGGAAAGAGAGAAGAGGGGAAAGCAG	hap_c09	hap_c65	GG	2	NA	CC	NA	-/-
discovery	control	dog_1660	ATGAAAGAGAGAGGGGGGGGGGGGAGGAAAGGGGAAGAAGGAGAAGGAGAAG	GAGAAAGAGGGAGGGGGGGAGGAGAGGGGAAAGGGGAAACGGGGAGGAACAG	hap_c37	hap_c16	GG	2	NA	CC	NA	-/-
discovery	control	dog_1661	GAAAAAGAGAGGGGAAGGAGGGAAAGGAGAAGGGGAGAAGGGGAAGGAGCAG	GAAAAAAAGGAGGGGGGGGGAGGGCGAAGAAGGAGGGGAGGGGGAGGAGAAG	hap_c02	hap_c10	GG	2	NA	CC	NA	-/-
discovery	control	dog_1662	ATAGGGGAGGGGAGAAGAAAAGGGAGGAAAAGGGGAGAAGGGGGAGAAGCAG	ATAAAAGAGAGGGGGAGGAGGGAGAGGGGAAGGGGAGAAGGGGGAGGAGAAG	hap_c96	hap_c63	GG	2	NA	CC	NA	SINE/SINE
discovery	control	dog_1664	GAAAAAGAGAGGGGGAGGGGAGGGAGGAGAAGAGGAGGACGGGGAGGAGCAG	GAGAAAGAGAGGGGGGGGGGAGAGAGGGGAAGAAGAGAAGAAGAAGGAGCAG	hap_c05	hap_c120	GG	2	NA	CC	NA	-/-
discovery	control	dog_1667	ATAAAAGAGAGGGGGAGAAAGGGGAGGAGAAGGAGGGAAGGGGAAGGAACGG	GAAAAAAAGAGGGGGGGGAGGGGGAGGGGAAGAAGAGAAGAAGAAGGAGCAG	hap_c09	hap_c12	GG	2	NA	CC	NA	SINE/-
discovery	control	dog_1668	GAAGAGAGGAGGAGAAGGAGAGGGAGGAGCAGGAGAGAAGAAGAGAAAACAA	ATGAAAGAGAGAGGGGGGGGGGGGAGGAAAGGGAGAGAAGAGGGAGGAGCGG	hap_c06	hap_c03	GG	2	NA	CC	NA	-/-
discovery	control	dog_1670	GAGAAAGAGAGGGGGAGAGGAGGGAGGGGAAGGGGAGAAGAGGGAGGAGAAG	GAGAAAGAGAGGGGGAGAGGAGGGAGGGGAAGGGGAGAAGAGGGAGGAGAAG	hap_c08	hap_c08	GG	2	NA	CC	NA	-/-
discovery	control	dog_1671	GAGAAAGAGAGAGGGGGGGGAGGGCGAGGAAGGAGAGAAGAGGGAGGAACAG	GAAGAGAAGAGAGGAAGGGGAGAGAGGGGAGGGGGAGAACGGGGAGAAGCAG	hap_c129	hap_c48	GG	2	NA	CC	NA	SINE/SINE
discovery	control	dog_1677	GTGAAAGAGAGAGGGAGAAGAGAGCGGAAAAGAAGGGGAGGGGAAGGAAAAG	GTGAAAGAGAGAGGGAGAAGAGAGCGGAAAAGAAGGGGAGGGGAAGGAAAAG	hap_c13	hap_c13	GG	2	NA	CC	NA	SINE/-
discovery	control	dog_1678	GAAAAAAAGGAGGGGGGGGGAGGGCGAAGAAGGAGGGGAGGGGGAGAAGCGG	GAAAAAGAGAGGGGAAGGAGGGAAAGGAGAAGGGGAGAAGGGGAAGGAGCAG	hap_c07	hap_c02	GG	2	NA	CC	NA	SINE/-
discovery	control	dog_1679	GAAAAAGAGAGGGGAAGGAGGGAAAGGAGAAGGGGAGAAGGGGAAGGAGCAG	GAAGGGGAGAGAAGAAGGAGGGAGAGGGGCAGGAGGGAAGAGGGAGGAGCAG	hap_c02	hap_c15	GG	2	NA	CC	NA	SINE/-
discovery	control	dog_1682	GAGAAAGAGAGAGGGGGGGGAGAGAGGGGCAGGAGGGAAGGGGGAGGAACAG	AAAGGGAGGAAGGGGAGAAGGGGGCGAAGAAGAAGAGAAGAGGGAGGAGCGG	hap_c134	hap_c240	GG	2	NA	CC	NA	-/-
discovery	control	dog_1686	GAAGGGGAGAGAAGAAGGAGGGAGAGGGGAAGAAGAGAAGGAGGAGGAGCGG	GAAAAAAAGGAGGGGGGGAGAGGGAGGAGAAGGGGAGAACAGGGGAAAGCAA	hap_c157	hap_c91	GG	2	NA	CC	NA	SINE/SINE
discovery	control	dog_1687	GAGAAAGAGGGAGGGGGGGAGGAGAGGGGAAAGGGGAAACGGGGAGGAACAG	GAAAAAAAGGAGGGGGGGGGAGAGCAAGGCAGAAGAGGGCGAGGAGGAACAA	hap_c16	hap_c35	GG	2	NA	CC	NA	-/-
discovery	control	dog_1692	AAAGGGAGGAAGGGGAGAAGGGGGCAAGAAAGGGGAGAAGAGAGAGGAAAAG	GAGAAAGAGGGAGGGAGGGAGGAGAGGGGAAAGGGGAAACGGGGAGGAACAG	hap_c29	hap_c11	GG	2	0	CC	CC	SINE/SINE
discovery	control	dog_1696	GAGAAAGAGAGGGGGGGGGGAGAGAGGAAAAGGAGGGAAGAGGGAGGAGCAG	GAAAAAAAGGAGGGGGGGGGAGGGCGAAGAAGGAGGGGAGGGGGAGGAGAAG	hap_c04	hap_c10	GG	2	NA	CC	NA	-/-
discovery	control	dog_1697	GAAAAAGAGAGGGGAAGGAGGGAAAGGAGAAGGGGAGAAGGGGAAGGAGCAG	GAGAAAGAGAGGGGGGGGGGAGAGAGGAAAAGGAGGGAAGAGGGAGGAGCAG	hap_c02	hap_c04	GG	2	NA	CC	NA	-/-
discovery	control	dog_1700	GAAAAAGAGAGAGGGGGAAAAAGGAGGGGAAAGGAAGAAGAGGGAGGAGCGG	GAAAAAGAGAGAGGGGGAAAAAGGAGGGGAAAGGAAGAAGAGGGAGGAGCGG	hap_c21	hap_c21	GG	2	NA	CC	NA	SINE/SINE
discovery	control	dog_1701	GAAAAAAAGGGGGGGGGGAGGGGGAGGGGAAGAAGAGAAGAAGAAGGAGCAG	GAAGGGGAGAGAAGAAGGAGGGAGAGGGGCAGGAGGGAAGAGGGAGGAGCAG	hap_c01	hap_c15	GG	2	NA	CC	NA	SINE/-
discovery	control	dog_1702	GAAAAAGAGAGGGGAAGGAGGGAAAGGAGAAGGGGAGAAGGGGAAGGAGCAG	GAAAAAGAGAGGGGAAGGAGGGAAAGGAGAAGGGGAGAAGGGGAAGGAGCAG	hap_c02	hap_c02	GG	2	NA	CC	NA	SINE/-
discovery	control	dog_1703	GAAAAAGAGAGGGGGAGGGGAGGGAGGAGAAGAGGAGGACGGGGAGGAGCAG	GAAAAAGAGAGGGGGAGGGGAGGGAGGAGAAGAGGAGGACGGGGAGGAGCAG	hap_c05	hap_c05	GG	2	0	CC	CC	-/-
discovery	control	dog_1706	ATGAAAGAGAGAGGGGGGGGGGAGAGGAAAAGGAGGGAAGAGGGAGGAGCAG	GAAAAAAAGGGGGGGGGGAGGGGGAGGGGAAGAAGAGAAGAAGAAGGAGCAG	hap_c50	hap_c01	GG	2	NA	CC	NA	-/-
discovery	control	dog_1710	ATGAAAGAGAGAGGGGGGGGGGGGAGGAAAGGGAGAGAAGAGGGAGGAGCGG	GAAGGGGAGAGAAGAAGGAGGGAGAGGGGCAGGAGGGAAGAGGGAGGAGCAG	hap_c03	hap_c15	GG	2	NA	CC	NA	-/-
discovery	control	dog_1718	GAAAAAGAGAGAGGGGGGAAAGAGAGGAGAAGGGGAGAACGGGGAGAAGCGG	ATGAAAGAGAGAGGGGGGGGGGGGAGGAAAGGGAGAGAAGAGGGAGGAGCGG	hap_c17	hap_c03	GG	2	NA	CC	NA	-/-
discovery	control	dog_1719	GAGAAAGAGAGGGGGAGAGGAGGGAGGGGAAGGGGAGAAGAGGGAGGAGAAG	ATAAAAGAGAGGGGGAGAAAGGGGAGGAGAAGGAGGGAAGGGGAAGGAACGG	hap_c08	hap_c09	GG	2	NA	CC	NA	-/-
discovery	control	dog_1720	ATGAAGAAGGGGAGAAGGAAAAAACAAGAAAGGGGAGGGCGGGGAGGAGCAG	GAAAAAAAGGGGGGGGGGAGGGGGAGGGGAAGAAGAGAAGAAGAAGGAGCAG	hap_c94	hap_c01	GG	2	NA	CC	NA	-/-
discovery	control	dog_1721	GAGAAAGAGAGGGGGAGAGGAGGGAGGGGAAGGGGAGAAGAGGGAGGAGAAG	GAAGGGGAGAGAAGAAGGAGGGAGAGGGGAAGGGAGGGACGGGGAGGAACAA	hap_c08	hap_c23	GG	2	NA	CC	NA	-/-
discovery	control	dog_1723	GAAGAGAAGAGAGGAAGGGGAGAGAGGGGAGGGGGAGAACGGGGAGGAGCAG	ATGAAAGAGAAAGAGAGGAGAGGGAGGGGAGGGGGAGAAGGGGGAGGAGCAG	hap_c85	hap_c25	GG	2	NA	CC	NA	-/-
discovery	control	dog_1728	GAGAAAGAGAGGGGGGGGGGAGAGAGGAAAAGGAGGGAAGAGGGAGGAGCAG	GAAAAAGAGAGGGGAAGGAGGGAAAGGAGAAGGGGAGAAGGGGAAGGAGCAG	hap_c04	hap_c02	GG	2	NA	CC	NA	-/-
discovery	control	dog_1738	GAGAAAAAGGAGGGGGGGAAGGAGAGGAGAAGGGGAGAAGGGGGAGGAGAAA	GAAAAAGAGAGAGGGGGAAAAAGGAGGGGAAAGGAAGAAGAGGGAGGAGCGG	hap_c19	hap_c21	GG	2	NA	CC	NA	SINE/SINE
discovery	control	dog_1740	GAAAAAGAGAGAGGGGGGAAAGAGAGGAGAAGGGGAGAACGGGGAGAAGCGG	GAAAAAAAGGGGGGGGGGAGGGGGAGGGGAAGAAGAGAAGAAGAAGGAGCAG	hap_c17	hap_c01	GG	2	NA	CC	NA	SINE/-
discovery	control	dog_1742	GAGAAAAAGGAGGGGGGGAAGGAGAGGAGAAGGGGAGAAGGGGGAGGAGAAA	GAGAAAGAGAGAGGGGGGGGAGAGAGGGGCAGGAGAGAAGGGGGAGGCGAAA	hap_c19	hap_c54	GG	2	NA	CC	NA	SINE/SINE
discovery	control	dog_1743	GAAGGGGAGAGAAGAAGGAGGGAGAGGGGAAGGGGGAAACGGGGAGGAACAG	GAAAAAGAGAGGGGAAGGAGGGAAAGGAGAAGGGGAGAAGGGGAAGGAGCAG	hap_c42	hap_c02	GG	2	NA	CC	NA	-/-
discovery	control	dog_1744	GAAAAAAAGGGGGGGGGGAGGGGGAGGGGAAGAAGAGAAGAAGAAGGAGCAG	GAGAAAGAGAGGGGGGGGGGAGAGAGGAAAAGGAGGGAAGAGGGAGGAGCAG	hap_c01	hap_c04	GG	2	NA	CC	NA	-/-
discovery	control	dog_1745	ATAAAAGAGAGGGGGAGAAAGGGGAGGAGAAGGAGGGAAGGGGAAGGAACGG	ATGAAAGAGAAAGAGAGGAGAGGGAGGGGAAGAGGAGAAGAGGGAGGAGCAG	hap_c09	hap_c226	GG	2	NA	CC	NA	-/-
discovery	control	dog_1746	ATAGGGGAGGGGAGAAGGGGAGAGAGGGGAGGGGGAGAAGGAGAAGGAGCAG	ATAGGGGAGGGGAGAAGGGGAGAGAGGGGAGGGGGAGAAGGAGAAGGAGCAG	hap_c61	hap_c61	GG	2	0	CC	NA	SINE/SINE
discovery	control	dog_1747	GTGAAAGAGAGAGGGAGAAGAGAGCGGAAAAGAAGGGGAGGGGAAGGAAAAG	GAGAAAGAGAGGGGGAGAGGAGGGAGGGGAAGGGGAGAAGAGGGAGGAGAAG	hap_c13	hap_c08	GG	2	NA	CC	NA	-/-
discovery	control	dog_1748	GAGAAAGAGAGGGGGGGGGGAGAGAGGAAAAGGAGGGAAGAGGGAGGAGCAG	GAGAAAGAGAGGGGGGGGGGAGAGAGGAAAAGGAGGGAAGAGGGAGGAGCAG	hap_c04	hap_c04	GG	2	NA	CC	NA	SINE/-
discovery	control	dog_1751	GAGAAAGAGAGAGGGGGGGGAAGGAGGGGAAAGGAAGAAGAGGGAGGAGAAG	ATAGGGGAGGGGAGAAGAAAAGGACGAAAAAGGGGAGAAGGGGGAGGCACAG	hap_c33	hap_c97	GG	2	NA	CC	NA	SINE/-
discovery	control	dog_1752	GAAGAGAGGAGAGGGGGGGGAGAGAGGGGAGGGGGGGGAGAGGGAGGAACAG	GAGAAAGAGAGAGAGAGGAGAGGGCAAGAAAGGGGAGAAGAGAGAGGAAAAG	hap_c166	hap_c22	GG	2	NA	CC	NA	-/-
discovery	control	dog_1753	GAAAAAGAGAGGGGGAGGAGGGAGAGGGGAAGAGGAGAAGAGGAAGGAGAAA	GAAAAAAAGAGGGGGGGGAGGGGGAGGGGAAGAAGAGAAGAAGAAGGAGCAG	hap_c186	hap_c12	GG	2	NA	CC	NA	-/-
discovery	control	dog_1754	GTGAAAGAGAGAGGGAGAAGAGAGCGGAAAAGAAGGGGAGGGGAAGGAAAAG	GAAAAAGAGAGGGGGAGAAGGGGGAGGGGAGGGGGGGGAGAGGGAGGAACAG	hap_c13	hap_c49	GG	2	NA	CC	NA	-/-
discovery	control	dog_1756	ATAAAAGAGAGGGGGAGAAAGGGGAGGAGAAGGAGGGAAGGGGAAGGAACGG	GTGAAAGAGAGAGGGAGAAGAGAGCGGAAAAGAAGGGGAGGGGAAGGAAAAG	hap_c09	hap_c13	GG	2	NA	CC	NA	-/-
discovery	control	dog_1757	GAGAAAGAGAGAGGGGGGGGAGAGCGAAAAAGGGAAGAAGGGAGAGGAACAA	GAAAAAAAGGAGGGGGGGGGAGGGCGAAGAAGGAGGGGAGGGGGAGAAGCGG	hap_c14	hap_c07	GG	2	NA	CC	NA	-/-
discovery	control	dog_1758	GAAGGGGAGGGGAGAAGGGGAGGGAGGAGCAGGGGAGAAGAGGGAGGAACAG	GAAGGGGAGGGGAGAAGGGGAGGGAGGAGCAGGGGAGAAGAGGGAGGAACAG	hap_c77	hap_c77	GG	2	0	CC	NA	SINE/SINE
discovery	control	dog_1759	GAAAAAGAGAGAGGGGGGGGAGAGAGGGGAGGGGGGGGAGAGGGAGGAACAG	GAAGAGAGGAGGAGAAGGAGAGGGAGGAGAAGGAGAAGGGAGGGGAAAGCAA	hap_c34	hap_c45	GG	2	NA	CC	NA	SINE/SINE
discovery	control	dog_1764	GAAAAAAAGGGGGGGGGGAGGGGGAGGGGAAGAAGAGAAGAAGAAGGAGCAG	GAAAAAGAGAGGGGAAGGAGGGAAAGGAGAAGGGGAGAAGGGGAAGGAGCAG	hap_c01	hap_c02	GG	2	NA	CC	NA	-/-
discovery	control	dog_1765	GAAAAAAAGGGGGGGGGGAGGGGGAGGGGAAGAAGAGAAGAAGAAGGAGCAG	GAAAAAAAGGGGGGGGGGAGGGGGAGGGGAAGAAGAGAAGAAGAAGGAGCAG	hap_c01	hap_c01	GG	2	NA	CC	NA	-/-
discovery	control	dog_1766	ATGAAAGAGAGAGGGGGGGGGGGGAGGAAAGGGAGAGAAGAGGGAGGAGCGG	GAAAAAAAGGGGGGGGGGAGGGGGAGGGGAAGAAGAGAAGAAGAAGGAGCAG	hap_c03	hap_c01	GG	2	NA	CC	NA	-/-
discovery	control	dog_1771	ATGAAAGAGAAAGAGAGGAGAGGGAGGAAAAGGGGAGAAGAGGGAGGAGCAG	GAAAAAAAGGAGGGGGGGGGAGGGCGAAGAAGGAGGGGAGGGGGAGAAGCGG	hap_c27	hap_c07	GG	2	NA	CC	CC	-/-
discovery	control	dog_1776	GAAAAAAAGGAGGGGGGGGGAGGGCGAAGAAGGAGGGGAGGGGGAGGAGAAG	GAAAAAAAGGGGGGGGGGAGGGGGAGGGGAAGAAGAGAAGAAGAAGGAGCAG	hap_c10	hap_c01	GG	2	NA	CC	NA	-/-
discovery	control	dog_1777	ATGAAAGAGAGAGGGGGGGGGGGGAGGAAAGGGAGAGAAGAGGGAGGAGCGG	GAAAAAAAGGAGGGGGGGGGAGGGCGAAGAAGGAGGGGAGGGGGAGGAGAAG	hap_c03	hap_c10	GG	2	NA	CC	NA	SINE/-
discovery	control	dog_1782	GAAAAAAAGGGGGGGGGGAGGGGGAGGGGAAGAAGAGAAGAAGAAGGAGCAG	GAAAAAAAGGAGGGGGGGGGAGGGCGAAGAAGGAGGGGAGGGGGAGAAGCGG	hap_c01	hap_c07	GG	2	NA	CC	NA	-/-
discovery	control	dog_1786	ATAAAAGAGAGGGGGAGAAAGGGGAGGAGAAGGAGGGAAGGGGAAGGAACGG	GAGAAAGAGGGAGGGAGGGAGGAGAGGGGAAAGGGGAAACGGGGAGGAACAG	hap_c09	hap_c11	GG	2	NA	CC	NA	-/-
discovery	control	dog_1789	GAGAAAGAGAGGGGGGGGGGAGAGAGGAAAAGGAGGGAAGAGGGAGGAGCAG	ATGAAAGAGAGAGGGGGGGGGGGGAGGAAAGGGAGAGAAGAGGGAGGAGCGG	hap_c04	hap_c03	GG	2	NA	CC	NA	-/-
discovery	control	dog_1790	GAAAAAGAGAGGGGGAGGGGAGGGAGGGGAAGGGGAGGGCGAGAAGGAGCGG	GAAAAAGAGAGAGGGGGGAAAGAGAGGAGAAGGGGAGAACGGGGAGAAGCGG	hap_c86	hap_c17	GG	2	NA	CC	NA	-/-
discovery	control	dog_1792	GAGAAAGAGAGAGGGGGGGGAAGGAGGGGAAAGGAAGAAGAGGGAGGAGAAG	GAGAAAGAGGGAGGGGGGAGGGGGCGAAGAAGAAGGGAAGGAGGAGGCACAA	hap_c33	hap_c70	GG	2	NA	CC	NA	-/-
discovery	control	dog_1794	GTGAAAGAGAGAGGGAGAAGAGAGCGGAAAAGAAGGGGAGGGGAAGGAAAAG	GAGAAAGAGAGAGAGAGGAGAGGGCAAGAAAGGGGAGAAGAGAGAGGAAAAG	hap_c13	hap_c22	GG	2	NA	CC	NA	-/-
discovery	control	dog_1796	GAGAAAGAGAGGGGGAGAGGAGGGAGGGGAAGGGGAGAAGAGGGAGGAGAAG	GAGAAAGAGAGGGGGAGAGGAGGGAGGGGAAGGGGAGAAGAGGGAGGAGAAG	hap_c08	hap_c08	GG	2	NA	CC	NA	-/-
discovery	control	dog_1803	GAAGAGAGGAGGAGAAGGAGAGGGAGGAGCAGGAGAGAAGAAGAGAAAACAA	GAGAAAGAGAGAGGGGGGGGAGGGAGGAAAGGGGGAGAAGGAGGAAGCGCGG	hap_c06	hap_c75	GG	2	NA	CC	NA	-/-
discovery	control	dog_1804	GAGAAAGAGAGGGGGGGGGGAGAGAGGAAAAGGAGAGAAGAGGGAGGAGCGG	GAAAAAGAGAGGGGAAGGAGGGAAAGGAGAAGGGGAGAAGGGGAAGGAGCAG	hap_c123	hap_c02	GG	2	NA	CC	NA	SINE/-
discovery	control	dog_1806	GAGAAAGAGAGGGGGGGGGGAGAGAGGAAAAGGAGAGAAGGGGAAGGAGCAG	GAAAAAAAGGGGGGGGGGAGGGGGAGGGGAAGAAGAGAAGAAGAAGGAGCAG	hap_c122	hap_c01	GG	2	NA	CC	NA	-/-
discovery	control	dog_1807	ATAGGGGAGGGGAGAAGAAAAGGGAGGAGAAGGGGAGAAGGAGGAGGAGCAG	ATAGGGGAGGGGAGAAGAAAAGGGAGGAAAAGGGGAGAAGGGGGAGAAGCAG	hap_c228	hap_c96	GG	2	NA	CC	NA	SINE/SINE
discovery	control	dog_1808	GAAAAAGAGAGGGGAAGGAGGGAAAGGAGAAGGGGAGAAGGGGAAGGAGCAG	GAAAAAGAGAGGGGAAGGAGGGAAAGGAGAAGGGGAGAAGGGGAAGGAGCAG	hap_c02	hap_c02	GG	2	NA	CC	NA	-/-
discovery	control	dog_1810	GAAGGGGAGAGAAGAAGGAGGGAGAGGGGCAGGAGGGAAGAGGGAGGAGCAG	GAAAAAGAGAGGGGGAGGGGAGGGAGGAGAAGAGGAGGACGGGGAGGAGCAG	hap_c15	hap_c05	GG	2	NA	CC	NA	-/-
discovery	control	dog_1814	GAAGAGAAGAGAGGAAGGGGAGAGAGGGGAGGGGGAGAAGAGAGAGGAAAAG	GAAAAAGAGAGAGGGGGGAAAGAGAGGAGAAGGGGAGAAGAGGGAGGAACAG	hap_c24	hap_c59	GG	2	NA	CC	NA	SINE/SINE
discovery	control	dog_1818	GAAGAGAGAAGGGAGAGGAGAGGGCGAAGCAGAAGAAAAGGGGGAGGAGCGG	GAGAAAGAGGGGGGGAGGGGAGGGAGGGGAAGGGGAGAAGAGGGGAAAGCAA	hap_c47	hap_c69	GG	2	NA	CC	NA	SINE/SINE
discovery	control	dog_1819	GAAAAAGAGAGAGGGGGGAAAGAGAGGAGAAGGGGAGAAGAGGGAGGAACAG	GAAGAGAAGAGAGGAAGGGGAGAGAGGGGAGGGGGAGAAGAGAGAGGAAAAG	hap_c59	hap_c24	GG	2	NA	CC	NA	SINE/SINE
discovery	control	dog_1821	GAGAAAGAGAGGGGGAGAGGAGGGAGGGGAAGGGGAGAAGAGGGAGGAGAAG	GAAAAAAAGAGGGGGGGGAGGGGGAGGGGAAGAAGAGAAGAAGAAGGAGCAG	hap_c08	hap_c12	GG	2	NA	CC	NA	SINE/-
discovery	control	dog_1823	GAGAAAGAGAGAGGGGGGGGAAGGAGGGGAAAGGAAGAAGAGGGAGGAGCAG	GAAGAGAGAAGGGGGGGGAGAAAAAGGGGAAGGGGGGGAGGGGGAGAAGCAG	hap_c138	hap_c167	GG	2	NA	CC	NA	-/-
discovery	control	dog_1824	ATGAAAGAGAAAGAGAGGAGAGGGAGGAAAAGGAGGGAAGAGGGAGGAGCAG	GAAAAAGAGAGGGGGAGGGGAGGGAGGAGAAGAGGAGGACGGGGAGGAGCAG	hap_c227	hap_c05	GG	2	NA	CC	NA	-/-
discovery	control	dog_1828	GAAGGGGAGGGGAGAAGGGGAGAGAGGGGAGGGGGAGAAGGGGGAGGAGCAG	GTGAAAGAGAGAGGGGGGGGGGGGAGGAAAGGGAGAGAAGAGGGAGGAGCGG	hap_c26	hap_c64	GG	2	NA	CC	NA	-/-
discovery	control	dog_1832	GAAAAAAAGAGGGGGGGGAGGGGGAGGGGAAGAAGAGAAGAAGAAGGAGCAG	GAAGGGAGGAAGAGAAGGGGAGGGCGAAGAAGAAGAGAAGAGGGAGGAGCGG	hap_c12	hap_c81	GG	2	NA	CC	NA	SINE/-
discovery	control	dog_1835	GAAAAAGAGAGAGGGGGGAGAAAACAAGGCAAAGGAGAAGGGGGAGGAGAAG	GAAGAGAAGAGAGGAAGGGGAGAGAGGGGAGGGGGAGAAGAGAGAGGAAAAG	hap_c194	hap_c24	GG	2	NA	CC	NA	SINE/SINE
discovery	control	dog_1841	GAAAAAGAGAGGGGGAGGGGAGGGAGGAGAAGAGGAGGACGGGGAGGAGCAG	GAAAAAAAGGAGGGGGGGGGAGGGCGAAGAAGGAGGGGAGGGGGAGAAGCGG	hap_c05	hap_c07	GG	2	NA	CC	NA	SINE/-
discovery	control	dog_1842	GAGAAAGAGAGGGGGGGGGGAGAGAGGAAAAGGAGGGAAGAGGGAGGAGCAG	GAAAAAGAGAGGGGAAGGAGGGAAAGGAGAAGGGGAGAAGGGGAAGGAGCAG	hap_c04	hap_c02	GG	2	NA	CC	NA	-/-
discovery	control	dog_1843	GTGAAAGAGAGAGGGAGAAGAGAGCGGAAAAGAAGGGGAGGGGAAGGAAAAG	ATAGGGGAGGGGAGAAGAAAAGGACGAAAAAGGGGAGAAGGAGGAGGAGCAG	hap_c13	hap_c230	GG	2	NA	CC	NA	-/-
discovery	control	dog_1845	GAAGAGAAGAGAGGAAGGGGAGAGAGGGGAGGGGGAGAAGAGAGAGGAAAAG	GAGAAAGAGAGGGGGGGGGGAGAGAGGAAAGGGAGAGAAGAGGGAGGAGCGG	hap_c24	hap_c53	GG	2	NA	CC	NA	-/-
discovery	control	dog_1847	GAAGGGAGGAAGGGGGGGGGAAAACAAGAAAGGGGAGAAGAAGGAGGAGCAG	ATAAAAGAGAGGGGGAGAAAGGGGAGGAGAAGGAGGGAAGGGGAAGGAACGG	hap_c43	hap_c09	GG	2	NA	CC	NA	-/-
discovery	control	dog_1849	AAAGGGAGGAAGGGGAGAAGGGGGCAAGAAAGGGGAGAAGAGAGAGGAAAAG	GTGAAAGAGAGAGGGAGAAGAGAGCGGAAAAGAAGGGGAGGGGAAGGAAAAG	hap_c29	hap_c13	GG	2	NA	CC	NA	-/-
discovery	control	dog_1850	GAAAAAAAGGGGGGGGGGAGGGGGAGGGGAAGAAGAGAAGAAGAAGGAGCAG	GAAAAAGAGAGGGGAAGGAGGGAAAGGAGAAGGGGAGAAGGGGAAGGAGCAG	hap_c01	hap_c02	GG	2	NA	CC	NA	-/-
discovery	control	dog_1851	GAAAAAGAGAGGGGAAGGAGGGAAAGGAGAAGGGGAGAAGGGGAAGGAGCAG	GAGAAAGAGAGGGGGGGGGGAGAGAGGAAAAGGAGGGAAGAGGGAGGAGCAG	hap_c02	hap_c04	GG	2	NA	CC	NA	-/-
discovery	control	dog_1854	ATAGGGGAGGGGAGAAGAAAAGGACGAAAAAGGGGAGAAGAGGGAAGCGCGG	GAAGGGGAGAGAAGAAGGAGAGGGCGAAGAAGAAGAGAAGAGGGAGGAGCGG	hap_c98	hap_c158	GG	2	NA	CC	NA	SINE/SINE
discovery	control	dog_1855	GAGAAAGAGAGGGGGAGAGGAGGGAGGGGAAGGGGAGAAGAGGGAGGAGAAG	GAAAAAAAGAGGGGGGGGAGGGGGAGGGGAAGAAGAGAAGAAGAAGGAGCAG	hap_c08	hap_c12	GG	2	NA	CC	NA	-/-
discovery	control	dog_1860	GAAAAAGAGAGGGGAAGGAGGGAAAGGAGAAGGGGAGAAGGGGAAGGAGCAG	GAAAAAAAGGGGGGGGGGAGGGGGAGGGGAAGAAGAGAAGAAGAAGGAGCAG	hap_c02	hap_c01	GG	2	NA	CC	NA	SINE/-
discovery	control	dog_1861	GAAAAAGAGAGGGGGAGGGGAGGGAGGAGAAGAGGAGGACGGGAAGGAGCAG	GAAAAAAAGGAGGGGGGGGGAGGGCGAAGAAGGAGGGGAGGGGGAGAAGCGG	hap_c181	hap_c07	GG	2	NA	CC	NA	-/-
discovery	control	dog_1867	ATGAAAGAGGGGGGGAGGAGAGGGAGGAAAAGAAGAGAACGGGGAGGAGCGG	GAAGAGAGGAGGAGAAGGAGAGGGAGGAGAAGGAGAAGGGAGGGGAAAGCAA	hap_c28	hap_c45	GG	2	NA	CC	NA	SINE/-
discovery	control	dog_1869	GAGAAAGAGAGGGGGAGAGGAGGGAGGGGAAGGGGAGAAGAGGGAGGAGAAG	ATAAAAGAGAGGGGGAGAAAGGGGAGGAGAAGGAGGGAAGGGGAAGGAACGG	hap_c08	hap_c09	GG	2	NA	CC	NA	-/-
discovery	control	dog_1871	GAGAAAGAGAGGGGGAGAGGAGGGAGGGGAAGGGGAGAAGAGGGAGGAGAAG	ATAAAAGAGAGGGGGAGAAAGGGGAGGAGAAGGAGGGAAGGGGAAGGAACGG	hap_c08	hap_c09	GG	2	NA	CC	NA	-/-
discovery	control	dog_1872	GAAAAAAAGGGGGGGGGGAGGGGGAGGGGAAGAAGAGAAGAAGAAGGAGCAG	GAAGAGAGAAGGGAGAGGGAAGGGAGGGGCAGGGAAGAAGGAGAAGGAGAAG	hap_c01	hap_c83	GG	2	NA	CC	NA	-/-
discovery	control	dog_1873	GAAAAAAGGGGGGGGAGGGGAGAGAGGGGCAGGAGGAAAGAAGGAGGAGCAG	GAAAAAGAGAGGGGAAGGAGGGAAAGGAGAAGGGGAGAAGGGGAAGGAGCAG	hap_c198	hap_c02	GG	2	NA	CC	NA	-/-
discovery	control	dog_1874	GAGAAAGAGAGAGGGGGGGGAGAGAGGGGCAGGAGAGAAGGGGGAGGCGAAA	GAGAAAAAGGAGGGGGGGAAGGAGAGGAGAAGGGGAGAAGGGGGAGGAGAAA	hap_c54	hap_c19	GG	2	NA	CC	NA	SINE/SINE
discovery	control	dog_1875	GAAAAAAAGGGGGGGGGGAGGGGGAGGGGAAGAAGAGAAGAAGAAGGAGCAG	AAAGGGAGGAAGGGGAGAAGGGGGCAAGAAAGGGAGGGGCGAGAAGGAGCAG	hap_c01	hap_c241	GG	2	NA	CC	NA	-/-
discovery	control	dog_1876	GAAGGGGAGAGAAGAAGGAGGGAGAGGGGAAGGGAGGGACGGGGAGGAACAA	GAAAAAAAGAGGGGGGGGAGGGGGAGGGGAAGAAGAGAAGAAGAAGGAGCAG	hap_c23	hap_c12	GG	2	NA	CC	NA	-/-
discovery	control	dog_1877	GAGAAAGAGAGGGGGGGGGGAGAGAGGAAAAGGAGGGAAGAGGGAGGAGCAG	GAAGGGGAGAGAAGAAGGAGGGAGAGGGGAAGGGAGGGACGGGGAGGAACAA	hap_c04	hap_c23	GG	2	NA	CC	NA	SINE/-
discovery	control	dog_1880	ATGAAGAAGGGGAGAAGGAAAAAACAAGAAAGGGGAGGGCGGGGAGGAGCAG	GAAAAAGAGAGGGGGAGGGGAGGGAGGAGAAGAGGAGGACGGGGAGGAGCAG	hap_c94	hap_c05	GG	2	NA	CC	NA	SINE/-
discovery	control	dog_1882	ATGAAAGAGAGAGGGGGGGGGGGGAGGAAAGGGAGAGAAGAGGGAGGAGCGG	GAGAAAGAGAGAGGGGGGGGAGGAAGGAGAAGGGGAGAAGGGGGAGAAGCAG	hap_c03	hap_c31	GG	2	NA	CC	NA	SINE/-
discovery	control	dog_1888	GAAAAAAAGGGGGGGGGGAGGGGGAGGGGAAGAAGAGAAGAAGAAGGAGCAG	GAAAAAGAGAGAGGGGGGAAAGAGAGGAGAAGGGGAGAACGGGGAGAAGCGG	hap_c01	hap_c17	GG	2	NA	CC	NA	-/-
discovery	control	dog_1890	GAAGAGAGGAGGAGAAGGAGAGGGAGGAGCAGGAGAGAAGAAGAGAAAACAA	GAGAAAGAGAGAGGGGGGGGAGAGCGAAAAAGGGAAGAAGGGAGAGGAACAA	hap_c06	hap_c14	GG	2	NA	CC	NA	-/-
discovery	control	dog_1894	ATGAAAGAGAGAGGGGGGGGGGGGAGGAAAGGGAGAGAAGAGGGAGGAGCGG	GAAAAAAAGGGGGGGGGGAGGGGGAGGGGAAGAAGAGAAGAAGAAGGAGCAG	hap_c03	hap_c01	GG	2	NA	CC	NA	-/-
discovery	control	dog_1896	GAAGAGAAGAGAGGAAGGGGAGAGAGGGGAGGGGGAGAAGAGAGAGGAAAAG	ATAAAAAAGGAGGGGGGGGGAGAACGAAGCAAGGAGGGGCGAGAAGGAGCAG	hap_c24	hap_c236	GG	2	NA	CC	NA	SINE/SINE
discovery	control	dog_1897	GAGAAAAAGGAGGGGGGGAAGGAGAGGAGAAGGGGAGAAGGGGGAGGAGAAA	GTAAAAAAGGAGGGAAGGAGGGAGAGGGGAAGGGAGGGGCGGGGAGGAGCGG	hap_c19	hap_c104	GG	2	NA	CC	NA	SINE/SINE
discovery	control	dog_1898	GAAAAAGAGAGGGGAAGGAGGGAAAGGAGAAGGGGAGAAGGGGAAGGAGCAG	GAAGAGAGGAGGAGAAGGAGAGGGAGGAGCAGGAGAGAAGAAGAGAAAACAA	hap_c02	hap_c06	GG	2	NA	CC	NA	-/-
discovery	control	dog_1899	GAAAAAAAGAGGGGGGGGAGGGGGAGGGGAAGAAGAGAAGAAGAAGGAACAG	GAAAAAAAGGAGGGGGGGGGAGGGCGGGGAAGGGAAGAAGGGAGAGGAACAA	hap_c93	hap_c90	GG	2	NA	CC	NA	-/-
discovery	control	dog_1904	GAAGGGGAGAGAAGAAGGAGGGAGAGGGGCAGGAGGGAAGAGGGAGGAGCAG	GAAAAAAAGGGGGGGGGGAGGGGGAGGGGAAGAAGAGAAGAAGAAGGAGCAG	hap_c15	hap_c01	GG	2	NA	CC	NA	-/-
discovery	control	dog_1905	GAAAAAGAGAGGGGGAGGGGAGGGAGGAGAAGAGGAGGACGGGGAGGAGCAG	GAAAAAGAGAGGGGGAGAAGGGGGAGGGGAAGAGGAGAAGAGGGAGGAGCGG	hap_c05	hap_c20	GG	2	NA	CC	NA	-/-
discovery	control	dog_1909	GAGAAAGAGAGGGGGAGAGGAGAGAGGGGAAAGGGGAAACGGGGAGGAACAG	GAAGGGAGGAAGGGGGGGGGAAAACAAGAAAGGGGAGAAGAAGGAGGAGCAG	hap_c127	hap_c43	GG	2	NA	CC	NA	-/-
discovery	control	dog_1910	GTGAAAGAGAGAGGGAGAAGAGAGCGGAAAAGAAGGGGAGGGGAAGGAAAAG	GAGAAAGAGAGGGGGAGAGGAGGGAGGGGAAGGGGAGAAGAGGGAGGAGAAG	hap_c13	hap_c08	GG	2	NA	CC	NA	-/-
discovery	control	dog_1914	GAAAAAAAGGGGGGGGGGAGGGGGAGGGGAAGAAGAGAAGAAGAAGGAGCAG	GAAAAAGAGAGGGGGAGGGGAGGGAGGAGAAGAGGAGGACGGGGAGGAGCAG	hap_c01	hap_c05	GG	2	NA	CC	NA	-/-
discovery	control	dog_1915	GAAAAAGAGAGAGGGGGGAAAGAGAGGAGAAGGGGAGAACGGGGAGAAGCGG	GAGAAAGAGAGGGGGGGGGGAGAGAGGAAAAGGAGGGAAGAGGGAGGAGCAG	hap_c17	hap_c04	GG	2	NA	CC	NA	SINE/-
discovery	control	dog_1917	GAGAAAGAGAGGGGGAGAGGAGGGAGGGGAAGGGGAGAAGAGGGAGGAGAAG	GAAGGGGAGGGGAGAAGGGGAGGACGAGGAAGAGGGGAACGGGAAGAAACAA	hap_c08	hap_c151	GG	2	NA	CC	NA	-/-
discovery	control	dog_1922	GAAAAAGAGAGGGGGAGGGGAGGGAGGAGAAGAGGAGGACGGGGAGGAGCAG	GAAAAAAAGGGGGGGGGGAGGGGGAGGGGAAGAAGAGAAGAAGAAGGAGCAG	hap_c05	hap_c01	GG	2	NA	CC	NA	SINE/-
discovery	control	dog_1924	GAGAAAGAGAGGGGGGGGGGAGAGAGGAAAAGGAGGGAAGAGGGAGGAGCAG	GAAAAAAAGGGGGGGGGGAGGGGGAGGGGAAGAAGAGAAGAAGAAGGAGCAG	hap_c04	hap_c01	GG	2	NA	CC	NA	-/-
discovery	control	dog_1926	GTGAAAGAGAGAGGGAGAAGAGAGCGGAAAAGAAGGGGAGGGGAAGGAAAAG	GTGAAAGAGAGAGGGAGAAGAGAGCGGAAAAGAAGGGAAGGGGAAGGAACGG	hap_c13	hap_c102	GG	2	NA	CC	NA	-/-
discovery	control	dog_1927	ATAAAAGAGAGGGGGAGAAAGGGGAGGAGAAGGAGGGAAGGGGAAGGAACGG	GAAAAAAAGGGGGGGGGGAGGGGGAGGGGAAGAAGAGAAGAAGAAGGAGCAG	hap_c09	hap_c01	GG	2	NA	CC	NA	-/-
discovery	control	dog_1928	GAAAAAGAGAGGGGGAGGGGAGGGAGGAGAAGAGGAGGACGGGGAGGAGCAG	GAAAAAGAGAGGGGAAGGAGGGAAAGGAGAAGGGGAGAAGGGGAAGGAGCAG	hap_c05	hap_c02	GG	2	NA	CC	NA	SINE/-
discovery	control	dog_1929	ATAAAAGAGAGGGGGAGAGGAGGGCGAAGAAGGAGGGAAGAGGGAGGAGCGG	GAAGGGAGGAAGGGGGGGGGAAAACAAGAAAGGGGAGAAGAAGGAGGAGCAG	hap_c234	hap_c43	GG	2	NA	CC	NA	-/-
discovery	control	dog_1931	GAAAAAGAGAGGGGGAGAAGGGGGAGGGGAAGAGGAGAAGAGGGAGGAGCGG	GAAAAAAAGGAGGGGGGGGGAGGGCGAAGAAGGAGGGGAGGGGGAGGAGAAG	hap_c20	hap_c10	GG	2	NA	CC	NA	-/-
discovery	control	dog_1932	GAGAAGGAGAGAAGAAGGAGGGAGAGGGGAAGGGAGGGGCGAGAAGGAGCGG	GAAGAGAGAAGGGAGAGGAGAGGACGAAAAAGGGGAGAAGGGGGAGGCACAG	hap_c67	hap_c170	GG	2	NA	CC	NA	SINE/SINE
discovery	control	dog_1934	GAGAAAGAGAGGGGGGGGGGAGAGAGGAAAAGGAGGGAAGAGGGAGGAGCAG	AAGAAAGAGGGAGGGGGGGAGGAGAGGGGAAAGGGGAAACGGGGAGGAACAG	hap_c04	hap_c238	GG	2	0	CC	NA	-/-
discovery	control	dog_1936	GAGAAAGAGAGGGGGAGAGGAGGGAGGGGAAGGGGAGAAGAGGGAGGAGAAG	GAAAAAAAGAGGGGGGGGAGGGGGAGGGGAAGAAGAGAAGAAGAAGGAACAG	hap_c08	hap_c93	GG	2	NA	CC	NA	-/-
discovery	control	dog_1937	GAGAAAGAGAGGGGGGGAAAAGGGAGGGGAAGAAGAAAACGAGAAGGAGCAG	GAGAAAGAGAGGGGGGGAAAAGGGAGGGGAAGAAGAAAACGAGAAGGAGCAG	hap_c71	hap_c71	GG	2	NA	CC	NA	SINE/SINE
discovery	control	dog_1938	GAAAAAAAGGGGGGGGGGAGGGGGAGGGGAAGAAGAGAAGAAGAAGGAGCAG	GAAAAAAAGGGGGGGGGGAGGGGGAGGGGAAGAAGAGAAGAAGAAGGAGCAG	hap_c01	hap_c01	GG	2	NA	CC	NA	-/-
discovery	control	dog_1939	ATGAAAGAGAAAGAGAGGAGAGGGAGGAGAAGAGGAGGACGGGGAGGAGCAG	GAAAAAAAGGGGGGGGGGAGGGGGAGGGGAAGAAGAGAAGAAGAAGGAGCAG	hap_c51	hap_c01	GG	2	NA	CC	NA	SINE/-
discovery	control	dog_1940	ATGAAAGAGAGAGGGGGGGGGGGGAGGGGAAGAAGAGAAGAAGAAGGAGCAG	GAGAAAGAGAGGGGGGGGGGAGAGAGGAAAAGGAGGGAAGAGGGAGGAGCAG	hap_c60	hap_c04	GG	2	NA	CC	NA	SINE/SINE
discovery	control	dog_1943	GTGAAAGAGAGAGGGGGGGGGGGGAGGAAAGGGAGAGAAGAGGGAGGAGCGG	ATGAAAGAGAGAGGGGGGGGGGGGAGGAAAGGGAGAGAAGAGGGAGGAGCGG	hap_c64	hap_c03	GG	2	NA	CC	NA	SINE/-
discovery	control	dog_1946	GAAAAAAAGGGGGGGGGGAGGGGGAGGGGAAGAAGAGAAGAAGAAGGAGCAG	GAAAAAGAGAGAGGGGGGAAAGAGAGGAGAAGGGGAGAACGGGGAGAAGCGG	hap_c01	hap_c17	GG	2	NA	CC	NA	SINE/-
discovery	control	dog_1947	GAAAAAGAGAGGGGGAGGGGAGGGAGGAGAAGAGGAGGACGGGGAGGAGCAG	GAGAAAAAGGAGGGGGGGGGAGAGAGGAAAGGGGGAGAAGGAGGAAGCGCGG	hap_c05	hap_c148	GG	2	NA	CC	NA	-/-
discovery	control	dog_1953	GAAGGGGAGAGAAGAAGGAGGGAGAGGGGCAGGAGGGAAGAGGGAGGAGCAG	GAAAAAAAGGAGGGGGGGGGAGGGCGAAGAAGGAGGGGAGGGGGAGGAGAAG	hap_c15	hap_c10	GG	2	NA	CC	NA	-/-
discovery	control	dog_1954	GAAAAAAAGGGGGGGGGGAGGGGGAGGGGAAGAAGAGAAGAAGAAGGAGCAG	GAAAAAGAGAGGGGAAGGAGGGAAAGGAGAAGGGGAGAAGGGGAAGGAGCAG	hap_c01	hap_c02	GG	2	NA	CC	NA	-/-
discovery	control	dog_1959	GAGAAAGAGAGAGGGGGGGAGGAGAGGAAAAGGAGGGAAGGAGGAGGCACAA	ATGAAAGAGGGGGGGAGGAGAGGGAGGAAAAGAAGAGAACGAGAAGGAGCAG	hap_c56	hap_c219	GG	2	NA	CC	NA	SINE/SINE
discovery	control	dog_1960	GAAAAAAAGGAGGGGGGGGGAGAACGAAAAAGGGGAGAAGGGGGAGGAGCAG	GAGAAAAAGGAGGGGGGGAAGGAGAGGAGAAGGGGAGAAGGAGAAGGAGCGG	hap_c208	hap_c149	GG	2	NA	CC	NA	SINE/-
discovery	control	dog_1962	GAGAAAAAGGAGGGGGGGGGAGAGAGGAAAAGGAGAGAAGAGGGAAGAGCAG	ATGAAAGAGAGAGGGGGGGGGGGGAGGAAAGGGAGAGAAGAGGGAGGAGCGG	hap_c41	hap_c03	GG	2	NA	CC	NA	-/-
discovery	control	dog_1964	GAGAAAGAGAGAGGGGGGGGAAGGAGGGGAAAGGAAGAAGAGGGAGGAGAAG	GAGAAAGAGGGAGGGGGGAGGGGGCGAAGAAGAAGGGAAGGAGGAGGCACAA	hap_c33	hap_c70	GG	2	NA	CC	NA	SINE/-
discovery	control	dog_1966	GAGGAGAAGAGAGGGGGGGGAGAGCGGAGAAGGGGAGAAGAAGAAGGAGCGG	GAAGGGGAGAGAAGAAGGAGGGAGAGGGGAAGGGGGAAACGGGGAGGAACAG	hap_c108	hap_c42	GG	2	NA	CC	NA	-/-
discovery	control	dog_1967	GAAAAAGAGAGGGGGAGGGGAGGGAGGAGAAGAGGAGGACGGGGAGGAGCAG	ATGAAAGAGAGAGGGGGGGGGGGGAGGAAAGGGAGAGAAGAGGGAGGAGCGG	hap_c05	hap_c03	GG	2	NA	CC	NA	SINE/-
discovery	control	dog_1969	GAAAAAGAGAGGGGGAGAAGGGGGAGGGGAAGAGGAGAAGAGGGAGGAGCGG	GAAAAAGAGAGGGGGAGAAGGGGGAGGGGAAGAGGAGAAGAGGGAGGAGCGG	hap_c20	hap_c20	GG	2	NA	CC	NA	-/-
discovery	control	dog_1971	ATGAAAGAGAAAGAGAGGAGAGGGAGGAAAAGGGGAGAAGAGGGAGGAGCAG	GAAAAAGAGAGGGGGAGGGGAGGGAGGAGAAGAGGAGGACGGGGAGGAGCAG	hap_c27	hap_c05	GG	2	NA	CC	NA	SINE/-
discovery	control	dog_1973	GAAAAAAAGGGGGGGGGGAGGGGGAGGGGAAGAAGAGAAGAAGAAGGAGCAG	GAAAAAAAGGGGGGGGGGAGGGGGAGGGGAAGAAGAGAAGAAGAAGGAGCAG	hap_c01	hap_c01	GG	2	NA	CC	NA	SINE/-
discovery	control	dog_1975	ATGAAAGAGAGAGGGGGGGGGGAGAGGAAAAGGAGGGAAGAGGGAGGAGCAG	GAAAAAAAGGAGGGGGGGGGAGGGCGAAGAAGGAGGGGAGGGGGAGGAGAAG	hap_c50	hap_c10	GG	2	NA	CC	NA	SINE/-
discovery	control	dog_1977	GAAGGGGAGAGAAGAAGGAGGGAGAGGGGAAGGGAGGGACGGGGAGGAACAA	GAAAAAAAGGGGGGGGGGAGGGGGAGGGGAAGAAGAGAAGAAGAAGGAGCAG	hap_c23	hap_c01	GG	2	NA	CC	NA	-/-
discovery	control	dog_1980	GAGAAAGAGAGAGGGGGGGGAGAGCGAAAAAGGGAAGAAGGGAGAGGAACAA	GAAAAAAAGGAGGGGGGGAGAGGGAGGAGAAGGGGAGAACAGGGGAAAGCAA	hap_c14	hap_c91	GG	2	NA	CC	NA	SINE/SINE
discovery	control	dog_1982	GAAAAAAAGGGGGGGGGGAGGGGGAGGGGAAGAAGAGAAGAAGAAGGAGCAG	GAAAAAGAGAGGGGGAGAAGGGGGAGGGGAAGAGGAGAAGAGGGAGGAGCGG	hap_c01	hap_c20	GG	2	NA	CC	NA	-/-
discovery	control	dog_1984	GAAAAAAAGGGGGGGGGGAGGGGGAGGGGAAGAAGAGAAGAAGAAGGAGCAG	GAAAAAAAGGGGGGGGGGAGGGGGAGGGGAAGAAGAGAAGAAGAAGGAGCAG	hap_c01	hap_c01	GG	2	NA	CC	NA	-/-
discovery	control	dog_1985	GAAAAAAAGGAGGGGGGGGGAGGGCGAAGAAGGAGGGGAGGGGGAGGAGAAG	GAAAAAAAGGGGGGGGGGAGGGGGAGGGGAAGAAGAGAAGAAGAAGGAGCAG	hap_c10	hap_c01	GG	2	NA	CC	NA	-/-
discovery	control	dog_1986	ATAGGGGAGGGGAGAAGAAAGGAAAGGAGAAGGAGAAAACGGGGAGGAAAAG	GAAAAAGAGAGAGGGGGGGGAGAGAGGGGAGGGGGGGGAGAGGGAGGAACAG	hap_c62	hap_c34	GG	2	NA	CC	NA	SINE/SINE
discovery	control	dog_1987	GAAAAAAAGGGGGGGGGGAGGGGGAGGGGAAGAAGAGAAGAAGAAGGAGCAG	GAGAAAGAGAGGGGGGGGGGAGAGAGGAAAAGGAGGGAAGAGGGAGGAGCAG	hap_c01	hap_c04	GG	2	NA	CC	NA	-/-
discovery	control	dog_1988	ATAGGGGAGGGGAGAAGAAAAGGACGAAAAAGGGGAGAAGAGGGAGGAACAG	GAGAAAGAGAGGGGGGGGGGAGGGAGGAAAAGGGGAGAAGGGGGAGAAGCAG	hap_c231	hap_c119	GG	2	NA	CC	NA	-/-
discovery	control	dog_1991	GAAGAGAGAAGGGAGAGGAGAGGGCGAAGCAGAAGAAAAGGGGGAGGAGCGG	GAAAAAGAGAGGGGGAGGAGGGGGAGGGGAAGGGGAGGGCGAGAAGGAGCAG	hap_c47	hap_c184	GG	2	NA	CC	NA	SINE/SINE
discovery	control	dog_1996	GAAAAAGAGAGGGGAAGGAGGGAAAGGAGAAGGGGAGAAGGGGAAGGAGCAG	GAAAAAAAGGAGGGGGGGGGAGGGCGAAGAAGGAGGGGAGGGGGAGGAGAAG	hap_c02	hap_c10	GG	2	NA	CC	NA	-/-
discovery	control	dog_1998	GAAAAAGAGAGGGGAAGGAGGGAAAGGAGAAGGGGAGAAGGGGAAGGAGCAG	GAAAAAAAGGGGGGGGGGAGGGGGAGGGGAAGAAGAGAACGGGGAGAAGCGG	hap_c02	hap_c89	GG	2	NA	CC	NA	-/-
discovery	control	dog_2000	ATGAAAGAGAAAGAGAGGAGAGGGAGGAAAAGGGGAGAAGAGGGAGGAACAG	GAAAAAGAGAGGGGAAGGAGGGGGAGGGGAAGAAGAGAAGAAGAAGGAGCAG	hap_c52	hap_c188	GG	2	NA	CC	NA	SINE/-
discovery	control	dog_2001	GAAAAAAAGGGGGGGGGGAGGGGGAGGGGAAGAAGAGAAGAAGAAGGAGCAG	GAAAAAGAGAGGGGGAGAAGGGGGAGGGGAAGAGGAGAAGAGGGAGGAGCGG	hap_c01	hap_c20	GG	2	NA	CC	NA	-/-
discovery	control	dog_2003	GAAAAAAAGGAGGGGGGGGGAGGGCGAAGAAGGAGGGGAGGGGGAGAAGCGG	GAAAAAAAGGGGGGGGGGAGGGGGAGGGGAAGAAGAGAAGAAGAAGGAGCAG	hap_c07	hap_c01	GG	2	NA	CC	NA	-/-
discovery	control	dog_2004	GAAAAAAAGGAGGGGGGGGGAGGGCGAAGAAGGAGGGGAGGGGGAGAAGCGG	GAGAAAGAGGGAGGGGGGGAGGAGAGGGGAAAGGGGAAACGGGGAGGAACAG	hap_c07	hap_c16	GG	2	NA	CC	NA	-/-
discovery	control	dog_2006	GAGAAAGAGGGAGGAAGGGAGGAGAGGGGAAAGGGGAAACGGGGAGGAACAG	GAAAAAGAGAGAGGAAGGGGAGAGAGGGGAGGGGGAGAAGAGGGAGAAGCGG	hap_c18	hap_c88	GG	2	NA	CC	NA	-/-
discovery	control	dog_2007	ATAAAAGAGAGGGGGAGAAAGGGGAGGAGAAGGAGGGAAGGGGAAGGAACGG	GAAAAAAAGGAGGGGGGGGGAGAGCAAGGCAGAAGAGGGCGAGGAGGAACAA	hap_c09	hap_c35	GG	2	NA	CC	NA	-/-
discovery	control	dog_2008	ATGAAAGAGAGAGGGGGGGGGGGGAGGAAAGGGAGAGAAGAGGGAGGAGCGG	GAAAAAGAGAGGGGAAGGAGGGAAAGGAGAAGGGGAGAAGGGGAAGGAGCAG	hap_c03	hap_c02	GG	2	NA	CC	NA	-/-
discovery	control	dog_2009	GAAAAAGAGAGGGGGAGGGGAGGGAGGAGCAGGGGAGAAGAGGGAGGAACAG	GAAAAAAAGGGGGGGGGGAGGGGGAGGGGAAGAAGAGAAGAAGAAGGAGCAG	hap_c180	hap_c01	GG	2	NA	CC	NA	SINE/-
discovery	control	dog_2010	GAAAAGAGGAGGAGGGGGGGAGAGCGAAGAAGGAGAGAAGAGGGAGGCGCGG	GAGAAGAGGAGGAGGGGGGGAGAGCGAAGAAGGAGAGAAGAGGGAGGCGCGG	hap_c176	hap_c111	GG	2	NA	CC	NA	SINE/SINE
discovery	control	dog_2011	AAAGGGAGGAAGGGGAGAAGGGGGCAAGAAAGGGGAGAAGAGAGAGGAAAAG	GAGAAAGAGAGGGGGGGGGGAGAGAGGAAAAGGAGGGAAGAGGGAGGAGCAG	hap_c29	hap_c04	GG	2	NA	CC	NA	-/-
discovery	control	dog_2015	ATGAAAGAGAGAGGGGGGGGGGGGAGGAAAGGGAGAGAAGAGGGAGGAGCGG	GAGAAAGAGAGAGGGGGGGGAGAGAGGGGCAGGAGGGAAGGGGGAGGAGCAG	hap_c03	hap_GG03	GG	2	NA	CC	NA	-/-
discovery	control	dog_2018	GAAAAAAAGGGGGGGGGGAGGGGGAGGGGAAGAAGAGAAGAAGAAGGAGCAG	GAAAAAAAGGGGGGGGGGAGGGGGAGGGGAAGAAGAGAAGAAGAAGGAGCAG	hap_c01	hap_c01	GG	2	NA	CC	NA	-/-
discovery	control	dog_2021	GAAAAAAAGGGGGGGGGGAGGGGGAGGGGAAGAAGAGAAGAAGAAGGAGCAG	ATGAAAGAGAGAGGGGGGGGGGAGAGGAAAAGGAGGGAAGAGGGAGGAGCAG	hap_c01	hap_c50	GG	2	NA	CC	NA	-/-
discovery	control	dog_2024	GAAAAAAAGGAGGGGGGGGGAGGGCGAAGAAGGAGGGGAGGGGGAGGAGAAG	GAAAAAGAGAGGGGGAGGGGAGGGAGGGGAAGGAGAGAAGAGGGAGGAGCGG	hap_c10	hap_c179	GG	2	NA	CC	NA	-/-
discovery	control	dog_2027	GAAAAAAAGGAGGGGGGGGGAGGGCGAAGAAGGAGGGGAGGGGGAGGAGAAG	GAAAAAGAGAGGGGAAGGAGGGAAAGGAGAAGGGGAGAAGGGGAAGGAGCAG	hap_c10	hap_c02	GG	2	NA	CC	NA	-/-
discovery	control	dog_2034	GAGAAAGAGAGAGGGGGGGGAGAGAGGGGCAGGAGGGAAGGGGGAGGAGCAG	GAAAAAAAGGAGGGGGGGGGAGAAAGGAAAAGGAGGGAAGGAGGAGGCACAA	hap_GG03	hap_c209	GG	2	NA	CC	NA	SINE/SINE
discovery	control	dog_2035	GAAAAAAAGGAGGGGGGGGGAGGGCGAAGAAGGAGGGGAGGGGGAGGAGAAG	GAAAAAGAGAGGGGGAGGGGAGGGAGGAGAAGAGGAGGACGGGGAGGAGCAG	hap_c10	hap_c05	GG	2	NA	CC	NA	-/-
discovery	control	dog_2038	GAAGAGAGGAGGAGAAGGAGAGGGAGGAGCAGGAGAGAAGAAGAGAAAACAA	GAGAAAGAGAGGGGGGGGGGAGAGAGGAAAAGGAGGGAAGAGGGAGGAGCAG	hap_c06	hap_c04	GG	2	NA	CC	NA	-/-
discovery	control	dog_2040	GAAGGGGAGAGAAGAAGGAGGGAGAGGGGAAGGGAGGGACGGGGAGGAACAA	GAGAAAGAGGGAGGAAGGGAGGAGAGGGGAAAGGGGAAACGGGGAGGAACAG	hap_c23	hap_c18	GG	2	NA	CC	NA	-/-
discovery	control	dog_2043	GAAGAGAGGAGGAGAAGGAGAGGGAGGAGCAGGAGAGAAGAAGAGAAAACAA	GAGAAAGAGAGGGGGGGGGGAGAGAGGAAAGGGAGAGAAGAGGGAGGAGCGG	hap_c06	hap_c53	GG	2	NA	CC	NA	-/-
discovery	control	dog_2044	GAGAAAGAGGGAGGAAGGGAGGAGAGGGGAAAGGGGAAACGGGGAGGAACAG	GAAGGGGAGGGGAGAAGGGGAGAGAGGGGAGGGGGAGAAGGGGGAGGAGCAG	hap_c18	hap_c26	GG	2	NA	CC	NA	-/-
discovery	control	dog_2046	GAAAAAGAGAGGGGAAGGAGGGAAAGGAGAAGGGGAGAAGGGGAAGGAGCAG	GAAAAAAAGGAGGGGGGGGGAGGGCGAAGAAGGAGGGGAGGGGGAGGAGAAG	hap_c02	hap_c10	GG	2	NA	CC	NA	-/-
discovery	control	dog_2047	GAGAAAGAGAGGGGGAGAGGAGGGAGGGGAAGGGGAGAAGAGGGAGGAGAAG	GAGAAAGAGAGAGGGAGGGAGGAGAGGGGAAAGGGGAAACGGGGAGGAACAG	hap_c08	hap_c143	GG	2	NA	CC	NA	-/-
discovery	control	dog_2048	GAAAAAAAGGGGGGGGGGAGGGGGAGGGGAAGAAGAGAAGAAGAAGGAGCAG	GAAAAAGAGAGGGGAAGGAGGGAAAGGAGAAGGGGAGAAGGGGAAGGAGCAG	hap_c01	hap_c02	GG	2	NA	CC	NA	-/-
discovery	control	dog_2050	GAGAAAGAGGGAGGAAGGGAGGAGAGGGGAAAGGGGAAACGGGGAGGAACAG	GAAGGGGAGGGGAGAAGGGGAGAGAGGGGAGGGGGAGAAGGGGGAGGAGCAG	hap_c18	hap_c26	GG	2	NA	CC	NA	-/-
discovery	control	dog_2051	GAAAAAAAGGGGGGGGGGAGGGGGAGGGGAAGAAGAGAAGAAGAAGGAGCAG	GAGAAAGAGAGGGGGAGAAGGGGGAGGGGAAGAGGAGAAGAGGGAGGAGCGG	hap_c01	hap_c72	GG	2	NA	CC	NA	-/-
discovery	control	dog_2053	GAGAAAGAGGGAGGGGGGGAGGAGAGGGGAAAGGGGAAACGGGGAGGAACAG	ATGAAAGAGAGAGGGGGGGGAAGGCGAAAAAGGGGAGAAGAAGAAGGAGCAG	hap_c16	hap_c224	GG	2	NA	CC	NA	SINE/SINE
discovery	control	dog_2054	GAAAAAAAGGAGGGGGGGGGAGAGAGGAGAAGGGGAGAAGAGGGAGGAGCAA	GAGAAAGAGAGGGGGAGAGGAGGGAGGGGAAGGGGAGAAGAGGGAGGAGAAG	hap_c205	hap_c08	GG	2	NA	CC	NA	-/-
discovery	control	dog_2057	GAAGAGAGGAGGAGAAGGAGAGGGAGGAGCAGGAGAGAAGAAGAGAAAACAA	ATGAAAGAGAGAGGGGGGGGGGGGAGGAAAGGGAGAGAAGGGGGAGAAGCGG	hap_c06	hap_c38	GG	2	NA	CC	NA	-/-
discovery	control	dog_2059	GAAGGGGAGAGAAGAAGGAGGGAGAGGGGCAGGAGGGAAGAGGGAGGAGCAG	GAAAAAAAGGAGGGGGGGGGAGGGCGAAGAAGGAGGGGAGGGGGAGGAGAAG	hap_c15	hap_c10	GG	2	NA	CC	NA	-/-
discovery	control	dog_2062	GAGAAAGAGAGGGGGAGAGGAGGGAGGGGAAGGGGAGAAGAGGGAGGAGAAG	ATGAAAGAGAGAGGGGGGGGGGGGAGGAAAGGGGAAGAAGGAGAAGGAGAAG	hap_c08	hap_c37	GG	2	NA	CC	NA	-/-
discovery	control	dog_2064	GAAAAAGAGAGGGGGAGGGGAGGGAGGAGAAGAGGAGGACGGGGAGGAGCAG	ATGAAAGAGAAAGAGAGGAGAGGGAGGAAAAGGGGAGAAGAGGGAGGAACAG	hap_c05	hap_c52	GG	2	NA	CC	NA	-/-
discovery	control	dog_2065	GAGAAAGAGGGAGGGAGGGAGGAGAGGGGAAAGGGGAAACGGGGAGGAACAG	GAGAAAGAGAGAGAGAGGAGAGGGCAAGAAAGGGGAGAAGAGAGAGGAAAAG	hap_c11	hap_c22	GG	2	NA	CC	NA	-/-
discovery	control	dog_2066	GAGAAAGAGAGGGGGGGGGGAGAGAGGAAAAGGAGGGAAGAGGGAGGAGCAG	GAAAAAGAGAGGGGGAGGGGAGGGAGGAGAAGAGGAGGACGGGGAGGAGCAG	hap_c04	hap_c05	GG	2	NA	CC	NA	-/-
discovery	control	dog_2069	ATGAAAGAGAAAGAGAGGAGAGGGAGGAGAAGAGGAGGACGGGGAGGAGCAG	GAGAAAGAGAGGGGGGGGGGAGAGAGGAAAAGGAGGGAAGAGGGAGGAGCAG	hap_c51	hap_c04	GG	2	NA	CC	NA	-/-
discovery	control	dog_2070	GAAAAAAAGGGGGGGGGGAGGGGGAGGGGAAGAAGAGAAGAAGAAGGAGCAG	GAGAAAGAGAGGGGGGGGGGAGAGAGGAAAAGGAGGGAAGAGGGAGGAGCAG	hap_c01	hap_c04	GG	2	NA	CC	NA	-/-
discovery	control	dog_2072	GAGAAAGAGGGAGGAAGGGAGGAGAGGGGAAAGGGGAAACGGGGAGGAACAG	GAGAAAGAGGGAGGGAGGGAGGAGAGGGGAAAGGGGAAACGGGGAGGAACAG	hap_c18	hap_c11	GG	2	NA	CC	NA	-/-
discovery	control	dog_2073	ATGAAAGAGAGAGGGGGGGGGGGGAGGAAAGGGAGAGAAGAGGGAGGAGCGG	ATAAAAGAGAGGGGGAGGGGAGAGAGGAAAAGGGGAGGACGGGGAGGAGCGG	hap_c03	hap_c233	GG	2	NA	CC	NA	-/-
discovery	control	dog_2074	ATGAAAGAGAGAGGGGGGGGGGGGAGGAAAGGGAGAGAAGAGGGAGGAGCAA	GAAAAAAAGGGGGGGGGGAGGGGGAGGGGAAGAAGAGAAGAAGAAGGAGCAG	hap_c222	hap_c01	GG	2	NA	CC	NA	-/-
discovery	control	dog_2076	GAAAAAAAGGGGGGGGGGAGGGGGAGGGGAAGAAGAGAAGAAGAAGGAGCAG	GAAAAAAAGGGGGGGGGGAGGGGGAGGGGAAGAAGAGAAGAAGAAGGAGCAG	hap_c01	hap_c01	GG	2	NA	CC	NA	-/-
discovery	control	dog_2077	GAAGAGAGGAGGAGAAGGAGAGGGAGGAGCAGGAGAGAAGAAGAGAAAACAA	GAAGAGAGGAGGAGAAGGAGAGGGAGGAGCAGGAGAGAAGAAGAGAAAACAA	hap_c06	hap_c06	GG	2	NA	CC	NA	-/-
discovery	control	dog_2081	GTGAAGAAGGGGGGAAGGAGAAGGAGGGGAAGGGGAGAAGAGGAAGGAAAAG	GAGAAAGAGAGAGGGGGGGGAGGAAGGAGAAGGGGAGAAGGGGGAGAAGCAG	hap_c32	hap_c31	GG	2	NA	CC	NA	-/-
discovery	control	dog_2082	GAAGAGAGGAGAGGGGGGGGAGAGCGGGGAAGGGGAGAACGGGGAGGCGAAA	GAAGAGAGGAGAGGGGGGGGAGAGCGGGGAAGGGGAGAACGGGGAGGCGAAA	hap_c58	hap_c58	GG	2	0	CC	NA	SINE/SINE
discovery	control	dog_2083	GAAGAGAGGAGGAGAAGGAGAGGGAGGAGCAGGAGAGAAGAAGAGAAAACAA	GAAAAAAAGGGGGGGGGGAGGGGGAGGGGAAGAAGAGAAGAAGAAGGAGCAG	hap_c06	hap_c01	GG	2	NA	CC	NA	-/-
discovery	control	dog_2084	GAGAAGAAGGGGAGGGGGGGAGGGCGAAGAAGGAGGGAAGAGGGAGGAGCGG	GAGAAAGAGAGAGAGAGGAGAGGGCAAGAAAGGGGAGAAGAGAGAGGAAAAG	hap_c113	hap_c22	GG	2	NA	CC	NA	-/-
discovery	control	dog_2085	GAAAAAAAGGGGGGGGGGAGGGGGAGGGGAAGAAGAGAAGAAGAAGGAGCAG	GAAGAGAGGAGGAGAAGGAGAGGGAGGAGCAGGAGAGAAGAAGAGAAAACAA	hap_c01	hap_c06	GG	2	NA	CC	NA	-/-
discovery	control	dog_2086	GAAAAAGAGAGGGGGAGGGGAGGGAGGAGAAGAGGAGGACGGAGAGGAAAAG	GAGAAAGAGAGGGGGGGGGGAGAGAGGAAAAGGAGGGAAGAGGGAGGAGCAG	hap_c182	hap_c04	GG	2	NA	CC	NA	-/-
discovery	control	dog_2087	GAGAAAGAGAGGGGGGGGGGAGAGAGGAAAAGGAGGGAAGAGGGAGGAGCAG	GAAAAAAAGGAGGGGGGGGGAGGGCGAAGAAGGAGGGGAGGGGGAGAAGCGG	hap_c04	hap_c07	GG	2	NA	CC	NA	-/-
discovery	control	dog_2088	ATGAAAGAGAGAGGGGGGGGGGGGAGGAAAGGGAGAGAAGAGGGAGGAGCGG	GAGAAAGAGAGGGGGGGGGGAGAGAGGAAAAGGAGGGAAGAGGGAGGAGCAG	hap_c03	hap_c04	GG	2	NA	CC	NA	SINE/-
discovery	control	dog_2089	ATGAAAGAGAGAGGGGGGGGGGGGAGGAAAGGGAGAGAAGAGGGAGGAGCGG	ATGAAAGAGAGAGGGGGGGGGGGGAGGAAAGGGAGAGAAGAGGGAGGAGCGG	hap_c03	hap_c03	GG	2	NA	CC	NA	-/-
discovery	control	dog_2090	GAGAAAGAGAGGGGGGGGGGAGAGAGGAAAAGGAGGGAAGAGGGAGGAGCAG	GAGAAAGAGAGAGGGGGGGGAGAGCGAAAAAGGGAAGAAGGGAGAGGAACAA	hap_c04	hap_c14	GG	2	NA	CC	NA	-/-
discovery	control	dog_2091	GAAAAAAAGGAGGGGGGGGGAGGGCGAAGAAGGAGGGGAGGGGGAGAAGCGG	GAAAAAGAGAGAGGGGGGAAAGAGAGGAGAAGGGGAGAACGGGGAGAAGCGG	hap_c07	hap_c17	GG	2	NA	CC	NA	-/-
discovery	control	dog_2093	GAAAAAAAGGAGGGGGGGGGAGGGCGAAGAAGGAGGGGAGGGGGAGAAGCGG	GAAAAAAAGGGGGGGGGGAGGGGGAGGGGAAGAAGAGAAGAAGAAGGAGCAG	hap_c07	hap_c01	GG	2	NA	CC	NA	-/-
discovery	control	dog_2095	GAGAAAAAGGAGGGGGGGGGAGAGAGGAAAAGGAGAGAAGAGGGAAGAGCAG	GAGGGGGAGGGGAGAAGGAAGGGGAGGAGAAGGAGGGAAGAGGGAGGAGCAG	hap_c41	hap_c106	GG	2	NA	CC	NA	-/-
discovery	control	dog_2100	GAGAAAGAGGGAGGAAGGGAGGAGAGGGGAAAGGGGAAACGGGGAGGAACAG	GAGAAGGAGAGAAGAAGGAGGGAGAGGGGAAGGGAGGGGCGAGAAGGAGCAG	hap_c18	hap_c110	GG	2	NA	CC	NA	SINE/SINE
discovery	control	dog_2102	GAAAAAAAGGGGGGGGGGAGGGGGAGGGGAAGAAGAGAAGAAGAAGGAGCAG	GAAAAAGAGAGGGGAAGGAGGGAAAGGAGAAGGGGAGAAGGGGAAGGAGCAG	hap_c01	hap_c02	GG	2	NA	CC	NA	-/-
discovery	control	dog_2103	GAGAAAGAGAGGGGGAGAGGAGGGAGGGGAAGGGGAGAAGAGGGAGGAGAAG	GAGAAAGAGGGAGGGAGGGAGGAGAGGGGAAAGGGGAAACGGGGAGGAACAG	hap_c08	hap_c11	GG	2	NA	CC	NA	SINE/-
discovery	control	dog_2104	ATGAAAGAGAGAGGGGGGGGGGGGAGGAAAGGGAGAGAAGGGGGAGAAGCGG	GAAAAAGAGAGGGGAAGGAGGGAAAGGAGAAGGGGAGAAGGGGAAGGAGCAG	hap_c38	hap_c02	GG	2	NA	CC	NA	-/-
discovery	control	dog_2105	GAGAAAGAGAGAGGGGGGGGAGAGCGAAAAAGGGAAGAAGGGAGAGGAACAA	GAAAAAAAGGAGGGGGGGGGAGGGCGAAGAAGGAGGGGAGGGGGAGAAGCGG	hap_c14	hap_c07	GG	2	NA	CC	NA	-/-
discovery	control	dog_2106	GAAAAAAAGGAGGGGGGGGGAGGGCGAAGAAGGAGGGGAGGGGGAGAAGCGG	GAAAAAGAGAGGGGGAGAAGGGGGAGGGGAAGAGGAGAAGAGGGAGGAGCGG	hap_c07	hap_c20	GG	2	NA	CC	NA	-/-
discovery	control	dog_2107	ATGAAAGAGAGAGGGGGGGGGGGGAGGAAAGGGAGAGAAGAGGGAGGAGCGG	GAAAAAGAGAGGGGGAGGGGAGGGAGGAGAAGAGGAGGACGGGGAGGAGCAG	hap_c03	hap_c05	GG	2	NA	CC	NA	-/-
discovery	control	dog_2108	GAAGAGAGGAGGAGAAGGAGAGGGAGGAGCAGGAGAGAAGAAGAGAAAACAA	GAAGAGAGGAGGAGAAGGGGGGGGAGGAAAGGGAGAGAAGAGGGAGGAGCGG	hap_c06	hap_c44	GG	2	NA	CC	NA	-/-
discovery	control	dog_2109	GAAAAAGAGAGGGGAAGGAGGGAAAGGAGAAGGGGAGAAGGGGAAGGAGCAG	ATGAAAGAGAGAGGGGGGGGGGGGAGGAAAGGGAGAGAAGAGGGAGGAGCGG	hap_c02	hap_c03	GG	2	NA	CC	NA	-/-
discovery	control	dog_2110	GAAAAAAAGGAGGGGGGGGGAGGGCGAAGAAGGAGGGGAGGGGGAGAAGCGG	GAAAAAAAGGAGGGGGGGGGAGGGCGAAGAAGGAGGGGAGGGGGAGAAGCGG	hap_c07	hap_c07	GG	2	NA	CC	NA	-/-
discovery	control	dog_2111	ATGAAAGAGAGAGGGGGGGGGGGGAGGAAAGGGAGAGAAGAGGGAGGAGCGG	GAAGGGGAGAGAAGAAGGAGGGAGAGGGGCAGGAGGGAAGAGGGAGGAGCAG	hap_c03	hap_c15	GG	2	NA	CC	NA	SINE/-
discovery	control	dog_2112	ATGAAAGAGAGAGGGGGGGGGGGGAGGAAAGGGAGAGAAGAGGGAGGAGCGG	ATGAAAGAGAGAGGGGGGGGGGGGAGGAAAGGGAGAGAAGAGGGAGGAGCGG	hap_c03	hap_c03	GG	2	NA	CC	NA	-/-
discovery	control	dog_2113	ATGAAAGAGAGAGGGGGGGGGGGGAGGAAAGGGAGAGAAGAGGGAGGAGCGG	GAAAAAAAGGAGGGGGGGGGAGGGCGAAGAAGGAGGGGAGGGGGAGAAGCGG	hap_c03	hap_c07	GG	2	NA	CC	NA	-/-
discovery	control	dog_2114	GAAGAGAGGAGGAGAAGGAGAGGGAGGAGCAGGAGAGAAGAAGAGAAAACAA	GAGAAAGAGAGAGGGGGGGGAGAGCGAAAAAGGGAAGAAGGGAGAGGAACAA	hap_c06	hap_c14	GG	2	NA	CC	NA	-/-
discovery	control	dog_2115	GAGAAAGAGAGAGGGGGAAAAGAGAGGAAAAGGAGAGGGCGGGGAGGAGCAG	GAAAAAAAGGGGGGGGGGAGGGGGAGGGGAAGAAGAGAAGAAGAAGGAGCAG	hap_c40	hap_c01	GG	2	NA	CC	NA	-/-
discovery	control	dog_2116	GAAGAGAGGAGGAGAAGGAGAGGGAGGAGCAGGAGAGAAGAAGAGAAAACAA	GAAAAAGAGAGGGGAAGGAGGGAAAGGAGAAGGGGAGAAGGGGAAGGAGCAG	hap_c06	hap_c02	GG	2	NA	CC	NA	-/-
discovery	control	dog_2117	GAAAAAGAGAGGGGAAGGAGGGAAAGGAGAAGGGGAGAAGGGGAAGGAGCAG	GAAAAAGAGAGGGGAAGGAGGGAAAGGAGAAGGGGAGAAGGGGAAGGAGCAG	hap_c02	hap_c02	GG	2	NA	CC	NA	-/-
discovery	control	dog_2118	GAGAAAGAGAGAGGGGGGGGAGGAAGGAGAAGGGGAGAAGGGGGAGAAGCAG	ATGAAAGAGAAAGAGAGGAGAGGGAGGAAAAGGGGAGAAGAGGGAGGAGCAG	hap_c31	hap_c27	GG	2	NA	CC	NA	-/-
discovery	control	dog_2119	GAAGAGAGGAGGAGAAGGAGAGGGAGGAGCAGGAGAGAAGAAGAGAAAACAA	GAGAAAGAGAGGGGGGGGGGAGAGAGGAAAAGGAGGGAAGAGGGAGAAGCGG	hap_c06	hap_c121	GG	2	NA	CC	NA	-/-
discovery	control	dog_2120	GAAAAAAAGGAGGGGGGGGGAGGGCGAAGAAGGAGGGGAGGGGGAGAAGCGG	ATGAAAGAGAGAGGGGGGGGGGGGAGGAAAGGGAGAGAAGGGGGAGAAGCGG	hap_c07	hap_c38	GG	2	NA	CC	NA	-/-
discovery	control	dog_2121	GAAGGGGAGAGAAGAAGGAGGGAGAGGGGCAGGAGGGAAGAGGGAGGAGCAG	ATGAAAGAGAGAGGGGGGGGGGGGAGGAAAGGGAGAGAAGAGGGAGGAGCGG	hap_c15	hap_c03	GG	2	NA	CC	NA	-/-
discovery	control	dog_2122	ATGAAAGAGAGAGGGGGGGGGGGGAGGAAAGGGAGAGAAGAGGGAGGAGCGG	ATGAAAGAGAGAGGGGGGGGGGGGAGGAAAGGGAGAGAAGAGGGAGGAGCGG	hap_c03	hap_c03	GG	2	NA	CC	NA	-/-
discovery	control	dog_2123	GAAGAGAGGAGGAGAAGGAGAGGGAGGAGCAGGAGAGAAGAAGAGAAAACAA	GAAGAGAGGAGGAGAAGGAGAGGGAGGAGCAGGAGAGAAGAAGAGAAAACAA	hap_c06	hap_c06	GG	2	NA	CC	NA	-/-
discovery	control	dog_2124	GAAAAAAAGGAGGGGGGGGGAGGGCGAAGAAGGAGGGGAGGGGGAGAAGCGG	GAGAAAGAGAGAGGGGGGGGAGAGCGAAAAAGGGAAGAAGGGAGAGGAACAA	hap_c07	hap_c14	GG	2	NA	CC	NA	-/-
discovery	control	dog_2125	ATAAAAGAGAGGGGGAGGAGGGAGAGGGGAAGGGGAGAAGGGGGAGGAGAAG	ATGAAAGAGGGGGGGAGGAGAGGGAGGAAAAGAAGAGAACGGGGAGGAGCGG	hap_c63	hap_c28	GG	2	NA	CC	NA	SINE/SINE
discovery	control	dog_2127	GAGAAAGAGAGGGGGAGAGGAGGGAGGGGAAGGGGAGAAGAGGGAGGAGAAG	ATGAAAGAGAGAGGGGGGGGGGGGAGGAAAGGGAGAGAAGAGGGAGGAGCGG	hap_c08	hap_c03	GG	2	NA	CC	NA	-/-
discovery	control	dog_2133	GAAAAAAAGGAGGGGGGGGGAGGGCGAAGAAGGAGGGGAGGGGGAGGAGAAG	GAAAAAAAGGGGGGGGGGAGGGGGAGGGGAAGAAGAGAAGAAGAAGGAGCAG	hap_c10	hap_c01	GG	2	NA	CC	NA	-/-
discovery	control	dog_2134	GAGAAAGAGGGAGGGAGGGAGGAGAGGGGAAAGGGGAAACGGGGAGGAACAG	GAGAAAGAGAGGGGGAGAGGAGGGAGGGGAAGGGGAGAAGAGGGAGGAGAAG	hap_c11	hap_c08	GG	2	NA	CC	NA	-/-
discovery	control	dog_2136	GAGAAAGAGGGAGGGAGGGAGGAGAGGGGAAAGGGGAAACGGGGAGGAACAG	GAGAAAGAGAGGGGGAGAGGAGGGAGGGGAAGGGGAGAAGAGGGAGGAGAAG	hap_c11	hap_c08	GG	2	NA	CC	NA	-/-
discovery	control	dog_2137	GAGAAAGAGGGAGGGAGGGAGGAGAGGGGAAAGGGGAAACGGGGAGGAACAG	GAGAAAGAGAGGGGGAGAGGAGGGAGGGGAAGGGGAGAAGAGGGAGGAGAAG	hap_c11	hap_c08	GG	2	NA	CC	NA	-/-
discovery	control	dog_2139	GAAGAGAGAAGGGAGAGGAGAGGGCGAAGCAGAAGAAAAGGGGGAGGAGCGG	GAAAAAGAGAGAGGGGGGGGAGAGAGGGGAGGGGGGGGAGAGGGAGGAACAG	hap_c47	hap_c34	GG	2	NA	CC	NA	SINE/SINE
discovery	control	dog_2144	AAAGAGAGAAGGGGGAGAAGGGGGAGGAGAAGGGGAGGGCGAGAAGGAGCAG	GAAGGGGAGAGAAGAAGGAGGGAGAGGGGAAGGAGAGAAGAGGGAGAAGCGG	hap_c242	hap_c155	GG	2	NA	CC	NA	SINE/SINE
discovery	control	dog_2145	GAGAAAGAGGGAGGGAGGGAGGAGAGGGGAAAGGGGAAACGGGGAGGAACAG	ATAAAAGAGAGGGGGAGAAAGGGGAGGAGAAGGAGGGAAGGGGAAGGAACGG	hap_c11	hap_c09	GG	2	NA	CC	NA	-/-
discovery	control	dog_2150	ATGAAAGAGAGAGGGGGGGGGGGGAGGAAAGGGAGAGAAGAGGGAGGAGCGG	GAAAAAAAGGGGGGGGGGAGGGGGAGGGGAAGAAGAGAAGAAGAAGGAGCAG	hap_c03	hap_c01	GG	2	NA	CC	NA	-/-
discovery	control	dog_2151	ATGAAAGAGAAAGAGAGGAGAGGGAGGAAAAGGGGAGAAGAGGGAGGAGCAG	GAAAAAGAGAGGGGGAGGGGAGGGAGGAGAAGAGGAGGACGGGGAGGAGCAG	hap_c27	hap_c05	GG	2	NA	CC	NA	-/-
discovery	control	dog_2154	GAAAAAGAGAGAGGGGGGAAAGAGAGGAGAAGGGGAGAACGGGGAGAAGCGG	GAAAAAAAGGGGGGGGGGAGGGGGAGGGGAAGAAGAGAAGAAGAAGGAGCAG	hap_c17	hap_c01	GG	2	NA	CC	NA	-/-
discovery	control	dog_2155	GAAAAAGAGAGAGGGGGGGGAGAGAGGGGAGGGGGAGAAGGAGAAGGAGCAG	ATGAAAGAGGGGGGGAGGAGAGGGAGGAAAAGAAGAGAACGGGGAGGAGCGG	hap_c193	hap_c28	GG	2	NA	CC	NA	SINE/SINE
discovery	control	dog_2158	GAGAAAGAGGGGGGGAGGGGAGGGAGGGGAAGGGGAGAAGAGGGGAAAGCAA	GAAAAAGAGAGAGGGGGGGGAGAGAGGGGAGGGGGGGGAGAGGGAGGAACAG	hap_c69	hap_c34	GG	2	NA	CC	NA	SINE/SINE
discovery	control	dog_2160	GAAAAAAAGGAGGGGGGGGGAGGGCGAAGAAGGAGGGGAGGGGGAGAAGCGG	GAAAAAGAGAGGGGAAGGAGGGAAAGGAGAAGGGGAGAAGGGGAAGGAGCAG	hap_c07	hap_c02	GG	2	NA	CC	NA	-/-
discovery	control	dog_2164	GAAAAAGAGAGGGGGAGGGGAGGGAGGAGAAGAGGAGGACGGGGAGGAGCAG	GAAAAAAAGGGGGGGGGGAGGGGGAGGGGAAGAAGAGAAGAAGAAGGAGCAG	hap_c05	hap_c01	GG	2	NA	CC	NA	SINE/-
discovery	control	dog_2165	GAAAAAAAGGAGGGGGGGGGAGGGCGAAGAAGGAGGGGAGGGGGAGAAGCGG	GAAGAGAGGAGGAGAAGGAGAGGGAGGAGCAGGAGAGAAGAAGAGAAAACAA	hap_c07	hap_c06	GG	2	NA	CC	NA	-/-
discovery	control	dog_2167	ATGAAAGAGAGAGGGGGGGGAGGAAGGAGAAGGGGAGAAGGGGGAGAAGCAG	GAAAAAGAGAGGGGGAGGGGAGGGAGGGGAAGGGGAGGGCGAGAAGGAGCGG	hap_c223	hap_c86	GG	2	NA	CC	NA	SINE/-
discovery	control	dog_2168	GTAAAAAAGGAAGGGAGGAAAGGGAGGAAAAGAAGGGAAGGGGGAAGAGCGA	GAAAAAAAGGAGGGGGGGAGGGGGAGGAGCAGGGGAGAAGAGGGAGGAACAG	hap_c66	hap_c211	GG	2	NA	CC	NA	-/-
discovery	control	dog_2170	GAAAAAGAGAGGGGGAGGGGAGGGAGGAGAAGAGGAGGACGGGGAGGAGCAG	GAAAAAAAGGGGGGGGGGAGGGGGAGGGGAAGAAGAGAAGAAGAAGGAGCAG	hap_c05	hap_c01	GG	2	NA	CC	NA	-/-
discovery	control	dog_2175	GAAGGGGAGAGAAGAAGGAGGGAGAGGGGCAGGAGGGAAGAGGGAGGAGCAG	GAAAAAGAGAGGGGGAGAAGGGGGAGGGGAAGAGGAGAAGAGGGAGGAGCGG	hap_c15	hap_c20	GG	2	NA	CC	NA	-/-
discovery	control	dog_2177	ATGAAAGAGAGAGGGGGGGGGGGGAGGAAAGGGAGAGAAGAGGGAGGAGCGG	GAAGAGAAGAGAGGAAGGGGAGAGAGGGGAGGGGGAGAACGGGGAGGAGCAG	hap_c03	hap_c85	GG	2	NA	CC	NA	-/-
discovery	control	dog_2178	GAAAAAGAGAGGGGGAGAAGGGGGAGGGGAGGGGGGGGAGAGGGAGGAACAG	GAAAAAGAGAGGGGGAGAAGGGGGAGGGGAGGGGGGGGAGAGGGAGGAACAG	hap_c49	hap_c49	GG	2	NA	CC	NA	-/-
discovery	control	dog_2179	GAGAAAGAGAGAGGGGGGGAGGAGAGGAAAAGGAGGGAAGGAGGAGGCACAA	GAAAAAAAGGAGGGGGGGGGAGGGCGAAAAAAGGGAGAAGAGGGAGGCGCAG	hap_c56	hap_c203	GG	2	NA	CC	NA	SINE/-
discovery	control	dog_2180	ATAAAAGAGAGGGGGAGAAAGGGGAGGAGAAGGAGGGAAGGGGAAGGAACGG	GAGAAAGAGAGGGGGAGAGGAGGGAGGGGAAGGGGAGAAGAGGGAGGAGAAG	hap_c09	hap_c08	GG	2	NA	CC	NA	-/-
discovery	control	dog_2182	GAGAAAGAGGGGGGGGGGGGAGAGCAAGGCAGAAGAGGGCGAGGAGGAACAA	GAAGGGGAGGGGAGAAGGGGAGAGAGGGGAGGGGGAGAAGGGGGAGGAGCAG	hap_c114	hap_c26	GG	2	NA	CC	NA	-/-
discovery	control	dog_2184	GAAAAAAAGGGGGGGGGGAGGGGGAGGGGAAGAAGAGAAGAAGAAGGAGCAG	ATGAAAGAGAGAGGGGGGGGGGGGAGGAAAGGGAGAGAAGAGGGAGGAGCGG	hap_c01	hap_c03	GG	2	NA	CC	NA	-/-
discovery	control	dog_2188	GAAAAAAAGAGGGGGGGGAGGGGGAGGGGAAGAAGAGAAGAAGAAGGAGCAG	ATAGGGGAGGGGAGAAGAAAGGAAAGGAGAAGGAGAAAACGGGGAGGAAAAG	hap_c12	hap_c62	GG	2	NA	CC	NA	-/-
discovery	control	dog_2190	GAGAAAGAGGGAGGAAGGGAGGAGAGGGGAAAGGGGAAACGGGGAGGAACAG	ATAAAAAAGGAGAGAAGGAGGGAGCGAAAAAGGAGAGGGCGAGAAGGAACGG	hap_c18	hap_c237	GG	2	NA	CC	NA	-/-
discovery	control	dog_2191	GAAAAAGAGAGGGGAAGGAGGGAAAGGAGAAGGGGAGAAGGGGAAGGAGCAG	GAAAAAAAGGGGGGGGGGAGGGGGAGGGGAAGAAGAGAAGAAGAAGGAGCAG	hap_c02	hap_c01	GG	2	NA	CC	NA	-/-
discovery	control	dog_2194	GAAAAAAAGGAGGGGGGGGGAGGGCGAAGAAGGAGGGGAGGGGGAGGAGAAG	GAAAAAGAGAGGGGGAGGGGAGGGAGGAGAAGAGGAGGACGGGGAGGAGCAG	hap_c10	hap_c05	GG	2	NA	CC	NA	-/-
discovery	control	dog_2195	GAAAAAGAGAGGGGAAGGAGGGAAAGGAGAAGGGGAGAAGGGGAAGGAGCAG	GAAAAAGAGAGGGGGAGGGGAGGGAGGAGAAGAGGAGGACGGGGAGGAGCAG	hap_c02	hap_c05	GG	2	NA	CC	NA	-/-
discovery	control	dog_2197	GAAAAAAAGGGGGGGGGGAGGGGGAGGGGAAGAAGAGAAGAAGAAGGAGCAG	ATGAAAGAGAGAGGGGGGGGGGAGAGGAAAAGGAGGGAAGAGGGAGGAGCAG	hap_c01	hap_c50	GG	2	NA	CC	NA	-/-
discovery	control	dog_2198	GAGAAAGAGAGAGGGGGGGGAGGGAGGGGAAGGGGAGAAGAGGGAGGCGCAG	AAAGGGGAGAGAAGAAGGAGGGAGAGGGGAAGAAGAGAAGGAGGAGGAGCGG	hap_c131	hap_c101	GG	2	NA	CC	NA	SINE/SINE
discovery	control	dog_2204	ATAAAAAAGGAGGGGGGGGGAGAACGAAGCAAGGGAGAAGAGGGAGGAACAG	GAAAAAGAGAGGGGAAGGAGGGAAAGGAGAAGGGGAGAAGGGGAAGGAGCAG	hap_c235	hap_c02	GG	2	NA	CC	NA	-/-
discovery	control	dog_2206	GAAAAAAAGGGGGGGGGGAGGGGGAGGGGAAGAAGAGAAGAAGAAGGAGCAG	GAAAAAAAGGGGGGGAGGGGAGGGAGGAGAAGAGGAGGACGGGGAGGAGCAG	hap_c01	hap_c201	GG	2	NA	CC	NA	-/-
discovery	control	dog_2207	AAAGGGAGGAAGGGGAGAAGGGGGCAAGAAAGGGGAGAAGAGAGAGGAAAAG	GAAAAAGAGAGGGGAAGGAGGGAAAGGAGAAGGGGAGAAGGGGAAGGAGCAG	hap_c29	hap_c02	GG	2	NA	CC	NA	-/-
discovery	control	dog_2209	ATGAAAGAGAGAGGGGGGGGGGGGAGGAAAGGGAGAGAAGAGGGAGGAGCGG	GAAAAAGAGAGGGGGAGGGGAGGGAGGAGAAGAGGAGGACGGGGAGGAGCAG	hap_c03	hap_c05	GG	2	NA	CC	NA	-/-
discovery	control	dog_2212	GAAAAAAAGGGGGGGGGGAGGGGGAGGGGAAGAAGAGAAGAAGAAGGAGCAG	GAAAAAGAGAGGGGAAGGAGGGAAAGGAGAAGGGGAGAAGGGGAAGGAGCAG	hap_c01	hap_c02	GG	2	NA	CC	NA	SINE/-
discovery	control	dog_2214	ATGAAAGAGAGAGGGGGGGGGGGGAGGAAAGGGAGAGAAGAGGGAGGAGCGG	GAAAAAAAGGAGGGGGGGGGAGGGCGAAGAAGGAGGGGAGGGGGAGGAGAAG	hap_c03	hap_c10	GG	2	NA	CC	NA	-/-
discovery	control	dog_2217	GAGAAAGAGGGAGGAAGGGAGGAGAGGGGAAAGGGGAAACGGGGAGGAACAG	GAGAAAGAGAGAGGAAGAAGGGGGAGGAGAAGAAGAGAAGAGGGAGGAGCAG	hap_c18	hap_c144	GG	2	NA	CC	NA	-/-
discovery	control	dog_2218	GAAAAAGAGAGGGGAAGGAGGGAAAGGAGAAGGGGAGAAGGGGAAGGAGCAG	GAGAAAGAGAGGGGGGGGGGAGAGAGGAAAAGGAGGGAAGAGGGAGGAGCAG	hap_c02	hap_c04	GG	2	NA	CC	NA	SINE/-
discovery	control	dog_2225	GAAAAAGAGAGGGGAAGGAGGGAAAGGAGAAGGGGAGAAGGGGAAGGAGCAG	GAAAAAGAGAGGGGGAGAAGGGGGAGGGGAAGAGGAGAAGAGGGAGGAGCGG	hap_c02	hap_c20	GG	2	NA	CC	NA	SINE/-
discovery	control	dog_2227	GAAAAAGAGAGGGGAAGGAGGGAAAGGAGAAGGGGAGAAGGGGAAGGAGCAG	GAAAAAGAGAGGGGAAGGAGGGAAAGGAGAAGGGGAGAAGGGGAAGGAGCAG	hap_c02	hap_c02	GG	2	NA	CC	NA	-/-
discovery	control	dog_2240	GAAGGGGAGAGAAGAAGGAGGGAGAGGGGAAGGGGGAAACGGGGAGGAACAG	GAAAAAAAGGAGGGGGGGAGGGGGCGAAGAAGAAGAGAAGAGGGAGGAGCGG	hap_c42	hap_c210	GG	2	NA	CC	NA	-/-
discovery	control	dog_2241	GAGAAAGAGAGGGGGAGAGGAGGGAGGGGAAGGGGAGAAGAGGGAGGAACAG	GAGAAAGAGGGAGGGAGGGAGGAGAGGGGAAAGGGGAAACGGGGAGGAACAG	hap_c125	hap_c11	GG	2	NA	CC	NA	-/-
discovery	control	dog_2242	GAGAAAGAGGGAGGGAGGGAGGAGAGGGGAAAGGGGAAACGGGGAGGAACAG	GTGAAAGAGAGAGGGAGAAGAGAGCGGAAAAGAAGGGGAGGGGAAGGAAAAG	hap_c11	hap_c13	GG	2	NA	CC	NA	-/-
discovery	control	dog_2243	GAAAAAGAGAGGGGAAGGAGGGAAAGGAGAAGGGGAGAAGGGGAAGGAGCAG	GAAGGGGAGAGAAGAAGGAGGGAGAGGGGCAGGAGGGAAGAGGGAGGAGCAG	hap_c02	hap_c15	GG	2	NA	CC	NA	SINE/-
discovery	control	dog_2247	ATGAAAGAGAAAGAGAGGAGAGGGAGGAGAAGAGGAGGACGGGGAGGAGCAG	GAAAAAAAGGGGGGGGGGAGGGGGAGGGGAAGAAGAGAAGAAGAAGGAGCAG	hap_c51	hap_c01	GG	2	NA	CC	NA	SINE/-
discovery	control	dog_2248	GAAAAAAAGGGGGGGGGGAGGGGGAGGGGAAGGAGGGGAGGGGGAGAAGCGG	GAAGAGAGGAGGAGAAGGAGAGGGAGGAGCAGGAGAGAAGAAGAGAAAACAA	hap_c199	hap_c06	GG	2	NA	CC	NA	-/-
discovery	control	dog_2249	GAAAAAGAGAGGGGGAGGGGAGGGAGGAGAAGAGGAGGACGGGGAGGAGCAG	GAGAAAGAGAGGGGGGGGGGAGAGAGGAAAAGGAGGGAAGAGGGAGGAGCAG	hap_c05	hap_c04	GG	2	NA	CC	NA	-/-
discovery	control	dog_2250	GAAGAGAGGAGGAGAAGGAGAGGGAGGAGCAGGAGAGAAGAAGAGAAAACAA	AAAGGGAGGAAGGGGAGAAGGGGGCAAGAAAGGGGAGAAGAGAGAGGAAAAG	hap_c06	hap_c29	GG	2	NA	CC	NA	-/-
discovery	control	dog_2251	GAAAAAAAGGGGGGGGGGAGGGGGAGGGGAAGAAGAGAAGAAGAAGGAGCAG	ATGAAAGAGAAAGAGAGGAGAGGGAGGAAAAGGGGAGAAGAGGGAGGAGCAG	hap_c01	hap_c27	GG	2	NA	CC	NA	-/-
discovery	control	dog_2252	GAAAAAGAGAGGGGAAGGAGGGAAAGGAGAAGGGGAGAAGGGGAAGGAGCAG	GAAAAAAAGGAGGGGGGGGGAGGGCGAAGAAGGAGGGGAGGGGGAGGAGAAG	hap_c02	hap_c10	GG	2	NA	CC	NA	-/-
discovery	control	dog_2259	GAAGGGGAGGGGAGAAGGGGAGAGCAAGAAAGGGAAGAACGGGGAGGCGCGG	ATGAAAGAGAAAGAGAGGAGAGGGAGGGGAGGGGGAGAAGGGGGAGGAACAG	hap_c78	hap_c225	GG	2	NA	CC	NA	-/-
discovery	control	dog_2260	GAAAAAGAGAGAGGGGGAAAAAGGAGGGGAAAGGAAGAAGAGGGAGGAGCGG	GAAGAGAAGAGAGGGGGAAGAGAGAGGGGAAGGGGGGAAGGGGGAGGAGCGG	hap_c21	hap_c84	GG	2	NA	CC	NA	SINE/SINE
discovery	control	dog_2262	GAAAAAGAGAGGGGGAGGAGGGGGAGGGGAGGGGGAGAAGGGGGAGGAGCAG	GAAAAAAAGGAGGGGGGGAGAGGGCGAAGAAGAAGAGAAGAGGGAGGAGCGG	hap_c87	hap_c36	GG	2	NA	CC	NA	-/-
discovery	control	dog_2263	ATGAAAGAGAGAGGGGGGGGGGGGAGGAAAGGGAGAGAAGAGGGAGGAGCGG	GAGAAAGAGAGAGGGGGAAAAGAGAGGAAAAGGAGAGGGCGGGGAGGAGCAG	hap_c03	hap_c40	GG	2	NA	CC	NA	-/-
discovery	control	dog_2264	GAGAAAGAGAGGGGGGGGGGAGAGAGGAAAAGGAGGGAAGAGGGAGGAGCAG	GAAAAAAAGGGGGGGGGGAGGGGGAGGGGAAGAAGAGAAGAAGAAGGAGCAG	hap_c04	hap_c01	GG	2	NA	CC	NA	-/-
discovery	control	dog_2266	GAAAAAGAGAGAGGGGGGAAAGAGAGGAGAAGGGGAGAAGAGGGAGGAACAG	GAAGAGAAGAGAGGAAGGGGAGAGAGGGGAGGGGGAGAAGAGAGAGGAAAAG	hap_c59	hap_c24	GG	2	0	CC	CC	SINE/SINE
discovery	control	dog_2267	GAGAAAAAGGAGGGGGGGAAGGAGAGGAGAAGGGGAGAAGGGGGAGGAGAAA	GAGAAAAAGGAGGGGGGGAAGGAGAGGAGAAGGGGAGAAGGGGGAGGAGAAA	hap_c19	hap_c19	GG	2	NA	CC	NA	SINE/SINE
discovery	control	dog_2269	GTAGGGAAGGGGAGAAGGAGGGGGAGGGGAAAGAGAGAAGAGGGGAAAGCAG	GAGAAAGAGAGGGGGAGAAGGGGGAGGGGAGGGGGGGGAGAGGGAGGAACAG	hap_c65	hap_c128	GG	2	NA	CC	NA	-/-
discovery	control	dog_2271	GAGAAAGAGAGGGGGAGAGGAGGGAGGGGAAGGGGAGAAGAGGGAGGAGAAG	ATAAAAGAGAGGGGGAGAAAGGGGAGGAGAAGGAGGGAAGGGGAAGGAACGG	hap_c08	hap_c09	GG	2	NA	CC	NA	SINE/-
discovery	control	dog_2274	GAAAAAAAGGAGGGGGGGGGAGGGCGAAGAAGGAGGGGAGGGGGAGGAGAAG	GAAAAAAAGGAGGGGGGGGGAGGGCGAAGAAGGAGGGGAGGGGGAGGAGAAG	hap_c10	hap_c10	GG	2	NA	CC	NA	SINE/SINE
discovery	control	dog_2276	ATAAAAGAGAGGGGGAGAAAGGGGAGGAAAGGGAGAGAAGAGGGAGGAGCGG	GAAAAAAAGAGGGGGGGGAGGGGGAGGGGAAGAAGAGAAGAAGAAGGAGCAG	hap_c99	hap_c12	GG	2	NA	CC	NA	-/-
discovery	control	dog_2277	GTGAAAGAGAGAGGGAGAAGAGAGCGGAAAAGAAGGGGAGGGGAAGGAAAAG	ATGAAAGAGAAAGAGAGGAGAGGGAGGGGAGGGGGAGAAGGGGGAGGAGCAG	hap_c13	hap_c25	GG	2	NA	CC	NA	-/-
discovery	control	dog_2278	GAAGGGGAGAGAAGAAGGAGGGAGAGGGGAAGGGAGGGACGGGGAGGAACAA	GAAGGGGAGAGAAGAAGGAGGGAGAGGGGAAGGAGAGAAGAGGGAGGAGCGG	hap_c23	hap_c79	GG	2	NA	CC	NA	-/-
discovery	control	dog_2279	GAAGAGAGGAGGAGAAGGAGAGGGAGGAGCAGGAGAGAAGAAGAGAAAACAA	GAGAAAGAGAGGGGGGGGGGAGAGAGGAAAAGGAGGGAAGAGGGAGGAGCAG	hap_c06	hap_c04	GG	2	NA	CC	NA	-/-
discovery	control	dog_2281	GAAAAAAAGGGGGGGGGGAGGGGGAGGGGAAGAAGAGAAGAAGAAGGAGCAG	GAAAAAGAGAGGGGGAGGGGAGGGAGGAGAAGAGGAGGACGGGGAGGAGCAG	hap_c01	hap_c05	GG	2	NA	CC	NA	SINE/-
discovery	roan	dog_1002	GAAAAAAAGGAGGGGGGGGGAGGGAGGAAAAGGAGGGAAGGAGGAGGCACAA	ATAAAAAAGGAGGGGAAGGGAGGGAGAAAAAGGGAAGAAGGGAGAGGAACAA	hap_GG02	hap_01	AG	4	NA	TT	NA	SINE/SINE
discovery	roan	dog_1004	ATAAAAAAGGAGGGGAAGGGAGGGAGAAAAAGGGGAGGACGGGGAGGAGAAG	ATAAAAAAGGAGGGGAAGGGAGGGAGAAAAAGGGGAGGACGGGGAGGAGAAG	hap_03	hap_03	AA	4	1	TT	NA	SINE/SINE
discovery	roan	dog_1008	ATAAAAAAGGAGGGGAAGGGAGGGAGAAAAAGGGAAGAAGGGAGAGGAACAA	ATAAAAAAGGAGGGGAAGGGAGGGAGAAAAAGGGAAGAAGGGGGAGGAACAA	hap_01	hap_02	AA	4	1	TT	NA	SINE/SINE
discovery	roan	dog_1009	GAAAAAAAGGAGGGGGGGAGAGGGAGGAGAAGGGGAGAACAGGGGAAAGAAG	ATAAAAAAGGAGGGGAAGGGAGGGAGAAAAAGGGAAGAAGGGAGAGGAACAA	hap_r42	hap_01	AG	3	NA	TC	NA	SINE/SINE
discovery	roan	dog_1010	ATAAAAAAGGAGGGGAAGGGAGGGAGAAAAAGGGAAGAAGGGGGAGGAACAA	ATAAAAAAGGAGGGGAAGGGAGGGAGAAAAAGGGAAGAAGGGGGAGGAACAA	hap_02	hap_02	AA	4	1	TT	NA	SINE/SINE
discovery	roan	dog_1012	GAAAAAAAGGAGGGGGGGGGAGGGAGGAAAAGGAGGGAAGGAGGAGGCACAA	GAAAAAAAGGAGGGGGGGGGAGGGAGGAAAAGGAGGGAAGGAGGAGGCACAA	hap_GG02	hap_GG02	GG	4	NA	TT	NA	SINE/SINE
discovery	roan	dog_1014	GAAAAAAAGGAGGGGGGGGGAAGGAGGGGAAGGGGAAGAGAAGGAGGAGCAG	ATAAAAAAGGAGGGGAAGGGAGGGAGAAAAAGGGGAGGACGGGGAGGAGAAG	hap_r39	hap_03	AG	3	NA	TC	NA	SINE/SINE
discovery	roan	dog_1016	ATAAAAAAGGAGGGGAAGGGAGGGAGAAAAAGGGGAGGACGGGGAGGAGAAG	ATAAAAAAGGAGGGGAAGGGAGGGAGAAAAAGGGAAGAAGGGGGAGGAACAA	hap_03	hap_02	AA	4	NA	TT	NA	SINE/SINE
discovery	roan	dog_1017	GAAAAAGAGAGAGGGGGGAAAGAGAGAAAAAGGGAAGAAGGGAGAGGAACAA	GAAAAAGAGAGAGGGGGGAAAGAGAGAAAAAGGGAAGAAGGGAGAGGAACAA	hap_GG01	hap_GG01	GG	4	NA	TT	NA	SINE/SINE
discovery	roan	dog_1020	ATAAAAAAGGAGGGGAAGGGAGGGAGAAAAAGGGAAGAAGGGAGAGGAACAA	GTGAAAGAGAGAGGGAGAAGAGAGCGGAAAAGAAGGGGAGGGGAAGGAAAAG	hap_01	hap_c13	AG	3	NA	TC	NA	SINE/SINE
discovery	roan	dog_1031	ATAAAAAAGGAGGGGAAGGGAGGGAGAAAAAGGGAAGAAGGAGAAGGAGCGG	ATAAAAAAGGAGGGGAAGGGAGGGAGAAAAAGGGAAGAAGGGAGAGGAACAA	hap_17	hap_01	AA	4	NA	TT	NA	SINE/SINE
discovery	roan	dog_1032	ATAAAAAAGGAGGGGAAGGGAGGGAGAAAAAGGGAAGAAGGGAGAGGAACAA	ATAAAAAAGGAGGGGAAGGGAGGGAGAAAAAGGGAAGAAGGGAGAGGAACAA	hap_01	hap_01	AA	4	1	TT	NA	SINE/SINE
discovery	roan	dog_1033	GAAGGGGAGGGGAGAAGGGGAGAGAGGGGCAGGAGAGAAGGGGGAGGCGAAA	GAAAAAAAGGAGGGGAAGGGAGGGAGAAAAAGGGAAGAAGGGAGAGGAACAA	hap_r09	hap_06	AG	3	NA	TC	NA	SINE/SINE
discovery	roan	dog_1034	ATAAAAAAGGAGGGGAAGGGAGGGAGAAAAAGGGAAGAAGGGAGAGGAACAA	GAAGGGGAGGGGAGAAGGGGAGAGAGGGGCAGGAGAGAAGGGGGAGGCGAAA	hap_01	hap_r09	AG	3	1	TC	NA	SINE/SINE
discovery	roan	dog_1035	ATAAAAAAGGAGGGGAAGGGAGGGAGAAAAAGGGAAGAAGGGAGAGGAACAA	GAAAAAAAGGAGGGGAAGGGAGGGAGAAAAAGGGAAGAAGGGAGAGGAACAA	hap_01	hap_06	AA	4	NA	TT	NA	SINE/SINE
discovery	roan	dog_1036	GAAAAAAAGGAGGGGAAGGGAGGGAGAAAAAGGGAAGAAGGGAGAGGAACAA	ATAAAAAAGGAGGGGAAGGGAGGGAGAAAAAGGGAAGAAGGGAGAGGAACAA	hap_06	hap_01	AA	4	NA	TT	NA	SINE/SINE
discovery	roan	dog_1041	GAAAAAGAGAGAGGGGGGAAAGAGAGAAAAAGGGAAGAAGGGAGAGGAACAA	ATAAAAAAGGAGGGGAAGGGAGGGAGAAAAAGGGGAGGACGGGGAGGAGAAG	hap_GG01	hap_03	AG	4	NA	TT	NA	SINE/SINE
discovery	roan	dog_1042	GAAAAAGAGAGAGGGGGGAAAGAGAGAAAAAGGGAAGAAGGGAGAGGAACAA	GAGAAAGAGAGAGGGGGGGGAGGGCGAAGAAGGAGGGGAGGGGGAGGAGAAG	hap_GG01	hap_c130	GG	3	NA	TC	NA	SINE/SINE
discovery	roan	dog_1043	ATAAAAAAGGAGGGGAAGGGAGGGAGAAAAAGGGAAGAAGGGAGAGGAAAAG	GAAAAAGAGAGAGGGGGGAAAGAGAGAAAAAGGGAAGAAGGGAGAGGAACAA	hap_04	hap_GG01	AG	4	NA	TT	NA	SINE/SINE
discovery	roan	dog_1044	ATGAAGAAGGGGAGAAGGAAAAAACAAGAAAGGGGAGGGCGGGGAGGAGCAG	ATAAAAAAGGAGGGGAAGGGAGGGAGAAAAAGGGGAGGACGGGGAGGAGAAG	hap_c94	hap_03	AG	3	NA	TC	NA	SINE/SINE
discovery	roan	dog_1046	ATAAAAAAGGAGGGGAAGGGAGGGAGAAAAAGGGAAGAAGGGGGAGGAACAA	ATAAAAAAGGAGGGGAAGGGAGGGAGAAAAAGGGGAGGACGGGGAGGAGAAG	hap_02	hap_03	AA	4	1	TT	NA	SINE/SINE
discovery	roan	dog_1054	ATAAAAAAGGAGGGGAAGGGAGGGAGAAAAAGGGAAGAAGGGGGAGGAACAA	ATAAAAAAGGAGGGGAAGGGAGGGAGAAAAAGGGGAGGACGGGGAGGAGAAG	hap_02	hap_03	AA	4	NA	TT	NA	SINE/SINE
discovery	roan	dog_1055	ATAAAAAAGGAGGGGAAGGGAGGGAGAAAAAGGGAAGAAGGGGGAGGAACAA	ATAAAAAAGGAGGGGAAGGGAGGGAGAAAAAGGGAAGAAGGGAGAGGAAAAG	hap_02	hap_04	AA	4	NA	TT	NA	SINE/SINE
discovery	roan	dog_1063	ATAAAAAAGGAGGGGAAGGGAGGGAGAAAAAGGGAAGAAGGGAGAGGAACAA	ATAAAAAAGGAGGGGAAGGGAGGGAGAAAAAGGGAAGAAGGGAGAGGAACAA	hap_01	hap_01	AA	4	NA	TT	NA	SINE/SINE
discovery	roan	dog_1066	ATAAAAAAGGAGGGGAAGGGAGGGAGAAAAAGGGAAGAAGGGAGAGGAAAAG	ATAAAAAAGGAGGGGAAGGGAGGGAGAAAAAGGGGAGGACGGGGAGGAGAAG	hap_04	hap_03	AA	4	NA	TT	NA	SINE/SINE
discovery	roan	dog_1067	GAAAAAAAGGAGGGGGGGGGAGGGAGGAAAAGGAGGGAAGGAGGAGGCACAA	GAAAAAAAGGAGGGGGGGGGAGGGAGGAAAAGGAGGGAAGGAGGAGGCACAA	hap_GG02	hap_GG02	GG	4	NA	TT	TT	SINE/SINE
discovery	roan	dog_1072	ATAAAAAAGGAGGGGAAGGGAGGGAGAAAAAGGGAAGAAGGGAGAGGAACAA	ATAAAAAAGGAGGGGAAGGGAGGGAGAAAAAGGGAAGAAGGGAGAGGAACAA	hap_01	hap_01	AA	4	NA	TT	NA	SINE/SINE
discovery	roan	dog_1080	ATAAAAAAGGAGGGGAAGGGAGGGAGAAAAAGGGAAGAAGGGAGAGGAACAA	GTGAAAGAGAGAGGGGGGAAAGAGAGGAAAAGGAGGGAAGGAGGAGGCACAA	hap_01	hap_r13	AG	3	NA	TC	NA	SINE/SINE
discovery	roan	dog_1081	ATAAAAAAGGAGGGGAAGGGAGGGAGAAAAAGGGAAGAAGGGAGAGGAACAA	ATAAAAAAGGAGGGGAAGGGAGGGAGAAAAAGGGAAGAAGGGAGAGGAACAA	hap_01	hap_01	AA	4	NA	TT	NA	SINE/SINE
discovery	roan	dog_1085	ATAAAAAAGGAGGGGAAGGGAGGGAGGAGAAGGAGGGAAGGGGAAGGAACGG	ATAAAAAAGGAGGGGAAGGGAGGGAGAAAAAGGGGAGGACGGGGAGGAGAAG	hap_12	hap_03	AA	3	NA	0	NA	SINE/SINE
discovery	roan	dog_1088	ATAAAAAAGGAGGGGAAGGGAGAGAGGGGAAGAAGGGAAGGGGGAGGAGCGG	GAAAAAGAGAGAGGGGGGAAAGAGAGAAAAAGGGAAGAAGGGAGAGGAACAA	hap_21	hap_GG01	AG	3	NA	TC	NA	SINE/SINE
discovery	roan	dog_1093	ATAAAAAAGGAGGGGAAGGGAGGGAGAAAAAGGGAAGAAGGGGGAGGAACAA	ATAAAAAAGGAGGGGAAGGGAGGGAGAAAAAGGGGAGGAGGGGGAGGAACAA	hap_02	hap_13	AA	4	NA	TT	NA	SINE/SINE
discovery	roan	dog_1100	ATAAAAAAGGAGGGGAAGGGAGGGAGAAAAAGGGAAGAAGGGGGAGGAACAA	ATAAAAAAGGAGGGGAAGGGAGGGAGAAAAAGGGAAGAAGGGGGAGGAACAA	hap_02	hap_02	AA	4	1	TT	TT	SINE/SINE
discovery	roan	dog_1101	ATAAAAAAGGAGGGGAAGGGAGGGAGAAAAAGGGGAGGACGGGGAGGAGAAG	ATAAAAAAGGAGGGGAAGGGAGGGAGAAAAAGGGAAGAAGGGGGAGGAACAA	hap_03	hap_02	AA	4	NA	TT	NA	SINE/SINE
discovery	roan	dog_1121	ATAAAAAAGGAGGGGAAGGGAGGGAGAAAAAGGGAAGAAGGGAGAGGAAAAG	ATAAAAAAGGAGGGGAAGGGAGGGAGAAAAAGGGAAGAAGGGAGAGGAACAA	hap_04	hap_01	AA	4	1	TT	TT	SINE/SINE
discovery	roan	dog_1122	ATAAAAAAGGAGGGGAAGGGAGGGAGAAAAAGGGAAGAAGGGGGAGGAACAA	ATAAAAAAGGAGGGGAAGGGAGGGAGAAAAAGGGAAGAAGGGAGAGGAACAA	hap_02	hap_01	AA	4	NA	TT	TT	SINE/SINE
discovery	roan	dog_1124	ATAAAAAAGGAGGGGAAGGGAGGGAGAAAAAGGGGAGGACGGGGAGGAGAAG	ATAAAAAAGGAGGGGGGGGGAGAACGAAGCAAGGAGGGGCGGGGAGGAACAG	hap_03	hap_c100	AG	3	NA	TC	NA	SINE/-
discovery	roan	dog_1125	ATAAAAAAGGAGGGGAAGGGAGGGAGAAAAAGGGGAGGACGGGGAGGAGAAG	GAAAAAGAGAGAGGGGGGAAAGAGAGAAAAAGGGAAGAAGGGAGAGGAACAA	hap_03	hap_GG01	AG	4	NA	TT	NA	SINE/SINE
discovery	roan	dog_1131	ATAAAAAAGGAGGGGAAGGGAGGGAGAAAAAGGGGAGGACGGGGAGGAGAAG	ATAAAAAAGGAGGGGAAGGGAGGGAGAAAAAGGGAAGAAGGGAGAGGAACAA	hap_03	hap_01	AA	4	NA	TT	NA	SINE/SINE
discovery	roan	dog_1138	ATAAAAAAGGAGGGGAAGGGAGGGAGAAAAAGGGGAGGACGGGGAGGAGAAG	ATAAAAAAGGAGGGGAAGGGAGGGAGAAAAAGGGAAGAAGGGAGAGGAAAAG	hap_03	hap_04	AA	4	1	TT	NA	SINE/SINE
discovery	roan	dog_1149	ATAAAAAAGGAGGGGAAGGGAGGGAGAAAAAGGGAAGAAGGGAGAGGAACAA	ATAAAAAAGGAGGGGAAGGGAGGGAGAAAAAGGGAAGAAGGGGGAGGAACAG	hap_01	hap_09	AA	4	NA	TT	NA	SINE/SINE
discovery	roan	dog_1150	ATAAAAAAGGAGGGGAAGGGAGGGAGAAAAAGGGAAGAAGGGGGAGGAACAA	ATAAAAAAGGAGGGGAAGGGAGGGAGAAAAAGGGGAGGACGGGGAGGAACAA	hap_02	hap_08	AA	4	NA	TT	NA	SINE/SINE
discovery	roan	dog_1153	ATAAAAAAGGAGGGGAAGGGAGGGAGAAAAAGGGAAGAAGGGGGAGGAACAA	ATAAAAAAGGAGGGGAAGGGAGGGAGAAAAAGGGAAGAAGGGAGAGGAACAA	hap_02	hap_01	AA	4	1	TT	NA	SINE/SINE
discovery	roan	dog_1155	ATAAAAAAGGAGGGGAAGGGAGGGAGAAAAAGGGGAGGACGGGGAGGAGAAG	GAGAAAGAGAGAGGGGGGGGAGGGCGAAGAAGGAGGGGAGGGGGAGGAACAA	hap_03	hap_r21	AG	3	1	TC	NA	SINE/SINE
discovery	roan	dog_1170	GAAAAAGAGAGAGGGGGGAAAGAGAGAAAAAGGGAAGAAGGGAGAGGAACAA	ATAAAAAAGGAGGGGAAGGGAGGGAGAAAAAGGGGAGGACGGGGAGGAGAAG	hap_GG01	hap_03	AG	4	NA	TT	NA	SINE/SINE
discovery	roan	dog_1180	GAAAAAAAGAGGGGGGGGAGGGGGAGGGGAAGAAGAGAAGAAGAAGGAGCAG	ATAAAAAAGGAGGGGAAGGGAGGGAGAAAAAGGGAAGAAGGGAGAGGAAAAG	hap_c12	hap_04	AG	3	NA	TC	NA	SINE/SINE
discovery	roan	dog_1183	ATAAAAAAGGAGGGGAAGGGAGGGAGAAAAAGGGGAGGACGGGGAGGAGAAG	ATAAAAAAGGAGGGGAAGGGAGGGAGAAAAAGGGGAGGACGGGGAGGAGAAG	hap_03	hap_03	AA	4	NA	TT	NA	SINE/SINE
discovery	roan	dog_1185	ATAAAAAAGGAGGGGAAGGGAGGGAGAAAAAGGGAAGAAGGGAGAGGAACAA	ATAAAAAAGGAGGGGAAGGGAGGGAGAAAAAGGGAAGAAGGGGGAGGAACAA	hap_01	hap_02	AA	4	1	TT	NA	SINE/-
discovery	roan	dog_1188	GAGAAAGAGAGAGGGGGGGGAGGGCGAAGAAGGAGGGGAGGGGGAGGAGAAG	ATAAAAAAGGAGGGGAAGGGAGGGAGAAAAAGGGAAGAAGGGAGAGGAACAA	hap_c130	hap_01	AG	3	NA	TC	NA	SINE/SINE
discovery	roan	dog_1189	ATAAAAAAGGAGGGGAAGGGAGGGAGAAAAAGGGAAGAAGGGAGAGGAACAA	ATAAAAAAGGAGGGGAAGGGAGGGAGAAAAAGGGGAGGACGGGGAGGAGAAG	hap_01	hap_03	AA	4	NA	TT	NA	SINE/SINE
discovery	roan	dog_1193	ATAAAAAAGGAGGGGAAGGGAGGGAGAAAAAGGGAAGAAGGGAGAGGAACAA	ATAAAAAAGGAGGGGAAGGGAGGGAGAAAAAGGGAGGGGCGAGAAGGAGCGG	hap_01	hap_05	AA	4	1	TT	TT	SINE/-
discovery	roan	dog_1194	ATAAAAAAGGAGGGGAAGGGAGGGAGAAAAAGGGAGGGGCGAGAAGGAGCGG	ATAAAAAAGGAGGGGAAGGGAGGGAGAAAAAGGGAGGGGCGAGAAGGAGCGG	hap_05	hap_05	AA	4	1	TT	NA	SINE/SINE
discovery	roan	dog_1195	ATAAAAAAGGAGGGGAAGGGAGGGAGAAAAAGGGAAGAAGGGAGAGGAACAA	ATAAAAAAGGAGGGGAAGGGAGGGAGAAAAAGGGAAGAAGGGAGAGGAACAA	hap_01	hap_01	AA	4	1	TT	TT	SINE/SINE
discovery	roan	dog_1196	ATAAAAAAGGAGGGGAAGGGAGGGAGAAAAAGGGAAGAAGGGAGAGGAACAA	ATAAAAAAGGAGGGGAAGGGAGGGAGAAAAAGGGAAGAAGGGAGAGGAACAA	hap_01	hap_01	AA	4	NA	TT	NA	SINE/SINE
discovery	roan	dog_1202	ATAAAAAAGGAGGGGAAGGGAGGGAGAAAAAGGGAAGAAGGGAGAGGAACAA	ATAAAAAAGGAGGGGAAGGGAGGGAGAAAAAGGGAAGAAGGGAGAGGAACAA	hap_01	hap_01	AA	4	NA	TT	NA	SINE/SINE
discovery	roan	dog_1203	ATAAAAAAGGAGGGGAAGGGAGGGAGAAAAAGGGAAGAAGGGGGAGGAACAA	ATAAAAAAGGAGGGGAAGGGAGGGAGAAAAAGGGAAGGACGGGGAGGAGAAG	hap_02	hap_10	AA	4	NA	TT	NA	SINE/SINE
discovery	roan	dog_1206	GAAAAGAGGGGGGAGAGGAGGGAGAGGGGAAGGGGAGAAGAGGGGAAAGCAG	ATAAAAAAGGAGGGGAAGGGAGGGAGAAAAAGGGAAGAAGGGAGAGGAACAA	hap_r10	hap_01	AG	3	NA	TC	NA	SINE/SINE
discovery	roan	dog_1209	ATAAAAAAGGAGGGGAAGGGAGGGAGAAAAAGGGAAGAAGGGGGAGGAACAA	GAAAAAGAGAGAGGGGGGAAAGAGAGGAAAAGGAGGGAAGGAGAAGGAGCAG	hap_02	hap_r35	AG	3	1	0	CT	SINE/SINE
discovery	roan	dog_1210	ATAAAAAAGGAGGGGAAGGGAGGGAGAAAAAGGGAAGAAGGGGGAGGAACAA	ATAAAAAAGGAGGGGAAGGGAGGGAGAAAAAGGGAAGAAGGGAGAGGAACAA	hap_02	hap_01	AA	4	NA	TT	NA	SINE/SINE
discovery	roan	dog_1212	ATAAAAAAGGAGGGGAAGGGAGGGAGAAAAAGGGAAGAAGGGAGAGGAACAA	ATAAAAAAGGAGGGGAAGGGAGGGAGAAAAAGGGAAGAAGGGAGAGGAACAA	hap_01	hap_01	AA	4	1	TT	TT	SINE/SINE
discovery	roan	dog_1215	ATAAAAAAGGAGGGGAAGGGAGGGAGAAAAAGGGAAGAAGGGAGAGGAACAA	ATAAAAAAGGAGGGGAAGGGAGGGAGAAAAAGGGGAGGACGGGGAGGAGAAG	hap_01	hap_03	AA	4	NA	TT	NA	SINE/SINE
discovery	roan	dog_1216	ATAAAAAAGGAGGGGAAGGGAGGGAGAAAAAGGGAAGAAGGGAGAGGAACAA	GAGAAAGAGGGAGGGAGGGAGGAGAGAAAAAGGGAAGAAGGGAGAGGAACAA	hap_01	hap_r02	AG	3	NA	0	NA	SINE/SINE
discovery	roan	dog_1217	GAGAAAGAGGGAGGGAGGGAGGAGAGAAAAAGGGAAGAAGAGGGAGGAGAAG	ATAAAAAAGGAGGGGAAGGGAGGGAGAAAAAGGGAAGAAGGGAGAGGAACAA	hap_r19	hap_01	AG	3	NA	0	NA	SINE/SINE
discovery	roan	dog_1218	ATAAAAAAGGAGGGGAAGGGAGGGAGAAAAAGGGAAGAAGGGAGAGGAACAA	ATAAAAAAGGAGGGGAAGGGAGGGAGAAAAAGGGAAGAAGGGAGAGGAACAA	hap_01	hap_01	AA	4	NA	TT	NA	SINE/SINE
discovery	roan	dog_1219	ATAAAAAAGGAGGGGAAGGGAGGGAGAAAAAGGGAGGGGCGAGAAGGAGCGG	ATAAAAAAGGAGGGGAAGGGAGGGAGAAAAAGGGAAGAAGGGAGAGGAACAA	hap_05	hap_01	AA	4	1	TT	NA	SINE/SINE
discovery	roan	dog_1220	GAAAAAAAGGAGGGGGGGAGGGAGAGGGGAGGGGGAGAAGGAGGAGGAGCAG	ATAAAAAAGGAGGGGAAGGGAGGGAGAAAAAGGGGAGGACGGGGAGGAGAAG	hap_r41	hap_03	AG	3	NA	TC	NA	SINE/SINE
discovery	roan	dog_1222	ATAAAAAAGGAGGGGAAGGGAGGGAGAAAAAGGGAAGAAGGGAGAGGAACAA	ATAAAAAAGGAGGGGAAGGGAGGGAGAAAAAGGGAAGAAGGGAGAGGAACAA	hap_01	hap_01	AA	4	NA	TT	NA	SINE/-
discovery	roan	dog_1224	ATAAAAAAGGAGGGGAAGGGAGGGAGAAAAAGGGAAGAAGGGAGAGGAACAA	GAGGAGAAGAGAGGGGGGGGAGAGCGGAGAAGGGGAGAAGAGGGAGGAGCGG	hap_01	hap_c107	AG	3	1	TC	NA	SINE/SINE
discovery	roan	dog_1227	ATAAAAAAGGAGGGGAAGGGAGGGAGAAAAAGGGAGGGGCGAGAAGGAGCGG	ATAAAAAAGGAGGGGAAGGGAGGGAGAAAAAGGGAAGAAGGGAGAGGAACAA	hap_05	hap_01	AA	4	NA	TT	NA	SINE/SINE
discovery	roan	dog_1229	ATGGAGAAGAGAGGGGGGGGAGAGCGGAGAAGGGGAGAAGAGGGAGGAGCGG	ATAAAAAAGGAGGGGAAGGGAGGGAGAAAAAGGGAAGAAGGGAGAGGAACAA	hap_r45	hap_01	AG	3	NA	TC	NA	SINE/SINE
discovery	roan	dog_1231	ATAAAAAAGGAGGGGAAGGGAGGGAGAAAAAGGGAAGAAGGGAGAGGAACAA	ATAAAAAAGGAGGGGAAGGGAGGGAGAAAAAGGGAAGAAGGGAGAGGAACAA	hap_01	hap_01	AA	4	NA	TT	NA	SINE/SINE
discovery	roan	dog_1240	ATGAAAGAGAGAGGGGGGGGGGGGAGGAAAGGGAGAGAAGAGGGAGGAGCGG	ATAAAAAAGGAGGGGAAGGGAGGGAGAAAAAGGGAAGAAGGGGGAGGAACAA	hap_c03	hap_02	AG	3	NA	TC	NA	SINE/SINE
discovery	roan	dog_1243	ATAAAAAAGGAGGGGAAGGGAGGGAGAAAAAGGGAAGAAGGGGGAGGAACAA	GAAAAAGAGAGAGGGGGGAAAGAGAGAAAAAGGGAAGAAGGGAGAGGAACAA	hap_02	hap_GG01	AG	4	NA	TT	NA	SINE/SINE
discovery	roan	dog_1245	GAAAAAGAGAGAGGGGGGGGAGAGAGGGGCAGGAGAGAAGGGGGAGGCGAAA	ATAAAAAAGGAGGGGAAGGGAGGGAGAAAAAGGGAAGAAGGGAGAGGAACAA	hap_r31	hap_01	AG	3	NA	TC	NA	SINE/-
discovery	roan	dog_1250	ATAAAAAAGGAGGGGAAGGGAGGGAGAAAAAGGGAAGAAGGGAGAGGAACAA	ATAAAAAAGGAGGGGAAGGGAGGGAGAAAAAGGGAAGAAGGGAGAGGAACAA	hap_01	hap_01	AA	4	NA	TT	NA	SINE/SINE
discovery	roan	dog_1251	ATAAAAAAGGAGGGGAAGGGAGGGAGAAAAAGGGAAGAAGGGAGAGGAACAA	GAAAAAGAGAGAGGGGGGAAAGAGAGAAAAAGGGAAGAAGGGAGAGGAACAA	hap_01	hap_GG01	AG	4	NA	TT	NA	SINE/SINE
discovery	roan	dog_1253	GAAAAGAGGGGGGAGAGGAGGGAGAGGGGAAGGGGAGAAGAGGGGAAAGCAG	ATAAAAAAGGAGGGGAAGGGAGGGAGAAAAAGGGAAGAAGGGAGAGGAACAA	hap_r10	hap_01	AG	3	NA	TC	NA	SINE/SINE
discovery	roan	dog_1258	ATAAAAAAGGAGGGGAAGGGAGGGAGAAAAAGGGGAGGACGGGGAGGAGAAG	ATAAAAAAGGAGGGGAAGGGAGGGAGAAAAAGGGGAGGACGGGGAGGAGAAG	hap_03	hap_03	AA	4	NA	TT	NA	SINE/-
discovery	roan	dog_1263	ATAAAAAAGGAGGGGAAGGGAGGGAGAAAAAGGGAGGGGCGAGAAGGAGCGG	ATAAAAAAGGAGGGGAAGGGAGGGAGAAAAAGGGAGGGGCGAGAAGGAGCGG	hap_05	hap_05	AA	4	NA	TT	NA	SINE/SINE
discovery	roan	dog_1274	ATAAAAAAGGAGGGGAAGGGAGGGAGAAAAAGGGAAGAAGGGGGAGGAACAA	ATAAAAAAGGAGGGGAAGGGAGGGAGAAAAAGGGGAGGACGGGGAGGAGAAG	hap_02	hap_03	AA	4	NA	TT	NA	SINE/SINE
discovery	roan	dog_1275	ATAAAAAAGGAGGGGAAGGGAGGGAGAAAAAGGGAAGAAGGGAGAGGAACAA	ATAAAAAAGGAGGGGAAGGGAGGGAGAAAAAGGGAGGGGCGAGAAGGAGCGG	hap_01	hap_05	AA	4	NA	TT	NA	SINE/SINE
discovery	roan	dog_1277	GAAAAAGAGAGAGGGGGAAAAAGGAGGGGAAAGGAAGAAGAGGGAGGAGCGG	ATAAAAAAGGAGGGGAAGGGAGGGAGAAAAAGGGGAGGACGGGGAGGAGAAG	hap_c21	hap_03	AG	3	NA	TC	NA	SINE/-
discovery	roan	dog_1279	ATAAAAAAGGAGGGGAAGGGAGGGAGAAAAAGGGAAGAAGGGAGAGGAACAA	ATAAAAAAGGAGGGGAAGGGAGGGAGAAAAAGGGAAGAAGGGAGAGGAAAAG	hap_01	hap_04	AA	4	1	TT	NA	SINE/SINE
discovery	roan	dog_1280	GAGAAAGAGGGAGGGGGGAGGGGGCGAAGAAGAAGAGAAGAGGGAGGAGCAG	ATAAAAAAGGAGGGGAAGGGAGGGAGAAAAAGGGGAGGACGGGGAGGAGAAG	hap_r16	hap_03	AG	3	NA	TC	NA	SINE/SINE
discovery	roan	dog_1284	ATAAAAAAGGAGGGGAAGGGAGGGAGAAAAAGGGAAGAAGGGAGAGGAACAA	GAGAAAGAGGGAGGGAGGGAGGAGAGAAAAAGGGAAGAAGGGAGAGGAACAA	hap_01	hap_r02	AG	3	NA	0	NA	SINE/SINE
discovery	roan	dog_1289	ATAAAAAAGGAGGGGAAGGGAGGGAGAAAAAGGGAGGGGCGAGAAGGAGCGG	ATAAAAAAGGAGGGGAAGGGAGGGAGAAAAAGGGAGGGGCGAGAAGGAGCGG	hap_05	hap_05	AA	4	NA	TT	NA	SINE/SINE
discovery	roan	dog_1295	ATAAAAAAGGAGGGGAAGGGAGGGAGAAAAAGGGAAGAAGGGGGAGGAACAA	GAAAAAGAGAGAGGGGGGAAAGAGAGAAAAAGGGAAGAAGGGAGAGGAACAA	hap_02	hap_GG01	AG	4	NA	TT	NA	SINE/SINE
discovery	roan	dog_1297	ATAAAAAAGGAGGGGAAGGGAGGGAGAAAAAGGGAAGAAGGGGGAGGAACAA	ATAAAAAAGGAGGGGAAGGGAGGGAGAAAAAGGGGAGGACGGGGAGGAGAAG	hap_02	hap_03	AA	4	NA	TT	NA	SINE/SINE
discovery	roan	dog_1299	ATAAAAAAGGAGGGGAAGGGAGGGAGAAAAAGGGAAGAAGGGGGAGGAACAA	GAAAAAGAGAGAGGGGGGAAAGAGAGAAAAAGGGAAGAAGGGAGAGGAACAA	hap_02	hap_GG01	AG	4	NA	TT	NA	SINE/SINE
discovery	roan	dog_1301	ATAAAAAAGGAGGGGAAGGGAGGGAGAAAAAGGGAAGAAGGGAGAGGAACAA	GAAAAAAAGGAGGGGAAGGGAGGGAGAAAAAGGGAAGAAGGGAGAGGAACAA	hap_01	hap_06	AA	4	NA	TT	NA	SINE/SINE
discovery	roan	dog_1302	ATAAAAAAGGAGGGGAAGGGAGGGAGAAAAAGGGAAGAAGGGGGAGGAACAA	ATAAAAAAGGAGGGGAAGGGAGGGAGAAAAAGGGAAGAAGGGGGAGGAACAA	hap_02	hap_02	AA	4	NA	TT	NA	SINE/SINE
discovery	roan	dog_1309	ATAAAAAAGGAGGGGAAGGGAGGGAGAAAAAGGGGAGGACGGGGAGGAGAAG	GAAAAAGAGAGAGGGGGGAAAGAGAGAAAAAGGGAAGAAGGGAGAGGAACAA	hap_03	hap_GG01	AG	4	NA	TT	NA	SINE/SINE
discovery	roan	dog_1314	ATAAAAAAGGAGGGGAAGGGAGGGAGAAAAAGGGAAGAAGGGGGAGGAACAA	ATAAAAAAGGAGGGGAAGGGAGGGAGAAAAAGGGAAGAAGGGGGAGGAACAA	hap_02	hap_02	AA	4	NA	TT	NA	SINE/SINE
discovery	roan	dog_1321	GAAGAGAGAAGGGGGGGGGGAGAGAGGAGAAGGGGAGAACGAGAAGGAGCGG	ATAAAAAAGGAGGGGAAGGGAGGGAGAAAAAGGGAAGAAGGGAGAGGAACAA	hap_r01	hap_01	AG	3	NA	TC	NA	SINE/SINE
discovery	roan	dog_1322	ATAAAAAAGGAGGGGAAGGGAGGGAGAAAAAGGGAAGAAGGGGGAGGAACAA	ATAAAAAAGGAGGGGAAGGGAGGGAGAAAAAGGGGAGGACGGGGAGGAGAAG	hap_02	hap_03	AA	4	NA	TT	NA	SINE/SINE
discovery	roan	dog_1328	ATAAAAAAGGAGGGGAAGGGAGGGAGAAAAAGGGGAGGACGGGGAGGAGAAG	ATAAAAAAGGAGGGGAAGGGAGGGAGAAAAAGGGGAGGACGGGGAGGAGAAG	hap_03	hap_03	AA	4	NA	TT	NA	SINE/SINE
discovery	roan	dog_1329	ATAAAAAAGGAGGGGAAGGGAGGGAGAAAAAGGGAAGAAGGGGGAGGAACAA	ATAAAAAAGGAGGGGAAGGGAGGGAGAAAAAGGGGAGGACGGGGAGGAGAAG	hap_02	hap_03	AA	4	NA	TT	NA	SINE/SINE
discovery	roan	dog_1330	ATAAAAAAGGAGGGGAAGGGAGGGAGAAAAAGGGAAGAAGGGAGAGGAAAAG	ATAAAAAAGGAGGGGAAGGGAGGGAGAAAAAGGGAAGAAGGGGGAGGAACAA	hap_04	hap_02	AA	4	NA	TT	NA	SINE/SINE
discovery	roan	dog_1333	ATAAAAAAGGAGGGGAAGGGAGGGAGAAAAAGGGAAGAAGGGGGAGGAACAA	ATAAAAAAGGAGGGGAAGGGAGGGAGAAAAAGGGAAGAAGGGGGAGGAACAA	hap_02	hap_02	AA	4	NA	TT	NA	SINE/SINE
discovery	roan	dog_1336	ATAAAAAAGGAGGGGAAGGGAGGGAGAAAAAGGGAAGAAGGGAGAGGAACAA	ATAAAAAAGGAGGGGAAGGGAGGGAGAAAAAGGGAGGGGCGAGAAGGAGCGG	hap_01	hap_05	AA	4	1	TT	NA	SINE/SINE
discovery	roan	dog_1337	ATAAAAAAGGAGGGGAAGGGAGGGAGAAAAAGGGAAGAAGGGAGAGGAACAA	ATAAAAAAGGAGGGGAAGGGAGGGAGAAAAAGGGAAGAAGGGAGAGGAACAA	hap_01	hap_01	AA	4	NA	TT	NA	SINE/SINE
discovery	roan	dog_1340	ATAAAAAAGGAGGGGAAGGGAGGGAGAAAAAGGGGAGGACGGGGAGGAGAAG	ATAAAAAAGGAGGGGAAGGGAGGGAGAAAAAGGGGAGGACGGGGAGGAGAAG	hap_03	hap_03	AA	4	NA	TT	NA	SINE/SINE
discovery	roan	dog_1343	GAGAAAGAGAGAGGGGGGGGAGGGCGAAGAAGGAGGGAAGAGGGAGGAGCGG	GAAAAAAAGGAGGGGGGGGGAGGGAGGAAAAGGAGGGAAGGAGGAGGCACAA	hap_c74	hap_GG02	GG	3	1	TC	NA	SINE/SINE
discovery	roan	dog_1347	ATAAAAAAGGAGGGGAAGGGAGGGAGAAAAAGGGAAGAAGGGGGAGGAACAA	ATAAAAAAGGAGGGGAAGGGAGGGAGAAAAAGGGAAGAAGGGGGAGGAACAA	hap_02	hap_02	AA	4	NA	TT	NA	SINE/SINE
discovery	roan	dog_1362	ATAAAAAAGGAGGGGAAGGGAGGGAGAAAAAGGGGAGGACGGGGAGGAGAAG	ATAAAAAAGGAGGGGAAGGGAGGGAGAAAAAGGGGAGGACGGGGAGGAGAAG	hap_03	hap_03	AA	4	NA	TT	NA	SINE/SINE
discovery	roan	dog_1363	ATAAAAAAGGAGGGGAAGGGAGGGAGAAAAAGGGAAGAAGGGAGAGGAACAA	ATAAAAAAGGAGGGGAAGGGAGGGAGAAAAAGGGAAGAAGGGAGAGGAACAA	hap_01	hap_01	AA	4	NA	TT	NA	SINE/SINE
discovery	roan	dog_1366	ATAAAAAAGGAGGGGAAGGGAGGGAGAAAAAGGGAAGAAGGGGGAGGAACAA	ATAAAAAAGGAGGGGAAGGGAGGGAGAAAAAGGGAAGAAGGGGGAGGAACAA	hap_02	hap_02	AA	4	NA	TT	NA	SINE/SINE
discovery	roan	dog_1372	ATAAAAAAGGAGGGGAAGGGAGGGAGAAAAAGGGAAGAAGGGGGAGGAACAA	ATAAAAAAGGAGGGGAAGGGAGGGAGAAAAAGGGAAGAAGGGGGAGGAACAA	hap_02	hap_02	AA	4	NA	TT	NA	SINE/SINE
discovery	roan	dog_1378	ATAAAAAAGGAGGGGAAGGGAGGGAGAAAAAGGGAAGAAGGGAGAGGAACAA	ATAAAAAAGGAGGGGAAGGGAGGGAGAAAAAGGGAAGAAGGGGGAGGAACAA	hap_01	hap_02	AA	4	NA	TT	NA	SINE/SINE
discovery	roan	dog_1382	ATAAAAAAGGAGGGGAAGGGAGGGAGAAAAAGGGAAGAAGGGGGAGGAACAA	ATAAAAAAGGAGGGGAAGGGAGGGAGAAAAAGGGAAGAAGGGGGAGGAACAA	hap_02	hap_02	AA	4	NA	TT	NA	SINE/SINE
discovery	roan	dog_1383	GAAGAGAGAAGGGGGGGGGGAGAGAGGAGAAGGGGAGAACGAGAAGGAGCGG	ATAAAAAAGGAGGGGAAGGGAGGGAGAAAAAGGGAAGAAGGGAGAGGAACAA	hap_r01	hap_01	AG	3	NA	TC	NA	SINE/SINE
discovery	roan	dog_1384	ATAAAAAAGGAGGGGAAGGGAGGGAGAAAAAGGGAAGAAGGGAGAGGAACAA	ATAAAAAAGGAGGGGAAGGGAGGGAGAAAAAGGGAAGAAGGGAGAGGAACAA	hap_01	hap_01	AA	4	NA	TT	NA	SINE/SINE
discovery	roan	dog_1387	GAAGAGAGAAGGGGGGGGGGAGAGAGGAGAAGGGGAGAACGAGAAGGAGCGG	ATAAAAAAGGAGGGGAAGGGAGGGAGAAAAAGGGAAGAAGGGAGAGGAACAA	hap_r01	hap_01	AG	3	NA	TC	NA	SINE/SINE
discovery	roan	dog_1389	ATAAAAAAGGAGGGGAGGAAAGAGAGAAAAAGGGAAGAAGGGAGAGGAACAA	ATAAAAAAGGAGGGGAAGGGAGGGAGAAAAAGGGAAGAAGGGGGAGGAACAA	hap_r55	hap_02	AG	3	NA	0	NA	SINE/SINE
discovery	roan	dog_1390	ATAAAAAAGGAGGGGAAGGGAGGGAGAAAAAGGGAGGGGCGAGAAGGAGCGG	ATAAAAAAGGAGGGGAAGGGAGGGAGAAAAAGGGAAGAAGGGAGAGGAACAA	hap_05	hap_01	AA	4	NA	TT	NA	SINE/SINE
discovery	roan	dog_1392	ATAAAAGAGAGGGGGAGGGGAGGGAGGGGAAGGGGAGGGCGAGAAGGAGCGG	ATAAAAAAGGAGGGGAAGGGAGGGAGAAAAAGGGAAGAAGGGAGAGGAACAA	hap_r52	hap_01	AG	3	NA	TC	NA	SINE/SINE
discovery	roan	dog_1393	ATAAAAAAGGAGGGGAAGGGAGGGAGAAAAAGGGAAGAAGGGAGAGGAAAAG	ATAAAAAAGGAGGGGAAGGGAGGGAGAAAAAGGAGAGAAGAGGGAGGAGCGG	hap_04	hap_20	AA	4	NA	TT	NA	SINE/SINE
discovery	roan	dog_1394	GTAAAAAAGGAAGGGAGGAAAGGGAGGAAAAGAAGGGAAGGGGGAAGAGCGG	ATAAAAAAGGAGGGGAAGGGAGGGAGAAAAAGGGAAGAAGGGGGAGGAACAA	hap_r15	hap_02	AG	3	NA	TC	NA	SINE/SINE
discovery	roan	dog_1397	GAGGAGAAGAGAGGGGGGGGAGAGCGGAGAAGGGGAGAAGAGGGAGGAGAAG	ATAAAAAAGGAGGGGAAGGGAGGGAGAAAAAGGGAAGAAGGGAGAGGAACAA	hap_r08	hap_01	AG	3	1	TC	NA	SINE/SINE
discovery	roan	dog_1399	ATAAAAAAGGAGGGGAAGGGAGGGAGAAAAAGGGAAGAAGGGAGAGGAAAAG	ATAAAAAAGGAGGGGAAGGGAGGGAGAAAAAGGGAAGAAGGGAGAGGAACAA	hap_04	hap_01	AA	4	NA	TT	NA	SINE/SINE
discovery	roan	dog_1404	GAAGAGAGAAGGGGGGGGGGAGAGAGGAGAAGGGGAGAACGAGAAGGAGCGG	ATAAAAAAGGAGGGGAAGGGAGGGAGAAAAAGGGAAGAAGGGAGAGGAACAA	hap_r01	hap_01	AG	3	1	TC	CT	SINE/SINE
discovery	roan	dog_1416	ATAAAAAAGGAGGGGAAGGGAGGGAGAAAAAGGGAAGAAGGGGGAGGAACAA	GAAGGGGAGGGGAGAAGGGGAGAGAGGGGAAAGGGAGAAGGGGGAGGAGCAG	hap_02	hap_r23	AG	3	1	TC	NA	SINE/SINE
discovery	roan	dog_1418	GAAGGGGAGGGGAGAAGGGGAGAGAGGGGAGGGGGAGAAGGGGGAGGAGCGG	ATAAAAAAGGAAGGGGGGGGAGGGAGAAAAAGGGGAAAACGAGAAGGAGAAG	hap_c57	hap_r56	GG	3	1	TC	NA	SINE/SINE
discovery	roan	dog_1421	ATAAAAAAGGAGGGGAAGGGAGGGAGAAAAAGGGAAGAAGGGAGAGGAACAA	ATAAAAAAGGAGGGGAAGGGAGGGAGAAAAAGGGAAGAAGGGAGAGGAACAA	hap_01	hap_01	AA	4	NA	TT	NA	SINE/SINE
discovery	roan	dog_1422	ATAAAAAAGGAGGGGAAGGGAGGGAGAAAAAGGGAGGGGCGAGAAGGAGCGG	ATAAAAAAGGAGGGGAAGGGAGGGAGAAAAAGGGAGGGGCGAGAAGGAGCGG	hap_05	hap_05	AA	4	1	TT	TT	SINE/-
discovery	roan	dog_1426	ATAAAAAAGGAGGGGAAGGGAGGGAGAAAAAGGGAAGAAGGGAGAGGAACAA	ATAAAAAAGGAGGGGAAGGGAGGGAGAAAAAGGGAAGAAGGGAGAGGAAAAG	hap_01	hap_04	AA	4	1	TT	TT	SINE/-
discovery	roan	dog_1428	ATAAAAAAGGAGGGGAAGGGAGGGAGAAAAAGGGAAGAAGGGAGAGGAACAA	ATAAAAAAGGAGGGGAAGGGAGGGAGAAAAAGGGAAGAAGGGAGAGGAACAA	hap_01	hap_01	AA	4	1	TT	TT	SINE/SINE
discovery	roan	dog_1432	ATAAAAAAGGAGGGGAAGGGAGGGAGAAAAAGGGAAGAAGGGAGAGGAAAAG	GAAAAAAAGGAGGGGGGGAGGGGGAGGAGCAGGGGAGAAGAGGAAGGAACGG	hap_04	hap_r40	AG	3	1	TC	NA	SINE/SINE
discovery	roan	dog_1433	ATAAAAAAGGAGGGGAAGGGAGGGAGAAAAAGGGAAGAAGGGGGAGGAACAA	ATAAAAAAGGAGGGGAAGGGAGGGAGAAAAAGGGGAGGACGGGGAGGAGAAG	hap_02	hap_03	AA	4	NA	TT	NA	SINE/-
discovery	roan	dog_1435	GAAAAAAAGGGGGAGAGGAGAGGGAGGAGAAGGGGAGAAGAGGGAGGAACAA	ATAAAAAAGGAGGGGAAGGGAGGGAGAAAAAGGGGAGGACGGGGAGGAGAAG	hap_c202	hap_03	AG	3	NA	TC	NA	SINE/SINE
discovery	roan	dog_1436	ATGAAAGAGAAAGAGAGGAGAGGGAGGAAAAGGGGAGAAGAGGGAGGAGCAG	ATAAAAAAGGAGGGGAAGGGAGGGAGAAAAAGGGAAGAAGGGAGAGGAACAA	hap_c27	hap_01	AG	3	NA	TC	NA	SINE/-
discovery	roan	dog_1447	ATAAAAAAGGAGGGGAAGGGAGGGAGAAAAAGGGAAGAAGGGGGAGGAACAA	GAAAAAGAGAGAGGGGGGAAAGAGAGAAAAAGGGAAGAAGGGAGAGGAACAA	hap_02	hap_GG01	AG	4	NA	TT	NA	SINE/SINE
discovery	roan	dog_1448	GAAAAAGAGAGAGGGGGGAAAGAGAGAAAAAGGGAAGAAGGGGGAGGAGAAG	ATAAAAAAGGAGGGGAAGGGAGGGAGAAAAAGGGAAGAAGGGAGAGGAAAAG	hap_r04	hap_04	AG	3	NA	TT	NA	SINE/SINE
discovery	roan	dog_1449	ATAAAAAAGGAGGGGAAGGGAGGGAGAAAAAGGGAAGAAGGGAGAGGAACAA	ATAAAAAAGGAGGGGAAGGGAGGGAGAAAAAGGGAAGAAGGGGGAGGAACAA	hap_01	hap_02	AA	4	NA	TT	NA	SINE/SINE
discovery	roan	dog_1454	ATAAAAAAGGAGGGGAAGGGAGGGAGAAAAAGGGAAGAAGGGAGAGGAAAAG	ATAAAAAAGGAGGGGAAGGGAGGGAGAAAAAGGGAAGAAGGGAGAGGAAAAG	hap_04	hap_04	AA	4	NA	TT	NA	SINE/SINE
discovery	roan	dog_1460	ATAAAAAAGGAGGGGAAGGGAGGGAGAAAAAGGGAGGGGCGAGAAGGAGCGG	ATAAAAAAGGAGGGGAAGGGAGGGAGAAAAAGGGAAGAAGGGAGAGGAACAA	hap_05	hap_01	AA	4	NA	TT	NA	SINE/SINE
discovery	roan	dog_1463	ATAAAAAAGGAGGGGAAGGGAGGGAGAAAAAGGGAAGAAGGGAGAGGAACAA	GAGAAAGAGAGAGGGGGGGGAGAGAGGGGCAGGAGAGAAGAAGAGAAAACAA	hap_01	hap_r03	AG	3	1	TC	NA	SINE/SINE
discovery	roan	dog_1471	ATAAAAAAGGAGGGGAAGGGAGGGAGAAAAAGGGAAGAAGGGAGAGGAAAAG	GTGAAAGAGAGAGGGGGGAGAAGGAGGAGAAGGAGGGGAGGGGGAGGAGCGG	hap_04	hap_r06	AG	3	1	0	CT	SINE/SINE
discovery	roan	dog_1472	GAAAAAGAGAGAGGGGGGAAAGAGAGAAAAAGGGAAGAAGGGAGAGGAACAA	GAAAAAAAGGAGGGGAAGGGAGGGAGAAAAAGGGGAGGACGGGGAGGAGAAG	hap_GG01	hap_11	AG	4	1	TT	TT	SINE/SINE
discovery	roan	dog_1473	ATAAAAAAGGAGGGGAAGGGAGGGAGAAAAAGGGAAGAAGGGGGAGGAACAA	GAAAAAGAGAGAGGGGGGAAAGAGAGAAAAAGGGAAGAAGGGAGAGGAACAA	hap_02	hap_GG01	AG	4	NA	TT	NA	SINE/SINE
discovery	roan	dog_1474	ATAAAAAAGGAGGGGAAGGGAGGGAGAAAAAGGGGAGGACGGGGAGGAGAAG	ATAAAAAAGGAGGGGAAGGGAGGGAGAAAAAGGGAAGAAGGGAGAGGAAAAG	hap_03	hap_04	AA	4	NA	TT	NA	SINE/SINE
discovery	roan	dog_1475	ATAAAAAAGGAGGGGAAGGGAGGGAGAAAAAGGGAAGAAGGGAGAGGAACAA	ATAGGGGAGGGGAGAAGGAGAAGGCGAAAAAAAGGAGAAGAGAGAGAAGCAG	hap_01	hap_r48	AG	3	NA	TC	NA	SINE/SINE
discovery	roan	dog_1476	ATAAAAAAGGAGGGGAAGGGAGGGAGAAAAAGGGAAGAAGGGGGAGGAACAA	ATGAAAGAGAGAGGGGGGGGGGGGAGGAAAGGGAGAGAAGAGGGAGGAGCGG	hap_02	hap_c03	AG	3	NA	TC	NA	SINE/SINE
discovery	roan	dog_1492	ATAAAAAAGGAGGGGAAGGGAGGGAGAAAAAGGGAAGAAGGGAGAGGAACAA	GAAAAAGAGAGGGGGAGGGGAGGGAGGAGAAGAGGAGGACGGGGAGGAGCAG	hap_01	hap_c05	AG	3	1	TC	NA	SINE/SINE
discovery	roan	dog_1495	GAAAAAGAGAGAGGGGGGAAAGAGAGAAAAAGGGAAGAAGGGAGAGGAACAA	ATAAAAAAGGAGGGGAAGGGAGGGAGAAAAAGGGAAGAAGGGGGAGGAACAA	hap_GG01	hap_02	AG	4	NA	TT	NA	SINE/SINE
discovery	roan	dog_1497	GAAAAAGAGAGAGGGGGGAAAGAGAGAAAAAGGGAAGAAGGGAGAGGAACAA	ATAAAAAAGGAGGGGAAGGGAGGGAGAAAAAGGGGAGGACGGGGAGGAGAAG	hap_GG01	hap_03	AG	4	NA	TT	NA	SINE/SINE
discovery	roan	dog_1500	ATAAAAAAGGAGGGGAAGGGAGGGAGAAAAAGGGAAGAAGGGGGAGGAACAA	ATAAAAAAGGAGGGGAAGGGAGGGAGAAAAAGGGAAGAAGGGGGAGGAACAA	hap_02	hap_02	AA	4	NA	TT	NA	SINE/SINE
discovery	roan	dog_1501	ATAAAAAAGGAGGGGAAGGGAGGGAGAAAAAGGGAAGAAGGGGGAGGAACAA	GTGAAAGAGAGAGGGGGGAGAAGGAGGAGAAGGAGGGGAGGGGGAGGAGCAA	hap_02	hap_r07	AG	3	1	0	CT	SINE/SINE
discovery	roan	dog_1502	ATAAAAAAGGAGGGGAAGGGAGGGAGAAAAAGGGGAGGACGGGGAGGAGAAG	AAAGGGAGGAAGGGGAGAAGGGGGCAAGAAAGGGGAGAAGAGAGAGGAAAAG	hap_03	hap_c29	AG	3	1	TC	CT	SINE/SINE
discovery	roan	dog_1503	GAAGAGAGGAGAGGGGGGGGAGAGAGGGGAAGGGGAGGGGAGGGAGGAGCAG	ATAAAAAAGGAGGGGAAGGGAGGGAGAAAAAGGGAAGAAGGGGGAGGAACAA	hap_r26	hap_02	AG	3	NA	TC	NA	SINE/SINE
discovery	roan	dog_1506	AAAAAGAAGAGGGGGGGGAGAAAGAGGGGAAGGGAAGAAGGGGGAGGAACAA	ATAAAAAAGGAGGGGAAGGGAGGGAGAAAAAGGGAAGAAGGGAGAGGAACAA	hap_r59	hap_01	AG	3	NA	TC	NA	SINE/SINE
discovery	roan	dog_1509	GAGAAAGAGAGAGGGGGGGGAGAGAGGGGCAGGAGAGAAGAAGAGAAAACAA	ATAAAAAAGGAGGGGAAGGGAGGGAGAAAAAGGGAAGAAGGGAGAGGAACAA	hap_r03	hap_01	AG	3	NA	TC	NA	SINE/SINE
discovery	roan	dog_1511	ATAAAAAAGGAGGGGAAGGGAGGGAGAAAAAGGGAAGAAGGGGGAGGAACAA	ATAAAAAAGGAGGGGAAGGGAGGGAGAAAAAGGGGAGGACGGGGAGGAGAAG	hap_02	hap_03	AA	4	NA	TT	NA	SINE/SINE
discovery	roan	dog_1516	GAAAAAGAGAGAGGGGGGAAAGAGAGAAAAAGGGAAGAAGGGAGAGGAACAA	GAAAAAGAGAGAGGGGGGAAAGAGAGAAAAAGGGAAGAAGGGAGAGGAACAA	hap_GG01	hap_GG01	GG	4	NA	TT	NA	SINE/SINE
discovery	roan	dog_1517	ATAAAAAAGGAGGGGAAGGGAGGGAGAAAAAGGGAAGAAGGGGGAGGAACAA	ATAAAAGAGAGGGGGAGAAAGGGGAGGAGAAGGAGGGAAGGGGAAGGAACGG	hap_02	hap_c09	AG	3	NA	TC	NA	SINE/SINE
discovery	roan	dog_1518	ATAAAAAAGGAGGGGAAGGGAGGGAGAAAAAGGGGAGGACGGGGAGGAGAAG	ATAAAAAAGGAGGGGAAGGGAGGGAGAAAAAGGGAAGAAGGGGGAGGAACAA	hap_03	hap_02	AA	4	NA	TT	NA	SINE/SINE
discovery	roan	dog_1525	ATAAAAAAGGAGGGGAAGGGAGGGAGAAAAAGGGGAGGACGGGGAGGAGAAG	ATAAAAAAGGAGGGGAAGGGAGGGAGAAAAAGGGAAGAAGGGGGAGGAACAA	hap_03	hap_02	AA	4	NA	TT	NA	SINE/SINE
discovery	roan	dog_1528	ATAAAAAAGGAGGGGAAGGGAGGGAGAAAAAGGGAAGAAGGGAGAGGAACAA	ATAAAAAAGGAGGGGAAGGGAGGGAGAAAAAGGGGAGGACGGGGAGGAGAAG	hap_01	hap_03	AA	4	NA	TT	NA	SINE/SINE
discovery	roan	dog_1529	ATAAAAAAGGAGGGGAAGGGAGGGAGAAAAAGGGGAGGACGGGGAGGAGAAG	GAAAAAAAGGAGGGGGGGGGAGGACGAAAAAGGGGAGGACGGGGAGGAGAAG	hap_03	hap_r12	AG	3	1	TC	NA	SINE/SINE
discovery	roan	dog_1530	ATAAAAAAGGAGGGGAAGGGAGGGAGAAAAAGGGAAGAAGGGGGAGGAACAA	ATAAAAAAGGAGGGGAAGGGAGGGAGAAAAAGGGGAGGACGGGGAGGAGAAG	hap_02	hap_03	AA	4	NA	TT	NA	SINE/SINE
discovery	roan	dog_1533	ATAAAAAAGGAGGGGAAGGGAGGGAGAAAAAGGGGAGGACGGGGAGGAGAAG	GAAAAGAGGGGGGGAAGGAGAAAGAGGGGAAGGGAGGGGCGAGGAGGAGCAG	hap_03	hap_r29	AG	3	1	TC	CT	SINE/SINE
discovery	roan	dog_1551	GAAAAAAAGGAGGGGGGGGGAGAACGAAAAAGGGGAGAAGGGGGAGGAGCAG	ATAAAAAAGGAGGGGAAGGGAGGGAGAAAAAGGGAAGAAGGGGGAGGAACAA	hap_c208	hap_02	AG	3	NA	TC	NA	SINE/SINE
discovery	roan	dog_1552	ATAAAAAAGGAGGGGAAGGGAGGGAGAAAAAGGGAAGAAGGGAGAGGAAAAG	ATAAAAAAGGAGGGGAAGGGAGGGAGAAAAAGGGAAGAAGGGAGAGGAACAA	hap_04	hap_01	AA	4	NA	TT	NA	SINE/SINE
discovery	roan	dog_1555	ATAAAAAAGGAGGGGAAGGGAGGGAGAAAAAGGGAAGAAGGGGGAGGAACAA	ATAAAAAAGGAGGGGAAGGGAGGGAGAAAAAGGGAAGAAGGGGGAGGAACAA	hap_02	hap_02	AA	4	NA	TT	NA	SINE/SINE
discovery	roan	dog_1557	ATAAAAAAGGAGGGGAAGGGAGGGAGAAAAAGGGGAGGACGGGGAGGAGAAG	ATAAAAAAGGAGGGGAAGGGAGGGAGAAAAAGGGAAGAAGGGGGAGGAACAA	hap_03	hap_02	AA	4	NA	TT	NA	SINE/SINE
discovery	roan	dog_1566	GAAAAAAAGGAGGGGAAGGGAGGGAGAAAAAGGGAAGAAGGGAGAGGAACAA	GAAAAAAAGGAGGGGAAGGGAGGGAGAAAAAGGGAAGAAGGGAGAGGAACAA	hap_06	hap_06	AA	4	NA	TT	NA	SINE/SINE
discovery	roan	dog_1567	ATAAAAAAGGAGGGGAAGGGAGGGAGAAAAAGGGAAGAAGGGGGAGGAACAA	ATAAAAAAGGAGGGGAAGGGAGGGAGAAAAAGGGAAGAAGGGAGAGGAACAA	hap_02	hap_01	AA	4	NA	TT	NA	SINE/SINE
discovery	roan	dog_1570	ATAAAAAAGGAGGGGAAGGGAGGGAGAAAAAGGGGAGGACGGGGAGGAGAAG	ATAAAAAAGGAGGGGAAGGGAGGGAGAAAAAGGGAAGAAGGGGGAGGAACAA	hap_03	hap_02	AA	4	NA	TT	NA	SINE/SINE
discovery	roan	dog_1571	ATAAAAAAGGAGGGGAAGGGAGGGAGAAAAAGGGGAGGACGGGGAGGAGAAG	ATAAAAAAGGAGGGGAAGGGAGGGAGAAAAAGGGAAGAAGGGGGAGGAACAA	hap_03	hap_02	AA	4	NA	TT	NA	SINE/SINE
discovery	roan	dog_1575	ATAAAAAAGGAGGGGAAGGGAGGGAGAAAAAGGGGAGGACGGGGAGGAGAAG	GAAAAAGAGAGAGGGGGGAAAGAGAGAAAAAGGGAAGAAGGGAGAGGAACAA	hap_03	hap_GG01	AG	4	NA	TT	NA	SINE/SINE
discovery	roan	dog_1577	GAAAAAAAGGGGGGGGGGAGGGGGAGGGGAAGAAGAGAAGAAGAAGGAGCAG	ATAAAAAAGGAGGGGAAGGGAGGGAGAAAAAGGGAAGAAGGGAGAGGAACAA	hap_c01	hap_01	AG	3	NA	TC	NA	SINE/-
discovery	roan	dog_1578	ATAAAAAAGGAGGGGAAGGGAGGGAGAAAAAGGGAAGAAGGGGGAGGAACAA	ATAAAAAAGGAGGGGAAGGGAGGGAGAAAAAGGGAAGAAGGGGGAGGAACAA	hap_02	hap_02	AA	4	NA	TT	NA	SINE/SINE
discovery	roan	dog_1581	ATAAAAAAGGAGGGGAAGGGAGGGAGAAAAAGGGGAGGACGGGGAGGAGAAG	ATAAAAAAGGAGGGGAAGGGAGGGAGAAAAAGGGAAGAAGGGGGAGGAACAA	hap_03	hap_02	AA	4	NA	TT	NA	SINE/SINE
discovery	roan	dog_1590	ATAAAAAAGGAGGGGAAGGGAGGGAGAAAAAGGGAAGAAGGGAGAGGAAAAG	GAAAAAAAGGAGGGGGGGAGGGGGAGGAGCAGGGGAGAAGAGGGAGGAACAG	hap_04	hap_c211	AG	3	NA	TC	NA	SINE/SINE
discovery	roan	dog_1592	GAAAAAGAGAGAGGGGGGAAAGAGAGAAAAAGGGAAGAAGGGAGAGGAACAA	GAAAAAGAGAGAGGGGGGAAAGAGAGAAAAAGGGAAGAAGGGAGAGGAACAA	hap_GG01	hap_GG01	GG	4	1	TT	TT	SINE/SINE
discovery	roan	dog_1596	ATAAAAAAGGAGGGGAAGGGAGGGAGAAAAAGGGGAGGACGGGGAGGAGAAG	ATAAAAAAGGAGGGGAAGGGAGGGAGAAAAAGGGGAGGACGGGGAGGAGAAG	hap_03	hap_03	AA	4	NA	TT	NA	SINE/SINE
discovery	roan	dog_1607	ATAAAAAAGGAGGGGAAGGGAGGGAGAAAAAGGGAAGAAGGGAGAGGAACAA	ATAAAAAAGGAGGGGAAGGGAGGGAGAAAAAGGGAAGAAGGGAGAGGAACAA	hap_01	hap_01	AA	4	NA	TT	NA	SINE/SINE
discovery	roan	dog_1613	ATAAAAAAGGAGGGGAAGGGAGGGAGAAAAAGGGAGGGGCGAGAAGGAGCGG	ATAAAAAAGGAGGGGAAGGGAGGGAGAAAAAGGGAAGAAGGGAGAGGAACAA	hap_05	hap_01	AA	4	NA	TT	NA	SINE/SINE
discovery	roan	dog_1617	ATAAAAAAGGAGGGGAAGGGAGGGAGAAAAAGGGGAGGACGGGGAGGAGAAG	ATAAAAAAGGAGGGGAAGGGAGGGAGAAAAAGGGGAGGACGGGGAGGAGAAG	hap_03	hap_03	AA	4	NA	TT	NA	SINE/SINE
discovery	roan	dog_1632	ATAAAAAAGGAGGGGAAGGGAGGGAGAAAAAGGGGAGGACGGGGAGGAGAAG	ATAAAAAAGGAGGGGAAGGGAGGGAGAAAAAGGGAAGAAGGGGGAGGAACAA	hap_03	hap_02	AA	4	NA	TT	NA	SINE/SINE
discovery	roan	dog_1649	ATAAAAAAGGAGGGGAAGGGAGGGAGAAAAAGGGAAGAAGGGGGAGGAACAA	GAAAAAGAGAGAGGGGGGAAAGAGAGAAAAAGGGAAGAAGGGAGAGGAACAA	hap_02	hap_GG01	AG	4	NA	TT	NA	SINE/SINE
discovery	roan	dog_1652	ATAAAAAAGGAGGGGAAGGGAGGGAGAAAAAGGGAAGGACGGGGAGGAGAAG	ATAAAAAAGGAGGGGAAGGGAGGGAGAAAAAGGGAAGAAGGGGGAGGAACAA	hap_10	hap_02	AA	4	NA	TT	NA	SINE/SINE
discovery	roan	dog_1655	ATAAAAAAGGAGGGGAAGGGAGGGAGAAAAAGGGAAGAAGGGGGAGGAACAA	GAAAAAGAGAGAGGGGGGAAAGAGAGAAAAAGGGAAGAAGGGAGAGGAACAA	hap_02	hap_GG01	AG	4	1	TT	TT	SINE/SINE
discovery	roan	dog_1657	ATAAAAAAGGAGGGGAAGGGAGGGAGAAAAAGGGAAGAAGGGAGAGGAACAA	ATAAAAAAGGAGGGGAAGGGAGGGAGAAAAAGGGAAGAAGGGAGAGGAACAA	hap_01	hap_01	AA	4	NA	TT	NA	SINE/SINE
discovery	roan	dog_1665	ATAAAAAAGGAGGGGAAGGGAGGGAGAAAAAGGGAAGAAGGGAGAGGAACAA	ATAAAAAAGGAGGGGAAGGGAGGGAGAAAAAGGGGAGGACGGGGAGGAGAAG	hap_01	hap_03	AA	4	NA	TT	NA	SINE/-
discovery	roan	dog_1669	ATAAAAAAGGAGGGGAAGGGAGGGAGAAAAAGGGAAGAAGGGAGAGGAACAA	ATAAAAAAGGAGGGGGGGGGAGAACGAAGCAAGGAGGGGCGAGAAGGAGCGG	hap_01	hap_r54	AG	3	NA	TC	NA	SINE/SINE
discovery	roan	dog_1672	ATAAAAAAGGAGGGGAAGGGAGGGAGAAAAAGGGAAGAAGGGAGAGGAACAA	ATAAAAAAGGAGGGGAAGGGAGGGAGAAAAAGGGAAGAAGGGAGAGGAACAA	hap_01	hap_01	AA	4	NA	TT	NA	SINE/SINE
discovery	roan	dog_1675	GAAAAAGAGAGAGGGGGGAAAGAGAGAAAAAGGGAAGAAGGGAGAGGAACAA	ATAAAAAAGGAGGGGAAGGGAGGGAGAAAAAGGGGAGGACGGGGAGGAGAAG	hap_GG01	hap_03	AG	4	NA	TT	NA	SINE/SINE
discovery	roan	dog_1680	ATAAAAAAGGAGGGGAAGGGAGGGAGAAAAAGGGGAGGACGGGGAGGAGAAG	ATAAAAAAGGAGGGGAAGGGAGGGAGAAAAAGGGGAGGACGGGGAGGAGAAG	hap_03	hap_03	AA	4	NA	TT	NA	SINE/SINE
discovery	roan	dog_1683	ATAAAAAAGGAGGGGAAGGGAGGGAGAAAAAGGGAAGAAGGGAGAGGAACAA	ATAAAAAAGGAGGGGAAGGGAGGGAGAAAAAGGGAAGAAGGGGGAGGAACAA	hap_01	hap_02	AA	4	NA	TT	NA	SINE/SINE
discovery	roan	dog_1684	GAAAAAGAGAGAGGGGGGAAAGAGAGAAAAAGGGAAGAAGGGAGAGGAACAA	ATGAAAGAGAGAGGGGGGGGGGGGAGGAAAGGGAGAGAAGAGGGAGGAGCGG	hap_GG01	hap_c03	GG	3	NA	TC	NA	SINE/SINE
discovery	roan	dog_1685	GAAAAAGAGAGAGGGGGGAAAGAGAGAAAAAGGGAAGAAGGGGGAGGAGAAG	ATAAAAAAGGAGGGGAAGGGAGGGAGAAAAAGGGAAGAAGGGAGAGGAACAA	hap_r04	hap_01	AG	3	NA	TT	NA	SINE/-
discovery	roan	dog_1691	ATAAAAAAGGAGGGGAAGGGAGGGAGAAAAAGGGAAGAAGGGAGAGGAACAA	GAAAAAGAGAGAGGGGGGAAAGAGAGAAAAAGGGAAGGACGGGGAGGAGAAG	hap_01	hap_r36	AG	3	NA	TT	NA	SINE/SINE
discovery	roan	dog_1693	ATAAAAAAGGAGGGGAAGGGAGGGAGAAAAAGGGAAGAAGGGAGAGGAAAAG	ATAAAAAAGGAGGGGAAGGGAGGGAGAAAAAGGGGAGGACGGGGAGGAGAAG	hap_04	hap_03	AA	4	1	TT	TT	SINE/SINE
discovery	roan	dog_1694	ATAAAAAAGGAGGGGAAGGGAGGGAGAAAAAGGGAAGAAGGGGGAGGAACAA	ATAAAAAAGGAGGGGAAGGGAGGGAGAAAAAGGGGAGGACGGGGAGGAGAAG	hap_02	hap_03	AA	4	1	TT	TT	SINE/SINE
discovery	roan	dog_1698	ATAAAAAAGGAGGGGAAGGGAGGGAGAAAAAGGGGAGGACGGGGAGGAGAAG	ATAAAAAAGGAGGGGAAGGGAGGGAGAAAAAGGGGAGGACGGGGAGGAGAAG	hap_03	hap_03	AA	4	NA	TT	NA	SINE/SINE
discovery	roan	dog_1699	GAAAAAGAGAGAGGGGGGAAAGAGAGAAAAAGGGAAGAAGGGAGAGGAACAA	ATAAAAAAGGAGGGGAAGGGAGGGAGAAAAAGGGGAGGACGGGGAGGAGAAG	hap_GG01	hap_03	AG	4	NA	TT	NA	SINE/SINE
discovery	roan	dog_1704	ATAAAAAAGGAGGGGAAGGGAGGGAGAAAAAGGGGAGGACGGGGAGGAGAAG	ATAAAAAAGGAGGGGAAGGGAGGGAGAAAAAGGGAAGAAGGGGGAGGAACAA	hap_03	hap_02	AA	4	NA	TT	NA	SINE/SINE
discovery	roan	dog_1708	ATAAAAAAGGAGGGGAAGGGAGGGAGAAAAAGGGAAGAAGGGAGAGGAACAA	ATAAAAAAGGAGGGGAAGGGAGGGAGAAAAAGGGAAGAAGGGAGAGGAACAA	hap_01	hap_01	AA	4	NA	TT	NA	SINE/SINE
discovery	roan	dog_1709	ATAAAAAAGGAGGGGAAGGGAGGGAGAAAAAGGGAAGAAGGGAGAGGAACAA	ATAAAAAAGGAGGGGAAGGGAGGGAGAAAAAGGGAAGAAGGGAGAGGAACAA	hap_01	hap_01	AA	4	NA	TT	NA	SINE/SINE
discovery	roan	dog_1722	ATAAAAAAGGAGGGGAAGGGAGGGAGAAAAAGGGAAGAAGGGGGAGGAACAA	ATAAAAAAGGAGGGGAAGGGAGGGAGAAAAAGGGGAGGACGGGGAGGAGAAG	hap_02	hap_03	AA	4	NA	TT	NA	SINE/-
discovery	roan	dog_1724	ATAAAAAAGGAGGGGAAGGGAGGGAGAAAAAGGGAAGAAGGGGGAGGAACAA	GAGAAAGAGAGGAGGGGAAAAGAGAGGGGAAGAAGAAAACGAGAAGGAGCAG	hap_02	hap_c73	AG	3	NA	TC	NA	SINE/SINE
discovery	roan	dog_1726	ATAAAAAAGGAGGGGAAGGGAGGGAGAAAAAGGGAAGAAGGGAGAGGAACAA	ATAAAAAAGGAGGGGAAGGGAGGGAGAAAAAGGGAAGAAGGGAGAGGAACAA	hap_01	hap_01	AA	4	NA	TT	NA	SINE/SINE
discovery	roan	dog_1727	ATAAAAAAGGAGGGGAAGGGAGGGAGAAAAAGGGAAGAAGGGAGAGGAACAA	ATAAAAAAGGAGGGGAAGGGAGGGAGAAAAAGGGAAGAAGGGAGAGGAACAA	hap_01	hap_01	AA	4	NA	TT	NA	SINE/SINE
discovery	roan	dog_1730	ATAAAAAAGGAGGGGAAGGGAGGGAGAAAAAGGGAAGAAGGGAGAGGAACAA	GAAGGAAAGGAGGGGAGGGGAGGGAGGAAAAGGGGAGAAGAGGGAGGAGCAG	hap_01	hap_r25	AG	3	1	TC	NA	SINE/SINE
discovery	roan	dog_1734	GTAGGGAGGAAGAGAAGAAAGGGGAGGAGCAGGAGGAAAGAAGAAGGAACAG	ATAAAAAAGGAGGGGAAGGGAGGGAGAAAAAGGGGAGGACGGGGAGGAGAAG	hap_r14	hap_03	AG	3	NA	TC	NA	SINE/SINE
discovery	roan	dog_1735	GAAAAAAAGGAGGGGGGGGGAGGGCGAAGAAGGAGGGGAGGGGGAGGAGAAG	ATAAAAAAGGAGGGGAAGGGAGGGAGAAAAAGGGAAGAAGGGGGAGGAACAA	hap_c10	hap_02	AG	3	NA	TC	NA	SINE/SINE
discovery	roan	dog_1741	ATAAAAAAGGAGGGGAAGGGAGGGAGAAAAAGGGAAGAAGGGAGAGGAACAA	ATGAAAGAGAGAGGGGGGGGGGGGAGGAAAGGGAGAGAAGAGGGAGGAGCGG	hap_01	hap_c03	AG	3	1	TC	NA	SINE/SINE
discovery	roan	dog_1749	GAAAAAGAGAGAGGGGGGAAAGAGAGAAAAAGGGAAGAAGGGAGAGGAACAA	GAAAAAAAGAGGGGGGGGAGGGGGAGGGGAAGAAGAGAACGAGAAGGAGCGG	hap_GG01	hap_r44	GG	3	1	TC	CT	SINE/SINE
discovery	roan	dog_1750	GAAAAAGAGAGAGGGGGGAAAGAGAGAAAAAGGGAAGAAGGGAGAGGAACAA	ATAAAAAAGGAGGGGAAGGGAGGGAGAAAAAGGGGAGGACGGGGAGGAGAAG	hap_GG01	hap_03	AG	4	NA	TT	NA	SINE/SINE
discovery	roan	dog_1755	GAAAAAGAGAGAGGGGGGAAAGAGAGAAAAAGGGAAGAAGGGAGAGGAACAA	ATAAAAAAGGAGGGGAAGGGAGGGAGAAAAAGGGAAGAAGGGAGAGGAACAA	hap_GG01	hap_01	AG	4	NA	TT	NA	SINE/SINE
discovery	roan	dog_1760	ATAAAAAAGGAGGGGAAGGGAGGGAGAAAAAGGGGAGGACGGGGAGGAGAAG	ATAAAAAAGGAGGGGAAGGGAGGGAGAAAAAGGGAAGAAGGGAGAGGAAAAG	hap_03	hap_04	AA	4	1	TT	TT	SINE/SINE
discovery	roan	dog_1762	ATAAAAAAGGAGGGGAAGGGAGGGAGAAAAAGGGAAGAAGGGGGAGGAACAA	ATAAAAAAGGAGGGGAAGGGAGGGAGAAAAAGGGGAGGACGGGGAGGAGAAG	hap_02	hap_03	AA	4	NA	TT	NA	SINE/SINE
discovery	roan	dog_1763	ATAAAAAAGGAGGGGAAGGGAGGGAGAAAAAGGGAAGAAGGGAGAGGAAAAG	ATAAAAAAGGAGGGGAAGGGAGGGAGAAAAAGGGAAGAAGGGAGAGGAACAA	hap_04	hap_01	AA	4	NA	TT	NA	SINE/SINE
discovery	roan	dog_1768	ATAAAAAAGGAGGGGAAGGGAGGGAGAAAAAGGGGAGGACGGGGAGGAGAAG	GAAAAAGAGAGAGGGGGGAAAGAGAGGAGAAGGGGAAAAGGAGGAGGAGCAG	hap_03	hap_r34	AG	3	1	TC	CT	SINE/-
discovery	roan	dog_1769	ATAAAAAAGGAGGGGAAGGGAGGGAGAAAAAGGGAAGAAGGGGGAGGAACAA	ATAAAAAAGGAGGGGAAGGGAGGGAGAAAAAGGGAAGAAGGGGGAGGAACAA	hap_02	hap_02	AA	4	NA	TT	NA	SINE/SINE
discovery	roan	dog_1770	ATAAAAAAGGAGGGGAAGGGAGGGAGAAAAAGGGAAGAAGGGGGAGGAACAA	ATAAAAAAGGAGGGGAAGGGAGGGAGAAAAAGGGAAGAAGGGGGAGGAACAA	hap_02	hap_02	AA	4	NA	TT	NA	SINE/SINE
discovery	roan	dog_1772	GAAGGGGAGGGGAGAAGGGGAGAGAGGAAAAGGGGAGAAGAGGGAGGAGCAG	GAAAAAAAGGAGGGGGGGGGAGGGAGGAAAAGGAGGGAAGGAGGAGGCACAA	hap_r24	hap_GG02	GG	3	1	TC	CT	SINE/SINE
discovery	roan	dog_1774	GAAAAAGAGAGAGGGGGGAGGGGGCGAAGAAGGAGGGGAGGGGGAGGAGAAG	GAAAAAGAGAGAGGGGGGAAAGAGAGAAAAAGGGAAGAAGGGGGAGGAACAA	hap_r32	hap_r05	GG	3	NA	TC	NA	SINE/SINE
discovery	roan	dog_1779	ATAAAAAAGGAGGGGAAGGGAGGGAGAAAAAGGGAAGAAGGGGGAGGAACAA	ATAAAAAAGGAGGGGAAGGGAGGGAGAAAAAGGGAAGAAGGGGGAGGAACAA	hap_02	hap_02	AA	4	NA	TT	NA	SINE/SINE
discovery	roan	dog_1785	ATAAAAAAGGAGGGGAAGGGAGGGAGAAAAAGGGGAGGACGGGGAGGAGAAG	ATAAAAAAGGAGGGGAAGGGAGGGAGAAAAAGGGAAGAAGGGGGAGGAACAA	hap_03	hap_02	AA	4	NA	TT	NA	SINE/SINE
discovery	roan	dog_1787	ATAAAAAAGGAGGGGAAGGGAGGGAGAAAAAGGGAAGAAGGGGGAGGAGAAG	ATAAAAAAGGAGGGGAAGGGAGGGAGAAAAAGGGGAGGACGGGGAGGAGAAG	hap_15	hap_03	AA	4	NA	TT	NA	SINE/SINE
discovery	roan	dog_1788	GAAGAGAGAAGGGGGGGGGGAGAGAGGAGAAGGGGAGAACGAGAAGGAGCGG	ATAAAAAAGGAGGGGAAGGGAGGGAGAAAAAGGGAAGAAGGGAGAGGAACAA	hap_r01	hap_01	AG	3	NA	TC	NA	SINE/SINE
discovery	roan	dog_1791	GAAAAAGAGAGAGGGGGGAAAGAGAGAAAAAGGGAAGAAGGGAGAGGAACAA	ATAAAAAAGGAGGGGAAGGGAGGGAGAAAAAGGGAAGAAGGGAGAGGAAAAG	hap_GG01	hap_04	AG	4	NA	TT	NA	SINE/SINE
discovery	roan	dog_1795	ATAAAAAAGGAGGGGAAGGGAGGGAGAAAAAGGGAAGAAGGGGGAGGAACAA	ATAAAAAAGGAGGGGAAGGGAGGGAGAAAAAGGGAAGAAGGGGGAGGAACAA	hap_02	hap_02	AA	4	NA	TT	NA	SINE/SINE
discovery	roan	dog_1801	ATAAAAAAGGAGGGGAAGGGAGGGAGAAAAAGGGAAGAAGGGAGAGGAAAAG	GAAAAAGAGAGAGGGGGGAAAGAGAGAAAAAGGGAAGAAGGGAGAGGAACAA	hap_04	hap_GG01	AG	4	NA	TT	NA	SINE/SINE
discovery	roan	dog_1802	ATAAAAAAGGAGGGGAAGGGAGGGAGAAAAAGGGAAGAAGGGAGAGGAACAA	ATAAAAAAGGAGGGGAAGGGAGGGAGAAAAAGGGAAGAAGGGAGAGGAACAA	hap_01	hap_01	AA	4	NA	TT	NA	SINE/SINE
discovery	roan	dog_1809	ATAAAAAAGGAGGGGAAGGGAGGGAGAAAAAGGGGAGGACGGGGAGGAGAAG	ATAAAAAAGGAGGGGAAGGGAGGGAGAAAAAGGGGAGGACGGGGAGGAGAAG	hap_03	hap_03	AA	4	NA	TT	NA	SINE/SINE
discovery	roan	dog_1813	ATAAAAAAGGAGGGGAAGGGAGGGAGAAAAAGGGGAGGACGGGGAGGAGAAG	GAAAAAAAGGAGGGGGGGGGAGGACGAAAAAGGGGAGGACGGGGAGGAGAAG	hap_03	hap_r12	AG	3	1	TC	NA	SINE/SINE
discovery	roan	dog_1815	ATAAAAAAGGAGGGGAAGGGAGGGAGAAAAAGGGGAGGACGGGGAGGAGAAG	ATGAAAGAGAGAGGGGGGGGGGGGAGGAAAGGGAGAGAAGAGGGAGGAGCGG	hap_03	hap_c03	AG	3	NA	TC	NA	SINE/SINE
discovery	roan	dog_1816	ATAAAAAAGGAGGGGAAGGGAGGGAGAAAAAGGGAAGAAGGGAGAGGAAAAG	GAAAAAGAGAGAGGGGGGAAAGAGAGAAAAAGGGAAGAAGGGAGAGGAACAA	hap_04	hap_GG01	AG	4	NA	TT	NA	SINE/SINE
discovery	roan	dog_1820	ATGAAAGAGAGAGGGGGGGGGGGGAGGAAAGGGAGAGAAGAGGGAGGAGCGG	ATAAAAAAGGAGGGGAAGGGAGGGAGAAAAAGGGAAGAAGGGGGAGGAACAA	hap_c03	hap_02	AG	3	NA	TC	NA	SINE/SINE
discovery	roan	dog_1822	ATAAAAAAGGAGGGGAAGGGAGGGAGAAAAAGGGGAGGACGGGGAGGAGAAG	ATAAAAAAGGAGGGGAAGGGAGGGAGAAAAAGGGGAGGACGGGGAGGAGAAG	hap_03	hap_03	AA	4	NA	TT	NA	SINE/SINE
discovery	roan	dog_1827	GAAGAGAGAAGGGGGGGGGGAGAGAGGAGAAGGGGAGAACGAGAAGGAGCGG	ATAAAAAAGGAGGGGAAGGGAGGGAGAAAAAGGGAAGAAGGGAGAGGAACAA	hap_r01	hap_01	AG	3	NA	TC	NA	SINE/SINE
discovery	roan	dog_1829	ATAAAAAAGGAGGGGAAGGGAGGGAGAAAAAGGGAAGAAGGGAGAGGAAAAG	GAGAAAGAGAGAGGGGGGGGAGAACGAGGAAGGGGAAGAGAGGGAGGAACAG	hap_04	hap_r22	AG	3	NA	TC	NA	SINE/SINE
discovery	roan	dog_1831	ATAAAAAAGGAGGGGAAGGGAGGGAGAAAAAGGGGAGGACGGGGAGGAGAAG	ATAAAAAAGGAGGGGAAGGGAGGGAGAAAAAGGGGAGAAGGGGGAGGAACAA	hap_03	hap_14	AA	4	NA	TT	NA	SINE/-
discovery	roan	dog_1833	ATAAAAAAGGAGGGGAAGGGAGGGAGAAAAAGGGGAGGACGGGGAGGAGAAG	ATAAAAAAGGAGGGGAAGGGAGGGAGAAAAAGGGAAGAAGGGAGAGGAACAA	hap_03	hap_01	AA	4	NA	TT	NA	SINE/SINE
discovery	roan	dog_1834	ATAAAAAAGGAGGGGAAGGGAGGGAGAAAAAGGGAAGAAGGGGGAGGAACAG	ATAAAAAAGGAGGGGAAGGGAGGGAGAAAAAGGGAAGAAGGGAGAGGAAAAG	hap_09	hap_04	AA	4	NA	TT	NA	SINE/SINE
discovery	roan	dog_1852	ATAAAAAAGGAGGGGAAGGGAGGGAGAAAAAGGGAAGAAGGGGGAGGAACAA	GAAAAGAGGGGGGGGAGGAGAGAGAGGGGAAGAAAAGAAGAGGGAGGAGCGG	hap_02	hap_r28	AG	3	NA	TC	NA	SINE/SINE
discovery	roan	dog_1853	ATAGGGGAGGGGAGAAGAAAGGAAAGGAGAAGGAGAAAACGGGGAGGAAAAG	ATAAAAAAGGAGGGGAAGGGAGGGAGAAAAAGGGGAGGACGGGGAGGAGAAG	hap_c62	hap_03	AG	3	NA	TC	NA	SINE/SINE
discovery	roan	dog_1856	AAAGAGAGAAGGGAGAGGAGAGGGAGGGGAAGGAGGGGAGAGGAAGGAACGG	ATAAAAAAGGAGGGGAAGGGAGGGAGAAAAAGGGAAGAAGGGAGAGGAACAA	hap_r58	hap_01	AG	3	NA	TC	NA	SINE/-
discovery	roan	dog_1857	GTGAAAGAGAGAGGGGGGAGAAGGAGGAGAAGGAGGGGAGGGGGAGGAGCGG	ATAAAAAAGGAGGGGAAGGGAGGGAGAAAAAGGGAAGAAGGGGGAGGAACAA	hap_r06	hap_02	AG	3	NA	0	NA	SINE/SINE
discovery	roan	dog_1858	ATAAAAAAGGAGGGGAAGGGAGGGAGAAAAAGGGGAGGACGGGGAGGAGAAG	ATAAAAAAGGAGGGGAAGGGAGGGAGAAAAAGGGGAGGACGGGGAGGAGAAG	hap_03	hap_03	AA	4	NA	TT	NA	SINE/-
discovery	roan	dog_1859	ATAAAAAAGGAGGGGAAGGGAGGGAGAAAAAGGGAAGAAGGGAGAGGAAAAG	ATAAAAAAGGAGGGGAAGGGAGGGAGAAAAAGGGGAGGACGGGGAGGAGAAG	hap_04	hap_03	AA	4	NA	TT	NA	SINE/SINE
discovery	roan	dog_1862	ATAAAAAAGGAGGGGAAGGGAGGGAGAAAAAGGGGAGGACGGGGAGGAGAAG	ATAAAAAAGGAGGGGAAGGGAGGGAGAAAAAGGGAAGAAGGGAGAGGAACAA	hap_03	hap_01	AA	4	NA	TT	NA	SINE/SINE
discovery	roan	dog_1864	GAAGAGAAGAGAGGGGGAAAAGAGAGGAAAAGGAGAGAAGGGGGAGGCGAAA	ATAAAAAAGGAGGGGAAGGGAGGGAGAAAAAGGGAAGAAGGGAGAGGAAAAG	hap_r27	hap_04	AG	3	NA	TC	NA	SINE/SINE
discovery	roan	dog_1865	ATAAAAAAGGAGGGGAAGGGAGGGAGAAAAAGGGAAGAAGGGGGAGGAACAA	ATGAAAGAGAGAGGAAGGAGAAGGAGGAAAAGGGAGGGACGAGAAGGAGCAG	hap_02	hap_r47	AG	3	1	TC	NA	SINE/SINE
discovery	roan	dog_1868	GAGAAAGAGGGAGGGAGGGAGGAGAGAAAAAGGGAAGAAGGGAGAGGAACAA	ATAAAAAAGGAGGGGAAGGGAGGGAGAAAAAGGGAAGAAGGGAGAGGAACAA	hap_r02	hap_01	AG	3	NA	0	NA	SINE/SINE
discovery	roan	dog_1878	ATAAAAAAGGAGGGGAAGGGAGGGAGAAAAAGGGGAGGACGGGGAGGAGAAG	ATAAAAAAGGAGGGGAAGGGAGGGAGAAAAAGGGGAGGACGGGGAGGAGAAG	hap_03	hap_03	AA	4	NA	TT	NA	SINE/SINE
discovery	roan	dog_1886	ATAAAAAAGGAGGGGAAGGGAGGGAGAAAAAGGGAAGAAGGGAGAGGAACAG	ATAAAAAAGGAGGGGAAGGGAGGGAGAAAAAGGGAAGAAGGGAGAGGAACAA	hap_16	hap_01	AA	4	NA	TT	NA	SINE/SINE
discovery	roan	dog_1889	ATAAAAAAGGAGGGGAAGGGAGGGAGAAAAAGGGAAGAAGGGGGAGGAACAA	ATAAAAAAGGAGGGGAAGGGAGGGAGAAAAAGGGAAGAAGGGGGAGGAACAA	hap_02	hap_02	AA	4	NA	TT	NA	SINE/SINE
discovery	roan	dog_1891	ATAAAAAAGGAGGGGAAGGGAGGGAGAAAAAGGGAAGAAGGGGGAGGAACAA	GAAAAAGAGAGAGGGGGGAAAGAGAGAAAAAGGGAAGAAGGGAGAGGAACAA	hap_02	hap_GG01	AG	4	NA	TT	NA	SINE/SINE
discovery	roan	dog_1892	GAGAAAGAGAGAGGGGGGGGAGGGCGAAGAAGGAGGGGAGGGGGAGGAGAAG	ATAAAAAAGGAGGGGAAGGGAGGGAGAAAAAGGGAAGAACGGGGAGGAGAAG	hap_c130	hap_18	AG	3	NA	TC	NA	SINE/SINE
discovery	roan	dog_1895	ATAAAAAAGGAGGGGAAGGGAGGGAGAAAAAGGGAAGAAGGGAGAGGAACAA	GAAGGGGAGGGGAGGAAGGGAGGGAGAAAAAGGGAAGAAGGGAGAGGAACAA	hap_01	hap_07	AA	4	1	TT	NA	SINE/SINE
discovery	roan	dog_1900	ATAAAAAAGGAGGGGAAGGGAGGGAGAAAAAGGGAAGAAGGGGGAGGAACAA	ATAAAAAAGGAGGGGAAGGGAGGGAGAAAAAGGGAAGAAGGGGGAGGAACAA	hap_02	hap_02	AA	4	NA	TT	NA	SINE/SINE
discovery	roan	dog_1901	ATAAAAAAGGAGGGGAAGGGAGGGAGAAAAAGGGAAGAAGGGAGAGGAACAA	ATAAAAAAGGAGGGGAAGGGAGGGAGAAAAAGGGAAGAAGGGAGAGGAACAA	hap_01	hap_01	AA	4	NA	TT	NA	SINE/SINE
discovery	roan	dog_1903	ATAAAAAAGGAGGGGAAGGGAGGGAGAAAAAGGGAAGAAGGGAGAGGAACAA	GAAAAGAGGGGGGAGAGGAGGGAGAGGGGAAGGGAAGAAGGGAGAGGAACAA	hap_01	hap_r30	AG	3	NA	TC	NA	SINE/SINE
discovery	roan	dog_1906	ATAAAAAAGGAGGGGAAGGGAGGGAGAAAAAGGGGAGGACGGGGAGGAGAAG	ATAAAAAAGGAGGGGAAGGGAGGGAGAAAAAGGGGAGGACGGGGAGGAGAAG	hap_03	hap_03	AA	4	NA	TT	NA	SINE/SINE
discovery	roan	dog_1907	ATAAAAAAGGAGGGGAAGGGAGGGAGAAAAAGGGAAGAAGGGAGAGGAACAA	ATAAAAAAGGAGGGGAAGGGAGGGAGAAAAAGGGAAGAAGGGAGAGGAACAA	hap_01	hap_01	AA	4	NA	TT	NA	SINE/SINE
discovery	roan	dog_1908	ATAAAAAAGGAGGGGAAGGGAGGGAGAAAAAGGAGGGGAGGGGGAGGAGAAG	ATAGGGGAGGGAGGGGGGGGAGAAAGGGGAAGGAGGGGACGGGGAGGAGCGG	hap_19	hap_r50	AG	3	1	TC	NA	SINE/SINE
discovery	roan	dog_1911	ATAAAAAAGGAGGGGAAGGGAGGGAGAAAAAGGGAAGAAGGGGGAGGAACAA	ATAAAAAAGGAGGGGAAGGGAGGGAGAAAAAGGGGAGGACGGGGAGGAGAAG	hap_02	hap_03	AA	4	NA	TT	NA	SINE/SINE
discovery	roan	dog_1912	ATAAAAAAGGAGGGGAAGGGAGGGAGAAAAAGGGAAGAAGGGGGAGGAACAA	ATAAAAAAGGAGGGGAAGGGAGGGAGAAAAAGGGAAGAAGGGGGAGGAACAA	hap_02	hap_02	AA	4	NA	TT	NA	SINE/SINE
discovery	roan	dog_1913	ATAAAAAAGGAGGGGAAGGGAGGGAGAAAAAGGGGAGGACGGGGAGGAGAAG	ATAAAAAAGGAGGGGAAGGGAGGGAGAAAAAGGGGAGGACGGGGAGGAGAAG	hap_03	hap_03	AA	4	NA	TT	NA	SINE/SINE
discovery	roan	dog_1916	ATAAAAAAGGAGGGGAAGGGAGGGAGAAAAAGGGAAGAAGGGGGAGGAACAA	ATAAAAAAGGAGGGGAAGGGAGGGAGAAAAAGGGGAGGACGGGGAGGAGAAG	hap_02	hap_03	AA	4	NA	TT	NA	SINE/SINE
discovery	roan	dog_1918	ATAAAAAAGGAGGGGAAGGGAGGGAGAAAAAGGGGAGGACGGGGAGGAGAAG	ATAAAAAAGGAGGGGAAGGGAGGGAGAAAAAGGGAAGAAGGGGGAGGAACAA	hap_03	hap_02	AA	4	NA	TT	NA	SINE/SINE
discovery	roan	dog_1919	ATAAAAAAGGAGGGGAAGGGAGGGAGAAAAAGGGAAGAAGGGAGAGGAACAA	ATAAAAAAGGAGGGGAAGGGAGGGAGAAAAAGGGGAGGACGGGGAGGAGAAG	hap_01	hap_03	AA	4	NA	TT	NA	SINE/SINE
discovery	roan	dog_1920	ATAAAAAAGGAGGGGAAGGGAGGGAGAAAAAGGGAAGAAGGGAGAGGAACAA	GAGAAAGAGAGAGGGGGGGGAGAGAGGGGCAGGAGAGAAGAAGAGAAAACAA	hap_01	hap_r03	AG	3	1	TC	NA	SINE/SINE
discovery	roan	dog_1923	ATAAAAAAGGAGGGGAAGGGAGGGAGAAAAAGGGAAGAAGGGAGAGGAACAA	GAAAAAGAGAGAGGGGGGAAAGAGAGAAAAAGGGAAGAAGGGAGAGGAACAA	hap_01	hap_GG01	AG	4	NA	TT	NA	SINE/-
discovery	roan	dog_1925	ATAAAAAAGGAGGGGAAGGGAGGGAGAAAAAGGGAAGAAGGGAGAGGAACAA	ATAAAAAAGGAGGGGAAGGGAGGGAGAAAAAGGGAAGAAGGGAGAGGAACAA	hap_01	hap_01	AA	4	NA	TT	NA	SINE/SINE
discovery	roan	dog_1930	ATAAAAAAGGAGGGGAAGGGAGGGAGAAAAAGGGGAGGACGGGGAGGAGAAG	ATAAAAAAGGAGGGGAAGGGAGGGAGAAAAAGGGGAGGACGGGGAGGAGAAG	hap_03	hap_03	AA	4	NA	TT	NA	SINE/-
discovery	roan	dog_1933	ATAAAAAAGGAGGGGAAGGGAGGGAGAAAAAGGGAAGAAGGGGGAGGAACAA	ATAGAAGAGAGGGGGGGGAGGGGGAGGAGAAGAGAAGAAGGGAGAGGAACAA	hap_02	hap_r51	AG	3	NA	TC	NA	SINE/SINE
discovery	roan	dog_1935	ATAAAAAAGGAGGGGAAGGGAGGGAGAAAAAGGGGAGGACGGGGAGGAGAAG	GAAAAAGAGAGAGGGGGGAAAGAGAGAAAAAGGGAAGAAGGGGGAGGAACAA	hap_03	hap_r05	AG	4	NA	TT	NA	SINE/SINE
discovery	roan	dog_1941	ATAAAAAAGGAGGGGAAGGGAGGGAGAAAAAGGGAAGAAGGGAGAGGAACAA	GAAAAAAAGGAGGGGAAGGGAGGGAGAAAAAGGGAAGAAGGGAGAGGAACAA	hap_01	hap_06	AA	4	NA	TT	NA	SINE/SINE
discovery	roan	dog_1952	ATAAAAAAGGAGGGGAAGGGAGGGAGAAAAAGGGAAGAAGGGGGAGGAACAA	ATGAAAGAGAGAGGGGGGGGGGGGAGGAAAGGGAGAGAAGAGGGAGGAGCGG	hap_02	hap_c03	AG	3	NA	TC	NA	SINE/SINE
discovery	roan	dog_1955	ATAAAAAAGGAGGGGAAGGGAGGGAGAAAAAGGGGAGGACGGGGAGGAACAA	ATAAAAAAGGAGGGGAAGGGAGGGAGAAAAAGGGGAGGACGGGGAGGAGAAG	hap_08	hap_03	AA	4	NA	TT	NA	SINE/SINE
discovery	roan	dog_1956	ATAAAAAAGGAGGGGAAGGGAGGGAGAAAAAGGGAAGAAGGGGGAGGAACAG	ATAAAAAAGGAGGGGAAGGGAGGGAGAAAAAGGGAAGAAGGGGGAGGAACAA	hap_09	hap_02	AA	4	NA	TT	NA	SINE/SINE
discovery	roan	dog_1957	ATAAAAAAGGAGGGGAAGGGAGGGAGAAAAAGGGAAGAAGGGGGAGGAACAA	ATAAAAAAGGAGGGGAAGGGAGGGAGAAAAAGGGAAGAAGGGAGAGGAACAA	hap_02	hap_01	AA	4	NA	TT	NA	SINE/-
discovery	roan	dog_1958	GAAAAAGAGAGAGGGGGGAAAGAGAGAAAAAGGGAAGAAGGGAGAGGAACAA	ATAAAAAAGGAGGGGAAGGGAGGGAGAAAAAGGGAAGAAGGGAGAGGAAAAG	hap_GG01	hap_04	AG	4	NA	TT	NA	SINE/SINE
discovery	roan	dog_1963	ATAAAAAAGGAGGGGAAGGGAGGGAGAAAAAGGGAAGAAGGGGGAGGAACAA	ATAAAAAAGGAGGGGAAGGGAGGGAGAAAAAGGGAAGAAGGGGGAGGAACAA	hap_02	hap_02	AA	4	NA	TT	NA	SINE/SINE
discovery	roan	dog_1968	ATAAAAAAGGAGGGGAAGGGAGGGAGAAAAAGGGAAGAAGGGGGAGGAACAA	ATAAAAAAGGAGGGGAAGGGAGGGAGAAAAAGGGGAGGACGGGGAGGAGAAG	hap_02	hap_03	AA	4	1	TT	NA	SINE/SINE
discovery	roan	dog_1970	ATAAAAAAGGAGGGGAAGGGAGGGAGAAAAAGGGAAGAAGGGGGAGGAACAA	ATAAAAAAGGAGGGGAAGGGAGGGAGAAAAAGGGAAGAAGGGGGAGGAACAA	hap_02	hap_02	AA	4	NA	TT	NA	SINE/SINE
discovery	roan	dog_1974	ATAAAAAAGGAGGGGAAGGGAGGGAGAAAAAGGGAAGAAGGGGGAGGAACAA	GAAAAAAAGGGGGGGGGGAGGGGGAGGGGAAGAAGAGAAGAAGAAGGAGCAG	hap_02	hap_c01	AG	3	1	TC	NA	SINE/SINE
discovery	roan	dog_1978	ATAAAAAAGGAGGGGAAGGGAGGGAGAAAAAGGGAAGAAGGGGGAGGAACAA	ATAAAAAAGGAGGGGAAGGGAGGGAGAAAAAGGGAAGAAGGGGGAGGAACAA	hap_02	hap_02	AA	4	NA	TT	NA	SINE/SINE
discovery	roan	dog_1979	GAAGGGGAGGGGAGGAAGGGAGGGAGAAAAAGGGAAGAAGGGAGAGGAACAA	GAAGGGGAGGGGAGGAAGGGAGGGAGAAAAAGGGAAGAAGGGAGAGGAACAA	hap_07	hap_07	AA	4	1	TT	NA	SINE/SINE
discovery	roan	dog_1981	GAAAAAGAGAGAGGGGGGAAAGAGAGAAAAAGGGAAGAAGGGGGAGGAGAAG	ATAAAAAAGGAGGGGAAGGGAGGGAGAAAAAGGGGAGGACGGGGAGGAGAAG	hap_r04	hap_03	AG	3	NA	TT	NA	SINE/SINE
discovery	roan	dog_1993	GAGAAAGAGGGAGGGAGGGAGGGGCGAAAAAAGGGAGAAGGGGGAGGCACAG	ATAAAAAAGGAGGGGAAGGGAGGGAGAAAAAGGGAAGAAGGGGGAGGAACAA	hap_r18	hap_02	AG	3	NA	TC	NA	SINE/SINE
discovery	roan	dog_1995	ATAAAAAAGGAGGGGAAGGGAGGGAGAAAAAGGGGAGGACGGGGAGGAGAAG	ATAAAAAAGGAGGGGAAGGGAGGGAGAAAAAGGGGAGGACGGGGAGGAGAAG	hap_03	hap_03	AA	4	NA	TT	NA	SINE/SINE
discovery	roan	dog_1997	ATAAAAAAGGAGGGGAAGGGAGGGAGAAAAAGGGAAGAAGGGGGAGGAACAA	ATAAAAAAGGAGGGGAAGGGAGGGAGAAAAAGGGAAGAAGGGGGAGGAACAA	hap_02	hap_02	AA	4	NA	TT	NA	SINE/SINE
discovery	roan	dog_2013	GAAGAGAGAAGGGGGGGGGGAGAGAGGAGAAGGGGAGAACGAGAAGGAGCGG	ATAAAAAAGGAGGGGAAGGGAGGGAGAAAAAGGGAAGAAGGGAGAGGAACAA	hap_r01	hap_01	AG	3	NA	TC	NA	SINE/SINE
discovery	roan	dog_2014	ATAAAAAAGGAGGGGAAGGGAGGGAGAAAAAGGGAAGAAGGGAGAGGAACAA	ATAAAAAAGGAGGGGAAGGGAGGGAGAAAAAGGGAAGAAGGGAGAGGAACAA	hap_01	hap_01	AA	4	NA	TT	NA	SINE/SINE
discovery	roan	dog_2016	ATAAAAAAGGAGGGGAAGGGAGGGAGAAAAAGGGAAGAAGGGAGAGGAAAAG	ATAAAAAAGGAGGGGAAGGGAGGGAGAAAAAGGGGAGGACGGGGAGGAGAAG	hap_04	hap_03	AA	4	NA	TT	NA	SINE/SINE
discovery	roan	dog_2019	GAGAAAGAGAGGGGGAGAGGAGGGAGGGGAAGGGGAGAAGAGGGAGGAGCGG	ATAAAAAAGGAGGGGAAGGGAGGGAGAAAAAGGGAAGAAGGGGGAGGAACAA	hap_r20	hap_02	AG	3	NA	TC	NA	SINE/SINE
discovery	roan	dog_2022	ATAAAAAAGGAGGGGAAGGGAGGGAGAAAAAGGGGAGGACGGGGAGGAGAAG	ATAAAAAAGGAGGGGAAGGGAGGGAGAAAAAGGGAAGAAGGGAGAGGAACAA	hap_03	hap_01	AA	4	NA	TT	NA	SINE/SINE
discovery	roan	dog_2023	ATAAAAAAGGAGGGGAAGGGAGGGAGAAAAAGGGGAGGACGGGGAGGAGAAG	ATAAAAAAGGAGGGGAAGGGAGGGAGAAAAAGGGAAGAAGGGGGAGGAACAA	hap_03	hap_02	AA	4	NA	TT	NA	SINE/SINE
discovery	roan	dog_2026	ATAAAAAAGGAGGGGAAGGGAGGGAGAAAAAGGGAAGAAGGGAGAGGAAAAG	ATAAAAAAGGAGGGGAAGGGAGGGAGAAAAAGGGGAGGACGGGGAGGAGAAG	hap_04	hap_03	AA	4	NA	TT	NA	SINE/SINE
discovery	roan	dog_2031	GAAAAAAAGGAGGGGGGGGGAGGGAGGAAAAGGAGGGAAGGAGGAGGCACAA	GAAAAAAAGGAGGGGGGGGGAGGGAGGAAAAGGAGGGAAGGAGGAGGCACAG	hap_GG02	hap_r38	GG	3	NA	TT	NA	SINE/-
discovery	roan	dog_2032	GAAAAAAAGGAGGGGAAGGGAGGGAGAAAAAGGGAAGAAGGGAGAGGAACAA	GAGAAAGAGAGAGGGGGGGGAAGGAGGGGAAAGGAAGAAGAGGGAGGAGCAG	hap_06	hap_c138	AG	3	1	TC	NA	SINE/SINE
discovery	roan	dog_2033	ATAAAAAAGGAGGGGAAGGGAGGGAGAAAAAGGGAAGAAGGGGGAGGAACAA	ATAAAAAAGGAGGGGAAGGGAGGGAGAAAAAGGGGAGGACGGGGAGGAGAAG	hap_02	hap_03	AA	4	NA	TT	NA	SINE/SINE
discovery	roan	dog_2041	ATAAAAAAGGAGGGGAAGGGAGGGAGAAAAAGGGAAGAAGGGGGAGGAACAA	ATAAAAAAGGAGGGGAAGGGAGGGAGAAAAAGGGGAGGACGGGGAGGAGAAG	hap_02	hap_03	AA	4	NA	TT	NA	SINE/-
discovery	roan	dog_2049	ATAAAAAAGGAGGGGAAGGGAGGGAGAAAAAGGGAAGAAGGGGGAGGAACAA	ATAAAAAAGGAGGGGAAGGGAGGGAGAAAAAGGGAAGAAGGGGGAGGAACAA	hap_02	hap_02	AA	4	NA	TT	NA	SINE/SINE
discovery	roan	dog_2052	ATGAAGAAGGGGAGAAGGAAAAAACAAGAAAGGGGAGGACGGGGAGGCGCGG	ATAAAAAAGGAGGGGAAGGGAGGGAGAAAAAGGGAAGAAGGGGGAGGAACAA	hap_r46	hap_02	AG	3	NA	TC	NA	SINE/SINE
discovery	roan	dog_2055	ATAAAAAAGGAGGGGAAGGGAGGGAGAAAAAGGGAAGAAGGGGGAGGAACAA	ATAAAAAAGGAGGGGAAGGGAGGGAGAAAAAGGGAAGAAGGGGGAGGAACAA	hap_02	hap_02	AA	4	NA	TT	NA	SINE/SINE
discovery	roan	dog_2056	ATAAAAAAGGAGGGGAAGGGAGGGAGAAAAAGGGAAGAAGGGAGAGGAACAA	ATAAAAAAGGAGGGGAAGGGAGGGAGAAAAAGGGAAGAAGGGAGAGGAACAA	hap_01	hap_01	AA	4	NA	TT	NA	SINE/SINE
discovery	roan	dog_2058	ATAAAAAAGGAGGGGAAGGGAGGGAGAAAAAGGGGAGGACGGGGAGGAGAAG	ATAAAAAAGGAGGGGAAGGGAGGGAGAAAAAGGGAAGAAGGGAGAGGAACAA	hap_03	hap_01	AA	4	NA	TT	NA	SINE/SINE
discovery	roan	dog_2063	AAAGGGGAGAGAAGGGGGGGAGGGAGGAAAAGGAGGGAAGGAGGAGGCACAA	GAAAAAGAGAGAGGGGGAAAAAGGAGGGGAAAGGAAGAAGAGGGAGGAGCGG	hap_r57	hap_c21	GG	3	NA	TC	NA	SINE/SINE
discovery	roan	dog_2067	ATAAAAAAGGAGGGGGGGGGAGAACGAAGCAAGGAGGGGCGGGGAGGAACAG	ATAAAAAAGGAGGGGAAGGGAGGGAGAAAAAGGGGAGGACGGGGAGGAGAAG	hap_c100	hap_03	AG	3	NA	TC	NA	SINE/SINE
discovery	roan	dog_2068	ATAAAAAAGGAGGGGAAGGGAGGGAGAAAAAGGGAAGAAGGGAGAGGAACAA	ATAAAAAAGGAGGGGAAGGGAGGGAGAAAAAGGGAAGAAGGGAGAGGAACAA	hap_01	hap_01	AA	4	NA	TT	NA	SINE/SINE
discovery	roan	dog_2075	ATAAAAAAGGAGGGGAAGGGAGGGAGAAAAAGGGAAGAAGGGGGAGGAACAA	ATAAAAAAGGAGGGGAAGGGAGGGAGAAAAAGGGAAGAAGGGGGAGGAACAA	hap_02	hap_02	AA	4	NA	TT	NA	SINE/SINE
discovery	roan	dog_2079	ATAAAAAAGGAGGGGAAGGGAGGGAGAAAAAGGGAAGAAGGGGGAGGAACAA	ATAAAAAAGGAGGGGAAGGGAGGGAGAAAAAGGGAAGAAGGGAGAGGAACAA	hap_02	hap_01	AA	4	NA	TT	NA	SINE/SINE
discovery	roan	dog_2080	ATAAAAAAGGAGGGGAAGGGAGGGAGAAAAAGGGAAGAAGGGAGAGGAAAAG	ATAAAAAAGGAGGGGAAGGGAGGGAGAAAAAGGGAAGAAGGGGGAGGAACAA	hap_04	hap_02	AA	4	NA	TT	NA	SINE/SINE
discovery	roan	dog_2096	GAAAAAGAGAGAGGGGGGAAAGAGAGAAAAAGGGAAGAAGGGGGAGGAACAA	ATAAAAAAGGAGGGGAAGGGAGGGAGAAAAAGGGGAGGACGGGGAGGAGAAG	hap_r05	hap_03	AG	4	NA	TT	NA	SINE/SINE
discovery	roan	dog_2098	ATAAAAAAGGAGGGGAAGGGAGGGAGAAAAAGGGGAGGACGGGGAGGAACAA	ATAAAAAAGGAGGGGAAGGGAGGGAGAAAAAGGGAAGAAGGGAGAGGAACAA	hap_08	hap_01	AA	4	NA	TT	NA	SINE/SINE
discovery	roan	dog_2099	GAAAAAGAGAGAGGGGGGAAAGAGAGAAAAAGGGAAGAAGGGAGAGGAACAA	ATAAAAAAGGAGGGGAAGGGAGGGAGAAAAAGGGGAGGACGGGGAGGAGAAG	hap_GG01	hap_03	AG	4	NA	TT	NA	-/-
discovery	roan	dog_2101	ATAAAAAAGGAGGGGAAGGGAGGGAGAAAAAGGGAAGAAGGGAGAGGAACAA	ATAAAAAAGGAGGGGAAGGGAGGGAGAAAAAGGGAAGAAGGGAGAGGAACAA	hap_01	hap_01	AA	4	NA	TT	NA	SINE/SINE
discovery	roan	dog_2126	ATAAAAAAGGAGGGGAAGGGAGGGAGAAAAAGGGGAGGACGGGGAGGAGAAG	ATAAAAAAGGAGGGGAAGGGAGGGAGAAAAAGGGAAGAAGGGAGAGGAACAA	hap_03	hap_01	AA	4	NA	TT	NA	SINE/SINE
discovery	roan	dog_2138	ATAAAAAAGGAGGGGAAGGGAGGGAGAAAAAGGGGAGGACGGGGAGGAGAAG	ATAAAAAAGGAGGGGAAGGGAGGGAGAAAAAGGGAAGAAGGGGGAGGAACAA	hap_03	hap_02	AA	4	NA	TT	NA	SINE/SINE
discovery	roan	dog_2140	GAGAAAGAGGGAGGGGGGAGGGGGAGGAGAAGAGGAGAAGAGGGAGGAGCAG	GAAAAAGAGAGAGGGGGGAAAGAGAGAAAAAGGGAAGAAGGGAGAGGAACAA	hap_r17	hap_GG01	GG	3	NA	TC	NA	SINE/SINE
discovery	roan	dog_2141	GAAAAAGAGAGAGGGGGGAAAGAGAGAAAAAGGGAAGAAGGGAGAGGAACAA	ATAAAAAAGGAGGGGAAGGGAGGGAGAAAAAGGGAAGAAGGGGGAGGAACAA	hap_GG01	hap_02	AG	4	NA	TT	NA	SINE/SINE
discovery	roan	dog_2142	ATAAAAAAGGAGGGGAAGGGAGGGAGAAAAAGGGGAGGACGGGGAGGAGAAG	ATAAAAAAGGAGGGGAAGGGAGGGAGAAAAAGGGAAGAAGGGGGAGGAACAA	hap_03	hap_02	AA	4	NA	TT	NA	SINE/SINE
discovery	roan	dog_2143	ATAAAAAAGGAGGGGAAGGGAGGGAGAAAAAGGGAAGAAGGGAGAGGAAAAG	ATAAAAAAGGAGGGGAAGGGAGGGAGAAAAAGGGAAGAAGGGGGAGGAACAA	hap_04	hap_02	AA	4	NA	TT	NA	SINE/SINE
discovery	roan	dog_2147	ATAAAAAAGGAGGGGAAGGGAGGGAGAAAAAGGGAAGAAGGGGGAGGAACAA	ATAAAAAAGGAGGGGAAGGGAGGGAGAAAAAGGGAAGAAGGGGGAGGAACAA	hap_02	hap_02	AA	4	NA	TT	NA	SINE/SINE
discovery	roan	dog_2148	GAGAAAGAGAGAGGGGGAAAAGAGAGGAAAAGGAGAGGGCGGGGAGGAGCAG	ATAAAAAAGGAGGGGAAGGGAGGGAGAAAAAGGGAAGAAGGGGGAGGAACAA	hap_c40	hap_02	AG	3	NA	TC	NA	SINE/SINE
discovery	roan	dog_2149	ATAAAAAAGGAGGGGAAGGGAGGGAGAAAAAGGGGAGGACGGGGAGGAGAAG	GAAAAAAAGGGGGGGGGGAGGGGGAGGGGAAGAAGAGAAGAAGAAGGAGCAG	hap_03	hap_c01	AG	3	NA	TC	NA	SINE/-
discovery	roan	dog_2152	ATAGGGGAGGGGAGAAGAAAGGAAAGGAGAAGGAGAAAACGGGGAGGAAAAG	ATAAAAAAGGAGGGGAAGGGAGGGAGAAAAAGGGAAGAAGGGGGAGGAACAA	hap_c62	hap_02	AG	3	NA	TC	NA	SINE/SINE
discovery	roan	dog_2156	GAAGGGGAGAGAAGAAGGAGGGAGAGGGGAAGGGAGGGACGGGGAGGAACAA	GAAAAAGAGAGAGGGGGGAAAGAGAGAAAAAGGGAAGAAGGGAGAGGAACAA	hap_c23	hap_GG01	GG	3	NA	TC	NA	SINE/SINE
discovery	roan	dog_2157	ATAAAAAAGGAGGGGAAGGGAGGGAGAAAAAGGGGAGGACGGGGAGGAGAAG	ATAAAAAAGGAGGGGAAGGGAGGGAGAAAAAGGGGAGGACGGGGAGGAGAAG	hap_03	hap_03	AA	4	NA	TT	NA	SINE/SINE
discovery	roan	dog_2162	GAAAAAGAGAGAGGGGGGAAAGAGAGAAAAAGGGAAGAAGGGAGAGGAACAA	ATAAAAAAGGAGGGGAAGGGAGGGAGAAAAAGGGGAGGACGGGGAGGAGAAG	hap_GG01	hap_03	AG	4	NA	TT	NA	SINE/SINE
discovery	roan	dog_2163	ATAAAAAAGGAGGGGAAGGGAGGGAGAAAAAGGGAAGAAGGGAGAGGAAAAG	ATAAAAAAGGAGGGGAAGGGAGGGAGAAAAAGGGGAGGACGGGGAGGAGAAG	hap_04	hap_03	AA	4	NA	TT	NA	SINE/SINE
discovery	roan	dog_2166	ATAAAAAAGGAGGGGAAGGGAGGGAGAAAAAGGGAAGAAGGGGGAGGAACAA	ATAAAAAAGGAGGGGAAGGGAGGGAGAAAAAGGGAAGAAGGGGGAGGAACAA	hap_02	hap_02	AA	4	NA	TT	NA	SINE/SINE
discovery	roan	dog_2169	ATAAAAAAGGAGGGGAAGGGAGGGAGAAAAAGGGAAGAAGGGAGAGGAAAAG	ATAAAAAAGGAGGGGAAGGGAGGGAGAAAAAGGGGAGGACGGGGAGGAGAAG	hap_04	hap_03	AA	4	NA	TT	NA	SINE/SINE
discovery	roan	dog_2173	ATAAAAAAGGAGGGGAAGGGAGGGAGAAAAAGGGAAGAAGGGAGAGGAACAA	ATAAAAAAGGAGGGGAAGGGAGGGAGAAAAAGGGGAGGACGGGGAGGAGAAG	hap_01	hap_03	AA	4	NA	TT	NA	SINE/SINE
discovery	roan	dog_2174	ATAAAAAAGGAGGGGAAGGGAGGGAGAAAAAGGGGAGGACGGGGAGGAGAAG	ATAAAAAAGGAGGGGAAGGGAGGGAGAAAAAGGGAAGAAGGGGGAGGAACAA	hap_03	hap_02	AA	4	NA	TT	NA	SINE/SINE
discovery	roan	dog_2183	ATAAAAAAGGAGGGGAAGGGAGGGAGAAAAAGGGAAGAAGGGAGAGGAACAA	ATAAAAAAGGAGGGGAAGGGAGGGAGAAAAAGGGGAGGACGGGGAGGAGAAG	hap_01	hap_03	AA	4	NA	TT	NA	SINE/SINE
discovery	roan	dog_2185	GAAAAAGAGAGAGGGGGGAAAGAGAGAAAAAGGGAAGAAGGGAGAGGAACAA	ATAAAAAAGGAGGGGAAGGGAGGGAGAAAAAGGGAAGAAGGGAGAGGAAAAG	hap_GG01	hap_04	AG	4	NA	TT	NA	SINE/SINE
discovery	roan	dog_2186	GTGAAAGAGAGAGGGGGGAGAAGGAGGAGAAGGAGGGGAGGGGGAGGAGCAA	ATAAAAAAGGAGGGGAAGGGAGGGAGAAAAAGGGGAGGACGGGGAGGAGAAG	hap_r07	hap_03	AG	3	NA	0	NA	SINE/SINE
discovery	roan	dog_2187	ATGAAAGAGAAAGAGAGGAGAGGGAGGGGAGGGGGAGAAGGGGGAGGAGCAG	ATAAAAAAGGAGGGGAAGGGAGGGAGAAAAAGGGGAGGACGGGGAGGAGAAG	hap_c25	hap_03	AG	3	NA	TC	NA	SINE/SINE
discovery	roan	dog_2189	ATAAAAAAGGAGGGGAAGGGAGGGAGAAAAAGGGAAGAAGGGGGAGGAACAA	ATAAAAAAGGAGGGGAAGGGAGGGAGAAAAAGGGAAGAAGGGGGAGGAACAA	hap_02	hap_02	AA	4	NA	TT	NA	SINE/SINE
discovery	roan	dog_2192	ATAAAAAAGGAGGGGAAGGGAGGGAGAAAAAGGGAAGAAGGGAGAGGAACAA	ATAAAAAAGGAGGGGAAGGGAGGGAGAAAAAGGGAAGAAGGGGGAGGAACAA	hap_01	hap_02	AA	4	NA	TT	NA	SINE/SINE
discovery	roan	dog_2199	ATAAAAAAGGAGGGGAAGGGAGGGAGAAAAAGGGGAGGACGGGGAGGAGAAG	ATAAAAAAGGAGGGGAAGGGAGGGAGAAAAAGGGAAGAAGGGGGAGGAACAA	hap_03	hap_02	AA	4	NA	TT	NA	SINE/SINE
discovery	roan	dog_2202	ATAAAAAAGGAGGGGAAGGGAGGGAGAAAAAGGGGAGGACGGGGAGGAGAAG	GAAAAAGAGAGAGGGGGGAAAGAGAGAAAAAGGGAAGAAGGGAGAGGAACAA	hap_03	hap_GG01	AG	4	NA	TT	NA	SINE/SINE
discovery	roan	dog_2203	GAGGAGAAGAGAGGGGGGGGAGAGCGGAGAAGGGGAGAAGAGGGAGGAGAAG	ATAAAAAAGGAGGGGAAGGGAGGGAGAAAAAGGGAAGAAGGGAGAGGAACAA	hap_r08	hap_01	AG	3	NA	TC	NA	SINE/SINE
discovery	roan	dog_2208	ATAAAAAAGGAGGGGAAGGGAGGGAGAAAAAGGGAAGAAGGGAGAGGAAAAG	ATAAAAAAGGAGGGGAAGGGAGGGAGAAAAAGGGAAGAAGGGAGAGGAACAA	hap_04	hap_01	AA	4	NA	TT	NA	SINE/SINE
discovery	roan	dog_2210	ATAAAAAAGGAGGGGAAGGGAGGGAGAAAAAGGGGAGGACGGGGAGGAGAAG	ATAAAAAAGGAGGGGAAGGGAGGGAGAAAAAGGGAAGAAGGGGGAGGAACAA	hap_03	hap_02	AA	4	NA	TT	NA	SINE/SINE
discovery	roan	dog_2213	ATAAAAAAGGAGGGGAAGGGAGGGAGAAAAAGGGGAGGACGGGGAGGAGAAG	ATAAAAAAGGAGGGGAAGGGAGGGAGAAAAAGGGAAGAAGGGGGAGGAACAA	hap_03	hap_02	AA	4	NA	TT	NA	SINE/SINE
discovery	roan	dog_2215	ATAAAAAAGGAGGGGAAGGGAGGGAGAAAAAGGGAAGAAGGGGGAGGAACAA	ATAAAAAAGGAGGGGAAGGGAGGGAGAAAAAGGGGAGGACGGGGAGGAGAAG	hap_02	hap_03	AA	4	NA	TT	NA	SINE/SINE
discovery	roan	dog_2219	ATAAAAAAGGAGGGGAAGGGAGGGAGAAAAAGGGGAGGACGGGGAGGAGAAG	GAAAAAGAGAGAGGGGGGAAAGAGAGAAAAAGGGAAGAAGGGAGAGGAACAA	hap_03	hap_GG01	AG	4	NA	TT	NA	SINE/SINE
discovery	roan	dog_2223	GAAAAAGAGAGAGGGGGGAAAGAGAGAAAAAGGGAAGAAGGGAGAGGAACAA	ATAAAAAAGGAGGGGAAGGGAGGGAGAAAAAGGGAAGAAGGGAGAGGAAAAG	hap_GG01	hap_04	AG	4	NA	TT	NA	SINE/SINE
discovery	roan	dog_2224	ATAAAAAAGGAGGGGAAGGGAGGGAGAAAAAGGGAAGAAGGGGGAGGAACAA	ATAAAAAAGGAGGGGAAGGGAGGGAGAAAAAGGGGAGGACGGGGAGGAGAAG	hap_02	hap_03	AA	4	NA	TT	NA	SINE/SINE
discovery	roan	dog_2226	ATAAAAAAGGAGGGGAAGGGAGGGAGAAAAAGGGAAGAAGGGAGAGGAACAA	ATAAAAAAGGAGGGGAAGGGAGGGAGAAAAAGGGAAGAAGGGAGAGGAACAA	hap_01	hap_01	AA	4	NA	TT	NA	SINE/SINE
discovery	roan	dog_2232	ATAAAAAAGGAGGGGAAGGGAGGGAGAAAAAGGGAAGAAGGGAGAGGAACAA	ATAAAAAAGGAGGGGAAGGGAGGGAGAAAAAGGGAAGAAGGGAGAGGAACAA	hap_01	hap_01	AA	4	NA	TT	NA	SINE/SINE
discovery	roan	dog_2235	ATAAAAAAGGAGGGGAAGGGAGGGAGAAAAAGGGAAGAAGGGAGAGGAACAA	ATAAAAAAGGAGGGGAAGGGAGGGAGAAAAAGGGAAGAAGGGAGAGGAACAA	hap_01	hap_01	AA	4	NA	TT	NA	SINE/SINE
discovery	roan	dog_2239	ATAAAAAAGGAGGGGAAGGGAGGGAGAAAAAGGGAAGAAGGGGGAGGAACAA	ATAAAAAAGGAGGGGAAGGGAGGGAGAAAAAGGGAAGAAGGGGGAGGAACAA	hap_02	hap_02	AA	4	NA	TT	NA	SINE/SINE
discovery	roan	dog_2244	ATAAAAAAGGAGGGGAAGGGAGGGAGAAAAAGGGAAGAAGGGGGAGGAACAA	GAAAAAGAGAGAGGGGGGAGGGGGAGAAAAAGGGAAGAAGGGGGAGGAACAA	hap_02	hap_r11	AG	3	NA	0	NA	SINE/SINE
discovery	roan	dog_2253	ATAAAAAAGGAGGGGAAGGGAGGGAGAAAAAGGGAAGAAGGGAGAGGAAAAG	GAAAAAGAGAGAGGGGGGAGGGGGAGAAAAAGGGAAGAAGGGGGAGGAACAA	hap_04	hap_r11	AG	3	NA	0	NA	SINE/SINE
discovery	roan	dog_2254	ATAAAAAAGGAGGGGAAGGGAGGGAGAAAAAGGGAAGAAGGGGGAGGAACAA	GAAAAAAAGAGGGGGGGGAGGGGGAGGGGAAGAAGAGAAGAAGAAGGAGCAG	hap_02	hap_c12	AG	3	NA	TC	NA	SINE/SINE
discovery	roan	dog_2256	GAAAAAGAGAGAGGGGGGAAAGAGAGAAAAAGGGAAGAAGGGAGAGGAACAA	ATAAAAAAGGAGGGGAAGGGAGGGAGAAAAAGGGAAGAAGGGAGAGGAACAA	hap_GG01	hap_01	AG	4	NA	TT	NA	SINE/SINE
discovery	roan	dog_2261	ATAAAAAAGGAGGGGAAGGGAGGGAGAAAAAGGGGAGGACGGGGAGGAGAAG	ATAGGGGAGGGGAGAAGAAAAGGACGAAAAAGAAGAGAAGAAGAAGGAGCAG	hap_03	hap_r49	AG	3	NA	TC	NA	SINE/SINE
discovery	roan	dog_2275	ATAAAAAAGGAGGGGAAGGGAGGGAGAAAAAGGGGAGGACGGGGAGGAGAAG	ATAAAAAAGGAGGGGAAGGGAGGGAGAAAAAGGGGAGGACGGGGAGGAGAAG	hap_03	hap_03	AA	4	NA	TT	NA	SINE/SINE
validation	control	dog_10003	ATAAAAGAGAGGGGGAGAAAGGGGAGGAGAAGGAGGGAAGGGGAAGGAACGG	GAAAAAAAGAGGGGGGGGAGGGGGAGGGGAAGAAGAGAAGAAGAAGGAGCAG	hap_c09	hap_c12	GG	2	NA	CC	NA	-/-
validation	control	dog_10009	ATGAAAGAGAGAGGGGGGGGGGGGAGGAAAGGGAGAGAAGAGGGAGGAGCGA	GAAAAAGAGAGGGGGAGGGGAGGGAGGAGAAGAGGAGGACGGGGAGGAGCAG	hap_v145	hap_c05	GG	2	NA	CC	NA	-/-
validation	control	dog_10013	GAAGGAAAGGAGGGGAGGGGAGGGAGGGGAAGGGGAGAAGAGGGAGGAGCGG	ATGAAAGAGAAAGAGAGGAGAGGGAGGAAAAGGAGGGAAGAGGGAGGAGCAG	hap_c161	hap_c227	GG	2	NA	CC	NA	-/-
validation	control	dog_10019	GAAAAAAAGGGGGGGGGGAGGGGGAGGGGAAGAAGAGAAGAAGAAGGAGCAG	GAAAAAAAGGGGGGGGGGAGGGGGAGGGGAAGAAGAGAAGAAGAAGGAGCAG	hap_c01	hap_c01	GG	2	NA	CC	NA	-/-
validation	control	dog_10024	GAAGAGAAGAGAGGAAGGGGAGAGAGGGGAGGGGGAGAACGGGGAGGAGCAG	GAGAAAGAGAGGGGGGGGGGAGAGAGGAAAAGGAGGGAAGAGGGAGGAGCAG	hap_c85	hap_c04	GG	2	NA	CC	NA	SINE/-
validation	control	dog_10042	ATGAAAGAGAGAGGGGGGGGGGGGAGGAAAGGGAGAGAAGAGGGAGGAGCGG	ATGAAAGAGAGAGGGGGGGGGGGGAGGAAAGGGAGAGAAGAGGGAGGAGCGG	hap_c03	hap_c03	GG	2	NA	CC	NA	SINE/-
validation	control	dog_10044	AAAGGGAGGAAGGGGAGAAGAGGGCGGAAAAGGAGGAAAGGGGGAAGAACAA	GAAAAAGAGAGAGGAAGGGGAGAGAGGGGAGGGGGAGAAGAGGGAGAAGCGG	hap_v031	hap_c88	GG	2	NA	CC	NA	SINE/-
validation	control	dog_10047	GAAAAAAAGGGGGGGGGGAGGGGGAGGGGAAGAAGAGAAGAAGAAGGAGCAG	ATAAAAGAGAGGGGGAGAAAGGGGAGGAGAAGGAGGGAAGGGGAAGGAACGG	hap_c01	hap_c09	GG	2	NA	CC	NA	SINE/-
validation	control	dog_10053	ATGAAAGAGGGGGGGAGGAGAGGGAGGAAAAGAAGAGAACGGGGAGGAGCGG	GAAGGGGAGAGAAGAAGGAGGGAGAGGGGAAGGGGAGAAGAGGGGAAAGCAG	hap_c28	hap_c154	GG	2	NA	CC	NA	SINE/-
validation	control	dog_10055	ATGAAAGAGAAAGAGAGGAGAGGGAGGGGAGGGGGAGAAGGGGGAGGAGCAG	ATGAAGAAGGGGAGAAGGAAAAAACAAGAAAGGGGAGGGCGGGGAGGAGCAG	hap_c25	hap_c94	GG	2	0	CC	CC	SINE/SINE
validation	control	dog_10060	GAGAAGAAGGGGAGGGGGAGAAGGAGGAGAAGGGGAGAAGAGGGAGGAAAAA	GAAAAAAAGGAGGGGGGGGGAGGGCGAAGAAGGAGGGGAGGGGGAGGAGAAG	hap_v046	hap_c10	GG	2	NA	CC	NA	-/-
validation	control	dog_10083	GAAAAAAAGGAGGGGGGGGGAGGGCGAAGAAGGAGGGGAGGGGGAGGAGAAG	ATGAAAGAGAAAGAGAGGAGAGGGAGGAAAAGGGGAGAAGAGGGAGGAGCAG	hap_c10	hap_c27	GG	2	NA	CC	NA	-/-
validation	control	dog_10091	GAGAAAGAGAGGGGGGGAAAAGGGAGGGGAAGAAGAAAACGAGAAGGAGCAG	ATGAAAGAGAGAGGAAGAAGGGGGAGGAGAAGAAGAGAAGAGGGAGGAGCAG	hap_c71	hap_v151	GG	2	NA	CC	NA	-/-
validation	control	dog_10099	GTGAAAGAGAGAGGGAGAAGAGAGCGGAAAAGAAGGGGAGGGGAAGGAAAAG	ATGAAAGAGAGAGGGGGGGGGGGGAGGAAAGGGGAAGAAGGAGAAGGAGAAG	hap_c13	hap_c37	GG	2	NA	CC	NA	-/-
validation	control	dog_10100	GAAAAAAAGGAGGGGGGGGGAGGGCGAAGAAGGAGGGGAGGGGGAGGAGAAG	ATAAAAGAGAGGGGGAGAAAGGGGAGGAGAAGGAGGGAAGGGGAAGGAACGG	hap_c10	hap_c09	GG	2	NA	CC	NA	SINE/SINE
validation	control	dog_10104	GAAAAAAAGGGGGGGGGGAGGGGGAGGGGAAGAAGAGAAGAAGAAGGAGCAG	ATGAAAGAGAAAGAGAGGAGAGGGAGGAAAAGGGGAGAAGAGGGAGGAGCAG	hap_c01	hap_c27	GG	2	NA	CC	NA	SINE/-
validation	control	dog_10113	GAAAAAAAGGGGGGGGGGAGGGGGAGGGGAAGAAGAGAAGAAGAAGGAGCAG	GAAAAAGAGAGGGGGAGGGGAGGGAGGAGAAGAGGAGGACGGGGAGGAGCAG	hap_c01	hap_c05	GG	2	NA	CC	NA	SINE/-
validation	control	dog_10114	ATAGGGGAGGGGGGGGGGAGGGGGAGGAGCAGGGGAGAAGAGGGAGGAACAG	GAAAAAAAGGGGGGGGGGAGGGGGAGGGGAAGAAGAGAAGAAGAAGGAGCAG	hap_v155	hap_c01	GG	2	NA	CC	NA	SINE/-
validation	control	dog_10116	GAAAAAAAGGAGGAGAGGAGGGAAAGGAGAAGGAGGGGAGGAGAAGGAGCGG	ATGAAAGAGAAAGAGAGGAGAGGGAGGGGAAGAGGAGAAGAGGGAGGAGCAG	hap_v026	hap_c226	GG	2	NA	CC	NA	-/-
validation	control	dog_10124	GAAAAAAAGGAGGGGGGGAGAGGGCGAAGAAGAAGAGAAGAGGGAGGAGCGG	GAAAAAAAGGGGGGGGGGAGGGGGAGGGGAAGAAGAGAAGAAGAAGGAGCAG	hap_c36	hap_c01	GG	2	NA	CC	NA	-/-
validation	control	dog_10129	GAAAAAAAGGAGGGGGGGGGAGGGCGAAGAAGGAGGGGAGGGGGAGGAGAAG	GAAGAGAGAAGGGAGAGGAGAGGGCGAAGCAGGAGGGAAGAGGGAGGAGCAG	hap_c10	hap_v016	GG	2	NA	CC	NA	-/-
validation	control	dog_10132	GAAAAAAAGGGGGGGGGGAGGGGGAGGGGAAGAAGAGAAGAAGAAGGAGCAG	GAAAAAAAGGAGGGGGGGGGAGGGCGGGGAAGGGAAGAAGGGAGAGGAACAA	hap_c01	hap_c90	GG	2	NA	CC	NA	-/-
validation	control	dog_10141	GAAAAAAAGGAGGGGGGGGGAGGGCGAAGAAGGAGGGGAGGGGGAGGAGAAG	GAAAAAGAGAGGGGGAGGGGAGGGAGGAGAAGAGGAGGACGGGGAGGAGCAG	hap_c10	hap_c05	GG	2	NA	CC	NA	-/-
validation	control	dog_10143	GAAAAAAAGGGGGGGGGGAGGGGGAGGGGAAGAAGAGAAGAAGAAGGAGCAG	GAGGGGGAGGGGGGGGGGGGAGAGAGGAAAAGGAGGGGAGGGGGAGAAGCGG	hap_c01	hap_v042	GG	2	NA	CC	NA	-/-
validation	control	dog_10155	ATGAAAGAGAGAGGGGGGGGGGGGAGGAAAGGGAGAGAAGAGGGAGGAGCGG	GAAAAAGAGAGGGGGAGGGGAGGGAGGAGAAGAGGAGGACGGGGAGGAGCAG	hap_c03	hap_c05	GG	2	NA	CC	NA	-/-
validation	control	dog_10160	GAAAAAAAGGGGGGGGGGAGGGGGAGGGGAAGAAGGGAACGGGGAGAAGCGG	GAAAAAAAGGGGGGGGGGAGGGGGAGGGGAAGAAGAGAAGAAGAAGGAGCAG	hap_v118	hap_c01	GG	2	NA	CC	NA	-/-
validation	control	dog_10174	GTGAAGAAGGGGGGAAGGAGAAGGAGGGGAAGGGGAGAAGAGGAAGGAAAAG	GAAAAAAAGGAGGGGGGGGGAGGGAGGGGCAGGGGAGAAGAGGGAGGAACGG	hap_c32	hap_v123	GG	2	NA	CC	NA	-/-
validation	control	dog_10176	GAAAAAAAGGGGGGGGGGAGGGGGAGGGGAAGAAGAGAAGAAGAAGGAGCAG	ATGAAAGAGAGAGGGGGGGGGGGGAGGAAAGGGAGAGAAGAGGGAGGAGCGG	hap_c01	hap_c03	GG	2	NA	CC	NA	SINE/-
validation	control	dog_10177	GTGAAAGAGAGAGGGAGAAGAGAGCGGAAAAGAAGGGGAGGGGAAGGAAAAG	GAGAAAGAGGGAGGGAGGGAGGAGAGGGGAAAGGGGAAACGGGGAGGAACAG	hap_c13	hap_c11	GG	2	NA	CC	NA	-/-
validation	control	dog_10179	ATAGGGGAGGGGAGAAGAAAAGGACGAAAAAGGGGAGAAGGAGGAGGAGCAG	GAAAAAAAGGAGGGGGGGGGAGGGCGAAGAAGGAGGGGAGGGGGAGGAGAAG	hap_c230	hap_c10	GG	2	NA	CC	NA	SINE/-
validation	control	dog_10219	ATGAAAGAGGGGGGGAGGAGAGGGAGGAAAAGAAGAGAACGGGGAGGAGCGG	GAGAAAGAGAGAGGGGGGAAAGAGAGGAAAAGGGGAGAAGGGGGAGGCACAG	hap_c28	hap_v057	GG	2	NA	CC	NA	SINE/SINE
validation	control	dog_10271	GAAAAAAAGGGGGGGGGGAGGGGGAGGGGAAGAAGAGAAGAAGAAGGAGCAG	GAGAAAGAGGGAGGGGGGGAGGAGAGGGGAAAGGGGAAACGGGGAGGAACAG	hap_c01	hap_c16	GG	2	NA	CC	NA	-/-
validation	control	dog_10274	ATAGGGGAGGGGAGAAGAAAGGAAAGGAGAAGGAGAAAACGGGGAGGAAAAG	ATAGGGGAGGGGAGAAGAAAAGGACGAAAAAGGGGAGAAGGAGGAGGAGCAG	hap_c62	hap_c230	GG	2	NA	CC	NA	-/-
validation	control	dog_10264	GAGAAAGAGAGAGGGGGGGGAGGGCGAAGAAGGAGGGAAGAGGGAGGAGCGG	GAAAAAGAGAGAGGGGGAAAAAGGAGGGGAAAGGAAGAAGAGGGAGGAGCGG	hap_c74	hap_c21	GG	2	NA	CC	NA	SINE/SINE
validation	control	dog_10017	GTGAAGAAGGGGGGAAGGAGAAGGAGGGGAAGGGGAGAAGAGGAAGGAGCAG	GAAAAAGAGAGGGGGAGGAGGGGGAGGGGAGGGGGAGAAGGGGGAGGAGCAG	hap_v033	hap_c87	GG	2	NA	CC	NA	-/-
validation	control	dog_10023	GAAAAAAAGGGGGGGGGGAGGGGGAGGGGAAGAAGAGAAGAAGAAGGAGCAG	GAAAAAAAGGAGGGGGGGGGAGGGCGAAGAAGGAGGGGAGGGGGAGGAGAAG	hap_c01	hap_c10	GG	2	NA	CC	NA	SINE/-
validation	control	dog_10025	GAAAAAAAGGAGGGGGGGGGAGAGAGGAGAAGGGGAGAAGAGGGAGGAGCAA	GAAAAAAAGGAGGGGGGGGGAGAGCAAGGCAGAAGAGGGCGAGGAGGAACAA	hap_c205	hap_c35	GG	2	NA	CC	NA	SINE/-
validation	control	dog_10032	ATGAAAGAGAAAGAGAGGAGAGGGCGAAGCAGAAGAAAAGGGGGAGGAGCAG	ATAAAAGAGAGGGGGAGAAAGGGGAGGAGAAGGAGGGAAGGGGAAGGAACGG	hap_v154	hap_c09	GG	2	NA	CC	NA	-/-
validation	control	dog_10038	GAAAAAAAGGGGGGGGGGAGGGGGAGGGGAAGAAGAGAACGGGGAGAAGCGG	GAAAAAGAGAGGGGGAGGAGGGAGAGGGGAAGGGGAGAACGGGGAGAAGCAG	hap_c89	hap_v109	GG	2	NA	CC	NA	SINE/-
validation	control	dog_10064	GAAAAAGAGAGGGGGAGGGGAGGGAGGAGAAGAGGAGGACGGGGAGGAGCAG	GAAAAAGAGAGGGGGAGGGGAGAGAGGGGAAAGGGAGAAGGAGGAGGAGCAG	hap_c05	hap_v107	GG	2	NA	CC	NA	SINE/-
validation	control	dog_10093	GAAGGGGAGAGAAGAAGGAGGGAGAGGGGCAGGAGGGAAGAGGGAGGAGCAG	ATGAAAGAGAGAGGGGGGGGGGGGAGGAAAGGGAGAGAAGAGGGAGGAGCGG	hap_c15	hap_c03	GG	2	NA	CC	NA	-/-
validation	control	dog_10103	GAAAAAGAGAGGGGAAGGAGGGGGAGGGGAAGAAGAGAAGAAGAAGGAGCAG	GAAAAAAAGGGGGGGGGGAGGGGGAGGGGAAGAAGAGAAGAAGAAGGAGCAG	hap_c188	hap_c01	GG	2	NA	CC	NA	-/-
validation	control	dog_10108	ATAAAAGAGAGGGGGAGAAAGGGGAGGAGAAGGAGGGAAGGGGAAGGAACGG	GAAGAGGAGAGAGGGGGGGGAGAGAGGGGCAGGAGAGAAGGGGGAGGCGAAG	hap_c09	hap_v013	GG	2	NA	CC	NA	-/-
validation	control	dog_10128	GAAAAAAAGGAGGGGGGGGGAGAGAGGGGCAGGAGGGAAGGGGGAGGAACAG	GAAGAGAGAAGGGGGAGGAGAGAGAGGGGAAGAAGAGGGGAGGGAGGAAAAG	hap_v127	hap_v095	GG	2	NA	CC	NA	-/-
validation	control	dog_10158	GAGAAAGAGAGGGGGGGGAGGGGGAGGAGCAGGGGAGAAGAGGGAGGAACAG	GAAAAAGAGAGGGGAAGGAGGGAAAGGAGAAGGGGAGAAGGGGAAGGAGCAG	hap_v052	hap_c02	GG	2	NA	CC	NA	SINE/-
validation	control	dog_10163	GAAGGGGAGAGAAGAAGGAGGGAGAGGGGAAGGGAGGGACGGGGAGGAACAA	GAAGAGGAGAGAGGGGGGGGAGAGAGGGGCAGGAGAGAAGGGGGAGGCGAAG	hap_c23	hap_v013	GG	2	NA	CC	NA	-/-
validation	control	dog_10172	GAGAAAGAGGGAGGGAGGGAGGAGAGGGGAAAGGGGAAACGGGGAGGAACAG	ATAAAAGAGAGGGGGAGAAAGGGGAGGAGAAGGAGGGAAGGGGAAGGAACGG	hap_c11	hap_c09	GG	2	NA	CC	NA	-/-
validation	control	dog_10187	GAAAAAAAGGGGGGGGGGAGGGGGAGGGGAAGAAGAGAAGAAGAAGGAGCAG	GAAAAAGAGAGGGGGAGGGGAGGGAGGAGAAGAGGAGGACGGGGAGGAGCAG	hap_c01	hap_c05	GG	2	NA	CC	NA	-/-
validation	control	dog_10195	GAAAAAGAGAGGGGAAGGAGGGAAAGGAGAAGGGGAGAAGGGGAAGGAGCAG	GAAAAAGAGAGAGGGGGAAAAAGGAGGGGAAAGGAAGAAGAGGGAGGAGCAA	hap_c02	hap_v114	GG	2	NA	CC	NA	-/-
validation	control	dog_10201	GAAAAAAAGGAGGGGGGGAGAGGGAGAAAAAGGGAAGAAGGGAGAGGAACAA	ATGAAAGAGAAAGAGAGGAGAGGGAGGAAAAGGAGGGAAGAGGGAGGAGCAG	hap_v024	hap_c227	GG	2	NA	CC	NA	-/-
validation	control	dog_10204	GAAGAGAGGAGAGGGGGGGGAGAGAGGGGAAGGGGAGGGGAGGGAGGAGCAG	GAGAAAGAGAGAGGGGGGGAGGAGAGGAAAAGGAGGGAAGGAGGAGGCACAA	hap_r26	hap_c56	GG	2	0	CC	NA	SINE/-
validation	control	dog_10217	GAAAAAAAGGAGGGGGGGAGGGGGCGAAGAAGAAGAGAAGAGGGAGGAGCGG	GTGAAAGAGAGAGGGAGAAGAGAGCGGAAAAGAAGGGGAGGGGAAGGAAAAG	hap_c210	hap_c13	GG	2	NA	CC	NA	-/-
validation	control	dog_10218	ATAGGGGAGGGGAGAAGAAAAGGACGAAAAAGGGGAGAAGGGGGAGGCACAG	GAAGGAAAGGAGGGAAGGGGAGGGAGGGGAAGGGGAGAAGAGGGAGGAGCGG	hap_c97	hap_c162	GG	2	NA	CC	NA	SINE/-
validation	control	dog_10220	GAAAAAGAGAGGGGGAGGAGGGAGAGGGGAAGAGGAGAAGAGGAAGGAGAAA	GAGAAAGAGAGGGGGGGGGGAGAGAGGAAAAGGAGGGAAGAGGGAGGAGCAG	hap_c186	hap_c04	GG	2	NA	CC	NA	-/-
validation	control	dog_10222	ATGAAAGAGAAAGAGAGGAGAGGGAGGGGAGGGGGAGAAGGGGGAGGAGCAG	ATAGGGGAGGGGAGAAGAAAAGGACGAAAAAGAAGAGAAGAAGAAGGAGCAG	hap_c25	hap_r49	GG	2	NA	CC	NA	-/-
validation	control	dog_10223	GAAAAAGAGAGGGGAAGGAGGGAAAGGAGAAGGGGAGAAGGGGAAGGAGCAG	GTGAAGAAGGGGGGAAGGAGAAGGAGGGGAAGGGGAGAAGAGGAAGGAAAAG	hap_c02	hap_c32	GG	2	NA	CC	NA	-/-
validation	control	dog_10228	ATGAAAGAGAGAGGGGGGGGGGGGAGGAAAGGGAGAGAAGAGGGAGGAGCGG	GAAAAAAAGGGGGGGGGGAGGGGGAGGGGAAGAAGAGAAGAAGAAGGAGCAG	hap_c03	hap_c01	GG	2	NA	CC	NA	-/-
validation	control	dog_10233	GAAGGGGAGAGAAGAAGGAGGGAGAGGGGAAGGGAGGGACGGGGAGGAACAA	GAAAAAAAGGGGGGGGGGAGGGGGAGGGGAAGAAGAGAAGAAGAAGGAGCAG	hap_c23	hap_c01	GG	2	NA	CC	NA	-/-
validation	control	dog_10254	ATAGGGGAGGGGAGAAGAAAAGGACGAAAAAGGGGAGAAGGAGGAGGAGCAG	ATGAAAGAGAAAGAGAGGAGAGGGAGGAAAAGGGGAGAAGAGGGAGGAGCAG	hap_c230	hap_c27	GG	2	NA	CC	NA	-/-
validation	control	dog_10268	GAAAAAAAGGAGGGGGGGGGAGAGAGGAGAAGGGGAAAAGGAGGAGGAGCAG	GAAAAAAAGGGGGGGGGGAGGGGGAGGGGAAGAAGAGAAGAAGAAGGAGCAG	hap_v129	hap_c01	GG	2	NA	CC	NA	-/-
validation	control	dog_10010	GAGAAAAAGGAGGGGGGGGGAGGACGAAGAAGGAGGGGAGGAGAAGGAGAGG	GAAGGAAAGGAGGGGGGGGGAGGGAGGGGAAGGAGGGAAGAGAGAGGAAAAG	hap_v010	hap_v087	GG	2	NA	CC	NA	SINE/SINE
validation	control	dog_10011	AAAGAGAGAAGGGAGAGGAGAGGGAGGAGCAGGGGAGAAGAAGAAGGAGCAG	GTAGGGAGGAAGAGAAGAAAGGGGAGGAGCAGGAGGAAAGAAGAAGGAACAG	hap_v173	hap_r14	GG	2	NA	CC	NA	SINE/SINE
validation	control	dog_10014	GAAAAAAAGGAGGGGGGGAGGGGGAGGAGCAGGGGAGAAGAGGGAGGAACAG	GAAAAAGAGAGGGGGAGGAGGGGGAGGAAAAGGGGAGAAGAGGGAGGAGCGG	hap_c211	hap_v108	GG	2	NA	CC	NA	SINE/-
validation	control	dog_10021	ATGAAAGAGAGAGGGAGGAGGGGGAGGGGAAGGAGGGGGGGGGGAGGAACAA	GAAGAGAGAAGGGGGGGGGGAGAGAGGGGAAGGAGAGAAGAGGGAGGAGCGG	hap_v147	hap_v093	GG	2	NA	CC	NA	SINE/SINE
validation	control	dog_10022	GAAGGAAAGGAGGGAAGGGGAGGGAGGGGAAGGAGGGAAGAGGGAGGAGCAG	ATAGGGGAGGGGAGAAGAAAAGAGAGGAAAAGGGGAGAAGAGGGAGGAGCGG	hap_v089	hap_v003	GG	2	NA	CC	NA	SINE/SINE
validation	control	dog_10026	ATAGGGGAGGGGAGGAGGAGAAAGAGGGGCAGAGGAGAAGGGGGGAAAGCAG	GAAGAGAGAAGGGAGAGGAGAGAGAGGAAAAGAAGAGGGCGAGGAGGAGCAG	hap_v156	hap_v017	GG	2	NA	CC	NA	SINE/SINE
validation	control	dog_10027	GAAGGGGAGGGGAGAAGGGGAGAGAGGAAAAGGAGGGAAGAGGGAGGAACAG	GAAGAGAGGAGAGGGGGGGGAGAGAGGGGAAGGAGGGGAGAGAGAGGAAAAG	hap_v073	hap_v014	GG	2	NA	CC	NA	SINE/SINE
validation	control	dog_10028	GTAGGGAGGAAGAGAAGAAAGGGGAGGAGCAGGAGGAAAGAAGAAGGAACAG	ATAAAAAAGGAGGGGAAGGGAGGGAGAAAAAGGGAAGAAGGGAGAGGAACAA	hap_r14	hap_01	AG	3	NA	TC	CT	-/-
validation	control	dog_10030	GAAAAAAAGGAGGGGGGGGGAGGGCGGGGAAGGGGAGAAGGGGGAGGAGCAG	GAAAAAAAGGAGGGGGGGGGAGGGCGGGGAAGGGGAGAAGGGGGAGGAGCAG	hap_v002	hap_v002	GG	2	NA	CC	NA	SINE/SINE
validation	control	dog_10035	AAGAAAGAGGGAGGGGGGGAGGAGAGGGGAAAGGGGAAACGGGGAGGAACAG	GAAAAAAAGGAGGGGGGGAGGGGGAGGAGCAGGGGAGAAGAGGGAGGAACAG	hap_c238	hap_c211	GG	2	NA	CC	NA	-/-
validation	control	dog_10037	GAGAAAGAGAGAGGGGGGGGAGGGAGGAGCAGGGGAGAAGAGGGAGGAACAG	GAAGGAAAGGAGGGGGGGGGAGGGAGGGGAAGGAGGGAAGAGGGAGGAGCAG	hap_v009	hap_v086	GG	2	NA	CC	NA	SINE/SINE
validation	control	dog_10045	GAAGGGGAGAGAAGAAGGAGGGGGAGGAAAGGGGGAGAAGAGGGAGGAACAG	GAAAAAAAGGAGGAGAGGAGGGAAAGGAGAAGGAGGGGAGGAGAAGGAGCGG	hap_v080	hap_v026	GG	2	NA	CC	NA	SINE/SINE
validation	control	dog_10046	ATGAAAGAGAGAGGAAGAAGGGGGAGGAGAAGGGAGGGGCGAGAAGGAGCGG	GAAGGGGAGGGGAGAAGGGGAGAGAGGGGAAGGAGAGAAGGGGGAGGCGAAA	hap_v150	hap_v069	GG	2	NA	CC	NA	SINE/-
validation	control	dog_10048	AAAGAGAGAAGGGAGAGGAGAGGGAGGGGAAGGGGAGAAGAGGGAGGAACAG	GAGGAGAAGAGAGGGGGGGGAGAGCGGAGAAGGGGAGAAGAGGGAGGAGCGG	hap_v171	hap_c107	GG	2	NA	CC	NA	SINE/SINE
validation	control	dog_10049	GAAAAAAAGGAGGGGGGGGGAGAAAGGGGAAGGGGAGGGCGGAGAGAAGCGG	GAGAAAGAGAGAGGGGGGGGAGGGAGGAGCAGGGGAGAAGAGGGAGGAACAG	hap_v133	hap_v009	GG	2	NA	CC	NA	SINE/-
validation	control	dog_10056	GAAGGGGAGGGGAGAAAGGGAGGGAGAAAAAGGGAAGAAGGGAGAGGAACAA	GAAGAGAGAAGGGAGAGGAGAGGGCGAAGAAGAAGAGAAGAGGGAGGAGCAG	hap_v075	hap_v096	AG	3	NA	TC	CT	SINE/SINE
validation	control	dog_10065	GAAGGGGAGGGGAGAAGGGGAGAGAGGGGAAGAAGAGAAGAAGAAGGAGAAG	AAAGAGAGAAGGGAGAGGAGAGGGAGGGGAAGGAGGGGAGGAGGAAGAGCGG	hap_v070	hap_v032	GG	2	NA	CC	NA	SINE/SINE
validation	control	dog_10069	GAAGGGGAGAGAAGAAGGAGGGAGAGGGGAAGGGGAGAAGAGGGAGGAACAG	GAAGAGAAGAGAGGGGGAAGAGAGAGGGGAAGGGGGGAAGGGGGAGGAGCGG	hap_v081	hap_c84	GG	2	NA	CC	NA	SINE/-
validation	control	dog_10071	GTAGGGGAGGGGAGAAGGAGAGAGAGGGGAAGGGGAGAAGAGGGAGGAGCAG	GTGAAAGAGGGGGGGAGGAGGGGGAGGAGAAGGAGAGGGCGGGGAGGCGAAA	hap_v036	hap_v034	GG	2	NA	CC	NA	SINE/SINE
validation	control	dog_10074	GAAAAAAAGGAGGGGGGGAGGGAGAGGGGAGGGGGAGAAGGAGGAGGAGCAG	GAAAAAAAGGAGGGGGGGAGGGGGAGGAGCAGGGGAGAAGAGGGAGGAACAG	hap_r41	hap_c211	GG	2	NA	CC	NA	SINE/SINE
validation	control	dog_10075	GTAGGGGAGGGGAGAAGGAGAGAGAGGGGAAGGGGGGGAGGGGGAGGAACAA	ATAAAGAGGGGAGGGAGAAGGGGGAGGAGAAGGGGAGAAGAGGAAGGAAAAG	hap_v005	hap_v161	GG	2	NA	CC	NA	SINE/SINE
validation	control	dog_10077	GAAAAAAAGGAGGGGGGGGGAGAGAGGAGAAGGGGAGAACGGGGAGGAAAAG	GAAAAAAAGGAGGGGGGGAGGGGGAGGAGCAGGGGAGAAGAGGGAGGAACAG	hap_v128	hap_c211	GG	2	NA	CC	NA	SINE/-
validation	control	dog_10079	GAAAAAGAGAGGGGGAGGAGGGGGAGGGGAAGGGGGGAAGAGGGAGGAGAAA	ATAAAAAAGGAGGGGAAGGGAGGGAGAAAAAGGGAAGAAGGGAGAGGAACAA	hap_v021	hap_01	AG	3	NA	TC	NA	SINE/-
validation	control	dog_10081	GAAAAAAAGGAGGGGGGGAGAGGGAGAAAAAGGGAAGAAGGGAGAGGAACAA	GAAAAAAAGGAGGGGGGGGGAAGGAGGGGAAGGGGAAGAGAAGGAGGAGCAG	hap_v024	hap_r39	GG	2	NA	CC	NA	SINE/-
validation	control	dog_10086	GAAGGAAAGGAGGGGAGGGGAGGGAGGGGAAGGAGGGAAGAGAGAGGAAAAG	GAAAAGAAGGGAGGGAGGGGGGGGAGGGGAAGGGGAGAAGAGGGGAAAGCAA	hap_v088	hap_v105	GG	2	NA	CC	NA	SINE/-
validation	control	dog_10087	ATAAAAAAGGAGGGGAAGGGAGGGAGAAAAAGGGGAGGACGGGGAGGAACAG	GTAAAAAAGGAAGGGAGGAAAGGGAGGAAAAGAAGGGAAGGGGGAAGAGCGA	hap_v165	hap_c66	AG	3	1	TC	CT	SINE/-
validation	control	dog_10089	GTGAAAAAGGGGAGGGGGGGGGGGAGGAAAAGAAGGGAAGGGGGAAGAGCGG	GAAAAAAAGGAGGGGAAGGGAGAGAGGGGAGGGGGAGAACGGGGAGAAGCAG	hap_v001	hap_v141	AG	2	NA	CC	NA	SINE/-
validation	control	dog_10094	GAAGAGAGAAGGGGGGGGGGAGGGCGAAAAAGGGAGGGACAGGGAGGAAAAA	GAAAAAGAGAGGGGGAGGAGGGGGAGGGGAAGGGGGGAAGAGGGAGGAGAAA	hap_v015	hap_v021	GG	2	NA	CC	NA	SINE/SINE
validation	control	dog_10095	GAAAAAAAGGAGGGGGGGGGAGGGCGAAGAAGGAGGGGAGGGGGAGGAGAAG	AAAGAGAGAAGGGAGAGGAGAGGGAGGGGAAGGAGGGGAGAGGAAGGAACGG	hap_c10	hap_r58	GG	2	NA	CC	NA	SINE/SINE
validation	control	dog_10096	GAAAAAAAGGAGGGGGGGGAGGAGAGGGGAAGGGGGAAACGGGGAGGAACAG	GAAAAAAAGAGAGGGGGGAGGGAGAGGGGAAAGGAAGAAGAGGGAGGAGAAG	hap_v134	hap_v144	GG	2	NA	CC	NA	SINE/SINE
validation	control	dog_10102	GAAGGGAGGAAGAGAAGGGGAGAGAGGAAAAGGGGAGAAGAGGGAGGAACAG	GAAAAAAAGGAGGGGGGGGGAGAGAGGAGAAGGGGAGAAGAGGGAGGAGCAA	hap_v085	hap_c205	GG	2	NA	CC	NA	SINE/SINE
validation	control	dog_10105	GAAAAAGAGAGAGGGGGAAAAGAGAGGGGAAGGGGAGAAGAGGAAGAAGCAA	GAAGGGGAGGGGAGAAGGGGAGAGAGGGGAGGGGGAGAAGGGGGAGGAGCAG	hap_v113	hap_c26	GG	2	NA	CC	NA	SINE/SINE
validation	control	dog_10106	GAAAAAAAGGAGGGGGGGGGAGGGAGGGGAAGGGGAGAAGAGGGAGGAGCGG	GAAAAAAAGGAGGGGGGGGGAGAAAGGGGCAGGAGGGAAGGGGGGAAAGCAG	hap_v125	hap_v132	GG	2	NA	CC	NA	SINE/SINE
validation	control	dog_10107	GAAGAGAAGAGAGGGGGAAGAGAGAGGGGAAGGGGGGAAGAGGGAGGAACGG	ATGAAAGAGAGAGGGGGGAAGGGGAGGAGCAGGGGAGAAGAGGGAGGAACAG	hap_v101	hap_v146	GG	2	NA	CC	NA	SINE/-
validation	control	dog_10110	GAGAAAAAGGAGGGGGGGGGAGGACGAAGAAGGAGGGGAGGAGAAGGAGAGG	GTAGGGGAGGGAGGGAGAAGAGAGCGAAGAAGGGGAGAAGGGGGAGGCGCGG	hap_v010	hap_v006	GG	2	NA	CC	NA	SINE/SINE
validation	control	dog_10111	GAAGGGGAGAGAAGAAGGAGGGGGAGGGGAAGGGGAGAACGGGGAGAAGCAA	GAGAAAGAGAGGGGGGGGGGAGAGAGGGGAAGGGGAGAAGAGGGAGGAAAAG	hap_v012	hap_v051	GG	2	NA	CC	NA	SINE/-
validation	control	dog_10115	GAAAAAAAGGAGGGGGGGAGGGGGAGGAGAAAAGGAGAAGAGGGAGGAGCAG	GAGAAAGAGAGAGGGAGAGAAGGGAGGAGCAAGGAAGAAGGGGGAGAAGCAG	hap_v135	hap_v060	GG	2	NA	CC	NA	-/-
validation	control	dog_10126	GAAAAAAAGGAGGGGGGGAGGGGGAGGAAAAGGGGAAAACGAGAAGGAGCAG	GAAGGGGAGAGAGGGGGGGGAGGGAGGGGAAGGGGAGAAGAGGGGAAAGCAA	hap_v136	hap_v076	GG	2	NA	CC	NA	SINE/SINE
validation	control	dog_10131	GAGAAAGAGGGAGGGGGGAGGGGGAGGAGAAGAGGAGAAGAGGGAGGAGCGG	GAAAAAAAGGAGGGGGGGGGAGGGAGGGGCAGGGGAGAAGAGGGAGGAACGA	hap_c116	hap_v124	GG	2	NA	CC	NA	SINE/SINE
validation	control	dog_10136	GAAGGGGAGGGGAGAAGGGGAGAGAGGGGAGGGGGAGAAGGGGGAGGAGCAG	GAAGGGGAGAGAAGAAGGAGGGAGAGGGGAAGGGAGGGAGAGGGAGGAACAG	hap_c26	hap_v082	GG	2	NA	CC	NA	SINE/SINE
validation	control	dog_10137	GAGAAGAGGAGGAGAAGGGGAGAGAGGGGAAGGAGGGAAGAGGGAGGAGCAG	GTAGGGAAGGGGAGAAGGAGGGGGAGGAAAAGGGGGAAAGAGGGAGAAGCAA	hap_v007	hap_v038	GG	2	NA	CC	NA	SINE/SINE
validation	control	dog_10138	GAAGGGGAGGGGAGAAGGGGAGAGAGGGGAGGGGGAGAAGGGGGAGGAGCAG	GTGAAAGAGAGGAGAAGGGGAGAGAGGGGAGGGGGAGAAGGGGGAGGAACAG	hap_c26	hap_v035	GG	2	NA	CC	NA	SINE/SINE
validation	control	dog_10140	GTAAAAAAGGAGGGAAGGAGGGAGAGGGGAAGGGAGGGGCGGGGAGGAGCGG	AAAGAGAGAAGGGAGAGGAGAGGGAGGGGAAGGAGGGGAGAGGAAGGAACGG	hap_c104	hap_r58	GG	2	NA	CC	NA	SINE/-
validation	control	dog_10146	GAGAAAGAGAGAGGGGGGGGAGGGCGAAGAAGGAGGGGAGGGGGAGGAGCAG	GTAAAAAAGGAAGGGAGGAAAGGGAGGAAAAGAAGGGAAGGGGGAAGAGCGA	hap_v053	hap_c66	GG	2	NA	CC	NA	-/-
validation	control	dog_10147	GAAAAAAAGGAGGGAAGGAGGGGGAGGAGAAGGAGAGAAGGGGGAGGAGCAG	GAAGGGGAGAGAGGGGGGGGAGGGAGGGGAAGGGAGGGGCGAGAAGGAGCGG	hap_v142	hap_v077	GG	2	NA	CC	NA	SINE/-
validation	control	dog_10149	GAAAAAAAGAGGGGGGGGAGGGGGAGGGGAAGAAGAGAAGAAGAAGGAGCAG	GAGAAAAAGGAGGGGGGGGGAGGGCGAAAAAAAGGAGAAGAGAGAGAAGCAG	hap_c12	hap_v062	GG	2	NA	CC	NA	SINE/SINE
validation	control	dog_10150	ATAGGGGAGGGGAGAAGAAAAGAGAGGAAAAGGGGAGAAGAGGGAGGAGCGG	GAAGGGGAGGGGAGAAGGGGAGAGAGGGGAGGGGGAGAAGAGGGAGGAACAG	hap_v003	hap_v067	GG	2	NA	CC	NA	SINE/-
validation	control	dog_10151	GAAGGGGAGGGGAGAAGGGGAGAGAGGGGAGGGGGAGAAGGGGGAGGAACAG	GAAGAGAGAAGGGAGAGGAGAGGGCGAAGCAGAAGAAAAGGGGGAGGAGCAG	hap_v066	hap_c168	GG	2	NA	CC	NA	SINE/-
validation	control	dog_10152	GAAAAAAAGGAAGGGAGAGAAGGGAGGAGCAAGAGAGAAGAGGGAGAAGCGG	GAAAAAAAGGAAGGGAGAGAAGGGAGGAGCAAGAGAGAAGAGGGAGAAGCGG	hap_v027	hap_v027	GG	2	NA	CC	NA	SINE/SINE
validation	control	dog_10153	ATGAAAGAGAGAGGGGGGGGGGGGAGGAAAGGGAGAGAAGAGGGAGGAGCGG	GAGGAGAAGAGAGGGGGGGGAGAGCGGAGAAGGGGAGAAGAGGGAGGAGCGG	hap_c03	hap_c107	GG	2	NA	CC	NA	SINE/SINE
validation	control	dog_10156	GAAAAAGAGAGGGGAAGGAGGGAAAGGAGAAGGGGAGAAGGGGAAGGAGCAG	GAAAAAAAGAGGGGGGGGAGGGGGAGGGGAAGAAGAGAAGAAGAAGGAGCAG	hap_c02	hap_c12	GG	2	NA	CC	NA	SINE/-
validation	control	dog_10157	GAGAAAGAGAGAGGGGGGGGAGAGAGGGGAAGGGGAGAAGAGGGAGGAGCGG	GAAAAGAGGGGGGGGAGGAGAGAGAGGGGAAGAAGAGGGCGAGAAGGAGCAG	hap_v055	hap_v020	GG	2	NA	CC	NA	SINE/-
validation	control	dog_10159	GAGAAAAAGGAGGGGGGGGGAGGACGAGGAAGAGGAGGGCGGGGAGAAGAAG	GAAAAAGAGGGGAGGGGAGGAGAGAGGAAAAGGAGGGAAGGAGGAGGCACAA	hap_v063	hap_v106	GG	2	NA	CC	NA	SINE/SINE
validation	control	dog_10164	GAAAAAAAGGAGGGGGGGGGAGGGCGGGGAAGGGAAGAACGAGAAGGAGCAG	ATAGAAGAGAGGGGGGGAAAAGGGAGGGGAAGGGGAGAAGAGGGAGGAGCGG	hap_v121	hap_v004	GG	2	NA	CC	NA	SINE/SINE
validation	control	dog_10166	ATAAAAAAGGAGGGGAAGGGAGGGAGAAAAAGGGAAGAAGGGGGAGGAACAA	GAAAAAAAGGAGGGGGGGAAAGAGCGAAGAAGGGGAGAAGAGGGAGAAGCGG	hap_02	hap_v139	AG	3	NA	TC	CT	SINE/SINE
validation	control	dog_10170	GTAGGGGAGGGAGGGAGAAGAGAGCGAAGAAGGGGAGAAGGGGGAGGCGCGG	GTAGGGAAGGGGAGAAGGAGGGGGAGGGGAAAGAGAGAAGAGGGGAAAGCAG	hap_v006	hap_c65	GG	2	NA	CC	NA	SINE/SINE
validation	control	dog_10175	GAAAAAAAGGGGAGGGGGGGAGGGAGGGGAAGGAGAGGACGGGGAGGAGCAG	GAGAAGAGGAGGAGAAGGGGAGAGAGGGGAAGGAGGGAAGAGGGAGGAGCAG	hap_v120	hap_v007	GG	2	NA	CC	NA	SINE/SINE
validation	control	dog_10178	GAAGGGAGGAAGGGGAGAAGGGGGCAAGAAAGGGGAGAAGAGAGAGGAAAAG	AAAGAGAGAAGGGAGAGGAGAGGGAGGGGAAGGAGGGGAGAGGAAGGAACGG	hap_v084	hap_r58	GG	2	NA	CC	NA	SINE/-
validation	control	dog_10180	GAAGGGGAGGGGAGGAGGAGAAGGAGGAGAAAGGGAGAAGGGGGAGGCGAAG	GAGAAAGAGAGAGGGGGGGGAGGGCGAAGAAGGAGGGGAGGGGGAGGAGAAG	hap_c150	hap_c130	GG	2	NA	CC	NA	SINE/-
validation	control	dog_10182	GAAAGGAAGGGGGGGGGGGGAGGGAGGGGAAGGGGAGAAGAGGGGAAAGCAA	GAAAAAAAGGAGGGGGGGGGAGAGCAAGGCAGAAGAGGGCGAGGAGGAACAA	hap_v019	hap_c35	GG	2	NA	CC	NA	-/-
validation	control	dog_10183	GTGAAAAAGGGGAGGGGGGGGGGGAGGAAAAGAAGGGAAGGGGGAAGAGCGG	ATAGGGGAGGGGAGAAGAAAAGGACGAAAAAGGGGAGAAGGAGGAGGAGCGG	hap_v001	hap_v158	GG	2	NA	CC	NA	SINE/SINE
validation	control	dog_10185	GAAAAAAAGGAGGGGGGGAGGGAGAGGGGAGGGGGAGAAGGAGGAGGAGCAG	GAAAAAAAGGAGGAGAGGGGAGAGAGGAGAAGGGGAGAAGGAGAAGGAACAG	hap_r41	hap_v025	GG	2	NA	CC	NA	-/-
validation	control	dog_10186	ATAGGGGAGAGAGGGGGGGGAGGGAGGGGAAGGGAGGGGCGAGAAGGAGCGG	GAAAAAAAGGAGGGGGGAAAAGAACAAAAAAGGGAGGGAGAAGAAGGAACAA	hap_v160	hap_v140	GG	2	NA	CC	NA	SINE/SINE
validation	control	dog_10189	GAAGGGGAGGGGAGAAGGAGAGAGAGGGGCAGGAGGGAAGAGGGAGGAGAAG	ATGAAAGAGAGAGGAAGAGGAGAGAGGGGAGGGGGAGAAGGGGGAGGAGCAG	hap_v074	hap_v149	GG	2	NA	CC	NA	SINE/SINE
validation	control	dog_10191	GAAAAAAAGGAGGGGGGGAGGGGGCGAAGAAGGAGGGGAGGGGGAGGAGAAG	GAAAAAAAGGAGGGGGGGAGGGGGCGAAGAAGGAGGGGAGGGGGAGGAGAAG	hap_v023	hap_v023	GG	2	NA	CC	NA	SINE/SINE
validation	control	dog_10192	GAAAAAAAGGAGGGGGGGGGAGAGAGGAGAAGGGAAGAAGGGGGAGGAGCAG	GAAAAAGAGAGAGGGGGAAAAAGGAGGAAAAGGGGAGAAGAGGGAGGAACAG	hap_v130	hap_v115	GG	2	NA	CC	NA	SINE/-
validation	control	dog_10197	GAGAAAGAGAGAGGGAGGGGAGGGAGGGGAAGGGGAAAAGAGGGAGAAGCAG	AAAGAGAGAAGGGAGAGGAGAGGGAGGGGAAGGAGGGGAGAGGAAGGAACGG	hap_v058	hap_r58	GG	2	NA	CC	NA	SINE/-
validation	control	dog_10198	ATAGGGGAGGGAGGGGGGAGGGGGAGGAGCAGGGGAGAAGAGGGAGGAACAG	GAAGGGGAGGGGAGAAGGGGAGAGAGGGGAGGGGGAGAAGGGGGAGGAGCAG	hap_v159	hap_c26	GG	2	NA	CC	NA	SINE/SINE
validation	control	dog_10199	GAGAAAGAGAGAGAGAGGAGAGGGCAAGAAAGGGGAGAAGAGAGAGGAAAAG	GAAAAAAAGGAGGAGAGGGGAGAGAGGAGAAGGGGAGAAGGAGAAGGAACAG	hap_c22	hap_v025	GG	2	NA	CC	NA	SINE/-
validation	control	dog_10200	GAAGGGGAGAGAAGAAGGAGGGGGCGAAGAAGGAGGGGAGGGGGAGGAGCAG	AAAAAAAAGGAGGGGGGGAGGGGGAGGAGCAGGGGAGAAGAGGGAGGAACAG	hap_v079	hap_v174	GG	2	NA	CC	NA	SINE/-
validation	control	dog_10202	GAAGGGGAGGGGAGAAGGGGAGAGAGGGGAGGAAGAGAACGGGGAGGAGCGG	GAAAAAAAGGGGAGGGGGGGAGGGAGGGGCAGGGGAGAAGAGGGAGGAACAG	hap_v068	hap_v119	GG	2	NA	CC	NA	-/-
validation	control	dog_10205	GAGGGGGAGGGGAGAAGGAAGGGGAGGGGAAGGGGAAAACGAGGAGGAGCAG	GAAAAAAAGGAGGGGGGGAGGGGGAGGAGCAGGGGAGAAGAGGGAGGAACAG	hap_v043	hap_c211	GG	2	NA	CC	NA	-/-
validation	control	dog_10206	GAAGGGGAGAGAAGAAGGAGGGGGAGGGGAAGGGGAGAACGGGGAGAAGCAA	GAAAAAAAGGAGGGGGGGAGGGGGAGGAGCAGGGGAGAAGAGGGAGGAACAG	hap_v012	hap_c211	GG	2	NA	CC	NA	SINE/SINE
validation	control	dog_10209	GAAAAAGAGAGAGGGGGGGGAGAGAGGGGAAGGGGGGAACGGGGAGGAGCAA	GAAGAGAGAAGGGAAAGGAGAGGGAGGAAAAGAAGAGAAGAAGGAGGAGCAG	hap_v110	hap_v018	GG	2	NA	CC	NA	-/-
validation	control	dog_10210	ATAGGGGAGGGGAGAAGAAAGGAAAGGAGAAGGAGAAAACGGGGAGGAAAAG	GAAGGGGAGAGAAGAAGGAGGGAGAGGGGAAGGGAGGGACGGGGAGGAACAA	hap_c62	hap_c23	GG	2	NA	CC	NA	SINE/SINE
validation	control	dog_10211	GAAGGGGAGAGAAGAAGGGGAGAAAGGAAAAGGAGGGAAGGAGGAGGCACAA	GAAAAAAAGGAGGGGGGGGGAAGGAGGGGAAGGGGAAGAGAAGGAGGAGCAG	hap_v078	hap_r39	GG	2	NA	CC	NA	SINE/SINE
validation	control	dog_10212	GAGAAAGAGAGAGGGGGGGGAGGGCGAAGAAGGAGGGGAGGGGGAGGAGAAG	GAGAAAGAGAGAGGGGGGGGAGGGCGAAGAAGGAGGGGAGGGGGAGGAGAAG	hap_c130	hap_c130	GG	2	NA	CC	NA	SINE/SINE
validation	control	dog_10214	GAAGAGAGAAGAGGGGGGGGAGGGAGGAGAAGGAGAGAAGAGGGGAAAGCAG	GAAGGGGAGGGGAAGAGGAGAGGGAGGAAAAGGGGAGGGCGGGGAGGCGAAA	hap_v097	hap_v011	GG	2	NA	CC	NA	SINE/SINE
validation	control	dog_10215	ATAAAAAAGGAGGGGGGGGGAGGACGAGGAAGAGGGGAACGGGAAGAAACGG	ATAAAAAAGGAGGGGGGGGGAGGACGAGGAAGAGGGGAACGGGAAGAAACGG	hap_v029	hap_v029	GG	2	NA	CC	NA	SINE/SINE
validation	control	dog_10216	GAAGAGAGAAGGGAGAGGAGAGAGAGGAAAAGAAGAGGGCGAGGAGGAGCAG	ATAAAAGAGAGGGGGAGAAAGGGGAGGAGAAGGAGGGAAGGGGAAGGAACGG	hap_v017	hap_c09	GG	2	NA	CC	NA	SINE/SINE
validation	control	dog_10225	ATGAAAGAGAGAGGAAGGAGAAAGAGGGGAAGGGGAGAAGAGGGAGGAACAG	GAAGGGGAGGGGAGAAGGGGAGAGAGGAAAAGGAGGGAAGGAGGAGGCACAA	hap_v148	hap_v072	GG	2	NA	CC	NA	SINE/SINE
validation	control	dog_10230	GAAAAAAAGGAGGGGGGGGGAGGGCGAAAAAAAGGAGAAGAGAGAGAAGCAG	GAAGGGGAGAGAAGAAGGAGGGAGAGGGGAAGGGAGGGACGGGGAGGAACAA	hap_v122	hap_c23	GG	2	NA	CC	NA	-/-
validation	control	dog_10235	GAAAAAAAGGAGGGGGGGGGAGAACGAAGAAGGAGGGAAGGAGGAGGCGCAG	ATAAAGAAGAGAGGGGGGAGGGGGAGGAGAAGAGAAGAAGGGAGAGGAACAA	hap_v131	hap_v162	GG	2	NA	CC	NA	SINE/SINE
validation	control	dog_10238	AAAGAGAGAAGGGAGAGGAGAGGGAGGGGAAGGAGGGGAGGAGGAAGAGCGG	AAAGAGAGAAGGGAGAGGAGAGGGAGGGGAAGGAGGGGAGAGGGAGGAGCGG	hap_v032	hap_v172	GG	2	NA	CC	NA	SINE/-
validation	control	dog_10243	ATAAAAAAGGAGGGGGGGGGAGGGCGAAAAAAAGAAGGGGGGGGAAGAGCAG	ATAAAAAAGGAGGGGGGGGGAGGGCGAAAAAAAGAAGGGGGGGGAAGAGCAG	hap_r53	hap_r53	GG	2	NA	CC	NA	SINE/SINE
validation	control	dog_10247	GAAGAGAAGAGAGGGGGAGGAGAACGAAGAAGGAGGGAAGAGGGAGAAGAAA	ATGAAGAGGAGGAGAAGGAGAGGGCGAAGAAGGGGGGAAGGGGGAGGAGCGG	hap_v100	hap_v028	GG	2	NA	CC	NA	SINE/SINE
validation	control	dog_10255	GAGAAAGAGAGAGGGGGGGGAGGGCGAAGAAGGGGAGAAGAGGGAGGAACAG	GAGAAAGAGAGAGGGGGGGGAGGGCGAAGAAGGGGAGAAGAGGGAGGAACAG	hap_v008	hap_v008	GG	2	NA	CC	NA	SINE/SINE
validation	control	dog_10256	GAGAAAGAGGGAGGGGGGGAGGAGAGGGGAAGGGGAGAAGGAGAAGGAGCAG	GAAGAGAAGAGAGGGGGGAAGGAGAGGGGAAGGGGAGAAGAGGGAGGAACAG	hap_v049	hap_v099	GG	2	NA	CC	NA	SINE/SINE
validation	control	dog_10259	GAAGAGAGGAGAGGGGGGGGAGAGAGGGGAAGGAGGGGAGAGAGAGGAAAAG	GTGAAAAAGGGGAGGGGGGGGGGGAGGAAAAGAAGGGAAGGGGGAAGAGCGG	hap_v014	hap_v001	GG	2	NA	CC	NA	SINE/SINE
validation	control	dog_10261	GAAGAGAAGAGAGGAAGGGGAGAGAGGGGCAGGAGAGAAGAGGGAGGAGAAG	ATAGAAGAGAGGGGGGGAAAAGGGAGGGGAAGGGGAGAAGAGGGAGGAGCGG	hap_v104	hap_v004	GG	2	NA	CC	NA	SINE/-
validation	control	dog_10266	GAAGAGAAGAGAGGGGGAAGAGAGAGGGGAAGGAGAGAAGAGGGAGGAGCAG	GAAAAAAAGGAGGGGGGGAGGGGGAGGAGCAGGGGAGAAGAGGGAGGAACAG	hap_v102	hap_c211	GG	2	NA	CC	NA	SINE/SINE
validation	control	dog_10270	GAAAAAAAGGAGGGGGGGAGGGGGCGAAGAAGAAGAGAAGAGGGAGGAGCGG	GAGAAAGAGAGAGGGGGGAAGGGGAGGAGCAGGGGAGAAGAGGGAGGAACAG	hap_c210	hap_v056	GG	2	NA	CC	NA	SINE/-
validation	control	dog_10272	ATGAAAGAGAAAGGGGGGGGAGGGAGGAGAAGGAGAGAAGAGGGGAAAGCAG	ATGAAAGAGAAAGGGGGGGGAGGGAGGAGAAGGAGAGAAGGGGGAGGCGAAG	hap_v153	hap_v152	GG	2	NA	CC	NA	SINE/SINE
validation	control	dog_10275	GAAAAGAGGGGGGGGAGGAGAGAGAGGGGAAGAAGAGGGCGAGAAGGAGCAG	GAAGGGGAGGGGAAGAGGAGAGGGAGGAAAAGGGGAGGGCGGGGAGGCGAAA	hap_v020	hap_v011	GG	2	NA	CC	NA	SINE/SINE
validation	roan	dog_10001	ATAAAAAAGGAGGGGAAGGGAGGGAGAAAAAGGGAAGAAGGGGGAGGAACAA	ATAAAAAAGGAGGGGAAGGGAGGGAGAAAAAGGGAAGAAGGGGGAGGAACAA	hap_02	hap_02	AA	4	NA	TT	NA	SINE/SINE
validation	roan	dog_10002	ATAAAAAAGGAGGGGAAGGGAGGGAGAAAAAGGGAAGAAGGGGGAGGAACAA	ATAAAAAAGGAGGGGAAGGGAGGGAGAAAAAGGGGAGGACGGGGAGGAGAAG	hap_02	hap_03	AA	4	1	TT	NA	SINE/-
validation	roan	dog_10004	GAAGAGAGAAGGGAGAGGAGAGAGAGGAAAAGAAGAGAACGGGGAGGAGAAG	GAAAAAGAGAGAGGGGGGAAAGAGAGAAAAAGGGAAGAAGGGAGAGGAACAA	hap_c171	hap_GG01	GG	3	NA	TC	NA	SINE/SINE
validation	roan	dog_10006	ATAAAAAAGGAGGGGAAGGGAGGGAGAAAAAGGGAAGAAGGGGGAGGAACAA	GAAAAAAAGGGGGGGGGGAGGGGGAGGGGAAGAAGAGAAGAAGAAGGAGCAG	hap_02	hap_c01	AG	3	NA	TC	NA	SINE/SINE
validation	roan	dog_10007	ATAAAAAAGGAGGGGAAGGGAGGGAGAAAAAGGGGAGGACGGGGAGGAGAAG	ATAAAAAAGGAGGGGAAGGGAGGGAGAAAAAGGGGAGGACGGGGAGGAGAAG	hap_03	hap_03	AA	4	NA	TT	NA	SINE/-
validation	roan	dog_10012	GAAAAAGAGAGAGGGGGGAAAGAGAGAAAAAGGGAAGAAGGGAGAGGAACAA	GAAAAAGAGAGAGGGGGGAAAGAGAGAAAAAGGGAAGAAGGGAGAGGAACAA	hap_GG01	hap_GG01	GG	4	NA	TT	NA	SINE/SINE
validation	roan	dog_10015	ATAAAAAAGGAGGGGAAGGGAGGGAGAAAAAGGGAAGAAGGGAGAGGAACAA	ATAAAAAAGGAGGGGAAGGGAGGGAGAAAAAGGGAAGAAGGGAGAGGAACAA	hap_01	hap_01	AA	4	NA	TT	NA	SINE/SINE
validation	roan	dog_10016	ATAAAAAAGGAGGGGAAGGGAGGGAGAAAAAGGGAAGAAGGGGGAGGAACAA	GAGGGGGAGGGGAGAAGAAGGGGGCAAGAAAGGGGAGAAGAGAGAGGAAAAG	hap_02	hap_v045	AG	3	NA	TC	NA	SINE/SINE
validation	roan	dog_10033	ATAAAAAAGGAGGGGAAGGGAGGGAGAAAAAGGGGAGGACGGGGAGGAGAAG	ATAAAAAAGGAGGGGAAGGGAGGGAGAAAAAGGGGAGGACGGGGAGGAGAAG	hap_03	hap_03	AA	4	1	TT	TT	SINE/SINE
validation	roan	dog_10039	ATAAAAAAGGAGGGGAAGGGAGGGAGAAAAAGGGAAGAAGGGGGAGGAACAA	GAAGAGAGGAGAGGGGGGGGAGAGAGGGGAAGGGGAGGGGAGGGAGGAGCAG	hap_02	hap_r26	AG	3	1	TC	CT	SINE/SINE
validation	roan	dog_10041	GAAAAAGAGAGGGGGAGAAGGGGGAGGGGAGGGGGGGGAGAGGGAGGAACAG	ATAAAAAAGGAGGGGAAGGGAGGGAGAAAAAGGGGAGGACGGGGAGGAGAAG	hap_c49	hap_03	AG	3	0	TC	CC	SINE/-
validation	roan	dog_10051	ATAAAAAAGGAGGGGAAGGGAGGGAGAAAAAGGGGAGGACGGGGAGGAGAAG	ATAAAAAAGGAGGGGAAGGGAGGGAGAAAAAGGGAAGAAGGGGGAGGAACAA	hap_03	hap_02	AA	4	NA	TT	NA	SINE/SINE
validation	roan	dog_10052	ATAAAAAAGGAGGGGAAGGGAGGGAGAAAAAGGGAAGAAGGGGGAGGAACAA	ATAAAAAAGGAGGGGAAGGGAGGGAGAAAAAGGGGAGGACGGGGAGGAGAAG	hap_02	hap_03	AA	4	NA	TT	NA	-/-
validation	roan	dog_10063	ATAAAAAAGGAGGGGAAGGGAGGGAGAAAAAGGGGAGGACGGGGAGGAGAAG	GAAAAAGAGAGAGGGGGGAAAGAGAGAAAAAGGGAAGAAGGGAGAGGAACAA	hap_03	hap_GG01	AG	4	NA	TT	NA	SINE/SINE
validation	roan	dog_10070	ATAAAAAAGGAGGGGAAGGGAGGGAGAAAAAGGGAAGAAGGGGGAGGAAAAG	ATAAAAAAGGAGGGGAAGGGAGGGAGAAAAAGGGGAGGACGGGGAGGAGAAG	hap_v167	hap_03	AA	4	NA	TT	NA	SINE/-
validation	roan	dog_10073	ATAAAAAAGGAGGGGAAGGGAGGGAGAAAAAGGGAAGAAGGGGGAGGAACAA	GAAAAAGAGAGGGGGAGGGGAGGGAGGAGAAGAGGAGGACGGGGAGGAGCAG	hap_02	hap_c05	AG	3	1	TC	NA	SINE/SINE
validation	roan	dog_10090	ATAAAAGAGAGGGGGAGAAAGGGGAGGAGAAGGAGGGAAGGGGAAGGAACGG	ATAAAAAAGGAGGGGAAGGGAGGGAGAAAAAGGGAAGAAGGGGGAGGAACAA	hap_c09	hap_02	AG	3	NA	TC	NA	SINE/-
validation	roan	dog_10092	GAAAAAGAGAGAGGGGGGAAAGAGAGAAAAAGGGAAGAAGGGAGAGGAACAA	ATAAAAAAGGAGGGGAAGGGAGGGAGAAAAAGGGAAGAAGGGGGAGGAACAA	hap_GG01	hap_02	AG	4	NA	TT	NA	SINE/SINE
validation	roan	dog_10097	ATAAAAAAGGAGGGGAAGGGAGGGAGAAAAAGGGAAGAAGGGAGAGGAAAAG	GAAAAAGAGAGGGGGAGGGGAGGGAGGGGAAGGGGAGGGCGAGAAGGAGCGG	hap_04	hap_c86	AG	3	1	TC	NA	SINE/-
validation	roan	dog_10101	GAAAAAAAGGAGGGGGGGAGGGGGAGGAGCAGGGGAGAAGAGGAAGGAACGG	ATAAAAAAGGAGGGGAAGGGAGGGAGAAAAAGGGGAGGACGGGGAGGAGAAG	hap_r40	hap_03	AG	3	NA	TC	NA	SINE/SINE
validation	roan	dog_10118	AAAGGGAGGAAGGGGAGAAGAGGGCGGAAAAGGAGGAAAGGGGGAAGAACAA	ATAAAAAAGGAGGGGAAGGGAGGGAGAAAAAGGGGAGGACGGGGAGGAGAAG	hap_v031	hap_03	AG	3	NA	TC	NA	SINE/-
validation	roan	dog_10142	GAGAAGAAGGGGAGAAGGAAGAGGAGGAAAAGGGGAGGACGGGGAGGAGAAG	ATAAAAAAGGAGGGGAAGGGAGGGAGAAAAAGGGAAGAAGGGAGAGGAAAAG	hap_v048	hap_04	AG	3	NA	TC	NA	SINE/SINE
validation	roan	dog_10144	ATAAAAAAGGAGGGGAAGGGAGGGAGAAAAAGGGAAGAAGGGAGAGGAACAA	ATAAAAAAGGAGGGGAAGGGAGGGAGAAAAAGGGGAGGACGGGGAGGAACAA	hap_01	hap_08	AA	4	NA	TT	NA	SINE/SINE
validation	roan	dog_10148	ATAAAAAAGGAGGGGAAGGGAGGGAGAAAAAGGGGAGGACGGGGAGGAGAAG	ATAAAAAAGGAGGGGAAGGGAGGGAGAAAAAGGGGAGGACGGGGAGGAGAAG	hap_03	hap_03	AA	4	NA	TT	NA	SINE/SINE
validation	roan	dog_10167	ATAAAAAAGGAGGGGAAGGGAGGGAGAAAAAGGGGAGGACGGGGAGGAGAAG	GAGAAAGAGAGAGGGGGGAAGGGGAGGAGCAGGGGAGAAGAGGGAGGAGCAG	hap_03	hap_c140	AG	3	NA	TC	NA	SINE/-
validation	roan	dog_10169	GAAAAAAAGGGGGGGGGGAGGGGGAGGGGAAGAAGAGAAGAAGAAGGAGCAG	ATAAAAAAGGAGGGGAAGGGAGGGAGAAAAAGGGAAGAAGGGGGAGGAACAA	hap_c01	hap_02	AG	3	NA	TC	NA	SINE/-
validation	roan	dog_10181	ATGAAAGAGAAAGAGAGGAGAGGGAGGAAAAGGGGAGAAGAGGGAGGAGCAG	ATAAAAAAGGAGGGGAAGGGAGGGAGAAAAAGGGGAGGACGGGGAGGAGAAG	hap_c27	hap_03	AG	3	NA	TC	NA	SINE/SINE
validation	roan	dog_10184	GAAGAGAGAAGGGAAAGGAGAGGGAGGAAAAGAAGAGAAGAAGGAGGAGCAG	ATAAAAAAGGAGGGGAAGGGAGGGAGAAAAAGGGAAGAAGGGAGAGGAACAA	hap_v018	hap_01	AG	3	NA	TC	NA	SINE/SINE
validation	roan	dog_10193	ATAAAAAAGGAGGGGAAGGGAGGGAGAAAAAGGGAAGAAGGGGGAGGAACAA	GAAAAAGAGAGGGGAAGGAGGGAAAGGAGAAGGGGAGAAGGGGAAGGAGCAG	hap_02	hap_c02	AG	3	NA	TC	NA	SINE/-
validation	roan	dog_10196	ATAAAAAAGGAGGGGAAGGGAGGGAGAAAAAGGGGAGGACGGGGAGGAGAAG	GAAGAGAGGAGAGGGGGGGGAGAGAGGAGAAGGGGAGGGCGAGAAGGAGCAG	hap_03	hap_v092	AG	3	1	TC	NA	SINE/SINE
validation	roan	dog_10267	ATAAAAAAGGAGGGGAAGGGAGGGAGAAAAAGGGGAGGACGGGGAGGAGAAG	ATAAAAGAGAGGGGGAGAAAGGGGAGGAGAAGGAGGGAAGAGGGAGGAGCGG	hap_03	hap_v163	AG	3	NA	TC	NA	SINE/-
validation	roan	dog_10005	ATAAAAAAGGAGGGGAAGGGAGGGAGAAAAAGGGAAGAAGGGGGAGGAACAA	ATAAAAAAGGAGGGGAAGGGAGGGAGAAAAAGGGAAGAAGGGGGAGGAACAA	hap_02	hap_02	AA	4	NA	TT	NA	SINE/SINE
validation	roan	dog_10020	ATAAAAAAGGAGGGGAAGGGAGGGAGAAAAAGGGGAGGACGGGGAGGAGAAG	GAAAAAAAGGAGGGGGGGAGGGGGAGGAGCAGGGGAGAAGAGGGAGGAACAG	hap_03	hap_c211	AG	3	NA	TC	NA	SINE/-
validation	roan	dog_10034	GAAAAAGAGAGAGGGGGGAAAGAGAGAAAAAGGGAAGAAGGGAGAGGAACAA	ATAAAAAAGGAGGGGAAGGGAGGGAGAAAAAGGGGAGGACGGGGAGGAGAAG	hap_GG01	hap_03	AG	4	NA	TT	NA	SINE/SINE
validation	roan	dog_10036	ATAAAAAAGGAGGGGAAGGGAGGGAGAAAAAGGGGAGGACGGGGAGGAGAAG	GAGAAAGAGGGAGGGAGGGAGGAGAGGGGAAAGGGGAAACGGGGAGGAACAG	hap_03	hap_c11	AG	3	NA	TC	NA	SINE/-
validation	roan	dog_10043	GAAAAAGAGAGAGGGGGGAAAGAGAGAAAAAGGGAAGAAGGGAGAGGAACAA	ATAAAAAAGGAGGGGAAGGGAGGGAGAAAAAGGGAAGAAGGGAGAGGAAAAG	hap_GG01	hap_04	AG	4	NA	TT	NA	SINE/-
validation	roan	dog_10088	ATAAAAAAGGAGGGGAAGGGAGGGAGAAAAAGGGGAGGACGGGGAGGAGAAG	GAAAAAGAGAGAGGGGGGAAAGAGAGAAAAAGGGGAGGACGGGGAGGAGAAG	hap_03	hap_v111	AG	4	NA	TT	NA	SINE/SINE
validation	roan	dog_10154	GAAAAAGAGAGAGGGGGGAAAGAGAGAAAAAGGGAAGAAGGGAGAGGAACAA	GTAAAAAAGGAGGGGAAGGGAGGGAGAAAAAGGGAAGAAGGGAGAGGAGAAG	hap_GG01	hap_v040	AG	4	NA	TT	NA	SINE/SINE
validation	roan	dog_10224	GAGAAAGAGGGAGGGGGGGAGGAGAGGAAAAGGAGAGAAGGGGGAGGAGCAG	ATAAAAAAGGAGGGGAAGGGAGGGAGAAAAAGGGAAGAAGGGGGAGGAACAA	hap_v050	hap_02	AG	3	NA	TC	NA	SINE/SINE
validation	roan	dog_10226	ATAAAAAAGGAGGGGAAGGGAGGGAGAAAAAGGGGAGGACGGGGAGGAGAAG	ATAAAAAAGGAGGGGAAGGGAGGGAGAAAAAGGGGAGGACGGGGAGGAGAAG	hap_03	hap_03	AA	4	NA	TT	NA	SINE/SINE
validation	roan	dog_10227	ATAAAAAAGGAGGGGAAGGGAGGGAGAAAAAGGGAAGAAGGGGGAGGAACAA	GAAAAAAAGGAGGGGGGGGGAGGGCGAAGAAGGAGGGGAGGGGGAGGAGAAG	hap_02	hap_c10	AG	3	1	TC	NA	SINE/SINE
validation	roan	dog_10234	ATAAAAAAGGAGGGGAAGGGAGGGAGAAAAAGGGGAGGACGGGGAGGAGAAG	ATAAAAAAGGAGGGGGGGGGAGAACGAAGCAAGGAGGGGCGGGGAGGAACAG	hap_03	hap_c100	AG	3	NA	TC	NA	SINE/SINE
validation	roan	dog_10236	GAAGAGGAGAGAGGGGGGGGAGAGAGGAAAAGAAGGGAAGAGGGAGGAGCAG	ATAAAAAAGGAGGGGAAGGGAGGGAGAAAAAGGGAAGAAGGGGGAGGAACAA	hap_v090	hap_02	AG	3	NA	TC	NA	SINE/SINE
validation	roan	dog_10237	GAAGAGAGAAGGGGGAGGAGAGGGAGGGGAAGGGGAGGGCGAGAAGGAGCGG	ATAAAAAAGGAGGGGAAGGGAGGGAGAAAAAGGGAAGAAGGGGGAGGAACAA	hap_v094	hap_02	AG	3	NA	TC	NA	SINE/-
validation	roan	dog_10239	ATAAAAAAGGAGGGGAAGGGAGGGAGAAAAAGGGAAGAAGGGGGAGGAACAA	ATAAAAAAGGAGGGGAAGGGAGGGAGAAAAAGGGAAGAAGGGGGAGGAACAA	hap_02	hap_02	AA	4	NA	TT	NA	SINE/-
validation	roan	dog_10242	ATAAAAAAGGAGGGGAAGGGAGGGAGAAAAAGGGAAGAAGGGGGAGGAACAA	GAAAAAGAGAGGGGAAGGAGGGAAAGGAGAAGGGGAGAAGGGGAAGGAGCAG	hap_02	hap_c02	AG	3	NA	TC	NA	SINE/SINE
validation	roan	dog_10246	GAAAAAGAGAGGGGGAGGGGAGGGAGGAGAAGAGGAGGACGGGGAGGAGCAG	ATAAAAAAGGAGGGGAAGGGAGGGAGAAAAAGGGGAGGACGGGGAGGAGAAG	hap_c05	hap_03	AG	3	NA	TC	NA	SINE/-
validation	roan	dog_10263	ATAAAAAAGGAGGGGAAGGGAGGGAGAAAAAGGGGAGGACGGGGAGGAGAAG	GAAAAAGAGAGGGGAAGGAGGGAAAGGAGAAGGGGAGAAGGGGAAGGAGCAG	hap_03	hap_c02	AG	3	NA	TC	NA	SINE/-
validation	roan	dog_10008	GAGAAAGAGAGAGGGAGGAGAGGGAGGGGAAGGAGGGGAGAGGGAGGAGCGG	GAAAAAGAGAGAGGGGGGAAAGAGAGAAAAAGGGAAGAAGGGAGAGGAACAA	hap_v059	hap_GG01	GG	3	NA	TC	NA	SINE/SINE
validation	roan	dog_10018	ATAAAAAAGGAGGGGAAGGGAGGGAGAAAAAGGGGAGGACGGGGAGGAGAAG	GAAGAGAAGAGAGGGGGAAAAGAGAGGGGAAGGAGGGGAGGGGGAGGAGAAG	hap_03	hap_v103	AG	3	NA	TC	NA	SINE/SINE
validation	roan	dog_10029	ATAGGGGAGGGGAGAAGAAAAGAGAGGAAAAGGGGAGAAGAGGGAGGAGCGG	ATAAAAAAGGAGGGGAAGGGAGGGAGAAAAAGGGAAGAAGGGGGAGGAACAA	hap_v003	hap_02	AG	3	NA	TC	NA	SINE/SINE
validation	roan	dog_10031	ATAAAAAAGGAGGGGAAGGGAGGGAGAAAAAGGGAAGAAGGGAGAGGAACAA	ATAAAAAAGGAGGGGAAGGGAGGGAGAAAAAGGGAAGAAGGGGGAGGAACAA	hap_01	hap_02	AA	4	NA	TT	NA	SINE/SINE
validation	roan	dog_10040	GTGAAAGAGAGAGGGGGGAGAAGGAGGAGAAGGAGGGGAGGGGGAGGAGCAA	ATAAAAAAGGAGGGGAAGGGAGGGAGAAAAAGGGGAGGACGGGGAGGAGAAG	hap_r07	hap_03	AG	3	NA	0	NA	SINE/SINE
validation	roan	dog_10050	GAAAAAAAGGAGGGGGGGGGAGAACGAGGAAGGGGAAGAGAGGGAGGAGCAG	ATAAAAAAGGAGGGGAAGGGAGGGAGAAAAAGGGAAGAAGGGAGAGGAACAA	hap_c207	hap_01	AG	3	NA	TC	NA	SINE/SINE
validation	roan	dog_10054	ATAAAAAAGGAGGGGAAGGGAGGGAGAAAAAGGGAAGAAGGGAGAGGAACAA	ATAAAAAAGGAGGGGAAGGGAGGGAGAAAAAGGGAAGAAGGGGGAGGAACAA	hap_01	hap_02	AA	4	NA	TT	NA	SINE/SINE
validation	roan	dog_10057	ATAAAAAAGGAGGGGAAGGGAGGGAGAAAAAGGGAAGAAGGGAGAGGAACAA	GAAGGGGAGGGGAGGAGGAGAAGGAGGAGAAAGGGAGAAGGGGGAGGCGAAG	hap_01	hap_c150	AG	3	1	TC	NA	SINE/SINE
validation	roan	dog_10058	GAAGAGAGAAGGGGGGGGGGAGGGCGAAAAAGGGAGGGACAGGGAGGAAAAA	ATAAAAAAGGAGGGGAAGGGAGGGAGAAAAAGAAGAAAACGAGAAGGAGCAG	hap_v015	hap_v169	AG	3	NA	TC	NA	SINE/SINE
validation	roan	dog_10059	ATAAAAAAGGAGGGGAAGGGAGGGAGAAAAAGGGGAGGACGGGGAGGAGAAG	ATAAAAAAGGAGGGGAAGGGAGGGAGAAAAAGGGGAGGACGGGGAGGAGAAG	hap_03	hap_03	AA	4	NA	TT	NA	SINE/SINE
validation	roan	dog_10062	GAAAAAGAGAGAGGGGGGAAAGAGAGAAAAAGGGAAGAAGGGAGAGGAACAA	ATAAAAAAGGAGGGGAAGGGAGGGAGAAAAAGGGAAGAAGGGAGAGGAAAAG	hap_GG01	hap_04	AG	4	NA	TT	NA	SINE/SINE
validation	roan	dog_10066	ATAAAAAAGGAGGGGAAGGGAGGGAGAAAAAGGGGAGGACGGGGAGGAGAAG	GAAGAGAGGAGAGGGGGGGGAGAGCGGGGAAGGAGGGGAGAGAGAGGAAAAG	hap_03	hap_v091	AG	3	NA	TC	NA	SINE/SINE
validation	roan	dog_10067	GAAGAGAGAAGGGAGAGGAGAGGGCGAAGCAGGAGGGAAGAGGGAGGAGCAG	ATAAAAAAGGAGGGGAAGGGAGGGAGAAAAAGGGAAGAAGGGGGAGGAACAA	hap_v016	hap_02	AG	3	NA	TC	NA	SINE/SINE
validation	roan	dog_10068	GTAGGGGAGGGGAGAAGGAGAGAGAGGGGAAGGGGGGGAGGGGGAGGAACAA	ATAAAAAAGGAGGGGAAGGGAGGGAGAAAAAGGGAAGAAGGGAGAGGAACAA	hap_v005	hap_01	AG	3	NA	TC	NA	-/-
validation	roan	dog_10072	GAGAAAGAGAGAGGGGGGGGAAGGAGGGGAAAGGAAGAAGAGGGAGGAGAAG	ATAAAAAAGGAGGGGAAGGGAGGGAGAAAAAGGGAAGAAGGGAGAGGAACAA	hap_c33	hap_01	AG	3	NA	TC	NA	SINE/-
validation	roan	dog_10076	ATAAAAAAGGAGGGGAAGGGAGGGAGAAAAAGGGAAGAAGGGAGAGGAAAAG	ATAAAAAAGGAGGGGAAGGGAGGGAGAAAAAGGGAAGAAGGGGGAGGAACAA	hap_04	hap_02	AA	4	NA	TT	NA	SINE/SINE
validation	roan	dog_10078	ATAAAAAAGGAGGGGAAGGGAGGGAGAAAAAGGGGAGGACGGGGAGGAGAAG	ATAAAAAAGGAGGGGAAGGGAGGGAGAAAAAGGGAAGAAGGGAGAGGAACAA	hap_03	hap_01	AA	4	NA	TT	NA	SINE/SINE
validation	roan	dog_10080	ATAAAAAAGGAGGGGAAGGGAGGGAGAAAAAGGGGAGGACGGGGAGGAGAAG	GAAAAAGAGAGAGGGGGGAAAGAGAGAAAAAGGGAAGAAGGGAGAGGAAAAG	hap_03	hap_v112	AG	4	NA	TT	NA	SINE/SINE
validation	roan	dog_10082	ATAAAAAAGGAGGGGAAGGGAGGGAGAAAAAGGGAAGAAGGGGGAGGAACAA	GAAAAAGAGAGAGGGGGAAAAAGGAGGGGAAAGGAAGAAGAGGGAGGAGCGG	hap_02	hap_c21	AG	3	1	TC	NA	SINE/SINE
validation	roan	dog_10084	ATAAAAAAGGAGGGGAAGGGAGGGAGAAAAAGGGAAGAAGGGGGAGGAACAA	GAAAAAAAGGAGGGGGGGAGGAGGAGGGGAAGGGGGAAAGAGGGAGGAGCAG	hap_02	hap_v137	AG	3	NA	TC	NA	SINE/SINE
validation	roan	dog_10085	ATAAAAAAGGAGGGGAAGGGAGGGAGAAAAAGGGAAGAAGGGAGAGGAACAA	ATGAAAGAGGGGGGGAGGAGAGGGAGGAAAAGAAGAGAACGGGGAGGAGCGG	hap_01	hap_c28	AG	3	1	TC	NA	SINE/SINE
validation	roan	dog_10098	ATAAAAAAGGAGGGGAAGGGAGGGAGAAAAAGGGAAGAAGGGAGAGGAACAA	ATAAAAAAGGAGGGGAAGGGAGGGAGAAAAAGGGAAGAAGGGAGAGGAACAA	hap_01	hap_01	AA	4	NA	TT	NA	SINE/SINE
validation	roan	dog_10109	ATAAAAAAGGAGGGGAAGGGAGGGAGAAAAAGGGAAGAAGGGGGAGGAACAA	ATAAAAAAGGAGGGGAAGGGAGGGAGAAAAAGGGGAGGACGGGGAGGAGAAG	hap_02	hap_03	AA	4	NA	TT	NA	SINE/SINE
validation	roan	dog_10112	GAAGGGGAGGGGAGGAAGGGAGGGAGAAAAAGGGAAGAAGGGAGAGGAACAA	GAAGAGAGAAGGGAGAGGAGAGGGCGAAGCAGAAGAAAAGGGGGAGGAGCAG	hap_07	hap_c168	AG	3	NA	TC	NA	SINE/SINE
validation	roan	dog_10117	ATAAAAAAGGAGGGGAAGGGAGGGAGAAAAAGGGGAGGACGGGGAGGAGCAA	ATAAAAAAGGAGGGGAAGGGAGGGAGAAAAAGGGAAGAAGGGGGAGGAACAA	hap_v030	hap_02	AA	4	NA	TT	NA	SINE/SINE
validation	roan	dog_10119	GAAGGGGAGAGAAGAAGAAAAGAGAGGAAAAGGAGGGAACGGGAAGAAACAA	ATAAAAAAGGAGGGGAAGGGAGGGAGAAAAAGGGAAGAAGGGGGAGGAACAA	hap_v083	hap_02	AG	3	NA	TC	NA	SINE/SINE
validation	roan	dog_10120	GAAAAAAAGGAGGGGGGGGGAGGGAGGAAAAGGAGGGAAGGAGGAGGCACAA	GAGAAAGAGAGAGGGGGGGGAAGGAGGGGAAAGGAAGAAGAGGGAGGAGAAG	hap_GG02	hap_c33	GG	3	NA	TC	NA	SINE/SINE
validation	roan	dog_10121	ATAAAAAAGGAGGGGAAGGGAGGGAGAAAAAGGGGAGGACGGGGAGGAGAAG	GAAAAAGAGAGAGGGAGAGAAGGGAGGAGCAGGGGAGAAGAGGGAGGAACAG	hap_03	hap_v116	AG	3	1	TC	NA	SINE/SINE
validation	roan	dog_10122	GAAAAAAAGGAGGGGAAGGGAGGGAGAAAAAGGGAAGAAGGGAGAGGAACAA	GAGGGGGAGGGGAGAAGGAAGGGGAGGAAAGGGAGAGAAGAAGGAGGAACAA	hap_06	hap_v044	AG	3	NA	TC	NA	SINE/-
validation	roan	dog_10123	ATAAAAAAGGAGGGGAAGGGAGGGAGAAAAAGGGGAGGACGGGGAGGAGAAG	GAAAGGAAGGGGGGGGGGGGAGGGAGGGGAAGGGGAGAAGAGGGGAAAGCAA	hap_03	hap_v019	AG	3	1	TC	NA	SINE/SINE
validation	roan	dog_10125	GAGAAGAAGGGGAGAAGGAGGAGGAGGGGAAGGGGGAAAGAGGGAGGAGCAG	ATAAAAAAGGAGGGGAAGGGAGGGAGAAAAAGGGAAGAAGGGAGAGGAACAA	hap_v047	hap_01	AG	3	NA	TC	NA	SINE/-
validation	roan	dog_10127	GAAGGGGAGAGAAGAAGGAGGGAGAGGGGAAGGGAGGGACGGGGAGGAACAA	ATAAAAAAGGAGGGGAAGGGAGGGAGAAAAAGGGAAGAAGGGGGAGGAACAA	hap_c23	hap_02	AG	3	NA	TC	NA	SINE/SINE
validation	roan	dog_10130	GAAGGGGAGGGGAGAAGGGGAGGGAGGAGCAGGGGGGAAGAGGGAGGAGCAG	ATAAAAAAGGAGGGGAAGGGAGGGAGAAAAAGGGAAGAAGGGAGAGGAGCGG	hap_v064	hap_v168	AG	3	NA	TC	NA	SINE/SINE
validation	roan	dog_10133	GAAAAAAAGGAGGGGAAGGGAGGGAGAAAAAGGGAAGAAGGGAGAGGAACAA	GAAAAAAAGGAGGGGAAGGGAGGGAGAAAAAGGGAAGAAGGGAGAGGAACAA	hap_06	hap_06	AA	4	NA	TT	NA	SINE/SINE
validation	roan	dog_10134	ATAAAAAAGGAGGGGAAGGGAGGGAGAAAAAGGGGAGGACGGGGAGGAGAAG	GAAGGGGAGGGGAGAAGGGGAGAGAGGAGAAGGAGGGAAGGGGGAGGCGAAG	hap_03	hap_v071	AG	3	1	TC	NA	SINE/SINE
validation	roan	dog_10135	ATGAAGAAGGGGAGAAGGAAAAAACAAGAAAGGGGAGGGCGGGGAGGAGCAG	ATAAAAAAGGAGGGGAAGGGAGGGAGAAAAAGGGAAGAAGGGAGAGGAACAA	hap_c94	hap_01	AG	3	NA	TC	NA	SINE/SINE
validation	roan	dog_10139	GAGAAAGAGAGAGGGGGGGGAGAGAGGGGCAGGAGAGAAGGGGGAGGCACAG	GAAAAAAAGGAGGGGAAGGGAGGGAGAAAAAGGGAAGAAGGGAGAGGAACAA	hap_v054	hap_06	AG	3	NA	TC	NA	SINE/SINE
validation	roan	dog_10145	ATAAAAAAGGAGGGGAAGGGAGGGAGAAAAAGGGGAGGACGGGGAGGAGAAG	GAAGAGAGAAGGGGGGGGAGAAAAAGGGGAAGGGGGGGAGGGGGAGGAGAAG	hap_03	hap_c46	AG	3	NA	TC	NA	-/-
validation	roan	dog_10161	GAAAAAAAGAGGGGGGGGAGGGGGAGGGGAAGAAGAGAAGAAGAAGGAGCAG	ATAAAAAAGGAGGGGAAGGGAGGGAGAAAAAGGGAAGAAGGGAGAGGAAAAG	hap_c12	hap_04	AG	3	NA	TC	NA	SINE/SINE
validation	roan	dog_10162	GAAAAAAAGGAGGGGGGGGGAGGGAGAAAAAGGGGAGGGCGAGAAGGAGCGG	GAAAAAAAGGAGGGGGGGGGAGGGAGAAAAAGGGGAGGGCGAGAAGGAGCGG	hap_v022	hap_v022	GG	4	1	TT	NA	SINE/SINE
validation	roan	dog_10165	AAAGAGAGAAGGGAGAGGAGAGGGAGGGGAAGGAGGGGAGAGGAAGGAACGG	ATAAAAAAGGAGGGGAAGGGAGGGAGAAAAAGGGAAGAAGGGGGAGGAACAA	hap_r58	hap_02	AG	3	NA	TC	NA	SINE/SINE
validation	roan	dog_10168	GAAAAAAAGGAGGGGGGGAGAGGGAGGGGAAGAGGAGAAGAGGAAGGAGAAA	ATAAAAAAGGAGGGGAAGGGAGGGAGAAAAAGGGAAGAAGGGAGAGGAAAAG	hap_v138	hap_04	AG	3	NA	TC	NA	SINE/SINE
validation	roan	dog_10171	GAAGAGAAGAGAGGGGGGGGAGGGAGGAGAAGGAGGGAAGAGGGAGGAGCAG	ATAAAAAAGGAGGGGAAGGGAGGGAGAAAAAGGGAAGAAGGGGGAGGAACAA	hap_v098	hap_02	AG	3	NA	TC	NA	SINE/SINE
validation	roan	dog_10173	GAGAAAGAGAGAGGGGGGGGAGAGAGGGGCAGGAGGGAAGGGGGAGGAGCAG	GAAAAAGAGAGAGGGGGGAAAGAGAGAAAAAGGGAAGAAGGGAGAGGAACAA	hap_GG03	hap_GG01	GG	3	NA	TC	NA	SINE/SINE
validation	roan	dog_10188	GAAGGGGAGAGAAGAAGGAGGGAGAGGGGAAGGGGAGAAGAGGGGAAAGCAG	ATAAAAAAGGAGGGGAAGGGAGGGAGAAAAAGGGAAGAAGGGAGAGGAAAAG	hap_c154	hap_04	AG	3	NA	TC	NA	SINE/-
validation	roan	dog_10190	GAAAAAAAGGAGGGGGGGAGGGGGAGGAGCAGGGGAGAAGAGGGAGGAACAG	ATAAAAAAGGAGGGGAAGGGAGGGAGAAAAAGGGAAGAAGGGAGAGGAACAA	hap_c211	hap_01	AG	3	NA	TC	NA	SINE/SINE
validation	roan	dog_10194	GAGAAAGAGAGGGGGGGAAAAGGGAGGGGAAGAAGAAAACGAGAAGGAGCAG	ATAAAAAAGGAGGGGAAGGGAGGGAGAAAAAGGGAAGAAGGGAGAGGAACAA	hap_c71	hap_01	AG	3	NA	TC	NA	SINE/SINE
validation	roan	dog_10203	GTAGGGAGGGAAGGGAGGGGAGGGAGGAGCAGGAGAGAAGGGGGAGGAGCAG	ATAAAAAAGGAGGGGAAGGGAGGGAGAAAAAGGGGAGGACGGGGAGGAGAAG	hap_v037	hap_03	AG	3	NA	TC	NA	SINE/SINE
validation	roan	dog_10207	ATAAAAAAGGAGGGGAAGGGAGGGAGAAAAAGGGAAGAAGGGGGAGGAACAA	GAAAAAGAGAGAGGGGGGAAAGAGAGAAAAAGGGAAGAAGGGAGAGGAACAA	hap_02	hap_GG01	AG	4	NA	TT	NA	SINE/SINE
validation	roan	dog_10208	ATAAAAAAGGAGGGGAAGGGAGGGAGAAAAAGGGAAGAAGGGAGAGGAACAA	ATAAAAAAGGAGGGGAAGGGAGGGAGAAAAAGGGGAGGACGGGGAGGAGAAG	hap_01	hap_03	AA	4	NA	TT	NA	SINE/SINE
validation	roan	dog_10213	ATAAAAAAGGAGGGGAAGGGAGGGAGAAAAAGGGAAGAAGGGAGAGGAAAAG	ATAGGGGAGGGGAGAAGAAAGGAAAGGAGAAGGAGAAAACGGAGAGGAACAA	hap_04	hap_v157	AG	3	NA	TC	NA	SINE/SINE
validation	roan	dog_10221	GAAAAAAGGGGGGGGAGAAAAGGGAGGGGAAGGGGAGAAGAGGGAGAAGCGG	ATAAAAAAGGAGGGGAAGGGAGGGAGAAAAAGGGAAGAAGGGAGAGGAAAAG	hap_v117	hap_04	AG	3	NA	TC	NA	SINE/SINE
validation	roan	dog_10229	ATAAAAAAGGAGGGGAAGGGAGGGAGAAAAAGGGAAGAAGGGGGAGGAACAA	ATGAAGAGGAGGAGAAGGAGAGGGCGAAGAAGGGGGGAAGGGGGAGGAGCGG	hap_02	hap_v028	AG	3	NA	TC	NA	SINE/SINE
validation	roan	dog_10231	GAAGGGGAGGGGAGAAGGGGAGAGAGGGGCAGGAGAGAAGGGGGAGGCGCAG	ATAAAAAAGGAGGGGAAGGGAGGGAGAAAAAGGGAAGAAGGGAGAGGAACAA	hap_v065	hap_01	AG	3	NA	TC	NA	SINE/-
validation	roan	dog_10232	ATAAAAAAGGAGGGGAAGGGAGGGAGAAAAAGGGAAGAAGGGGGAGGAACAA	ATAAAAAAGGAGGGGAAGGGAGGGAGAAAAAGGGAAGAAGGGGGAGGAACAA	hap_02	hap_02	AA	4	NA	TT	NA	SINE/SINE
validation	roan	dog_10240	ATAAAAAAGGAGGGGAAGGGAGGGAGAAAAAGGGGAGAAGGGGGAGGAACAG	GAGAAAAGGGGGGGGGGGGGAGAGAGGGGAAGGAGAGAACGGGGAGGAGCGG	hap_v166	hap_v061	AG	3	1	TC	NA	SINE/SINE
validation	roan	dog_10241	GTAGGGAAGGGGAGAAGGAGGGAAAGGAGCAGGAGGAAAGGGGGAGGAAAAG	ATAAAAAAGGAGGGGAAGGGAGGGAGAAAAAGGGAAGAAGGGGGAGGAACAA	hap_v039	hap_02	AG	3	NA	TC	NA	-/-
validation	roan	dog_10244	ATAAAAAAGGAGGGGAAGGGAGGGAGAAAAAGGGGAGGACGGGGAGGAGCAA	GAAAAAGAGAGAGGGGGGAAAGAGAGAAAAAGGGAAGAAGGGAGAGGAACAA	hap_v030	hap_GG01	AG	4	NA	TT	NA	SINE/SINE
validation	roan	dog_10245	GAGAAAGAGAGGGGGGGGGGAGGGAGGAAAAGGGGAGAAGGGGGAGAAGCAG	ATAAAAAAGGAGGGGAAGGGAGGGAGAAAAAGGGAAGAAGGGAGAGGAACAA	hap_c119	hap_01	AG	3	NA	TC	NA	SINE/SINE
validation	roan	dog_10248	ATAAAAAAGGAGGGGAAGGGAGGGAGAAAAAGGGAAGAAGGGGGAGGAACAA	ATAAAAAAGGAGGGGAAGGGAGGGAGAAAAAGGGGAGGACGGGGAGGAGAAG	hap_02	hap_03	AA	4	NA	TT	NA	SINE/SINE
validation	roan	dog_10249	GAAAAAAAGGAGGGGGGGAGGGGGAGGAGCAGGGGAGAAGAGGGAGGAACAG	ATAAAAAAGGAGGGGAAGGGAGGGAGAAAAAGGGAAGAAGGGGGAGGAACAA	hap_c211	hap_02	AG	3	NA	TC	NA	SINE/SINE
validation	roan	dog_10250	ATAAAAAAGGAGGGGAAGGGAGGGAGAAAAAGGGAAGAAGGGGGAGGAACAA	ATAAAAAAGGAGGGGAAGGGAGGGAGAAAAAGGGAAGAAGGGGGAGGAACAA	hap_02	hap_02	AA	4	NA	TT	NA	SINE/-
validation	roan	dog_10251	ATAAAAAAGGAGGGGAAGGGAGGGAGAAAAAGGGGAGGACGGGGAGGAGAAG	AAAGGGAGGAAGGGGAGAAGGGGGCAAGGAGGGGGAGAAGGGGGAGGAGCAA	hap_03	hap_v170	AG	3	NA	TC	NA	SINE/SINE
validation	roan	dog_10252	ATAAAAAAGGAGGGGAAGGGAGGGAGAAAAAGGGAAGAAGGGAGAGGAAAAG	GAAGAGAGAAGGGAGAGGAGAGGGCGAAGCAGAAGAAAAGGGGGAGGAGCAG	hap_04	hap_c168	AG	3	NA	TC	NA	SINE/SINE
validation	roan	dog_10253	ATAAAAGAGAGGAGAAGGGGAGGGAGGGGCAGGAGAGAAGAGGGAGGCGCAG	GAAAAAGAGAGAGGGGGGAAAGAGAGAAAAAGGGAAGAAGGGAGAGGAACAA	hap_v164	hap_GG01	GG	3	NA	TC	NA	SINE/-
validation	roan	dog_10257	GAAGAGAAGAGAGGGGGAAGAGAGAGGGGAAGGGGGGAAGGGGGAGGAGCGG	ATAAAAAAGGAGGGGAAGGGAGGGAGAAAAAGGGGAGGACGGGGAGGAGAAG	hap_c84	hap_03	AG	3	NA	TC	NA	SINE/SINE
validation	roan	dog_10258	GAAAAAAAGGAGGGGGGGGGAGGGCGGGGAAGGGGAGAAGGGGGAGGAGCAG	ATAAAAAAGGAGGGGAAGGGAGGGAGAAAAAGGGAAGAAGGGGGAGGAACAA	hap_v002	hap_02	AG	3	NA	TC	NA	SINE/-
validation	roan	dog_10260	AAAGAGAGAAGGGAGAGGAGAGGGAGGGGAAGGAGGGGAGAGGAAGGAACGG	ATAAAAAAGGAGGGGAAGGGAGGGAGAAAAAGGGGAGGACGGGGAGGAGAAG	hap_r58	hap_03	AG	3	NA	TC	NA	SINE/SINE
validation	roan	dog_10262	ATAGAAGAGAGGGGGGGAAAAGGGAGGGGAAGGGGAGAAGAGGGAGGAGCGG	ATAAAAAAGGAGGGGAAGGGAGGGAGAAAAAGGGAAGAAGGGGGAGGAACAA	hap_v004	hap_02	AG	3	NA	TC	NA	SINE/SINE
validation	roan	dog_10265	ATAAAAAAGGAGGGGAAGGGAGGGAGAAAAAGGGAAGAAGGGGGAGGAACAA	ATAAAAAAGGAGGGGAAGGGAGGGAGAAAAAGGGGAGGACGGGGAGGAGAAG	hap_02	hap_03	AA	4	NA	TT	NA	SINE/SINE
validation	roan	dog_10269	ATAAAAAAGGAGGGGAAGGGAGGGAGAAAAAGGGAAGAAGGGGGAGGAACAA	GAAAAAAAGGAGGGGGGGGGAGGGAGAAAAAGGGGAGGGGAAGAAAGAACAG	hap_02	hap_v126	AG	4	1	TT	NA	SINE/-
validation	roan	dog_10273	GTGAAAGAGGGGGGGAGGAGGGGGAGGAGAAGGAGAAGGGAGGGGAAAGCAA	GAAAAAGAGAGAGGGGGGAAAGAGAGAAAAAGGGAAGAAGGGAGAGGAACAA	hap_c39	hap_GG01	GG	3	NA	TC	NA	SINE/SINE
dalmatian	dalmatian	dog_20001	GAAAAAAAGGAGGGGAAGGGAGGGAGAAAAAGGGAAGAAGGGAGAGGAACAA	GAAAAAAAGGAGGGGAAGGGAGGGAGAAAAAGGGAAGAAGGGAGAGGAACAA	hap_06	hap_06	AA	4	NA	TT	NA	SINE/SINE
dalmatian	dalmatian	dog_20002	GAAAAAAAGGAGGGGAAGGGAGGGAGAAAAAGGGAAGAAGGGAGAGGAACAA	ATAAAAAAGGAGGGGAAGGGAGGGAGAAAAAGGGAAGAAGGGAGAGGAACAA	hap_06	hap_01	AA	4	NA	TT	NA	SINE/SINE
dalmatian	dalmatian	dog_20003	ATAAAAAAGGAGGGGAAGGGAGGGAGAAAAAGGGAAGAAGGGAGAGGAACAA	GAAAAAAAGGAGGGGAAGGGAGGGAGAAAAAGGGAAGAAGGGAGAGGAACAA	hap_01	hap_06	AA	4	NA	TT	NA	SINE/SINE
dalmatian	dalmatian	dog_20004	ATAAAAAAGGAGGGGAAGGGAGGGAGAAAAAGGGAAGAAGGGAGAGGAACAA	ATAAAAAAGGAGGGGAAGGGAGGGAGAAAAAGGGAAGAAGGGAGAGGAACAA	hap_01	hap_01	AA	4	NA	TT	NA	SINE/SINE
dalmatian	dalmatian	dog_20005	GAAAAAAAGGAGGGGAAGGGAGGGAGAAAAAGGGAAGAAGGGAGAGGAACAA	ATAAAAAAGGAGGGGAAGGGAGGGAGAAAAAGGGAAGAAGGGAGAGGAACAA	hap_06	hap_01	AA	4	NA	TT	NA	SINE/SINE
dalmatian	dalmatian	dog_20006	ATAAAAAAGGAGGGGAAGGGAGGGAGAAAAAGGGAAGAAGGGAGAGGAACAA	ATAAAAAAGGAGGGGAAGGGAGGGAGAAAAAGGGAAGAAGGGAGAGGAACAA	hap_01	hap_01	AA	4	NA	TT	NA	SINE/SINE
dalmatian	dalmatian	dog_20007	GAAAAAAAGGAGGGGAAGGGAGGGAGAAAAAGGGAAGAAGGGAGAGGAACAA	ATAAAAAAGGAGGGGAAGGGAGGGAGAAAAAGGGAAGAAGGGAGAGGAACAA	hap_06	hap_01	AA	4	NA	TT	NA	SINE/SINE
dalmatian	dalmatian	dog_20008	ATAAAAAAGGAGGGGAAGGGAGGGAGAAAAAGGGAAGAAGGGAGAGGAACAA	ATAAAAAAGGAGGGGAAGGGAGGGAGAAAAAGGGAAGAAGGGAGAGGAACAA	hap_01	hap_01	AA	4	NA	TT	NA	SINE/SINE
dalmatian	dalmatian	dog_20009	ATAAAAAAGGAGGGGAAGGGAGGGAGAAAAAGGGAAGAAGGGAGAGGAACAA	ATAAAAAAGGAGGGGAAGGGAGGGAGAAAAAGGGAAGAAGGGAGAGGAACAA	hap_01	hap_01	AA	4	NA	TT	NA	SINE/SINE
dalmatian	dalmatian	dog_20010	GAAAAAAAGGAGGGGAAGGGAGGGAGAAAAAGGGAAGAAGGGAGAGGAACAA	ATAAAAAAGGAGGGGAAGGGAGGGAGAAAAAGGGAAGAAGGGAGAGGAACAA	hap_06	hap_01	AA	4	NA	TT	NA	SINE/SINE
dalmatian	dalmatian	dog_20011	ATAGGGAGGAAGGGGAGAAGGGGGAGAAAAAGGGAAGAAGGGAGAGGAACAA	ATAAAAAAGGAGGGGAAGGGAGGGAGAAAAAGGGAAGAAGGGAGAGGAACAA	hap_d003	hap_01	GA	4	NA	0	NA	SINE/SINE
dalmatian	dalmatian	dog_20012	ATAAAAAAGGAGGGGAAGGGAGGGAGAAAAAGGGAAGAAGGGAGAGGAACAA	ATAAAAAAGGAGGGGAAGGGAGGGAGAAAAAGGGAAGAAGGGAGAGGAACAA	hap_01	hap_01	AA	4	NA	TT	NA	SINE/SINE
dalmatian	dalmatian	dog_20013	GAAAAAAAGGAGGGGAAGGGAGGGAGAAAAAGGGAAGAAGGGAGAGGAACAA	GAAAAAAAGGAGGGGAAGGGAGGGAGAAAAAGGGAAGAAGGGAGAGGAACAA	hap_06	hap_06	AA	4	NA	TT	NA	SINE/SINE
dalmatian	dalmatian	dog_20014	GAAAAAAAGGAGGGGAAGGGAGGGAGAAAAAGGGAAGAAGGGAGAGGAACAA	ATAAAAAAGGAGGGGAAGGGAGGGAGAAAAAGGGAAGAAGGGAGAGGAACAA	hap_06	hap_01	AA	4	NA	TT	NA	SINE/SINE
dalmatian	dalmatian	dog_20015	ATAAAAAAGGAGGGGAAGGGAGGGAGAAAAAGGGAAGAAGGGAGAGGAACAA	ATAAAAAAGGAGGGGAAGGGAGGGAGAAAAAGGGAAGAAGGGAGAGGAACAA	hap_01	hap_01	AA	4	NA	TT	NA	SINE/SINE
dalmatian	dalmatian	dog_20016	ATAAAAAAGGAGGGGAAGGGAGGGAGAAAAAGGGAAGAAGGGAGAGGAACAA	ATAAAAAAGGAGGGGAAGGGAGGGAGAAAAAGGGAAGAAGGGAGAGGAACAA	hap_01	hap_01	AA	4	NA	TT	NA	SINE/SINE
dalmatian	dalmatian	dog_20017	GAAAAAAAGGAGGGGAAGGGAGGGAGAAAAAGGGAAGAAGGGAGAGGAACAA	ATAAAAAAGGAGGGGAAGGGAGGGAGAAAAAGGGAAGAAGGGAGAGGAACAA	hap_06	hap_01	AA	4	NA	TT	NA	SINE/SINE
dalmatian	dalmatian	dog_20018	ATAAAAAAGGAGGGGAAGGGAGGGAGAAAAAGGGAAGAAGGGAGAGGAACAA	ATAAAAAAGGAGGGGAAGGGAGGGAGAAAAAGGGAAGAAGGGAGAGGAACAA	hap_01	hap_01	AA	4	NA	TT	NA	SINE/SINE
dalmatian	dalmatian	dog_20019	ATAAAAAAGGAGGGGAAGGGAGGGAGAAAAAGGGAAGAAGGGAGAGGAACAA	ATAAAAAAGGAGGGGAAGGGAGGGAGAAAAAGGGAAGAAGGGAGAGGAACAA	hap_01	hap_01	AA	4	NA	TT	NA	SINE/SINE
dalmatian	dalmatian	dog_20020	ATAAAAAAGGAGGGGAAGGGAGGGAGAAAAAGGGAAGAAGGGAGAGGAACAA	ATAAAAAAGGAGGGGAAGGGAGGGAGAAAAAGGGAAGAAGGGAGAGGAACAA	hap_01	hap_01	AA	4	NA	TT	NA	SINE/SINE
dalmatian	dalmatian	dog_20021	ATAAAAAAGGAGGGGAAGGGAGGGAGAAAAAGGGAAGAAGGGAGAGGAACAA	ATAAAAAAGGAGGGGAAGGGAGGGAGAAAAAGGGAAGAAGGGAGAGGAACAA	hap_01	hap_01	AA	4	NA	TT	NA	SINE/SINE
dalmatian	dalmatian	dog_20022	GAAAAAAAGGAGGGGAAGGGAGGGAGAAAAAGGGAAGAAGGGAGAGGAACAA	ATAAAAAAGGAGGGGAAGGGAGGGAGAAAAAGGGAAGAAGGGAGAGGAACAA	hap_06	hap_01	AA	4	NA	TT	NA	SINE/SINE
dalmatian	dalmatian	dog_20023	ATAAAAAAGGAGGGGAAGGGAGGGAGAAAAAGGGAAGAAGGGAGAGGAACAA	ATAAAAAAGGAGGGGAAGGGAGGGAGAAAAAGGGAAGAAGGGAGAGGAACAA	hap_01	hap_01	AA	4	NA	TT	NA	SINE/SINE
dalmatian	dalmatian	dog_20024	GAAAAAAAGGAGGGGAAGGGAGGGAGAAAAAGGGAAGAAGGGAGAGGAACAA	ATAAAAAAGGAGGGGAAGGGAGGGAGAAAAAGGGAAGAAGGGAGAGGAACAA	hap_06	hap_01	AA	4	NA	TT	NA	SINE/SINE
dalmatian	dalmatian	dog_20025	ATAAAAAAGGAGGGGAAGGGAGGGAGAAAAAGGGAAGAAGGGAGAGGAACAA	GAAAAAAAGGAGGGGAAGGGAGGGAGAAAAAGGGAAGAAGGGAGAGGAACAA	hap_01	hap_06	AA	4	NA	TT	NA	SINE/SINE
dalmatian	dalmatian	dog_20026	ATAAAAAAGGAGGGGAAGGGAGGGAGAAAAAGGGAAGAAGGGAGAGGAACAA	GAAAAAAAGGAGGGGAAGGGAGGGAGAAAAAGGGAAGAAGGGAGAGGAACAA	hap_01	hap_06	AA	4	NA	TT	NA	SINE/SINE
dalmatian	dalmatian	dog_20027	ATAAAAAAGGAGGGGAAGGGAGGGAGAAAAAGGGAAGAAGGGAGAGGAACAA	ATAAAAAAGGAGGGGAAGGGAGGGAGAAAAAGGGAAGAAGGGAGAGGAACAA	hap_01	hap_01	AA	4	NA	TT	NA	SINE/SINE
dalmatian	dalmatian	dog_20028	ATAAAAAAGGAGGGGAAGGGAGGGAGAAAAAGGGAAGAAGGGAGAGGAACAA	GAAAAAAAGGAGGGGAAGGGAGGGAGAAAAAGGGAAGAAGGGAGAGGAACAA	hap_01	hap_06	AA	4	NA	TT	NA	SINE/SINE
dalmatian	dalmatian	dog_20029	ATAAAAAAGGAGGGGAAGGGAGGGAGAAAAAGGGAAGAAGGGAGAGGAACAA	ATAAAAAAGGAGGGGAAGGGAGGGAGAAAAAGGGAAGAAGGGAGAGGAACAA	hap_01	hap_01	AA	4	NA	TT	NA	SINE/SINE
dalmatian	dalmatian	dog_20030	ATAAAAAAGGAGGGGAAGGGAGGGAGAAAAAGGGAAGAAGGGAGAGGAACAA	ATAAAAAAGGAGGGGAAGGGAGGGAGAAAAAGGGAAGAAGGGAGAGGAACAA	hap_01	hap_01	AA	4	NA	TT	NA	SINE/SINE
dalmatian	dalmatian	dog_20031	ATAAAAAAGGAGGGGAAGGGAGGGAGAAAAAGGGAAGAAGGGAGAGGAACAA	ATAAAAAAGGAGGGGAAGGGAGGGAGAAAAAGGGAAGAAGGGAGAGGAACAA	hap_01	hap_01	AA	4	NA	TT	NA	SINE/SINE
dalmatian	dalmatian	dog_20032	ATAAAAAAGGAGGGGAAGGGAGGGAGAAAAAGGGAAGAAGGGAGAGGAACAA	ATAAAAAAGGAGGGGAAGGGAGGGAGAAAAAGGGAAGAAGGGAGAGGAACAA	hap_01	hap_01	AA	4	NA	TT	NA	SINE/SINE
dalmatian	dalmatian	dog_20033	ATAAAAAAGGAGGGGAAGGGAGGGAGAAAAAGGGAAGAAGGGAGAGGAACAA	ATAAAAAAGGAGGGGAAGGGAGGGAGAAAAAGGGAAGAAGGGAGAGGAACAA	hap_01	hap_01	AA	4	NA	TT	NA	SINE/SINE
dalmatian	dalmatian	dog_20034	ATAAAAAAGGAGGGGAAGGGAGGGAGAAAAAGGGAAGAAGGGAGAGGAACAA	ATAAAAAAGGAGGGGAAGGGAGGGAGAAAAAGGGAAGAAGGGAGAGGAACAA	hap_01	hap_01	AA	4	NA	TT	NA	SINE/SINE
dalmatian	dalmatian	dog_20035	ATAAAAAAGGAGGGGAAGGGAGGGAGAAAAAGGGAAGAAGGGAGAGGAACAA	ATAAAAAAGGAGGGGAAGGGAGGGAGAAAAAGGGAAGAAGGGAGAGGAACAA	hap_01	hap_01	AA	4	NA	TT	NA	SINE/SINE
dalmatian	dalmatian	dog_20036	GAAAAAAAGGAGGGGAAGGGAGGGAGAAAAAGGGAAGAAGGGAGAGGAACAA	GAAAAAAAGGAGGGGAAGGGAGGGAGAAAAAGGGAAGAAGGGAGAGGAACAA	hap_06	hap_06	AA	4	NA	TT	NA	SINE/SINE
dalmatian	dalmatian	dog_20037	ATAAAAAAGGAGGGGAAGGGAGGGAGAAAAAGGGAAGAAGGGAGAGGAACAA	GAAAAAAAGGAGGGGAAGGGAGGGAGAAAAAGGGAAGAAGGGAGAGGAACAA	hap_01	hap_06	AA	4	NA	TT	NA	SINE/SINE
dalmatian	dalmatian	dog_20038	GAAAAAAAGGAGGGGAAGGGAGGGAGAAAAAGGGAAGAAGGGAGAGGAACAA	ATAAAAAAGGAGGGGAAGGGAGGGAGAAAAAGGGAAGAAGGGAGAGGAACAA	hap_06	hap_01	AA	4	NA	TT	NA	SINE/SINE
dalmatian	dalmatian	dog_20039	ATAAAAAAGGAGGGGAAGGGAGGGAGAAAAAGGGAAGAAGGGAGAGGAACAA	ATAAAAAAGGAGGGGAAGGGAGGGAGAAAAAGGGAAGAAGGGAGAGGAACAA	hap_01	hap_01	AA	4	NA	TT	NA	SINE/SINE
dalmatian	dalmatian	dog_20040	ATAAAAAAGGAGGGGAAGGGAGGGAGAAAAAGGGAAGAAGGGAGAGGAACAA	ATAGGGAGGAAGGGGAGAAGGGGGAGAAAAAGGGAAGAAGGGAGAGGAACAA	hap_01	hap_d003	GA	4	NA	0	NA	SINE/SINE
dalmatian	dalmatian	dog_20041	ATAAAAAAGGAGGGGAAGGGAGGGAGAAAAAGGGAAGAAGGGAGAGGAACAA	ATAAAAAAGGAGGGGAAGGGAGGGAGAAAAAGGGAAGAAGGGAGAGGAACAA	hap_01	hap_01	AA	4	NA	TT	NA	SINE/SINE
dalmatian	dalmatian	dog_20042	GAAAAAAAGGAGGGGAAGGGAGGGAGAAAAAGGGAAGAAGGGAGAGGAACAA	GAAAAAAAGGAGGGGAAGGGAGGGAGAAAAAGGGAAGAAGGGAGAGGAACAA	hap_06	hap_06	AA	4	NA	TT	NA	SINE/SINE
dalmatian	dalmatian	dog_20043	ATAAAAAAGGAGGGGAAGGGAGGGAGAAAAAGGGAAGAAGGGAGAGGAACAA	ATAAAAAAGGAGGGGAAGGGAGGGAGAAAAAGGGAAGAAGGGAGAGGAACAA	hap_01	hap_01	AA	4	NA	TT	NA	SINE/SINE
dalmatian	dalmatian	dog_20044	ATAAAAAAGGAGGGGAAGGGAGGGAGAAAAAGGGAAGAAGGGAGAGGAACAA	ATAAAAAAGGAGGGGAAGGGAGGGAGAAAAAGGGAAGAAGGGAGAGGAACAA	hap_01	hap_01	AA	4	NA	TT	NA	SINE/SINE
dalmatian	dalmatian	dog_20045	ATAAAAAAGGAGGGGAAGGGAGGGAGAAAAAGGGAAGAAGGGAGAGGAACAA	ATAAAAAAGGAGGGGAAGGGAGGGAGAAAAAGGGAAGAAGGGAGAGGAACAA	hap_01	hap_01	AA	4	NA	TT	NA	SINE/SINE
dalmatian	dalmatian	dog_20046	GAAAAAAAGGAGGGGAAGGGAGGGAGAAAAAGGGAAGAAGGGAGAGGAACAA	ATAAAAAAGGAGGGGAAGGGAGGGAGAAAAAGGGAAGAAGGGAGAGGAACAA	hap_06	hap_01	AA	4	NA	TT	NA	SINE/SINE
dalmatian	dalmatian	dog_20047	GAAAAAAAGGAGGGGAAGGGAGGGAGAAAAAGGGAAGAAGGGAGAGGAACAA	ATAAAAAAGGAGGGGAAGGGAGGGAGAAAAAGGGAAGAAGGGAGAGGAACAA	hap_06	hap_01	AA	4	NA	TT	NA	SINE/SINE
dalmatian	dalmatian	dog_20048	GAAAAAAAGGAGGGGAAGGGAGGGAGAAAAAGGGAAGAAGGGAGAGGAACAA	ATAAAAAAGGAGGGGAAGGGAGGGAGAAAAAGGGAAGAAGGGAGAGGAACAA	hap_06	hap_01	AA	4	NA	TT	NA	SINE/SINE
dalmatian	dalmatian	dog_20049	ATAAAAAAGGAGGGGAAGGGAGGGAGAAAAAGGGAAGAAGGGAGAGGAACAA	ATAAAAAAGGAGGGGAAGGGAGGGAGAAAAAGGGAAGAAGGGAGAGGAACAA	hap_01	hap_01	AA	4	NA	TT	NA	SINE/SINE
dalmatian	dalmatian	dog_20050	ATAAAAAAGGAGGGGAAGGGAGGGAGAAAAAGGGAAGAAGGGAGAGGAACAA	ATAAAAAAGGAGGGGAAGGGAGGGAGAAAAAGGGAAGAAGGGAGAGGAACAA	hap_01	hap_01	AA	4	NA	TT	NA	SINE/SINE
dalmatian	dalmatian	dog_20051	ATAAAAAAGGAGGGGAAGGGAGGGAGAAAAAGGGAAGAAGGGAGAGGAACAA	ATAAAAAAGGAGGGGAAGGGAGGGAGAAAAAGGGAAGAAGGGAGAGGAACAA	hap_01	hap_01	AA	4	NA	TT	NA	SINE/SINE
dalmatian	dalmatian	dog_20052	ATAGGGAGGAAGGGGAGAAGGGGGAGAAAAAGGGAAGAAGGGAGAGGAACAA	ATAAAAAAGGAGGGGAAGGGAGGGAGAAAAAGGGAAGAAGGGAGAGGAACAA	hap_d003	hap_01	GA	4	NA	0	NA	SINE/SINE
dalmatian	dalmatian	dog_20053	ATAAAAAAGGAGGGGAAGGGAGGGAGAAAAAGGGAAGAAGGGAGAGGAACAA	ATAAAAAAGGAGGGGAAGGGAGGGAGAAAAAGGGAAGAAGGGAGAGGAACAA	hap_01	hap_01	AA	4	NA	TT	NA	SINE/SINE
dalmatian	dalmatian	dog_20054	GAAAAAAAGGAGGGGAAGGGAGGGAGAAAAAGGGAAGAAGGGAGAGGAACAA	ATAGGGAGGAAGGGGAGAAGGGGGAGAAAAAGGGAAGAAGGGAGAGGAACAA	hap_06	hap_d003	GA	4	NA	0	NA	SINE/SINE
dalmatian	dalmatian	dog_20055	ATAAAAAAGGAGGGGAAGGGAGGGAGAAAAAGGGAAGAAGGGAGAGGAACAA	ATAAAAAAGGAGGGGAAGGGAGGGAGAAAAAGGGAAGAAGGGAGAGGAACAA	hap_01	hap_01	AA	4	NA	TT	NA	SINE/SINE
dalmatian	dalmatian	dog_20056	ATAAAAAAGGAGGGGAAGGGAGGGAGAAAAAGGGAAGAAGGGAGAGGAACAA	ATAAAAAAGGAGGGGAAGGGAGGGAGAAAAAGGGAAGAAGGGAGAGGAACAA	hap_01	hap_01	AA	4	NA	TT	NA	SINE/SINE
dalmatian	dalmatian	dog_20057	ATAGGGAGGAAGGGGAGAAGGGGGAGAAAAAGGGAAGAAGGGAGAGGAACAA	ATAAAAAAGGAGGGGAAGGGAGGGAGAAAAAGGGAAGAAGGGAGAGGAACAA	hap_d003	hap_01	GA	4	NA	0	NA	SINE/SINE
dalmatian	dalmatian	dog_20058	ATAAAAAAGGAGGGGAAGGGAGGGAGAAAAAGGGAAGAAGGGAGAGGAACAA	GAAAAAAAGGAGGGGAAGGGAGGGAGAAAAAGGGAAGAAGGGAGAGGAACAA	hap_01	hap_06	AA	4	NA	TT	NA	SINE/SINE
dalmatian	dalmatian	dog_20059	GAAAAAAAGGAGGGGAAGGGAGGGAGAAAAAGGGAAGAAGGGAGAGGAACAA	ATAAAAAAGGAGGGGAAGGGAGGGAGAAAAAGGGAAGAAGGGAGAGGAACAA	hap_06	hap_01	AA	4	NA	TT	NA	SINE/SINE
dalmatian	dalmatian	dog_20060	GAAAAAAAGGAGGGGAAGGGAGGGAGAAAAAGGGAAGAAGGGAGAGGAACAA	GAAAAAAAGGAGGGGAAGGGAGGGAGAAAAAGGGAAGAAGGGAGAGGAACAA	hap_06	hap_06	AA	4	NA	TT	NA	SINE/SINE
dalmatian	dalmatian	dog_20061	ATAAAAAAGGAGGGGAAGGGAGGGAGAAAAAGGGAAGAAGGGAGAGGAACAA	ATAAAAAAGGAGGGGAAGGGAGGGAGAAAAAGGGAAGAAGGGAGAGGAACAA	hap_01	hap_01	AA	4	NA	TT	NA	SINE/SINE
dalmatian	dalmatian	dog_20062	ATAAAAAAGGAGGGGAAGGGAGGGAGAAAAAGGGAAGAAGGGAGAGGAACAA	ATAAAAAAGGAGGGGAAGGGAGGGAGAAAAAGGGAAGAAGGGAGAGGAACAA	hap_01	hap_01	AA	4	NA	TT	NA	SINE/SINE
dalmatian	dalmatian	dog_20063	ATAAAAAAGGAGGGGAAGGGAGGGAGAAAAAGGGAAGAAGGGAGAGGAACAA	ATAAAAAAGGAGGGGAAGGGAGGGAGAAAAAGGGAAGAAGGGAGAGGAACAA	hap_01	hap_01	AA	4	NA	TT	NA	SINE/SINE
dalmatian	dalmatian	dog_20064	GAAAAAAAGGAGGGGAAGGGAGGGAGAAAAAGGGAAGAAGGGAGAGGAACAA	ATAAAAAAGGAGGGGAAGGGAGGGAGAAAAAGGGAAGAAGGGAGAGGAACAA	hap_06	hap_01	AA	4	NA	TT	NA	SINE/SINE
dalmatian	dalmatian	dog_20065	ATAAAAAAGGAGGGGAAGGGAGGGAGAAAAAGGGAAGAAGGGAGAGGAACAA	ATAAAAAAGGAGGGGAAGGGAGGGAGAAAAAGGGAAGAAGGGAGAGGAACAA	hap_01	hap_01	AA	4	NA	TT	NA	SINE/SINE
dalmatian	dalmatian	dog_20066	ATAAAAAAGGAGGGGAAGGGAGGGAGAAAAAGGGAAGAAGGGAGAGGAACAA	GAAAAAAAGGAGGGGAAGGGAGGGAGAAAAAGGGAAGAAGGGAGAGGAACAA	hap_01	hap_06	AA	4	NA	TT	NA	SINE/SINE
dalmatian	dalmatian	dog_20067	GAAAAAAAGGAGGGGAAGGGAGGGAGAAAAAGGGAAGAAGGGAGAGGAACAA	ATAAAAAAGGAGGGGAAGGGAGGGAGAAAAAGGGAAGAAGGGAGAGGAACAA	hap_06	hap_01	AA	4	NA	TT	NA	SINE/SINE
dalmatian	dalmatian	dog_20068	ATAAAAAAGGAGGGGAAGGGAGGGAGAAAAAGGGAAGAAGGGAGAGGAACAA	ATAAAAAAGGAGGGGAAGGGAGGGAGAAAAAGGGAAGAAGGGAGAGGAACAA	hap_01	hap_01	AA	4	NA	TT	NA	SINE/SINE
dalmatian	dalmatian	dog_20069	ATAAAAAAGGAGGGGAAGGGAGGGAGAAAAAGGGAAGAAGGGAGAGGAACAA	ATAAAAAAGGAGGGGAAGGGAGGGAGAAAAAGGGAAGAAGGGAGAGGAACAA	hap_01	hap_01	AA	4	NA	TT	NA	SINE/SINE
dalmatian	dalmatian	dog_20070	GAAAAAAAGGAGGGGAAGGGAGGGAGAAAAAGGGAAGAAGGGAGAGGAACAA	ATAAAAAAGGAGGGGAAGGGAGGGAGAAAAAGGGAAGAAGGGAGAGGAACAA	hap_06	hap_01	AA	4	NA	TT	NA	SINE/SINE
dalmatian	dalmatian	dog_20071	GAAAAAAAGGAGGGGAAGGGAGGGAGAAAAAGGGAAGAAGGGAGAGGAACAA	ATAAAAAAGGAGGGGAAGGGAGGGAGAAAAAGGGAAGAAGGGAGAGGAACAA	hap_06	hap_01	AA	4	NA	TT	NA	SINE/SINE
dalmatian	dalmatian	dog_20072	ATAAAAAAGGAGGGGAAGGGAGGGAGAAAAAGGGAAGAAGGGAGAGGAACAA	ATAAAAAAGGAGGGGAAGGGAGGGAGAAAAAGGGAAGAAGGGAGAGGAACAA	hap_01	hap_01	AA	4	NA	TT	NA	SINE/SINE
dalmatian	dalmatian	dog_20073	ATAGGGAGGAAGGGGAGAAGGGGGAGAAAAAGGGAAGAAGGGAGAGGAACAA	ATAAAAAAGGAGGGGAAGGGAGGGAGAAAAAGGGAAGAAGGGAGAGGAACAA	hap_d003	hap_01	GA	4	NA	0	NA	SINE/SINE
dalmatian	dalmatian	dog_20074	ATAAAAAAGGAGGGGAAGGGAGGGAGAAAAAGGGAAGAAGGGAGAGGAACAA	ATAAAAAAGGAGGGGAAGGGAGGGAGAAAAAGGGAAGAAGGGAGAGGAACAA	hap_01	hap_01	AA	4	NA	TT	NA	SINE/SINE
dalmatian	dalmatian	dog_20075	GAAAAAAAGGAGGGGAAGGGAGGGAGAAAAAGGGAAGAAGGGAGAGGAACAA	GAAAAAAAGGAGGGGAAGGGAGGGAGAAAAAGGGAAGAAGGGAGAGGAACAA	hap_06	hap_06	AA	4	NA	TT	NA	SINE/SINE
dalmatian	dalmatian	dog_20076	ATAAAAAAGGAGGGGAAGGGAGGGAGAAAAAGGGAAGAAGGGAGAGGAACAA	GAAAAAAAGGAGGGGAAGGGAGGGAGAAAAAGGGAAGAAGGGAGAGGAACAA	hap_01	hap_06	AA	4	NA	TT	NA	SINE/SINE
dalmatian	dalmatian	dog_20077	ATAAAAAAGGAGGGGAAGGGAGGGAGAAAAAGGGAAGAAGGGAGAGGAACAA	ATAAAAAAGGAGGGGAAGGGAGGGAGAAAAAGGGAAGAAGGGAGAGGAACAA	hap_01	hap_01	AA	4	NA	TT	NA	SINE/SINE
dalmatian	dalmatian	dog_20078	ATAAAAAAGGAGGGGAAGGGAGGGAGAAAAAGGGAAGAAGGGAGAGGAACAA	ATAAAAAAGGAGGGGAAGGGAGGGAGAAAAAGGGAAGAAGGGAGAGGAACAA	hap_01	hap_01	AA	4	NA	TT	NA	SINE/SINE
dalmatian	dalmatian	dog_20079	ATAAAAAAGGAGGGGAAGGGAGGGAGAAAAAGGGAAGAAGGGAGAGGAACAA	ATAAAAAAGGAGGGGAAGGGAGGGAGAAAAAGGGAAGAAGGGAGAGGAACAA	hap_01	hap_01	AA	4	NA	TT	NA	SINE/SINE
dalmatian	dalmatian	dog_20080	ATAAAAAAGGAGGGGAAGGGAGGGAGAAAAAGGGAAGAAGGGAGAGGAACAA	ATAAAAAAGGAGGGGAAGGGAGGGAGAAAAAGGGAAGAAGGGAGAGGAACAA	hap_01	hap_01	AA	4	NA	TT	NA	SINE/SINE
dalmatian	dalmatian	dog_20081	ATAGGGAGGAAGGGGAGAAGGGGGAGAAAAAGGGAAGAAGGGAGAGGAACAA	ATAAAAAAGGAGGGGAAGGGAGGGAGAAAAAGGGAAGAAGGGAGAGGAACAA	hap_d003	hap_01	GA	4	NA	0	NA	SINE/SINE
dalmatian	dalmatian	dog_20082	GAAAAAAAGGAGGGGAAGGGAGGGAGAAAAAGGGAAGAAGGGAGAGGAACAA	ATAAAAAAGGAGGGGAAGGGAGGGAGAAAAAGGGAAGAAGGGAGAGGAACAA	hap_06	hap_01	AA	4	NA	TT	NA	SINE/SINE
dalmatian	dalmatian	dog_20083	GAAAAAAAGGAGGGGAAGGGAGGGAGAAAAAGGGAAGAAGGGAGAGGAACAA	ATAAAAAAGGAGGGGAAGGGAGGGAGAAAAAGGGAAGAAGGGAGAGGAACAA	hap_06	hap_01	AA	4	NA	TT	NA	SINE/SINE
dalmatian	dalmatian	dog_20084	ATAAAAAAGGAGGGGAAGGGAGGGAGAAAAAGGGAAGAAGGGAGAGGAACAA	ATAAAAAAGGAGGGGAAGGGAGGGAGAAAAAGGGAAGAAGGGAGAGGAACAA	hap_01	hap_01	AA	4	NA	TT	NA	SINE/SINE
dalmatian	dalmatian	dog_20085	ATAGGGAGGAAGGGGAGAAGGGGGAGAAAAAGGGAAGAAGGGAGAGGAACAA	ATAAAAAAGGAGGGGAAGGGAGGGAGAAAAAGGGAAGAAGGGAGAGGAACAA	hap_d003	hap_01	GA	4	NA	0	NA	SINE/SINE
dalmatian	dalmatian	dog_20086	ATAAAAAAGGAGGGGAAGGGAGGGAGAAAAAGGGAAGAAGGGAGAGGAACAA	GAAAAAAAGGAGGGGAAGGGAGGGAGAAAAAGGGAAGAAGGGAGAGGAACAA	hap_01	hap_06	AA	4	NA	TT	NA	SINE/SINE
dalmatian	dalmatian	dog_20087	GAAAAAAAGGAGGGGAAGGGAGGGAGAAAAAGGGAAGAAGGGAGAGGAACAA	GAAAAAAAGGAGGGGAAGGGAGGGAGAAAAAGGGAAGAAGGGAGAGGAACAA	hap_06	hap_06	AA	4	NA	TT	NA	SINE/SINE
dalmatian	dalmatian	dog_20088	GAAAAAAAGGAGGGGAAGGGAGGGAGAAAAAGGGAAGAAGGGAGAGGAACAA	ATAAAAAAGGAGGGGAAGGGAGGGAGAAAAAGGGAAGAAGGGAGAGGAACAA	hap_06	hap_01	AA	4	NA	TT	NA	SINE/SINE
dalmatian	dalmatian	dog_20089	ATAAAAAAGGAGGGGAAGGGAGGGAGAAAAAGGGAAGAAGGGAGAGGAACAA	ATAAAAAAGGAGGGGAAGGGAGGGAGAAAAAGGGAAGAAGGGAGAGGAACAA	hap_01	hap_01	AA	4	NA	TT	NA	SINE/SINE
dalmatian	dalmatian	dog_20090	ATAAAAAAGGAGGGGAAGGGAGGGAGAAAAAGGGAAGAAGGGAGAGGAACAA	ATAAAAAAGGAGGGGAAGGGAGGGAGAAAAAGGGAAGAAGGGAGAGGAACAA	hap_01	hap_01	AA	4	NA	TT	NA	SINE/SINE
dalmatian	dalmatian	dog_20091	ATAAAAAAGGAGGGGAAGGGAGGGAGAAAAAGGGAAGAAGGGAGAGGAACAA	ATAAAAAAGGAGGGGAAGGGAGGGAGAAAAAGGGAAGAAGGGAGAGGAACAA	hap_01	hap_01	AA	4	NA	TT	NA	SINE/SINE
dalmatian	dalmatian	dog_20092	ATAAAAAAGGAGGGGAAGGGAGGGAGAAAAAGGGAAGAAGGGAGAGGAACAA	ATAAAAAAGGAGGGGAAGGGAGGGAGAAAAAGGGAAGAAGGGAGAGGAACAA	hap_01	hap_01	AA	4	NA	TT	NA	SINE/SINE
dalmatian	dalmatian	dog_20093	ATAAAAAAGGAGGGGAAGGGAGGGAGAAAAAGGGAAGAAGGGAGAGGAACAA	ATAAAAAAGGAGGGGAAGGGAGGGAGAAAAAGGGAAGAAGGGAGAGGAACAA	hap_01	hap_01	AA	4	NA	TT	NA	SINE/SINE
dalmatian	dalmatian	dog_20094	ATAAAAAAGGAGGGGAAGGGAGGGAGAAAAAGGGAAGAAGGGAGAGGAACAA	ATAAAAAAGGAGGGGAAGGGAGGGAGAAAAAGGGAAGAAGGGAGAGGAACAA	hap_01	hap_01	AA	4	NA	TT	NA	SINE/SINE
dalmatian	dalmatian	dog_20095	GAAAAAAAGGAGGGGAAGGGAGGGAGAAAAAGGGAAGAAGGGAGAGGAACAA	GAAAAAAAGGAGGGGAAGGGAGGGAGAAAAAGGGAAGAAGGGAGAGGAACAA	hap_06	hap_06	AA	4	NA	TT	NA	SINE/SINE
dalmatian	dalmatian	dog_20096	ATAAAAAAGGAGGGGAAGGGAGGGAGAAAAAGGGAAGAAGGGAGAGGAACAA	ATAAAAAAGGAGGGGAAGGGAGGGAGAAAAAGGGAAGAAGGGAGAGGAACAA	hap_01	hap_01	AA	4	NA	TT	NA	SINE/SINE
dalmatian	dalmatian	dog_20097	ATAAAAAAGGAGGGGAAGGGAGGGAGAAAAAGGGAAGAAGGGAGAGGAACAA	ATAAAAAAGGAGGGGAAGGGAGGGAGAAAAAGGGAAGAAGGGAGAGGAACAA	hap_01	hap_01	AA	4	NA	TT	NA	SINE/SINE
dalmatian	dalmatian	dog_20098	ATAGGGAGGAAGGGGAGAAGGGGGAGAAAAAGGGAAGAAGGGAGAGGAACAA	GAAAAAAAGGAGGGGAAGGGAGGGAGAAAAAGGGAAGAAGGGAGAGGAACAA	hap_d003	hap_06	GA	4	NA	0	NA	SINE/SINE
dalmatian	dalmatian	dog_20099	GAAAAAAAGGAGGGGAAGGGAGGGAGAAAAAGGGAAGAAGGGAGAGGAACAA	ATAAAAAAGGAGGGGAAGGGAGGGAGAAAAAGGGAAGAAGGGAGAGGAACAA	hap_06	hap_01	AA	4	NA	TT	NA	SINE/SINE
dalmatian	dalmatian	dog_20100	ATAGGGAGGAAGGGGAGAAGGGGGAGAAAAAGGGAAGAAGGGAGAGGAACAA	ATAGGGAGGAAGGGGAGAAGGGGGAGAAAAAGGGAAGAAGGGAGAGGAACAA	hap_d003	hap_d003	GG	4	NA	0	NA	SINE/SINE
dalmatian	dalmatian	dog_20101	GAAAAAAAGGAGGGGAAGGGAGGGAGAAAAAGGGAAGAAGGGAGAGGAACAA	ATAAAAAAGGAGGGGAAGGGAGGGAGAAAAAGGGAAGAAGGGAGAGGAACAA	hap_06	hap_01	AA	4	NA	TT	NA	SINE/SINE
dalmatian	dalmatian	dog_20102	ATAGGGAGGAAGGGGAGAAGGGGGAGAAAAAGGGAAGAAGGGAGAGGAACAA	GAAAAAAAGGAGGGGAAGGGAGGGAGAAAAAGGGAAGAAGGGAGAGGAACAA	hap_d003	hap_06	GA	4	NA	0	NA	SINE/SINE
dalmatian	dalmatian	dog_20103	ATAAAAAAGGAGGGGAAGGGAGGGAGAAAAAGGGAAGAAGGGAGAGGAACAA	ATAAAAAAGGAGGGGAAGGGAGGGAGAAAAAGGGAAGAAGGGAGAGGAACAA	hap_01	hap_01	AA	4	NA	TT	NA	SINE/SINE
dalmatian	dalmatian	dog_20104	ATAAAAAAGGAGGGGAAGGGAGGGAGAAAAAGGGAAGAAGGGAGAGGAACAA	GAAAAAAAGGAGGGGAAGGGAGGGAGAAAAAGGGAAGAAGGGAGAGGAACAA	hap_01	hap_06	AA	4	NA	TT	NA	SINE/SINE
dalmatian	dalmatian	dog_20105	ATAAAAAAGGAGGGGAAGGGAGGGAGAAAAAGGGAAGAAGGGAGAGGAACAA	GAAAAAAAGGAGGGGAAGGGAGGGAGAAAAAGGGAAGAAGGGAGAGGAACAA	hap_01	hap_06	AA	4	NA	TT	NA	SINE/SINE
dalmatian	dalmatian	dog_20106	ATAAAAAAGGAGGGGAAGGGAGGGAGAAAAAGGGAAGAAGGGAGAGGAACAA	ATAAAAAAGGAGGGGAAGGGAGGGAGAAAAAGGGAAGAAGGGAGAGGAACAA	hap_01	hap_01	AA	4	NA	TT	NA	SINE/SINE
dalmatian	dalmatian	dog_20107	GAAAAAAAGGAGGGGAAGGGAGGGAGAAAAAGGGAAGAAGGGAGAGGAACAA	ATAAAAAAGGAGGGGAAGGGAGGGAGAAAAAGGGAAGAAGGGAGAGGAACAA	hap_06	hap_01	AA	4	NA	TT	NA	SINE/SINE
dalmatian	dalmatian	dog_20108	ATAAAAAAGGAGGGGAAGGGAGGGAGAAAAAGGGAAGAAGGGAGAGGAACAA	ATAAAAAAGGAGGGGAAGGGAGGGAGAAAAAGGGAAGAAGGGAGAGGAACAA	hap_01	hap_01	AA	4	NA	TT	NA	SINE/SINE
dalmatian	dalmatian	dog_20109	GAAAAAAAGGAGGGGAAGGGAGGGAGAAAAAGGGAAGAAGGGAGAGGAACAA	ATAAAAAAGGAGGGGAAGGGAGGGAGAAAAAGGGAAGAAGGGAGAGGAACAA	hap_06	hap_01	AA	4	NA	TT	NA	SINE/SINE
dalmatian	dalmatian	dog_20110	GAAAAAAAGGAGGGGAAGGGAGGGAGAAAAAGGGAAGAAGGGAGAGGAACAA	ATAAAAAAGGAGGGGAAGGGAGGGAGAAAAAGGGAAGAAGGGAGAGGAACAA	hap_06	hap_01	AA	4	NA	TT	NA	SINE/SINE
dalmatian	dalmatian	dog_20111	ATAAAAAAGGAGGGGAAGGGAGGGAGAAAAAGGGAAGAAGGGAGAGGAACAA	ATAAAAAAGGAGGGGAAGGGAGGGAGAAAAAGGGAAGAAGGGAGAGGAACAA	hap_01	hap_01	AA	4	NA	TT	NA	SINE/SINE
dalmatian	dalmatian	dog_20112	ATAAAAAAGGAGGGGAAGGGAGGGAGAAAAAGGGAAGAAGGGAGAGGAACAA	ATAAAAAAGGAGGGGAAGGGAGGGAGAAAAAGGGAAGAAGGGAGAGGAACAA	hap_01	hap_01	AA	4	NA	TT	NA	SINE/SINE
dalmatian	dalmatian	dog_20113	ATAAAAAAGGAGGGGAAGGGAGGGAGAAAAAGGGAAGAAGGGAGAGGAACAA	GAAAAAAAGGAGGGGAAGGGAGGGAGAAAAAGGGAAGAAGGGAGAGGAACAA	hap_01	hap_06	AA	4	NA	TT	NA	SINE/SINE
dalmatian	dalmatian	dog_20114	GAAAAAAAGGAGGGGAAGGGAGGGAGAAAAAGGGAAGAAGGGAGAGGAACAA	ATAAAAAAGGAGGGGAAGGGAGGGAGAAAAAGGGAAGAAGGGAGAGGAACAA	hap_06	hap_01	AA	4	NA	TT	NA	SINE/SINE
dalmatian	dalmatian	dog_20115	GAAAAAAAGGAGGGGAAGGGAGGGAGAAAAAGGGAAGAAGGGAGAGGAACAA	ATAAAAAAGGAGGGGAAGGGAGGGAGAAAAAGGGAAGAAGGGAGAGGAACAA	hap_06	hap_01	AA	4	NA	TT	NA	SINE/SINE
dalmatian	dalmatian	dog_20116	GAAAAAAAGGAGGGGAAGGGAGGGAGAAAAAGGGAAGAAGGGAGAGGAACAA	ATAAAAAAGGAGGGGAAGGGAGGGAGAAAAAGGGAAGAAGGGAGAGGAACAA	hap_06	hap_01	AA	4	NA	TT	NA	SINE/SINE
dalmatian	dalmatian	dog_20117	ATAAAAAAGGAGGGGAAGGGAGGGAGAAAAAGGGAAGAAGGGAGAGGAACAA	GAAAAAAAGGAGGGGAAGGGAGGGAGAAAAAGGGAAGAAGGGAGAGGAACAA	hap_01	hap_06	AA	4	NA	TT	NA	SINE/SINE
dalmatian	dalmatian	dog_20118	GAAAAAAAGGAGGGGAAGGGAGGGAGAAAAAGGGAAGAAGGGAGAGGAACAA	ATAAAAAAGGAGGGGAAGGGAGGGAGAAAAAGGGAAGAAGGGAGAGGAACAA	hap_06	hap_01	AA	4	NA	TT	NA	SINE/SINE
dalmatian	dalmatian	dog_20119	ATAAAAAAGGAGGGGAAGGGAGGGAGAAAAAGGGAAGAAGGGAGAGGAACAA	ATAAAAAAGGAGGGGAAGGGAGGGAGAAAAAGGGAAGAAGGGAGAGGAACAA	hap_01	hap_01	AA	4	NA	TT	NA	SINE/SINE
dalmatian	dalmatian	dog_20120	ATAAAAAAGGAGGGGAAGGGAGGGAGAAAAAGGGAAGAAGGGAGAGGAACAA	GAAAAAAAGGAGGGGAAGGGAGGGAGAAAAAGGGAAGAAGGGAGAGGAACAA	hap_01	hap_06	AA	4	NA	TT	NA	SINE/SINE
dalmatian	dalmatian	dog_20121	ATAAAAAAGGAGGGGAAGGGAGGGAGAAAAAGGGAAGAAGGGAGAGGAACAA	ATAAAAAAGGAGGGGAAGGGAGGGAGAAAAAGGGAAGAAGGGAGAGGAACAA	hap_01	hap_01	AA	4	NA	TT	NA	SINE/SINE
dalmatian	dalmatian	dog_20122	ATAAAAAAGGAGGGGAAGGGAGGGAGAAAAAGGGAAGAAGGGAGAGGAACAA	ATAAAAAAGGAGGGGAAGGGAGGGAGAAAAAGGGAAGAAGGGAGAGGAACAA	hap_01	hap_01	AA	4	NA	TT	NA	SINE/SINE
dalmatian	dalmatian	dog_20123	ATAAAAAAGGAGGGGAAGGGAGGGAGAAAAAGGGAAGAAGGGAGAGGAACAA	ATAAAAAAGGAGGGGAAGGGAGGGAGAAAAAGGGAAGAAGGGAGAGGAACAA	hap_01	hap_01	AA	4	NA	TT	NA	SINE/SINE
dalmatian	dalmatian	dog_20124	ATAGGGAGGAAGGGGAGAAGGGGGAGAAAAAGGGAAGAAGGGAGAGGAACAA	GAAAAAAAGGAGGGGAAGGGAGGGAGAAAAAGGGAAGAAGGGAGAGGAACAA	hap_d003	hap_06	GA	4	NA	0	NA	SINE/SINE
dalmatian	dalmatian	dog_20125	ATAAAAAAGGAGGGGAAGGGAGGGAGAAAAAGGGAAGAAGGGAGAGGAACAA	ATAAAAAAGGAGGGGAAGGGAGGGAGAAAAAGGGAAGAAGGGAGAGGAACAA	hap_01	hap_01	AA	4	NA	TT	NA	SINE/SINE
dalmatian	dalmatian	dog_20126	ATAAAAAAGGAGGGGAAGGGAGGGAGAAAAAGGGAAGAAGGGAGAGGAACAA	ATAAAAAAGGAGGGGAAGGGAGGGAGAAAAAGGGAAGAAGGGAGAGGAACAA	hap_01	hap_01	AA	4	1	TT	NA	SINE/SINE
dalmatian	dalmatian	dog_20127	ATAAAAAAGGAGGGGAAGGGAGGGAGAAAAAGGGAAGAAGGGAGAGGAACAA	ATAAAAAAGGAGGGGAAGGGAGGGAGAAAAAGGGAAGAAGGGAGAGGAACAA	hap_01	hap_01	AA	4	NA	TT	NA	SINE/SINE
dalmatian	dalmatian	dog_20128	ATAAAAAAGGAGGGGAAGGGAGGGAGAAAAAGGGAAGAAGGGAGAGGAACAA	ATAAAAAAGGAGGGGAAGGGAGGGAGAAAAAGGGAAGAAGGGAGAGGAACAA	hap_01	hap_01	AA	4	NA	TT	NA	SINE/SINE
dalmatian	dalmatian	dog_20129	ATAAAAAAGGAGGGGAAGGGAGGGAGAAAAAGGGAAGAAGGGAGAGGAACAA	ATAAAAAAGGAGGGGAAGGGAGGGAGAAAAAGGGAAGAAGGGAGAGGAACAA	hap_01	hap_01	AA	4	NA	TT	NA	SINE/SINE
dalmatian	dalmatian	dog_20130	ATAAAAAAGGAGGGGAAGGGAGGGAGAAAAAGGGAAGAAGGGAGAGGAACAA	GAAAAAAAGGAGGGGAAGGGAGGGAGAAAAAGGGAAGAAGGGAGAGGAACAA	hap_01	hap_06	AA	4	1	TT	NA	SINE/SINE
dalmatian	dalmatian	dog_20131	ATAAAAAAGGAGGGGAAGGGAGGGAGAAAAAGGGAAGAAGGGAGAGGAACAA	GAGAAAGAGAGGGGGGGGGGAGAGAGGGGAAGGGGAGAAGAGGGAGGAAAAG	hap_01	hap_v051	GA	3	NA	CT	NA	SINE/SINE
dalmatian	dalmatian	dog_20132	ATAAAAAAGGAGGGGAAGGGAGGGAGAAAAAGGGAAGAAGGGAGAGGAACAA	ATAAAAAAGGAGGGGAAGGGAGGGAGAAAAAGGGAAGAAGGGAGAGGAACAA	hap_01	hap_01	AA	4	NA	TT	NA	SINE/SINE
dalmatian	dalmatian	dog_20133	ATAAAAAAGGAGGGGAAGGGAGGGAGAAAAAGGGAAGAAGGGAGAGGAACAA	ATAGGGAGGAAGGGGAGAAGGGGGAGAAAAAGGGAAGAAGGGAGAGGAACAA	hap_01	hap_d003	GA	4	NA	0	NA	SINE/SINE
dalmatian	dalmatian	dog_20134	ATAAAAAAGGAGGGGAAGGGAGGGAGAAAAAGGGAAGAAGGGAGAGGAACAA	GAAAAAAAGGAGGGGAAGGGAGGGAGAAAAAGGGAAGAAGGGAGAGGAACAA	hap_01	hap_06	AA	4	NA	TT	NA	SINE/SINE
dalmatian	dalmatian	dog_20135	ATAAAAAAGGAGGGGAAGGGAGGGAGAAAAAGGGAAGAAGGGAGAGGAACAA	ATAAAAAAGGAGGGGAAGGGAGGGAGAAAAAGGGAAGAAGGGAGAGGAACAA	hap_01	hap_01	AA	4	NA	TT	NA	SINE/SINE
dalmatian	dalmatian	dog_20136	ATAGGGAGGAAGGGGAGAAGGGGGAGAAAAAGGGAAGAAGGGAGAGGAACAA	ATAAAAAAGGAGGGGAAGGGAGGGAGAAAAAGGGAAGAAGGGAGAGGAACAA	hap_d003	hap_01	GA	4	NA	0	NA	SINE/SINE
dalmatian	dalmatian	dog_20137	GAAAAAAAGGAGGGGAAGGGAGGGAGAAAAAGGGAAGAAGGGAGAGGAACAA	ATAAAAAAGGAGGGGAAGGGAGGGAGAAAAAGGGAAGAAGGGAGAGGAACAA	hap_06	hap_01	AA	4	NA	TT	NA	SINE/SINE
dalmatian	dalmatian	dog_20138	ATAAAAAAGGAGGGGAAGGGAGGGAGAAAAAGGGAAGAAGGGAGAGGAACAA	ATAAAAAAGGAGGGGAAGGGAGGGAGAAAAAGGGAAGAAGGGAGAGGAACAA	hap_01	hap_01	AA	4	NA	TT	NA	SINE/SINE
dalmatian	dalmatian	dog_20139	GAAAAAAAGGAGGGGAAGGGAGGGAGAAAAAGGGAAGAAGGGAGAGGAACAA	ATAAAAAAGGAGGGGAAGGGAGGGAGAAAAAGGGAAGAAGGGAGAGGAACAA	hap_06	hap_01	AA	4	NA	TT	NA	SINE/SINE
dalmatian	dalmatian	dog_20140	GAAAAAAAGGAGGGGAAGGGAGGGAGAAAAAGGGAAGAAGGGAGAGGAACAA	ATAAAAAAGGAGGGGAAGGGAGGGAGAAAAAGGGAAGAAGGGAGAGGAACAA	hap_06	hap_01	AA	4	NA	TT	NA	SINE/SINE
dalmatian	dalmatian	dog_20141	ATAAAAAAGGAGGGGAAGGGAGGGAGAAAAAGGGAAGAAGGGAGAGGAACAA	ATAAAAAAGGAGGGGAAGGGAGGGAGAAAAAGGGAAGAAGGGAGAGGAACAA	hap_01	hap_01	AA	4	NA	TT	NA	SINE/SINE
dalmatian	dalmatian	dog_20142	ATAAAAAAGGAGGGGAAGGGAGGGAGAAAAAGGGAAGAAGGGAGAGGAACAA	GAAAAAAAGGAGGGGAAGGGAGGGAGAAAAAGGGAAGAAGGGAGAGGAACAA	hap_01	hap_06	AA	4	NA	TT	NA	SINE/SINE
dalmatian	dalmatian	dog_20143	ATAAAAAAGGAGGGGAAGGGAGGGAGAAAAAGGGAAGAAGGGAGAGGAACAA	ATAAAAAAGGAGGGGAAGGGAGGGAGAAAAAGGGAAGAAGGGAGAGGAACAA	hap_01	hap_01	AA	4	NA	TT	NA	SINE/SINE
dalmatian	dalmatian	dog_20144	GAAAAAAAGGAGGGGAAGGGAGGGAGAAAAAGGGAAGAAGGGAGAGGAACAA	ATAAAAAAGGAGGGGAAGGGAGGGAGAAAAAGGGAAGAAGGGAGAGGAACAA	hap_06	hap_01	AA	4	NA	TT	NA	SINE/SINE
dalmatian	dalmatian	dog_20145	ATAAAAAAGGAGGGGAAGGGAGGGAGAAAAAGGGAAGAAGGGAGAGGAACAA	ATAAAAAAGGAGGGGAAGGGAGGGAGAAAAAGGGAAGAAGGGAGAGGAACAA	hap_01	hap_01	AA	4	NA	TT	NA	SINE/SINE
dalmatian	dalmatian	dog_20146	ATAAAAAAGGAGGGGAAGGGAGGGAGAAAAAGGGAAGAAGGGAGAGGAACAA	ATAAAAAAGGAGGGGAAGGGAGGGAGAAAAAGGGAAGAAGGGAGAGGAACAA	hap_01	hap_01	AA	4	NA	TT	NA	SINE/SINE
dalmatian	dalmatian	dog_20147	ATAAAAAAGGAGGGGAAGGGAGGGAGAAAAAGGGAAGAAGGGAGAGGAACAA	GAAAAAAAGGAGGGGAAGGGAGGGAGAAAAAGGGAAGAAGGGAGAGGAACAA	hap_01	hap_06	AA	4	NA	TT	NA	SINE/SINE
dalmatian	dalmatian	dog_20148	ATAAAAAAGGAGGGGAAGGGAGGGAGAAAAAGGGAAGAAGGGAGAGGAACAA	ATAAAAAAGGAGGGGAAGGGAGGGAGAAAAAGGGAAGAAGGGAGAGGAACAA	hap_01	hap_01	AA	4	NA	TT	NA	SINE/SINE
dalmatian	dalmatian	dog_20149	ATAAAAAAGGAGGGGAAGGGAGGGAGAAAAAGGGAAGAAGGGAGAGGAACAA	ATAAAAAAGGAGGGGAAGGGAGGGAGAAAAAGGGAAGAAGGGAGAGGAACAA	hap_01	hap_01	AA	4	NA	TT	NA	SINE/SINE
dalmatian	dalmatian	dog_20150	ATAAAAAAGGAGGGGAAGGGAGGGAGAAAAAGGGAAGAAGGGAGAGGAACAA	ATAAAAAAGGAGGGGAAGGGAGGGAGAAAAAGGGAAGAAGGGAGAGGAACAA	hap_01	hap_01	AA	4	NA	TT	NA	SINE/SINE
dalmatian	dalmatian	dog_20151	ATAGGGAGGAAGGGGAGAAGGGGGAGAAAAAGGGAAGAAGGGAGAGGAACAA	ATAGGGAGGAAGGGGAGAAGGGGGAGAAAAAGGGAAGAAGGGAGAGGAACAA	hap_d003	hap_d003	GG	4	1	0	NA	SINE/SINE
dalmatian	dalmatian	dog_20152	ATAAAAAAGGAGGGGAAGGGAGGGAGAAAAAGGGAAGAAGGGAGAGGAACAA	ATAAAAAAGGAGGGGAAGGGAGGGAGAAAAAGGGAAGAAGGGAGAGGAACAA	hap_01	hap_01	AA	4	NA	TT	NA	SINE/SINE
dalmatian	dalmatian	dog_20153	ATAGGGAGGAAGGGGAGAAGGGGGAGAAAAAGGGAAGAAGGGAGAGGAACAA	ATAGGGAGGAAGGGGAGAAGGGGGAGAAAAAGGGAAGAAGGGAGAGGAACAA	hap_d003	hap_d003	GG	4	1	0	NA	SINE/SINE
dalmatian	dalmatian	dog_20154	ATAGGGAGGAAGGGGAGAAGGGGGAGAAAAAGGGAAGAAGGGAGAGGAACAA	GAAAAAAAGGAGGGGAAGGGAGGGAGAAAAAGGGAAGAAGGGAGAGGAACAA	hap_d003	hap_06	GA	4	NA	0	NA	SINE/SINE
dalmatian	dalmatian	dog_20155	ATAAAAAAGGAGGGGAAGGGAGGGAGAAAAAGGGAAGAAGGGAGAGGAACAA	GAAAAAAAGGAGGGGAAGGGAGGGAGAAAAAGGGAAGAAGGGAGAGGAACAA	hap_01	hap_06	AA	4	NA	TT	NA	SINE/SINE
dalmatian	dalmatian	dog_20156	ATAAAAAAGGAGGGGAAGGGAGGGAGAAAAAGGGAAGAAGGGAGAGGAACAA	ATAAAAAAGGAGGGGAAGGGAGGGAGAAAAAGGGAAGAAGGGAGAGGAACAA	hap_01	hap_01	AA	4	NA	TT	NA	SINE/SINE
dalmatian	dalmatian	dog_20157	ATAAAAAAGGAGGGGAAGGGAGGGAGAAAAAGGGAAGAAGGGAGAGGAACAA	ATAAAAAAGGAGGGGAAGGGAGGGAGAAAAAGGGAAGAAGGGAGAGGAACAA	hap_01	hap_01	AA	4	NA	TT	NA	SINE/SINE
dalmatian	dalmatian	dog_20158	ATAAAAAAGGAGGGGAAGGGAGGGAGAAAAAGGGAAGAAGGGAGAGGAACAA	ATAAAAAAGGAGGGGAAGGGAGGGAGAAAAAGGGAAGAAGGGAGAGGAACAA	hap_01	hap_01	AA	4	NA	TT	NA	SINE/SINE
dalmatian	dalmatian	dog_20159	AAAGGGAGGAAGGGGAGAAGGGGGAGAAAAAGGGAAGAAGGGAGAGGAACAA	ATAAAAAAGGAGGGGAAGGGAGGGAGAAAAAGGGAAGAAGGGAGAGGAACAA	hap_d001	hap_01	GA	4	NA	0	NA	SINE/SINE
dalmatian	dalmatian	dog_20160	ATAGGGAGGAAGGGGAGAAGGGGGAGAAAAAGGGAAGAAGGGAGAGGAACAA	ATAGGGAGGAAGGGGAGAAGGGGGAGAAAAAGGGAAGAAGGGAGAGGAACAA	hap_d003	hap_d003	GG	4	NA	0	NA	SINE/SINE
dalmatian	dalmatian	dog_20161	ATAGGGAGGAAGGGGAGAAGGGGGAGAAAAAGGGAAGAAGGGAGAGGAACAA	ATAAAAAAGGAGGGGAAGGGAGGGAGAAAAAGGGAAGAAGGGAGAGGAACAA	hap_d003	hap_01	GA	4	NA	0	NA	SINE/SINE
dalmatian	dalmatian	dog_20162	GAAAAAAAGGAGGGGAAGGGAGGGAGAAAAAGGGAAGAAGGGAGAGGAACAA	ATAAAAAAGGAGGGGAAGGGAGGGAGAAAAAGGGAAGAAGGGAGAGGAACAA	hap_06	hap_01	AA	4	NA	TT	NA	SINE/SINE
dalmatian	dalmatian	dog_20163	ATAAAAAAGGAGGGGAAGGGAGGGAGAAAAAGGGAAGAAGGGAGAGGAACAA	ATAAAAAAGGAGGGGAAGGGAGGGAGAAAAAGGGAAGAAGGGAGAGGAACAA	hap_01	hap_01	AA	4	NA	TT	NA	SINE/SINE
dalmatian	dalmatian	dog_20164	ATAAAAAAGGAGGGGAAGGGAGGGAGAAAAAGGGAAGAAGGGAGAGGAACAA	GAAAAAAAGGAGGGGAAGGGAGGGAGAAAAAGGGAAGAAGGGAGAGGAACAA	hap_01	hap_06	AA	4	NA	TT	NA	SINE/SINE
dalmatian	dalmatian	dog_20165	GAAAAAAAGGAGGGGAAGGGAGGGAGAAAAAGGGAAGAAGGGAGAGGAACAA	ATAAAAAAGGAGGGGAAGGGAGGGAGAAAAAGGGAAGAAGGGAGAGGAACAA	hap_06	hap_01	AA	4	NA	TT	NA	SINE/SINE
dalmatian	dalmatian	dog_20166	ATAGGGAGGAAGGGGAGAAGGGGGAGAAAAAGGGAAGAAGGGAGAGGAACAA	ATAAAAAAGGAGGGGAAGGGAGGGAGAAAAAGGGAAGAAGGGAGAGGAACAA	hap_d003	hap_01	GA	4	NA	0	NA	SINE/SINE
dalmatian	dalmatian	dog_20167	GAAAAAAAGGAGGGGAAGGGAGGGAGAAAAAGGGAAGAAGGGAGAGGAACAA	ATAAAAAAGGAGGGGAAGGGAGGGAGAAAAAGGGAAGAAGGGAGAGGAACAA	hap_06	hap_01	AA	4	NA	TT	NA	SINE/SINE
dalmatian	dalmatian	dog_20168	ATAAAAAAGGAGGGGAAGGGAGGGAGAAAAAGGGAAGAAGGGAGAGGAACAA	GAAAAAAAGGAGGGGAAGGGAGGGAGAAAAAGGGAAGAAGGGAGAGGAACAA	hap_01	hap_06	AA	4	NA	TT	NA	SINE/SINE
dalmatian	dalmatian	dog_20169	ATAAAAAAGGAGGGGAAGGGAGGGAGAAAAAGGGAAGAAGGGAGAGGAACAA	ATAAAAAAGGAGGGGAAGGGAGGGAGAAAAAGGGAAGAAGGGAGAGGAACAA	hap_01	hap_01	AA	4	NA	TT	NA	SINE/SINE
dalmatian	dalmatian	dog_20170	ATAGGGAGGAAGGGGAGAAGGGGGAGAAAAAGGGAAGAAGGGAGAGGAACAA	ATAAAAAAGGAGGGGAAGGGAGGGAGAAAAAGGGAAGAAGGGAGAGGAACAA	hap_d003	hap_01	GA	4	NA	0	NA	SINE/SINE
dalmatian	dalmatian	dog_20171	ATAAAAAAGGAGGGGAAGGGAGGGAGAAAAAGGGAAGAAGGGAGAGGAACAA	GAAAAAAAGGAGGGGAAGGGAGGGAGAAAAAGGGAAGAAGGGAGAGGAACAA	hap_01	hap_06	AA	4	NA	TT	NA	SINE/SINE
dalmatian	dalmatian	dog_20172	ATAGGGAGGAAGGGGAGAAGGGGGAGAAAAAGGGAAGAAGGGAGAGGAACAA	ATAGGGAGGAAGGGGAGAAGGGGGAGAAAAAGGGAAGAAGGGAGAGGAACAA	hap_d003	hap_d003	GG	4	1	0	NA	SINE/SINE
dalmatian	dalmatian	dog_20173	ATAAAAAAGGAGGGGAAGGGAGGGAGAAAAAGGGAAGAAGGGAGAGGAACAA	ATAGGGAGGAAGGGGAGAAGGGGGAGAAAAAGGGAAGAAGGGAGAGGAACAA	hap_01	hap_d003	GA	4	NA	0	NA	SINE/SINE
dalmatian	dalmatian	dog_20174	ATAAAAAAGGAGGGGAAGGGAGGGAGAAAAAGGGAAGAAGGGAGAGGAACAA	GAAAAAAAGGAGGGGAAGGGAGGGAGAAAAAGGGAAGAAGGGAGAGGAACAA	hap_01	hap_06	AA	4	NA	TT	NA	SINE/SINE
dalmatian	dalmatian	dog_20175	ATAAAAAAGGAGGGGAAGGGAGGGAGAAAAAGGGAAGAAGGGAGAGGAACAA	ATAAAAAAGGAGGGGAAGGGAGGGAGAAAAAGGGAAGAAGGGAGAGGAACAA	hap_01	hap_01	AA	4	NA	TT	NA	SINE/SINE
dalmatian	dalmatian	dog_20176	ATAAAAAAGGAGGGGAAGGGAGGGAGAAAAAGGGAAGAAGGGAGAGGAACAA	ATAAAAAAGGAGGGGAAGGGAGGGAGAAAAAGGGAAGAAGGGAGAGGAACAA	hap_01	hap_01	AA	4	NA	TT	NA	SINE/SINE
dalmatian	dalmatian	dog_20177	GAAAAAAAGGAGGGGAAGGGAGGGAGAAAAAGGGAAGAAGGGAGAGGAACAA	ATAGGGAGGAAGGGGAGAAGGGGGAGAAAAAGGGAAGAAGGGAGAGGAACAA	hap_06	hap_d003	GA	4	NA	0	NA	SINE/SINE
dalmatian	dalmatian	dog_20178	ATAAAAAAGGAGGGGAAGGGAGGGAGAAAAAGGGAAGAAGGGAGAGGAACAA	GAAAAAAAGGAGGGGAAGGGAGGGAGAAAAAGGGAAGAAGGGAGAGGAACAA	hap_01	hap_06	AA	4	NA	TT	NA	SINE/SINE
dalmatian	dalmatian	dog_20179	ATAGGGAGGAAGGGGAAGGGAGGGAGAAAAAGGGAAGAAGGGAGAGGAACAA	ATAAAAAAGGAGGGGAAGGGAGGGAGAAAAAGGGAAGAAGGGAGAGGAACAA	hap_d002	hap_01	AA	4	NA	TT	NA	SINE/SINE
dalmatian	dalmatian	dog_20180	ATAGGGAGGAAGGGGAGAAGGGGGAGAAAAAGGGAAGAAGGGAGAGGAACAA	ATAAAAAAGGAGGGGAAGGGAGGGAGAAAAAGGGAAGAAGGGAGAGGAACAA	hap_d003	hap_01	GA	4	NA	0	NA	SINE/SINE
dalmatian	dalmatian	dog_20181	ATAAAAAAGGAGGGGAAGGGAGGGAGAAAAAGGGAAGAAGGGAGAGGAACAA	GAAAAAAAGGAGGGGAAGGGAGGGAGAAAAAGGGAAGAAGGGAGAGGAACAA	hap_01	hap_06	AA	4	NA	TT	NA	SINE/SINE
dalmatian	dalmatian	dog_20182	ATAAAAAAGGAGGGGAAGGGAGGGAGAAAAAGGGAAGAAGGGAGAGGAACAA	ATAAAAAAGGAGGGGAAGGGAGGGAGAAAAAGGGAAGAAGGGAGAGGAACAA	hap_01	hap_01	AA	4	NA	TT	NA	SINE/SINE
dalmatian	dalmatian	dog_20183	ATAAAAAAGGAGGGGAAGGGAGGGAGAAAAAGGGAAGAAGGGAGAGGAACAA	ATAAAAAAGGAGGGGAAGGGAGGGAGAAAAAGGGAAGAAGGGAGAGGAACAA	hap_01	hap_01	AA	4	NA	TT	NA	SINE/SINE
dalmatian	dalmatian	dog_20184	GAAAAAAAGGAGGGGAAGGGAGGGAGAAAAAGGGAAGAAGGGAGAGGAACAA	ATAAAAAAGGAGGGGAAGGGAGGGAGAAAAAGGGAAGAAGGGAGAGGAACAA	hap_06	hap_01	AA	4	NA	TT	NA	SINE/SINE
dalmatian	dalmatian	dog_20185	ATAAAAAAGGAGGGGAAGGGAGGGAGAAAAAGGGAAGAAGGGAGAGGAACAA	ATAGGGAGGAAGGGGAAGGGAGGGAGAAAAAGGGAAGAAGGGAGAGGAACAA	hap_01	hap_d002	AA	4	NA	TT	NA	SINE/SINE
dalmatian	dalmatian	dog_20186	ATAAAAAAGGAGGGGAAGGGAGGGAGAAAAAGGGAAGAAGGGAGAGGAACAA	ATAAAAAAGGAGGGGAAGGGAGGGAGAAAAAGGGAAGAAGGGAGAGGAACAA	hap_01	hap_01	AA	4	NA	TT	NA	SINE/SINE
dalmatian	dalmatian	dog_20187	ATAAAAAAGGAGGGGAAGGGAGGGAGAAAAAGGGAAGAAGGGAGAGGAACAA	ATAAAAAAGGAGGGGAAGGGAGGGAGAAAAAGGGAAGAAGGGAGAGGAACAA	hap_01	hap_01	AA	4	NA	TT	NA	SINE/SINE
dalmatian	dalmatian	dog_20188	ATAAAAAAGGAGGGGAAGGGAGGGAGAAAAAGGGAAGAAGGGAGAGGAACAA	ATAAAAAAGGAGGGGAAGGGAGGGAGAAAAAGGGAAGAAGGGAGAGGAACAA	hap_01	hap_01	AA	4	NA	TT	NA	SINE/SINE
dalmatian	dalmatian	dog_20189	ATAAAAAAGGAGGGGAAGGGAGGGAGAAAAAGGGAAGAAGGGAGAGGAACAA	GAAAAAAAGGAGGGGAAGGGAGGGAGAAAAAGGGAAGAAGGGAGAGGAACAA	hap_01	hap_06	AA	4	NA	TT	NA	SINE/SINE
dalmatian	dalmatian	dog_20190	ATAAAAAAGGAGGGGAAGGGAGGGAGAAAAAGGGAAGAAGGGAGAGGAACAA	ATAAAAAAGGAGGGGAAGGGAGGGAGAAAAAGGGAAGAAGGGAGAGGAACAA	hap_01	hap_01	AA	4	NA	TT	NA	SINE/SINE
dalmatian	dalmatian	dog_20191	ATAAAAAAGGAGGGGAAGGGAGGGAGAAAAAGGGAAGAAGGGAGAGGAACAA	ATAAAAAAGGAGGGGAAGGGAGGGAGAAAAAGGGAAGAAGGGAGAGGAACAA	hap_01	hap_01	AA	4	NA	TT	NA	SINE/SINE
dalmatian	dalmatian	dog_20192	ATAAAAAAGGAGGGGAAGGGAGGGAGAAAAAGGGAAGAAGGGAGAGGAACAA	ATAAAAAAGGAGGGGAAGGGAGGGAGAAAAAGGGAAGAAGGGAGAGGAACAA	hap_01	hap_01	AA	4	NA	TT	NA	SINE/SINE
dalmatian	dalmatian	dog_20193	GAAAAAAAGGAGGGGAAGGGAGGGAGAAAAAGGGAAGAAGGGAGAGGAACAA	ATAAAAAAGGAGGGGAAGGGAGGGAGAAAAAGGGAAGAAGGGAGAGGAACAA	hap_06	hap_01	AA	4	NA	TT	NA	SINE/SINE
dalmatian	dalmatian	dog_20194	ATAAAAAAGGAGGGGAAGGGAGGGAGAAAAAGGGAAGAAGGGAGAGGAACAA	ATAAAAAAGGAGGGGAAGGGAGGGAGAAAAAGGGAAGAAGGGAGAGGAACAA	hap_01	hap_01	AA	4	NA	TT	NA	SINE/SINE
dalmatian	dalmatian	dog_20195	ATAAAAAAGGAGGGGAAGGGAGGGAGAAAAAGGGAAGAAGGGAGAGGAACAA	ATAAAAAAGGAGGGGAAGGGAGGGAGAAAAAGGGAAGAAGGGAGAGGAACAA	hap_01	hap_01	AA	4	NA	TT	NA	SINE/SINE
dalmatian	dalmatian	dog_20196	ATAAAAAAGGAGGGGAAGGGAGGGAGAAAAAGGGAAGAAGGGAGAGGAACAA	ATAAAAAAGGAGGGGAAGGGAGGGAGAAAAAGGGAAGAAGGGAGAGGAACAA	hap_01	hap_01	AA	4	NA	TT	NA	SINE/SINE
dalmatian	dalmatian	dog_20197	ATAAAAAAGGAGGGGAAGGGAGGGAGAAAAAGGGAAGAAGGGAGAGGAACAA	ATAAAAAAGGAGGGGAAGGGAGGGAGAAAAAGGGAAGAAGGGAGAGGAACAA	hap_01	hap_01	AA	4	NA	TT	NA	SINE/SINE
dalmatian	dalmatian	dog_20198	ATAAAAAAGGAGGGGAAGGGAGGGAGAAAAAGGGAAGAAGGGAGAGGAACAA	ATAAAAAAGGAGGGGAAGGGAGGGAGAAAAAGGGAAGAAGGGAGAGGAACAA	hap_01	hap_01	AA	4	NA	TT	NA	SINE/SINE
dalmatian	dalmatian	dog_20199	ATAAAAAAGGAGGGGAAGGGAGGGAGAAAAAGGGAAGAAGGGAGAGGAACAA	ATAAAAAAGGAGGGGAAGGGAGGGAGAAAAAGGGAAGAAGGGAGAGGAACAA	hap_01	hap_01	AA	4	NA	TT	NA	SINE/SINE
dalmatian	dalmatian	dog_20200	ATAAAAAAGGAGGGGAAGGGAGGGAGAAAAAGGGAAGAAGGGAGAGGAACAA	ATAAAAAAGGAGGGGAAGGGAGGGAGAAAAAGGGAAGAAGGGAGAGGAACAA	hap_01	hap_01	AA	4	NA	TT	NA	SINE/SINE
dalmatian	dalmatian	dog_20201	ATAAAAAAGGAGGGGAAGGGAGGGAGAAAAAGGGAAGAAGGGAGAGGAACAA	GAAAAAAAGGAGGGGAAGGGAGGGAGAAAAAGGGAAGAAGGGAGAGGAACAA	hap_01	hap_06	AA	4	NA	TT	NA	SINE/SINE
dalmatian	dalmatian	dog_20202	ATAGGGAGGAAGGGGAGAAGGGGGAGAAAAAGGGAAGAAGGGAGAGGAACAA	ATAAAAAAGGAGGGGAAGGGAGGGAGAAAAAGGGAAGAAGGGAGAGGAACAA	hap_d003	hap_01	GA	4	NA	0	NA	SINE/SINE
dalmatian	dalmatian	dog_20203	ATAAAAAAGGAGGGGAAGGGAGGGAGAAAAAGGGAAGAAGGGAGAGGAACAA	ATAGGGAGGAAGGGGAGAAGGGGGAGAAAAAGGGAAGAAGGGAGAGGAACAA	hap_01	hap_d003	GA	4	NA	0	NA	SINE/SINE
dalmatian	dalmatian	dog_20204	ATAAAAAAGGAGGGGAAGGGAGGGAGAAAAAGGGAAGAAGGGAGAGGAACAA	ATAAAAAAGGAGGGGAAGGGAGGGAGAAAAAGGGAAGAAGGGAGAGGAACAA	hap_01	hap_01	AA	4	NA	TT	NA	SINE/SINE
dalmatian	dalmatian	dog_20205	ATAAAAAAGGAGGGGAAGGGAGGGAGAAAAAGGGAAGAAGGGAGAGGAACAA	ATAGGGAGGAAGGGGAGAAGGGGGAGAAAAAGGGAAGAAGGGAGAGGAACAA	hap_01	hap_d003	GA	4	NA	0	NA	SINE/SINE
dalmatian	dalmatian	dog_20206	ATAAAAAAGGAGGGGAAGGGAGGGAGAAAAAGGGAAGAAGGGAGAGGAACAA	GAAAAAAAGGAGGGGAAGGGAGGGAGAAAAAGGGAAGAAGGGAGAGGAACAA	hap_01	hap_06	AA	4	NA	TT	NA	SINE/SINE
dalmatian	dalmatian	dog_20207	ATAAAAAAGGAGGGGAAGGGAGGGAGAAAAAGGGAAGAAGGGAGAGGAACAA	ATAAAAAAGGAGGGGAAGGGAGGGAGAAAAAGGGAAGAAGGGAGAGGAACAA	hap_01	hap_01	AA	4	NA	TT	NA	SINE/SINE
dalmatian	dalmatian	dog_20208	ATAAAAAAGGAGGGGAAGGGAGGGAGAAAAAGGGAAGAAGGGAGAGGAACAA	ATAAAAAAGGAGGGGAAGGGAGGGAGAAAAAGGGAAGAAGGGAGAGGAACAA	hap_01	hap_01	AA	4	NA	TT	NA	SINE/SINE
dalmatian	dalmatian	dog_20209	ATAAAAAAGGAGGGGAAGGGAGGGAGAAAAAGGGAAGAAGGGAGAGGAACAA	GAAAAAAAGGAGGGGAAGGGAGGGAGAAAAAGGGAAGAAGGGAGAGGAACAA	hap_01	hap_06	AA	4	NA	TT	NA	SINE/SINE
dalmatian	dalmatian	dog_20210	ATAAAAAAGGAGGGGAAGGGAGGGAGAAAAAGGGAAGAAGGGAGAGGAACAA	ATAAAAAAGGAGGGGAAGGGAGGGAGAAAAAGGGAAGAAGGGAGAGGAACAA	hap_01	hap_01	AA	4	NA	TT	NA	SINE/SINE
dalmatian	dalmatian	dog_20211	GAAAAAAAGGAGGGGAAGGGAGGGAGAAAAAGGGAAGAAGGGAGAGGAACAA	ATAAAAAAGGAGGGGAAGGGAGGGAGAAAAAGGGAAGAAGGGAGAGGAACAA	hap_06	hap_01	AA	4	NA	TT	NA	SINE/SINE
dalmatian	dalmatian	dog_20212	ATAAAAAAGGAGGGGAAGGGAGGGAGAAAAAGGGAAGAAGGGAGAGGAACAA	ATAAAAAAGGAGGGGAAGGGAGGGAGAAAAAGGGAAGAAGGGAGAGGAACAA	hap_01	hap_01	AA	4	NA	TT	NA	SINE/SINE
dalmatian	dalmatian	dog_20213	ATAAAAAAGGAGGGGAAGGGAGGGAGAAAAAGGGAAGAAGGGAGAGGAACAA	ATAAAAAAGGAGGGGAAGGGAGGGAGAAAAAGGGAAGAAGGGAGAGGAACAA	hap_01	hap_01	AA	4	NA	TT	NA	SINE/SINE
dalmatian	dalmatian	dog_20214	ATAAAAAAGGAGGGGAAGGGAGGGAGAAAAAGGGAAGAAGGGAGAGGAACAA	GAAAAAAAGGAGGGGGGGAGAGGGAGAAAAAGGGAAGAAGGGAGAGGAACAA	hap_01	hap_v024	GA	3	NA	CT	NA	SINE/SINE
dalmatian	dalmatian	dog_20215	ATAAAAAAGGAGGGGAAGGGAGGGAGAAAAAGGGAAGAAGGGAGAGGAACAA	ATAAAAAAGGAGGGGAAGGGAGGGAGAAAAAGGGAAGAAGGGAGAGGAACAA	hap_01	hap_01	AA	4	NA	TT	NA	SINE/SINE
dalmatian	dalmatian	dog_20216	ATAGGGAGGAAGGGGAGAAGGGGGAGAAAAAGGGAAGAAGGGAGAGGAACAA	ATAAAAAAGGAGGGGAAGGGAGGGAGAAAAAGGGAAGAAGGGAGAGGAACAA	hap_d003	hap_01	GA	4	NA	0	NA	SINE/SINE
dalmatian	dalmatian	dog_20217	ATAAAAAAGGAGGGGAAGGGAGGGAGAAAAAGGGAAGAAGGGAGAGGAACAA	GAAAAAAAGGAGGGGAAGGGAGGGAGAAAAAGGGAAGAAGGGAGAGGAACAA	hap_01	hap_06	AA	4	NA	TT	NA	SINE/SINE
dalmatian	dalmatian	dog_20218	GAAAAAAAGGAGGGGAAGGGAGGGAGAAAAAGGGAAGAAGGGAGAGGAACAA	GAAAAAAAGGAGGGGAAGGGAGGGAGAAAAAGGGAAGAAGGGAGAGGAACAA	hap_06	hap_06	AA	4	NA	TT	NA	SINE/SINE
dalmatian	dalmatian	dog_20219	ATAAAAAAGGAGGGGAAGGGAGGGAGAAAAAGGGAAGAAGGGAGAGGAACAA	ATAAAAAAGGAGGGGAAGGGAGGGAGAAAAAGGGAAGAAGGGAGAGGAACAA	hap_01	hap_01	AA	4	NA	TT	NA	SINE/SINE
dalmatian	dalmatian	dog_20220	ATAAAAAAGGAGGGGAAGGGAGGGAGAAAAAGGGAAGAAGGGAGAGGAACAA	ATAAAAAAGGAGGGGAAGGGAGGGAGAAAAAGGGAAGAAGGGAGAGGAACAA	hap_01	hap_01	AA	4	NA	TT	NA	SINE/SINE
dalmatian	dalmatian	dog_20221	ATAAAAAAGGAGGGGAAGGGAGGGAGAAAAAGGGAAGAAGGGAGAGGAACAA	ATAAAAAAGGAGGGGAAGGGAGGGAGAAAAAGGGAAGAAGGGAGAGGAACAA	hap_01	hap_01	AA	4	NA	TT	NA	SINE/SINE
dalmatian	dalmatian	dog_20222	GAAAAAAAGGAGGGGAAGGGAGGGAGAAAAAGGGAAGAAGGGAGAGGAACAA	GAAAAAAAGGAGGGGAAGGGAGGGAGAAAAAGGGAAGAAGGGAGAGGAACAA	hap_06	hap_06	AA	4	NA	TT	NA	SINE/SINE
dalmatian	dalmatian	dog_20223	ATAAAAAAGGAGGGGAAGGGAGGGAGAAAAAGGGAAGAAGGGAGAGGAACAA	ATAGGGAGGAAGGGGAGAAGGGGGAGAAAAAGGGAAGAAGGGAGAGGAACAA	hap_01	hap_d003	GA	4	NA	0	NA	SINE/SINE
dalmatian	dalmatian	dog_20224	ATAAAAAAGGAGGGGAAGGGAGGGAGAAAAAGGGAAGAAGGGAGAGGAACAA	ATAAAAAAGGAGGGGAAGGGAGGGAGAAAAAGGGAAGAAGGGAGAGGAACAA	hap_01	hap_01	AA	4	NA	TT	NA	SINE/SINE
dalmatian	dalmatian	dog_20225	ATAAAAAAGGAGGGGAAGGGAGGGAGAAAAAGGGAAGAAGGGAGAGGAACAA	ATAAAAAAGGAGGGGAAGGGAGGGAGAAAAAGGGAAGAAGGGAGAGGAACAA	hap_01	hap_01	AA	4	NA	TT	NA	SINE/SINE
dalmatian	dalmatian	dog_20226	ATAAAAAAGGAGGGGAAGGGAGGGAGAAAAAGGGAAGAAGGGAGAGGAACAA	ATAGGGAGGAAGGGGAGAAGGGGGAGAAAAAGGGAAGAAGGGAGAGGAACAA	hap_01	hap_d003	GA	4	NA	0	NA	SINE/SINE
dalmatian	dalmatian	dog_20227	ATAAAAAAGGAGGGGAAGGGAGGGAGAAAAAGGGAAGAAGGGAGAGGAACAA	ATAAAAAAGGAGGGGAAGGGAGGGAGAAAAAGGGAAGAAGGGAGAGGAACAA	hap_01	hap_01	AA	4	NA	TT	NA	SINE/SINE
dalmatian	dalmatian	dog_20228	ATAAAAAAGGAGGGGAAGGGAGGGAGAAAAAGGGAAGAAGGGAGAGGAACAA	ATAAAAAAGGAGGGGAAGGGAGGGAGAAAAAGGGAAGAAGGGAGAGGAACAA	hap_01	hap_01	AA	4	NA	TT	NA	SINE/SINE
dalmatian	dalmatian	dog_20229	GAAAAAAAGGAGGGGAAGGGAGGGAGAAAAAGGGAAGAAGGGAGAGGAACAA	ATAAAAAAGGAGGGGAAGGGAGGGAGAAAAAGGGAAGAAGGGAGAGGAACAA	hap_06	hap_01	AA	4	NA	TT	NA	SINE/SINE
dalmatian	dalmatian	dog_20230	ATAAAAAAGGAGGGGAAGGGAGGGAGAAAAAGGGAAGAAGGGAGAGGAACAA	GAAAAAAAGGAGGGGAAGGGAGGGAGAAAAAGGGAAGAAGGGAGAGGAACAA	hap_01	hap_06	AA	4	NA	TT	NA	SINE/SINE
dalmatian	dalmatian	dog_20231	ATAAAAAAGGAGGGGAAGGGAGGGAGAAAAAGGGAAGAAGGGAGAGGAACAA	GAAAAAAAGGAGGGGAAGGGAGGGAGAAAAAGGGAAGAAGGGAGAGGAACAA	hap_01	hap_06	AA	4	NA	TT	NA	SINE/SINE
dalmatian	dalmatian	dog_20232	GAAAAAAAGGAGGGGAAGGGAGGGAGAAAAAGGGAAGAAGGGAGAGGAACAA	ATAAAAAAGGAGGGGAAGGGAGGGAGAAAAAGGGAAGAAGGGAGAGGAACAA	hap_06	hap_01	AA	4	NA	TT	NA	SINE/SINE
dalmatian	dalmatian	dog_20233	GAAAAAAAGGAGGGGAAGGGAGGGAGAAAAAGGGAAGAAGGGAGAGGAACAA	ATAAAAAAGGAGGGGAAGGGAGGGAGAAAAAGGGAAGAAGGGAGAGGAACAA	hap_06	hap_01	AA	4	NA	TT	NA	SINE/SINE
dalmatian	dalmatian	dog_20234	ATAAAAAAGGAGGGGAAGGGAGGGAGAAAAAGGGAAGAAGGGAGAGGAACAA	ATAAAAAAGGAGGGGAAGGGAGGGAGAAAAAGGGAAGAAGGGAGAGGAACAA	hap_01	hap_01	AA	4	NA	TT	NA	SINE/SINE
dalmatian	dalmatian	dog_20235	ATAAAAAAGGAGGGGAAGGGAGGGAGAAAAAGGGAAGAAGGGAGAGGAACAA	GAAAAAAAGGAGGGGAAGGGAGGGAGAAAAAGGGAAGAAGGGAGAGGAACAA	hap_01	hap_06	AA	4	NA	TT	NA	SINE/SINE
dalmatian	dalmatian	dog_20236	ATAGGGAGGAAGGGGAGAAGGGGGAGAAAAAGGGAAGAAGGGAGAGGAACAA	GAAAAAAAGGAGGGGAAGGGAGGGAGAAAAAGGGAAGAAGGGAGAGGAACAA	hap_d003	hap_06	GA	4	NA	0	NA	SINE/SINE
dalmatian	dalmatian	dog_20237	ATAAAAAAGGAGGGGAAGGGAGGGAGAAAAAGGGAAGAAGGGAGAGGAACAA	ATAAAAAAGGAGGGGAAGGGAGGGAGAAAAAGGGAAGAAGGGAGAGGAACAA	hap_01	hap_01	AA	4	NA	TT	NA	SINE/SINE
dalmatian	dalmatian	dog_20238	ATAAAAAAGGAGGGGAAGGGAGGGAGAAAAAGGGAAGAAGGGAGAGGAACAA	ATAAAAAAGGAGGGGAAGGGAGGGAGAAAAAGGGAAGAAGGGAGAGGAACAA	hap_01	hap_01	AA	4	NA	TT	NA	SINE/SINE
dalmatian	dalmatian	dog_20239	ATAAAAAAGGAGGGGAAGGGAGGGAGAAAAAGGGAAGAAGGGAGAGGAACAA	ATAAAAAAGGAGGGGAAGGGAGGGAGAAAAAGGGAAGAAGGGAGAGGAACAA	hap_01	hap_01	AA	4	NA	TT	NA	SINE/SINE
dalmatian	dalmatian	dog_20240	ATAAAAAAGGAGGGGAAGGGAGGGAGAAAAAGGGAAGAAGGGAGAGGAACAA	GAAAAAAAGGAGGGGAAGGGAGGGAGAAAAAGGGAAGAAGGGAGAGGAACAA	hap_01	hap_06	AA	4	NA	TT	NA	SINE/SINE
dalmatian	dalmatian	dog_20241	GAAAAAAAGGAGGGGAAGGGAGGGAGAAAAAGGGAAGAAGGGAGAGGAACAA	ATAAAAAAGGAGGGGAAGGGAGGGAGAAAAAGGGAAGAAGGGAGAGGAACAA	hap_06	hap_01	AA	4	NA	TT	NA	SINE/SINE
dalmatian	dalmatian	dog_20242	ATAAAAAAGGAGGGGAAGGGAGGGAGAAAAAGGGAAGAAGGGAGAGGAACAA	ATAAAAAAGGAGGGGAAGGGAGGGAGAAAAAGGGAAGAAGGGAGAGGAACAA	hap_01	hap_01	AA	4	NA	TT	NA	SINE/SINE
dalmatian	dalmatian	dog_20243	ATAAAAAAGGAGGGGAAGGGAGGGAGAAAAAGGGAAGAAGGGAGAGGAACAA	ATAAAAAAGGAGGGGAAGGGAGGGAGAAAAAGGGAAGAAGGGAGAGGAACAA	hap_01	hap_01	AA	4	NA	TT	NA	SINE/SINE
dalmatian	dalmatian	dog_20244	ATAAAAAAGGAGGGGAAGGGAGGGAGAAAAAGGGAAGAAGGGAGAGGAACAA	GAAAAAAAGGAGGGGAAGGGAGGGAGAAAAAGGGAAGAAGGGAGAGGAACAA	hap_01	hap_06	AA	4	NA	TT	NA	SINE/SINE
dalmatian	dalmatian	dog_20245	ATAAAAAAGGAGGGGAAGGGAGGGAGAAAAAGGGAAGAAGGGAGAGGAACAA	ATAAAAAAGGAGGGGAAGGGAGGGAGAAAAAGGGAAGAAGGGAGAGGAACAA	hap_01	hap_01	AA	4	NA	TT	NA	SINE/SINE
dalmatian	dalmatian	dog_20246	GAAAAAAAGGAGGGGAAGGGAGGGAGAAAAAGGGAAGAAGGGAGAGGAACAA	GAAAAAAAGGAGGGGAAGGGAGGGAGAAAAAGGGAAGAAGGGAGAGGAACAA	hap_06	hap_06	AA	4	NA	TT	NA	SINE/SINE
dalmatian	dalmatian	dog_20247	ATAAAAAAGGAGGGGAAGGGAGGGAGAAAAAGGGAAGAAGGGAGAGGAACAA	ATAAAAAAGGAGGGGAAGGGAGGGAGAAAAAGGGAAGAAGGGAGAGGAACAA	hap_01	hap_01	AA	4	NA	TT	NA	SINE/SINE
dalmatian	dalmatian	dog_20248	ATAAAAAAGGAGGGGAAGGGAGGGAGAAAAAGGGAAGAAGGGAGAGGAACAA	ATAAAAAAGGAGGGGAAGGGAGGGAGAAAAAGGGAAGAAGGGAGAGGAACAA	hap_01	hap_01	AA	4	NA	TT	NA	SINE/SINE
dalmatian	dalmatian	dog_20249	ATAGGGAGGAAGGGGAGAAGGGGGAGAAAAAGGGAAGAAGGGAGAGGAACAA	ATAAAAAAGGAGGGGAAGGGAGGGAGAAAAAGGGAAGAAGGGAGAGGAACAA	hap_d003	hap_01	GA	4	NA	0	NA	SINE/SINE
dalmatian	dalmatian	dog_20250	ATAAAAAAGGAGGGGAAGGGAGGGAGAAAAAGGGAAGAAGGGAGAGGAACAA	GAAAAAAAGGAGGGGAAGGGAGGGAGAAAAAGGGAAGAAGGGAGAGGAACAA	hap_01	hap_06	AA	4	NA	TT	NA	SINE/SINE
dalmatian	dalmatian	dog_20251	ATAAAAAAGGAGGGGAAGGGAGGGAGAAAAAGGGAAGAAGGGAGAGGAACAA	GAAAAAAAGGAGGGGAAGGGAGGGAGAAAAAGGGAAGAAGGGAGAGGAACAA	hap_01	hap_06	AA	4	NA	TT	NA	SINE/SINE
dalmatian	dalmatian	dog_20252	ATAAAAAAGGAGGGGAAGGGAGGGAGAAAAAGGGAAGAAGGGAGAGGAACAA	ATAAAAAAGGAGGGGAAGGGAGGGAGAAAAAGGGAAGAAGGGAGAGGAACAA	hap_01	hap_01	AA	4	NA	TT	NA	SINE/SINE
dalmatian	dalmatian	dog_20253	ATAAAAAAGGAGGGGAAGGGAGGGAGAAAAAGGGAAGAAGGGAGAGGAACAA	ATAAAAAAGGAGGGGAAGGGAGGGAGAAAAAGGGAAGAAGGGAGAGGAACAA	hap_01	hap_01	AA	4	NA	TT	NA	SINE/SINE
dalmatian	dalmatian	dog_20254	GAAAAAAAGGAGGGGAAGGGAGGGAGAAAAAGGGAAGAAGGGAGAGGAACAA	ATAAAAAAGGAGGGGAAGGGAGGGAGAAAAAGGGAAGAAGGGAGAGGAACAA	hap_06	hap_01	AA	4	NA	TT	NA	SINE/SINE
dalmatian	dalmatian	dog_20255	ATAAAAAAGGAGGGGAAGGGAGGGAGAAAAAGGGAAGAAGGGAGAGGAACAA	ATAAAAAAGGAGGGGAAGGGAGGGAGAAAAAGGGAAGAAGGGAGAGGAACAA	hap_01	hap_01	AA	4	NA	TT	NA	SINE/SINE
dalmatian	dalmatian	dog_20256	ATAAAAAAGGAGGGGAAGGGAGGGAGAAAAAGGGAAGAAGGGAGAGGAACAA	GAAAAAAAGGAGGGGAAGGGAGGGAGAAAAAGGGAAGAAGGGAGAGGAACAA	hap_01	hap_06	AA	4	NA	TT	NA	SINE/SINE
dalmatian	dalmatian	dog_20257	GAAAAAAAGGAGGGGAAGGGAGGGAGAAAAAGGGAAGAAGGGAGAGGAACAA	GAAAAAAAGGAGGGGAAGGGAGGGAGAAAAAGGGAAGAAGGGAGAGGAACAA	hap_06	hap_06	AA	4	NA	TT	NA	SINE/SINE
dalmatian	dalmatian	dog_20258	ATAAAAAAGGAGGGGAAGGGAGGGAGAAAAAGGGAAGAAGGGAGAGGAACAA	ATAAAAAAGGAGGGGAAGGGAGGGAGAAAAAGGGAAGAAGGGAGAGGAACAA	hap_01	hap_01	AA	4	NA	TT	NA	SINE/SINE
dalmatian	dalmatian	dog_20259	ATAAAAAAGGAGGGGAAGGGAGGGAGAAAAAGGGAAGAAGGGAGAGGAACAA	GAAAAAAAGGAGGGGAAGGGAGGGAGAAAAAGGGAAGAAGGGAGAGGAACAA	hap_01	hap_06	AA	4	NA	TT	NA	SINE/SINE
dalmatian	dalmatian	dog_20260	ATAAAAAAGGAGGGGAAGGGAGGGAGAAAAAGGGAAGAAGGGAGAGGAACAA	ATAAAAAAGGAGGGGAAGGGAGGGAGAAAAAGGGAAGAAGGGAGAGGAACAA	hap_01	hap_01	AA	4	NA	TT	NA	SINE/SINE
dalmatian	dalmatian	dog_20261	ATAAAAAAGGAGGGGAAGGGAGGGAGAAAAAGGGAAGAAGGGAGAGGAACAA	ATAAAAAAGGAGGGGAAGGGAGGGAGAAAAAGGGAAGAAGGGAGAGGAACAA	hap_01	hap_01	AA	4	NA	TT	NA	SINE/SINE
dalmatian	dalmatian	dog_20262	ATAAAAAAGGAGGGGAAGGGAGGGAGAAAAAGGGAAGAAGGGAGAGGAACAA	ATAAAAAAGGAGGGGAAGGGAGGGAGAAAAAGGGAAGAAGGGAGAGGAACAA	hap_01	hap_01	AA	4	NA	TT	NA	SINE/SINE
*: Marker positions are indicated in S5 Fig
$: GWAS marker position at chr38:11,085,443
#: CWAS marker position at chr38:11,143,243
!: SINE insertion position at chr20:21,836,232
